# Supplementary material for: Plasma proteomic analysis of systemic lupus erythematosus patients using liquid chromatography/tandem mass spectrometry with label-free quantification
Source: PeerJ. 2018 May 8;6:e4730. doi: 10.7717/peerj.4730 (PMC5947061; doi:10.7717/peerj.4730)
Supplement: Supplemental Information 1 [file peerj-06-4730-s001.xlsx]

## Sheet: Proteins_SLE
Rashmi et al., 2017: Plasma proteomic analysis of systemic lupus erythematosus patients using liquid chromatography/tandem mass spectrometry
Supplementary Table S1: A complete list of identified proteins in the plasma samples of SLE Patients during triplicate analysis
S.No	Uniprot Accession	Protein_gi/accssion	UniprotKB	Protein_description	Protein_score	Protein_mass	Protein_sequence cover (%)	PSMs
1	P02647	gi|178775	APOA1_HUMAN	proapolipoprotein, partial	1211	28944	85.9	45
2	P02647	gi|2914175	Q9Y355_HUMAN	Chain A, Crystal Structure Of Human Apolipoprotein A-I	974	23389	90	42
3	P01130	gi|229479	LDLR_HUMAN	lipoprotein Gln I	567	28329	62.9	29
4	P02647	gi|178777	APOA1_HUMAN	proapo-A-I protein	1190	30745	74.5	18
5	A0A024R3E3	gi|119587681	A0A024R3E3_HUMAN	apolipoprotein A-I, isoform CRA_b, partial	933	23454	75.6	12
6	Q9Y355	gi|4960066	Q9Y355_HUMAN	apolipoprotein A1	180	7429	76.1	21
7	Q06AH7	gi|4557871	Q06AH7_HUMAN	serotransferrin precursor	1071	77000	64	49
8	P02787	gi|433286789	TRFE_HUMAN	Chain A, Bismuth Bound Human Serum Transferrin	1064	75147	63	8
9	A0PJA6	gi|37747855	A0PJA6_HUMAN	Transferrin	1057	77030	58.6	39
10	B4DHZ6	gi|119599572	B4DHZ6_HUMAN	transferrin, isoform CRA_c [Homo sapiens]	769	47357	69.8	27
11	P02787	gi|553788	TRFE_HUMAN	transferrin, partial	703	53725	63.7	32
12	P01023	gi|377656551	A2MG_HUMAN	Chain A, Alpha-2 Macroglobulin	1008	160691	50.2	36
13	P01023	gi|224053	A2MG_HUMAN	macroglobulin alpha2	985	160704	46.5	29
14	P01023	gi|177870	A2MG_HUMAN	alpha-2-macroglobulin precursor	981	163175	47.8	28
15	P01023	gi|177872	A2MG_HUMAN	alpha-2-macroglobulin, partial	381	70751	37.6	10
16	V9HWA9	gi|115298678	V9HWA9_HUMAN	complement C3 precursor	718	187030	22.3	8
17	P01024	gi|179665	CO3_HUMAN	complement component C3	671	187046	21.6	23
18	P01025	gi|119589476	CO3_HUMAN	complement component 3, isoform CRA_a	617	143619	24.1	21
19	P01024	gi|78101268	CO3_HUMAN	Chain B, Human Complement Component C3	427	112869	22.9	19
20	P01025	gi|118137965	CO3_HUMAN	Chain B, Structure Of Complement C3b	407	103886	23.4	15
21	P01024	gi|317455057	CO3_HUMAN	Chain B, Crystal Structure Of Complement C3b In Complex With Factors B And D	362	103572	21.7	18
22	P01024	gi|224983659	CO3_HUMAN	Chain A, C3b In Complex With A C3b Specific Fab	314	71201	24.4	11
23	P01024	gi|118137964	CO3_HUMAN	Chain A, Structure Of Complement C3b: Insights Into Complement Activation And Regulation	267	71288	22.6	10
24	P01024	gi|78101271	CO3_HUMAN	Chain C, Human Complement Component C3c	123	39463	17.8	19
25	P01024	gi|14488494	CO3_HUMAN	Chain A, Cr2-C3d Complex Structure	71	34437	14	10
26	P01024	gi|429544642	CO3_HUMAN	Chain A, Crystal Structure Of The Human C3a Anaphylatoxin	38	9473	15.7	11
27	P01009	gi|110350939	A1AT_HUMAN	alpha-1 antitrypsin variant	567	46577	60.5	8
28	P01009	gi|157831596	A1AT_HUMAN	Chain A, Alpha1-Antitrypsin	559	44223	60.4	15
29	P01009	gi|177836	A1AT_HUMAN	alpha-1-antitrypsin precursor [Homo sapiens]	557	46678	55	16
30	P01009	gi|224224	A1AT_HUMAN	antitrypsin alpha1 mutant	546	46702	54.5	29
31	P01009	gi|177831	A1AT_HUMAN	alpha-1-antitrypsin	515	46677	51.4	28
32	P01009	gi|177827	A1AT_HUMAN	alpha-1-antitrypsin	506	46616	52.5	9
33	P01009	gi|11514321	A1AT_HUMAN	Chain A, Crystal Structure Of A Serpin:protease Complex	481	37624	55.8	7
34	P01009	gi|7245932	A1AT_HUMAN	Chain A, Cleaved Alpha-1-Antitrypsin Polymer	480	36556	54.9	8
35	P01010	gi|223433	A1AT_HUMAN	inhibitor,alpha1 protease	377	44262	49.2	12
36	P00738	gi|4826762	HPT_HUMAN	haptoglobin isoform 1 preproprotein	505	45177	57.4	21
37		gi|119579599		haptoglobin, isoform CRA_b	481	50646	51.1	7
38	Q6PEJ8	gi|767989864	Q6PEJ8_HUMAN	haptoglobin isoform X1	450	38427	58.2	9
39		gi|119579600		haptoglobin, isoform CRA_c	426	40015	51.1	8
40	Q6NSB4	gi|47124562	Q6NSB4_HUMAN	HP protein	395	31362	59.4	13
41	P0C0L4	gi|187955901	CO4A_HUMAN	Complement component 4A	430	192655	20.7	23
42	P0C0L4	gi|443671	CO4A_HUMAN	complement component C4A, partial [Homo sapiens]	385	193541	18.6	6
43	P0C0L4	gi|356582273	CO4A_HUMAN	complement C4-A isoform 2 preproprotein	383	187586	18	2
44	P0C0L5	gi|1314244	CO4B_HUMAN	complement C4B precursor	354	188230	17	3
45	P0C0L5	gi|187771	CO4B_HUMAN	complement component C4B, partial	148	40737	24.9	4
46	P0C0L4	gi|223961	CO4A_HUMAN	complement C4d	124	31209	16.5	4
47	P0C0L5	gi|40737308	CO4B_HUMAN	C4B1, partial [Homo sapiens]	88	47523	15	5
48	P0C0L4	gi|24987346	CO4A_HUMAN	Chain A, C4adg Fragment Of Human Complement Factor C4a	77	39064	19.1	3
49	P02790	gi|386789	HEMO_HUMAN	hemopexin precursor, partial	382	51512	39.7	13
50	P02791	gi|119589127	HEMO_HUMAN	hemopexin, isoform CRA_d	307	43201	37.6	11
51	Q9BS19	gi|13529281	Q9BS19_HUMAN	HPX protein	221	28612	33.9	18
52	Q9BS20	gi|119589124	Q9BS19_HUMAN	hemopexin, isoform CRA_a	180	22935	46.6	11
53	Q9BS21	gi|226337	Q9BS19_HUMAN	hemopexin	178	13338	43.3	16
54	P02763	gi|167857790	A1AG2_HUMAN	alpha-1-acid glycoprotein 1 precursor	263	23525	38.8	9
55	P19652	gi|29170378	A1AG2_HUMAN	alpha-1-acid glycoprotein 2 precursor	221	23442	23.9	5
56	P02763	gi|219519923	A1AG2_HUMAN	Orosomucoid 1	331	23532	33.8	7
57	P02763	gi|112877	A1AG2_HUMAN	Alpha-1-acid glycoprotein 1	255	23497	36.8	8
58	P19652	gi|323714404	A1AG2_HUMAN	Chain A, Crystal Structure Of The A Variant Of Human Alpha1-Acid Glycoprotein	146	22644	23.7	5
59	P01876	gi|113584	IGHA1_HUMAN	Ig alpha-1 chain C region	299	37631	48.4	10
60	P01859	gi|10799664	IGHG2_HUMAN	immunoglobulin heavy chain constant region	166	35898	29.8	16
61	P01857	gi|166007160	IGHG1_HUMAN	Chain C, Solution Structure Of Human Immunoglobulin M	159	56666	33.1	14
62	P0CG4-1	gi|21669539	IGLC1_HUMAN	immunoglobulin lambda light chain VLJ region	135	28119	32.8	17
63	P01871	gi|10334551	IGHM_HUMAN	immunoglobulin heavy constant mu	317	41246	37.1	16
64	P01876	gi|12054070	IGHA1_HUMAN	immunoglobulin heavy chain constant region alpha 1	291	37623	39.4	12
65	P01860	gi|12054076	IGHG3_HUMAN	immunoglobulin heavy chain constant region gamma 3	262	41300	30.8	14
66	P01764	gi|226427206	HV323_HUMAN	immunoglobulin heavy chain gamma-3 variant	242	52054	26.2	14
67	P01877	gi|184761	IGHA2_HUMAN	immunoglobulin alpha-2 heavy chain, partial	224	36414	30.4	18
68	P01860	gi|567112	IGHG3_HUMAN	OMM protein (Ig gamma3) heavy chain	202	34874	25.6	12
69	P01871	gi|10334595	IGHM_HUMAN	immunoglobulin heavy chain	188	39636	33.4	8
70	P23083	gi|2146957	HV102_HUMAN	Ig heavy chain V region precursor - human	180	41757	43.6	18
71	P01877	gi|169249224	IGHA2_HUMAN	immunoglobulin heavy chain constant alpha 1 membrane bound isoform 1	178	19624	40.6	16
72	S6AWD9	gi|524453729	S6AWD9_HUMAN	IgG H chain	158	33282	32.2	11
73		gi|223069		protein Tro alpha1 H,myeloma	135	51040	18.9	7
74	S6BAN6	gi|524453734	S6BAN6_HUMAN	IgG L chain	123	22905	33.8	8
75		gi|194173403	IGL_HUMAN	immunoglobulin light chain	120	22583	38.4	10
76	P01706	gi|21669611	LV211_HUMAN	immunoglobulin lambda light chain VLJ region	116	28822	25.6	7
77	P01715	gi|106635	IGLV_HUMAN	Ig lambda chain - human	115	24709	32.5	11
78	P01706	gi|21669509	LV211_HUMAN	immunoglobulin lambda light chain VLJ region	103	28228	20.1	8
79	P01871	gi|2414492	IGHM_HUMAN	immunoglobulin heavy chain, constant region	92	25734	13.5	18
80	P01860	gi|12054074	IGHG3_HUMAN	immunoglobulin heavy chain constant region gamma 2	92	35938	23.3	12
81	P01706	gi|170684534	LV211_HUMAN	immunoglobulin lambda 2 light chain	92	23029	32.4	14
82	C0JYY2	gi|178730	C0JYY2_HUMAN	apolipoprotein B-100 precursor	288	515236	9.5	28
83	P01019	gi|532198	ANGT_HUMAN	angiotensinogen	274	53122	16.9	16
84	P01019	gi|4261987	ANGT_HUMAN	angiotensinogen, partial	163	12491	34.7	8
85	P02671	gi|182424	FIBA_HUMAN	alpha-fibrinogen precursor	244	69767	16.9	8
86	D3DP16	gi|119625329	D3DP16_HUMAN	fibrinogen alpha chain, isoform CRA_a	228	24851	13.2	6
87	P02671	gi|223918	FIBA_HUMAN	fibrinogen alphaA	148	49366	5.8	7
88	P01011	gi|177933	AACT_HUMAN	alpha-1-antichymotrypsin precursor, partial	201	45453	35.1	12
89	P01011	gi|46981959	AACT_HUMAN	growth-inhibiting protein 24	197	47644	28.6	11
90	P01011	gi|21961493	AACT_HUMAN	Serpin peptidase inhibitor, clade A (alpha-1 antiproteinase, antitrypsin), member 3	190	47649	30.5
91	P01011	gi|177809	AACT_HUMAN	alpha-1-antichymotrypsin	174	48606	28.2	9
92	G3V3A0	gi|119601993	G3V3A0_HUMAN	serpin peptidase inhibitor, clade A (alpha-1 antiproteinase, antitrypsin), member 3, isoform CRA_a	163	23391	53.2	8
93		gi|229526		protein Rei,Bence-Jones	189	23494	26.6	7
94	P01619	gi|21669319	KV320_HUMAN	immunoglobulin kappa light chain VLJ region	143	28054	21	12
95	P01593	gi|1136555	KVD33_HUMAN	immunoglobulin light chain variable region, partial	94	15755	23.8	11
96		gi|578807068		PREDICTED: ceruloplasmin isoform X5	145	103123	11.9	8
97	Q6NSB2	gi|47125416	Q6NSB2_HUMAN	CP protein, partial	116	24668	29.3	6
98	P00450	gi|180249	CERU_HUMAN	ceruloplasmin, partial	88	97637	8	8
99	P04217	gi|69990	A1BG_HUMAN	alpha-1-B-glycoprotein	176	51908	32.5	9
100	P04217	gi|15778556	A1BG_HUMAN	alpha-1-B glycoprotein precursor	125	54176	18.6	6
101	P02656	gi|186972736	APOC3_HUMAN	Chain A, Structure And Dynamics Of Human Apolipoprotein C-Iii	171	8759	64.6	4
102	B0YIW2	gi|167887493	B0YIW2_HUMAN	apolipoprotein C-III precursor variant 1	152	12807	29.1	6
103	Q14624	gi|1483187	ITIH4_HUMAN	inter-alpha-trypsin inhibitor family heavy chain-related protein (IHRP)	163	103321	17.8	5
104	A0A096LPE2	gi|315075331	A0A096LPE2_HUMAN	SAA2-SAA2 protein precursor	149	23338	31.3	5
105	D3DQX7	gi|119588814	D3DQX7_HUMAN	serum amyloid A1, isoform CRA_a	104	13554	11.5	8
106	P35542	gi|259352	SAA4_HUMAN	serum amyloid A	66	14797	39.2	7
107	P02679	gi|223170	FIBG_HUMAN	fibrinogen gamma	128	46252	26.6	12
108		gi|119625311		fibrinogen gamma chain, isoform CRA_b	96	15331	32.8	5
109		gi|119625313		fibrinogen gamma chain, isoform CRA_d	72	8705	40.8	6
110	P05155	gi|179621	IC1_HUMAN	plasma protease (C1) inhibitor precursor	123	55118	15	12
111	P05155	gi|179617	IC1_HUMAN	C1-inhibitor, partial	93	32688	20.5	17
112	P05156	gi|119594169	IC1_HUMAN	serpin peptidase inhibitor, clade G (C1 inhibitor), member 1, (angioedema, hereditary), isoform CRA_b	75	21826	22	8
113	P06727	gi|178757	APOA4_HUMAN	apolipoprotein A-IV precursor	101	45353	18.7	7
114	P06727	gi|387766087	APOA4_HUMAN	Chain A, Dimeric Apoa-Iv	79	31499	19	4
115	P02766	gi|2098255	TTHY_HUMAN	Chain A, Tertiary Structures Of Three Amyloidogenic Transthyretin Variants	91	13806	56.7	3
116	Q53WY6	gi|1336728	Q53WY6_HUMAN	transthyretin, partial	77	4567	29.5	8
117	P01008	gi|999513	ANT3_HUMAN	Chain A, The Intact And Cleaved Human Antithrombin Iii Complex As A Model For Serpin-Proteinase Interactions	84	49008	10.6	6
118	A0A0K0Q2Z1	gi|893689486	A0A0K0Q2Z1_HUMAN	serpin peptidase inhibitor clade C member 1	64	52509	7.1	1
119	Q9UBW9	gi|179152	Q9UBW9_HUMAN	antithrombin III, partial	62	6282	37.9	1
120	P01880	gi|106368	IGHD_HUMAN	Ig delta chain (WIE) - human	74	55864	2.6	1
121	P02765	gi|112910	FETUA_HUMAN	Alpha-2-HS-glycoprotein	72	39300	8.2	1
122	P04196	gi|4504489	HRG_HUMAN	histidine-rich glycoprotein precursor	67	59541	2.7	1
