# Supplementary material for: Plasma proteomic analysis of systemic lupus erythematosus patients using liquid chromatography/tandem mass spectrometry with label-free quantification
Source: PeerJ. 2018 May 8;6:e4730. doi: 10.7717/peerj.4730 (PMC5947061; doi:10.7717/peerj.4730)
Supplement: Supplemental Information 2 [file peerj-06-4730-s002.xlsx]

## Sheet: Diff. regulated proteins
Rashmi et al., 2017: Plasma proteomic analysis of systemic lupus erythematosus patients using liquid chromatography/tandem mass spectrometry
Supplementary Table S2: A complete list of differentially expressed significant proteins identified in the SLE Patients samples compared to healthy controls
Gene name	UniProt/SwissProt	Protein name discription	No.of peptides	Unique peptides	Protein Group	Protein ID	-10lgP	Avg. Mass	Significance	coverage(%)	PSMs	Unique peptides	Area under the curve (Peaks software)									standard deviation	Fold Change	P-Value	emPAI								Average	Standard deviation	Fold Change	P-Value
													Triplicate analysis					Triplicate analysis							Triplicate analysis					Triplicate analysis
													SET 1( n = 19)Average area	SET2 (n=19)Average area	SET3 (n=19)Average area	Area uder the cure (Peaks software)		SET1 (n=12)Average area	SET2 (n=12)Average area	SET3 (n=12)Average area	Area under the curve (Peaks software)				Set 1 (n=19)	Set 2 (n=19)	Set 3 (n=19)	Average		SET1 (n=12)	Set2 (n=12)	Set3 (n=12)
													SLE Patients	SLE Patients	SLE Patients	Average	STDEV	Healthy	Healthy	Healthy	Average				Patients	Patients	Patients		Standard deviation	Healthy	Healthy	Healthy
TF	P02787|TRFE_HUMAN	Serotransferrin precursor	177	176	2	4	474.46	77064	67.73	55	391	Y	299937	363010	276934	313294	44564.8	129577	112404	160503	134161	24375	2.33521	0.00363604	3.34	3.1	3.4	3.28	0.158745	1.18	1.16	1.23	1.19	0.0360555	2.7563	2.42093e-05
HP	P00738|HPT_HUMAN	Haptoglobin	79	50	8	7	382.5	45205	82.47	50	190	Y	174850	344441	309385	276225	89525.8	127580	100085	137066	121577	19207.2	2.27202	0.0430108	4.92417	4.8875	5.49417	5.10194	0.340169	1.10333	1.015	1.17917	1.09917	0.0821626	4.64165	3.82957e-05
HBB	P68871|HBB_HUMAN	Hemoglobin subunit beta	48	28	14	24	321.52	15998	71.03	70	106	Y	150421	305804	209566	221931	78425.9	89645.1	65468.1	96691.9	83935	16376.4	2.64408	0.0406056	3.31	3.2	3.7	3.40333	0.262742	1.19	1.23	1.36	1.26	0.0888819	2.70106	0.000180213
ORM1	P19652|A1AG2_HUMAN	alpha-1-acid glycoprotein 2 precursor	21	13	37	41	234.44	23603	59.43	31	29	Y	91789.7	158693	185079	145187	48088.9	65147.2	59835.6	67097.2	64026.7	3758.28	2.26761	0.0434892	1.70917	2.4125	1.75083	1.9575	0.394592	0.950833	0.9425	1.00833	0.967222	0.0358463	2.02384	0.0123597
ORM2	P02763|A1AG1_HUMAN	alpha1-acid glycoprotein 1	26	17	30	40	306.74	23512	58.59	20	38	Y	102323	237913	203968	181402	70555.5	62782.6	63669.6	63808.7	63420.3	556.612	2.86031	0.0442862	2.1025	2.77417	1.9375	2.27139	0.443165	0.959167	0.913333	0.978333	0.950278	0.0333992	2.39024	0.00675014
IGKC	P01624|KV315_HUMAN	Immunoglobulin kappa variable 3-15	9	9	68	68	153.3	12496	42.47	23	15	Y	46117.3	102691	96164	81657.3	30951.1	30533.3	25983.3	29700	28738.9	2422.48	2.84135	0.0418719	0.681667	0.84	0.645	0.722222	0.103633	0.261667	0.331667	0.2925	0.295278	0.0350826	2.44591	0.00249915
A2M	P01023|A2MG_HUMAN	Alpha-2 Macroglobulin	203	178	3	3	513.13	163290	47.58	35	381	Y	6.57079e+06	8.0008e+06	6.03888e+06	6.87016e+06	1.01464e+06	586268	4.15609e+06	695752	1.8127e+06	2.03017e+06	3.79001	0.0181533	3.63833	4.155	3.93417	3.90917	0.259239	1.19417	1.565	1.25417	1.33778	0.199054	2.92213	0.000167946
CP	P00450|CERU_HUMAN	Ceruloplasmin	74	74	13	5	392.33	122205	34.9	12	106	Y	127962	220038	145982	164661	48797	45548.3	39144.2	51909	45533.8	6382.42	3.61623	0.0137764	0.3325	0.396667	0.400833	0.376667	0.0383061	0.1655	0.13675	0.205	0.169083	0.0342658	2.2277	0.00219726
IGKV1	P01602|KV105_HUMAN	Immunoglobulin kappa variable chain 1-5	4	4	93	87	128.02	12782	28.57	32	23	Y	63882.6	71952.2	123835	86556.5	32535.1	3882.61	7952.17	13834.8	8556.52	5003.54	10.1159	0.0148022	2.86	2.41	2.51	2.59333	0.236291	0.26	0.21	0.23	0.233333	0.0251661	11.1143	6.70075e-05
A1ACT	P01011|AACT_HUMAN	alpha-1-antichymotrypsin precursor	25	25	39	19	231.06	47651	24.13	13	32	Y	40231.6	12458.4	88708.4	47132.8	38590.6	17174.4	16962	14230.4	16122.3	1641.84	2.92346	0.236722	0.584167	0.964167	0.5825	0.710278	0.219876	0.5625	0.474167	0.6925	0.576389	0.109827	1.23229	0.39883
A1BG	P04217|A1BG_HUMAN	alpha-1-B-glycoprotei	37	37	20	22	320.3	54254	26.64	20	55	Y	47826.9	83310.5	91285.1	74140.8	23134.7	34409.6	26897.6	33703.4	31670.2	4148.29	2.34103	0.0351929	1.095	1.33667	1.13417	1.18861	0.129707	0.430833	0.4825	0.51	0.474444	0.0401934	2.50527	0.000805549
A1AT	P01009|A1AT_HUMAN	alpha-1 antitrypsin variant	128	128	4	1	424.64	46737	30.1	68	244	Y	294400	293420	208398	265406	49373.2	90043.9	74733	86753.4	83843.4	8059.6	3.1655	0.00327096	20.995	20.995	22.2442	21.4114	0.721207	5.72333	5.80083	6.05083	5.85833	0.171154	3.65486	3.42205e-06
APOB	P04114|APOB_HUMAN	apolipoprotein B-100	45	45	32	13	283.26	515611	22.69	10	53	Y	18725.6	46729.6	29867.5	31774.2	14099	7017	8185	8858.5	8020.17	931.75	3.96179	0.0435992	0.227273	0.330833	0.251667	0.269924	0.0541406	0.0933333	0.114167	0.123333	0.110278	0.0153734	2.44768	0.00796852
IGHG4	P01861|IGHG4_HUMAN	immunoglobulin heavy chain gamma 4	64	16	9	17	342.11	35941	23.97	45	129	Y	242288	487729	491607	407208	142838	119033	108424	129293	118917	10435.2	3.42432	0.0252024	2.73	3.5	3.1	3.11	0.385097	1.42405	1.173	0.891	1.16268	0.266675	2.67485	0.00197161
TTR	P02766|TTHY_HUMAN	Transthyretin	38	38	22	39	345.31	15887	29.29	8	52	Y	105275	168796	151622	141898	32858.1	191784	212294	216847	206975	13351.4	0.68558	0.0335972	1.2825	0.521667	1.51417	1.10611	0.519229	5.88083	6.33083	6.4625	6.22472	0.305006	0.177696	0.000123874
HPX	P02790|HEMO_HUMAN	hemopexin	41	41	19	12	315.39	51676	29.91	18	55	Y	24463.1	24766.4	39385.1	29538.2	8529.02	131949	114187	125996	124044	9040.77	0.238127	0.000192003	1.27	0.13	0.1412	0.513733	0.65497	3.03143	3.86	3.84	3.57714	0.472706	0.143615	0.00277894
APOA2	P02652|APOA2_HUMAN	apolipoportein A2	19	19	40	52	197.47	11175	53.33	19	21	Y	29261	55747.1	39825.7	41611.3	13333.1	69014.1	58955.7	73125.2	67031.6	7289.82	0.620771	0.04423	1.23	0.09	0.0891	0.4697	0.658439	3.24901	3.634	3.35	3.411	0.199613	0.137701	0.00177475
APOA1	P02647|APOA1_HUMAN	apolipoportien A1	78	78	7	9	379.49	30778	48.52	67	144	Y	45408	57254	75796.7	59486.3	15316.8	120880	105948	141336	122722	17765.9	0.484725	0.00952359	1.2	0.08	0.013	0.431	0.666816	3.29436	3.615	3.315	3.40812	0.179459	0.126463	0.00171896
CLU	P10909|CLUS_HUMAN	Clusterin	5	5	81	61	149.91	52495	24.56	6	6	Y	15741.7	38925	37091.7	30586.1	12888.3	87411.1	69255.6	89733.3	82133.3	11212.8	0.372396	0.00639967	1.03	0.002	0.0024	0.3448	0.593401	3.83706	3.876	3.743	3.81869	0.0683767	0.0902929	0.00054637
