# Supplementary material for: Plasma proteomic analysis of systemic lupus erythematosus patients using liquid chromatography/tandem mass spectrometry with label-free quantification
Source: PeerJ. 2018 May 8;6:e4730. doi: 10.7717/peerj.4730 (PMC5947061; doi:10.7717/peerj.4730)
Supplement: Supplemental Information 6 [file peerj-06-4730-s006.xlsx]

## Sheet: Sheet1
Rashmi et al., 2017: Plasma proteomic analysis of systemic lupus erythematosus patients using liquid chromatography/tandem mass spectrometry
Supplementary Table S4: Gene ontology molecular function (MF) data for all the identified proteins** from SLE patients
GO-Molecular Function	Homo sapiens - REFLIST (21042)	No.of proteins	No.of proteins(expected)	No.of proteins(involved)	fold Enrichment	P-value
lipid transporter activity (GO:0005319)	43	6	0.03	+	61.17	0.000492
enzyme inhibitor activity (GO:0004857)	89	6	0.07	+	29.55	0.00206
serine-type endopeptidase inhibitor activity (GO:0004867)	58	4	0.04	+	22.67	0.0432
lipid binding (GO:0008289)	124	4	0.09	+	21.21	0.00394
enzyme regulator activity (GO:0030234)	550	6	0.42	+	7.17	0.00775
receptor binding (GO:0005102)	782	9	0.59	+	5.05	0.02
