# Supplementary material for: Plasma proteomic analysis of systemic lupus erythematosus patients using liquid chromatography/tandem mass spectrometry with label-free quantification
Source: PeerJ. 2018 May 8;6:e4730. doi: 10.7717/peerj.4730 (PMC5947061; doi:10.7717/peerj.4730)
Supplement: Supplemental Information 7 — Out of 19 SLE patients triplicate analysis, we have uploaded one SLE patient raw data LC-MS/MS as a reference. [file peerj-06-4730-s007.xlsx]

## Sheet: Sheet1
Rashmi et al., 2017: Plasma proteomic analysis of systemic lupus erythematosus patients using liquid chromatography/tandem mass spectrometry
Supplementary Table S7: A representative LC-MS/MS proteomic analysis report of SLE patients complete list of identified proteins compared to healthy controls
prot_family_member	prot_acc	prot_description	prot_score	prot_mass	prot_matches	prot_matches_sig	prot_sequences	prot_sequences_sig	prot_cover	pep_query	pep_rank	pep_isbold	pep_isunique	pep_exp_mz	pep_exp_mr	pep_exp_z	pep_calc_mr	pep_delta	pep_miss	pep_score	pep_expect	pep_res_before	pep_seq	pep_res_after
1	gi|110590597	Chain A, Apo-Human Serum Transferrin (Non-Glycosylated)	2511	74643	155	102	80	61	75.7	1432	1	1	0	690.683	2069.03	3	2069.02	0.0045	0	29.92	0.0016	K	EDLIWELLNQAQEHFGK	D
1	gi|110590597	Chain A, Apo-Human Serum Transferrin (Non-Glycosylated)	2511	74643	155	102	80	61	75.7	1433	1	1	0	1035.52	2069.03	2	2069.02	0.0047	0	46.26	0.00075	K	EDLIWELLNQAQEHFGK	D
1	gi|110590597	Chain A, Apo-Human Serum Transferrin (Non-Glycosylated)	2511	74643	155	102	80	61	75.7	1438	1	1	0	1036.47	2070.92	2	2070.92	0.0008	0	41.21	0.00047	K	SDNCEDTPEAGYFAVAVVK	K
1	gi|110590597	Chain A, Apo-Human Serum Transferrin (Non-Glycosylated)	2511	74643	155	102	80	61	75.7	1450	1	1	0	1041.45	2080.88	2	2080.88	-0.0025	1	8.68	0.25	R	WCAVSEHEATKCQSFR	D
1	gi|110590597	Chain A, Apo-Human Serum Transferrin (Non-Glycosylated)	2511	74643	155	102	80	61	75.7	1475	1	1	0	1049.02	2096.02	2	2096.02	0.001	2	7.9	0.37	R	SETKDLLFRDDTVCLAK	L
1	gi|110590597	Chain A, Apo-Human Serum Transferrin (Non-Glycosylated)	2511	74643	155	102	80	61	75.7	1549	1	1	0	724.372	2170.09	3	2170.09	0.0064	0	71.3	4.4e-06	R	SAGWNIPIGLLYCDLPEPR	K
1	gi|110590597	Chain A, Apo-Human Serum Transferrin (Non-Glycosylated)	2511	74643	155	102	80	61	75.7	1550	1	1	0	1086.06	2170.1	2	2170.09	0.009	0	60.29	1.8e-05	R	SAGWNIPIGLLYCDLPEPR	K
1	gi|110590597	Chain A, Apo-Human Serum Transferrin (Non-Glycosylated)	2511	74643	155	102	80	61	75.7	1556	1	1	0	725.032	2172.08	3	2172.07	0.0005	2	44.23	0.00032	K	DLLFRDDTVCLAKLHDR	N
1	gi|110590597	Chain A, Apo-Human Serum Transferrin (Non-Glycosylated)	2511	74643	155	102	80	61	75.7	1567	1	1	0	732.049	2193.13	3	2193.12	0.0039	2	4.39	0.55	K	SKEFQLFSSPHGKDLLFK	D
1	gi|110590597	Chain A, Apo-Human Serum Transferrin (Non-Glycosylated)	2511	74643	155	102	80	61	75.7	1586	1	1	0	1107.56	2213.1	2	2213.09	0.0033	0	45.38	0.00015	R	SAGWNIPIGLLYCDLPEPR	K
1	gi|110590597	Chain A, Apo-Human Serum Transferrin (Non-Glycosylated)	2511	74643	155	102	80	61	75.7	1643	1	1	0	759.382	2275.12	3	2275.12	0	1	42.59	0.13	K	DGAGDVAFVKHSTIFENLANK	A
1	gi|110590597	Chain A, Apo-Human Serum Transferrin (Non-Glycosylated)	2511	74643	155	102	80	61	75.7	1644	1	1	0	1138.57	2275.13	2	2275.12	0.0041	1	45.29	0.0072	K	DGAGDVAFVKHSTIFENLANK	A
1	gi|110590597	Chain A, Apo-Human Serum Transferrin (Non-Glycosylated)	2511	74643	155	102	80	61	75.7	1662	1	1	1	767.719	2300.13	3	2300.13	0.0039	1	44.05	0.00035	R	TAGWNIPMGLLYNKINHCR	F
1	gi|110590597	Chain A, Apo-Human Serum Transferrin (Non-Glycosylated)	2511	74643	155	102	80	61	75.7	1663	1	1	1	1151.07	2300.13	2	2300.13	0.004	1	44.79	0.00056	R	TAGWNIPMGLLYNKINHCR	F
1	gi|110590597	Chain A, Apo-Human Serum Transferrin (Non-Glycosylated)	2511	74643	155	102	80	61	75.7	1686	1	1	0	773.718	2318.13	3	2318.13	0.0043	1	24.86	0.028	K	DGAGDVAFVKHSTIFENLANK	A
1	gi|110590597	Chain A, Apo-Human Serum Transferrin (Non-Glycosylated)	2511	74643	155	102	80	61	75.7	1687	1	1	0	1160.07	2318.13	2	2318.13	0.0053	1	34.57	0.00089	K	DGAGDVAFVKHSTIFENLANK	A
1	gi|110590597	Chain A, Apo-Human Serum Transferrin (Non-Glycosylated)	2511	74643	155	102	80	61	75.7	1693	1	1	0	778.056	2331.15	3	2331.15	-0.0042	2	16	0.27	R	NTYEKYLGEEYVKAVGNLR	K
1	gi|110590597	Chain A, Apo-Human Serum Transferrin (Non-Glycosylated)	2511	74643	155	102	80	61	75.7	1694	1	1	0	1166.58	2331.15	2	2331.15	-0.0006	2	56.18	0.00025	R	NTYEKYLGEEYVKAVGNLR	K
1	gi|110590597	Chain A, Apo-Human Serum Transferrin (Non-Glycosylated)	2511	74643	155	102	80	61	75.7	1699	1	1	1	781.061	2340.16	3	2340.19	-0.0297	2	5.41	0.58	R	TAGWNIPKGLLYNKINHCR	F
1	gi|110590597	Chain A, Apo-Human Serum Transferrin (Non-Glycosylated)	2511	74643	155	102	80	61	75.7	1701	1	1	1	782.054	2343.14	3	2343.14	0.0037	1	14.7	0.057	R	TAGWNIPMGLLYNKINHCR	F
1	gi|110590597	Chain A, Apo-Human Serum Transferrin (Non-Glycosylated)	2511	74643	155	102	80	61	75.7	1702	1	1	1	1172.58	2343.14	2	2343.14	0.005	1	7.96	0.18	R	TAGWNIPMGLLYNKINHCR	F
1	gi|110590597	Chain A, Apo-Human Serum Transferrin (Non-Glycosylated)	2511	74643	155	102	80	61	75.7	1710	1	1	0	786.055	2355.14	3	2355.15	-0.0066	1	9.07	0.18	K	EDLIWELLNQAQEHFGKDK	S
1	gi|110590597	Chain A, Apo-Human Serum Transferrin (Non-Glycosylated)	2511	74643	155	102	80	61	75.7	1711	1	1	0	1178.58	2355.15	2	2355.15	0.0022	1	23.19	0.0088	K	EDLIWELLNQAQEHFGKDK	S
1	gi|110590597	Chain A, Apo-Human Serum Transferrin (Non-Glycosylated)	2511	74643	155	102	80	61	75.7	1739	1	1	0	800.393	2398.16	3	2398.16	0.0016	1	2.23	0.9	K	EDLIWELLNQAQEHFGKDK	S
1	gi|110590597	Chain A, Apo-Human Serum Transferrin (Non-Glycosylated)	2511	74643	155	102	80	61	75.7	1740	1	1	0	1200.09	2398.16	2	2398.16	0.0019	1	4.19	0.57	K	EDLIWELLNQAQEHFGKDK	S
1	gi|110590597	Chain A, Apo-Human Serum Transferrin (Non-Glycosylated)	2511	74643	155	102	80	61	75.7	1825	1	1	1	844.085	2529.23	3	2529.23	0.0013	1	42.4	0.00073	R	SMGGKEDLIWELLNQAQEHFGK	D
1	gi|110590597	Chain A, Apo-Human Serum Transferrin (Non-Glycosylated)	2511	74643	155	102	80	61	75.7	1847	1	1	1	637.315	2545.23	4	2545.26	-0.0296	1	1.27	0.76	R	SFGGKEDLIWELLNQAQEHFGK	D
1	gi|110590597	Chain A, Apo-Human Serum Transferrin (Non-Glycosylated)	2511	74643	155	102	80	61	75.7	1852	1	1	0	638.08	2548.29	4	2548.29	0.0033	1	60.71	2.5e-06	R	KPVDEYKDCHLAQVPSHTVVAR	S
1	gi|110590597	Chain A, Apo-Human Serum Transferrin (Non-Glycosylated)	2511	74643	155	102	80	61	75.7	1869	1	1	1	858.419	2572.23	3	2572.24	-0.0037	1	5.46	0.49	R	SMGGKEDLIWELLNQAQEHFGK	D
1	gi|110590597	Chain A, Apo-Human Serum Transferrin (Non-Glycosylated)	2511	74643	155	102	80	61	75.7	1870	1	1	1	1287.13	2572.24	2	2572.24	-0.0003	1	25.58	0.004	R	SMGGKEDLIWELLNQAQEHFGK	D
1	gi|110590597	Chain A, Apo-Human Serum Transferrin (Non-Glycosylated)	2511	74643	155	102	80	61	75.7	1871	1	1	1	858.421	2572.24	3	2572.24	0.0029	1	41.22	0.00027	R	SMGGKEDLIWELLNQAQEHFGK	D
1	gi|110590597	Chain A, Apo-Human Serum Transferrin (Non-Glycosylated)	2511	74643	155	102	80	61	75.7	1872	1	1	1	1287.13	2572.24	2	2572.24	0.0053	1	33.27	0.0019	R	SMGGKEDLIWELLNQAQEHFGK	D
1	gi|110590597	Chain A, Apo-Human Serum Transferrin (Non-Glycosylated)	2511	74643	155	102	80	61	75.7	1873	3	1	1	858.422	2572.24	3	2572.24	0.0062	1	1.62	1	R	SMGGKEDLIWELLNQAQEHFGK	D
1	gi|110590597	Chain A, Apo-Human Serum Transferrin (Non-Glycosylated)	2511	74643	155	102	80	61	75.7	1893	1	1	1	863.752	2588.23	3	2588.23	0.0016	1	19.08	0.016	R	SMGGKEDLIWELLNQAQEHFGK	D
1	gi|110590597	Chain A, Apo-Human Serum Transferrin (Non-Glycosylated)	2511	74643	155	102	80	61	75.7	1897	1	1	0	648.832	2591.3	4	2591.29	0.007	1	48.51	3.2e-05	R	KPVDEYKDCHLAQVPSHTVVAR	S
1	gi|110590597	Chain A, Apo-Human Serum Transferrin (Non-Glycosylated)	2511	74643	155	102	80	61	75.7	1901	1	1	0	866.775	2597.3	3	2597.3	0.0026	2	22.78	0.36	R	CLVEKGDVAFVKHQTVPQNTGGK	N
1	gi|110590597	Chain A, Apo-Human Serum Transferrin (Non-Glycosylated)	2511	74643	155	102	80	61	75.7	1912	1	1	0	1304.65	2607.28	2	2607.28	-0.0009	2	40.71	0.06	K	SVIPSDGPSVACVKKASYLDCIR	A
1	gi|110590597	Chain A, Apo-Human Serum Transferrin (Non-Glycosylated)	2511	74643	155	102	80	61	75.7	1913	1	1	0	870.101	2607.28	3	2607.28	0.0033	2	27.23	0.26	K	SVIPSDGPSVACVKKASYLDCIR	A
1	gi|110590597	Chain A, Apo-Human Serum Transferrin (Non-Glycosylated)	2511	74643	155	102	80	61	75.7	1917	1	1	1	872.753	2615.24	3	2615.24	-0.0054	1	1.61	0.74	R	SMGGKEDLIWELLNQAQEHFGK	D
1	gi|110590597	Chain A, Apo-Human Serum Transferrin (Non-Glycosylated)	2511	74643	155	102	80	61	75.7	1934	1	1	0	879.107	2634.3	3	2634.3	0.0019	1	50.4	0.021	R	KPVDEYKDCHLAQVPSHTVVAR	S
1	gi|110590597	Chain A, Apo-Human Serum Transferrin (Non-Glycosylated)	2511	74643	155	102	80	61	75.7	1935	1	1	0	659.582	2634.3	4	2634.3	0.0032	1	20.34	0.76	R	KPVDEYKDCHLAQVPSHTVVAR	S
1	gi|110590597	Chain A, Apo-Human Serum Transferrin (Non-Glycosylated)	2511	74643	155	102	80	61	75.7	1949	1	1	0	886.436	2656.29	3	2656.29	-0.0013	2	4.69	0.52	K	EDLIWELLNQAQEHFGKDKSK	E
1	gi|110590597	Chain A, Apo-Human Serum Transferrin (Non-Glycosylated)	2511	74643	155	102	80	61	75.7	1964	1	1	0	893.443	2677.31	3	2677.3	0.0056	1	59.46	2.7e-06	R	KPVDEYKDCHLAQVPSHTVVAR	S
1	gi|110590597	Chain A, Apo-Human Serum Transferrin (Non-Glycosylated)	2511	74643	155	102	80	61	75.7	1994	1	1	0	907.453	2719.34	3	2719.34	-0.0016	2	30.28	0.51	K	CLKDGAGDVAFVKHSTIFENLANK	A
1	gi|110590597	Chain A, Apo-Human Serum Transferrin (Non-Glycosylated)	2511	74643	155	102	80	61	75.7	2034	1	1	0	935.448	2803.32	3	2803.32	-0.0004	2	88.49	9e-09	K	NPDPWAKNLNEKDYELLCLDGTR	K
1	gi|110590597	Chain A, Apo-Human Serum Transferrin (Non-Glycosylated)	2511	74643	155	102	80	61	75.7	2037	1	1	1	939.454	2815.34	3	2815.36	-0.0209	2	12.81	0.063	R	SMGGKEDLIWELLNQAQEHFGKDK	S
1	gi|110590597	Chain A, Apo-Human Serum Transferrin (Non-Glycosylated)	2511	74643	155	102	80	61	75.7	2038	1	1	1	939.461	2815.36	3	2815.36	0.0019	2	20.71	0.011	R	SMGGKEDLIWELLNQAQEHFGKDK	S
1	gi|110590597	Chain A, Apo-Human Serum Transferrin (Non-Glycosylated)	2511	74643	155	102	80	61	75.7	2039	1	1	1	704.848	2815.36	4	2815.36	0.0042	2	6.84	0.85	R	SMGGKEDLIWELLNQAQEHFGKDK	S
1	gi|110590597	Chain A, Apo-Human Serum Transferrin (Non-Glycosylated)	2511	74643	155	102	80	61	75.7	2041	1	1	1	704.85	2815.37	4	2815.36	0.011	2	10.84	0.096	R	SMGGKEDLIWELLNQAQEHFGKDK	S
1	gi|110590597	Chain A, Apo-Human Serum Transferrin (Non-Glycosylated)	2511	74643	155	102	80	61	75.7	2051	1	1	0	709.363	2833.42	4	2833.42	0.0025	2	21.77	0.12	K	EFQLFSSPHGKDLLFKDSAHGFLK	V
1	gi|110590597	Chain A, Apo-Human Serum Transferrin (Non-Glycosylated)	2511	74643	155	102	80	61	75.7	2052	1	1	0	945.481	2833.42	3	2833.42	0.0036	2	25.81	0.018	K	EFQLFSSPHGKDLLFKDSAHGFLK	V
1	gi|110590597	Chain A, Apo-Human Serum Transferrin (Non-Glycosylated)	2511	74643	155	102	80	61	75.7	2072	1	1	1	953.797	2858.37	3	2858.37	0.0032	2	33.11	0.00079	R	SMGGKEDLIWELLNQAQEHFGKDK	S
1	gi|110590597	Chain A, Apo-Human Serum Transferrin (Non-Glycosylated)	2511	74643	155	102	80	61	75.7	2073	1	1	1	953.797	2858.37	3	2858.37	0.0041	2	26.38	0.017	R	SMGGKEDLIWELLNQAQEHFGKDK	S
1	gi|110590597	Chain A, Apo-Human Serum Transferrin (Non-Glycosylated)	2511	74643	155	102	80	61	75.7	2083	1	1	0	959.816	2876.43	3	2876.42	0.0028	2	12.23	0.081	K	EFQLFSSPHGKDLLFKDSAHGFLK	V
1	gi|110590597	Chain A, Apo-Human Serum Transferrin (Non-Glycosylated)	2511	74643	155	102	80	61	75.7	2143	1	1	0	760.09	3036.33	4	3036.33	0.002	1	31.9	0.62	R	EGTCPEAPTDECKPVKWCALSHHER	L
1	gi|110590597	Chain A, Apo-Human Serum Transferrin (Non-Glycosylated)	2511	74643	155	102	80	61	75.7	2161	1	1	0	770.842	3079.34	4	3079.33	0.0046	1	27.74	0.38	R	EGTCPEAPTDECKPVKWCALSHHER	L
1	gi|110590597	Chain A, Apo-Human Serum Transferrin (Non-Glycosylated)	2511	74643	155	102	80	61	75.7	2187	1	1	0	795.636	3178.51	4	3178.51	0.0032	2	30.69	0.0016	K	HSTIFENLANKADRDQYELLCLDNTR	K
1	gi|110590597	Chain A, Apo-Human Serum Transferrin (Non-Glycosylated)	2511	74643	155	102	80	61	75.7	2188	1	1	0	1060.51	3178.52	3	3178.51	0.007	2	32.48	0.18	K	HSTIFENLANKADRDQYELLCLDNTR	K
1	gi|110590597	Chain A, Apo-Human Serum Transferrin (Non-Glycosylated)	2511	74643	155	102	80	61	75.7	2205	1	1	0	806.387	3221.52	4	3221.52	0.0034	2	43.92	0.00022	K	HSTIFENLANKADRDQYELLCLDNTR	K
1	gi|110590597	Chain A, Apo-Human Serum Transferrin (Non-Glycosylated)	2511	74643	155	102	80	61	75.7	2206	1	1	0	1074.85	3221.52	3	3221.52	0.0077	2	9.01	0.14	K	HSTIFENLANKADRDQYELLCLDNTR	K
1	gi|110590597	Chain A, Apo-Human Serum Transferrin (Non-Glycosylated)	2511	74643	155	102	80	61	75.7	2315	1	1	0	989.26	3953.01	4	3953.01	0.0027	0	61.54	1.7e-06	R	AIAANEADAVTLDAGLVYDAYLAPNNLKPVVAEFYGSK	E
1	gi|110590597	Chain A, Apo-Human Serum Transferrin (Non-Glycosylated)	2511	74643	155	102	80	61	75.7	2316	1	1	0	1318.68	3953.02	3	3953.01	0.006	0	45.29	5.7e-05	R	AIAANEADAVTLDAGLVYDAYLAPNNLKPVVAEFYGSK	E
1	gi|110590597	Chain A, Apo-Human Serum Transferrin (Non-Glycosylated)	2511	74643	155	102	80	61	75.7	2317	1	1	0	1333.01	3996.02	3	3996.02	0.0001	0	47.34	3.6e-05	R	AIAANEADAVTLDAGLVYDAYLAPNNLKPVVAEFYGSK	E
1	gi|110590597	Chain A, Apo-Human Serum Transferrin (Non-Glycosylated)	2511	74643	155	102	80	61	75.7	2318	1	1	0	1000.01	3996.02	4	3996.02	0.0033	0	44.58	0.0003	R	AIAANEADAVTLDAGLVYDAYLAPNNLKPVVAEFYGSK	E
2	gi|110590599	Chain A, Apo-Human Serum Transferrin (Glycosylated)	2509	74821	154	102	78	61	78.8	10	3	0	0	706.39	705.383	1	705.381	0.0022	0	19.57	1.2	K	DLLFR	D
2	gi|110590599	Chain A, Apo-Human Serum Transferrin (Glycosylated)	2509	74821	154	102	78	61	78.8	72	1	0	0	459.228	916.441	2	916.44	0.0008	0	10.26	0.43	K	DSAHGFLK	V
2	gi|110590599	Chain A, Apo-Human Serum Transferrin (Glycosylated)	2509	74821	154	102	78	61	78.8	111	2	0	0	489.748	977.481	2	977.482	-0.0006	0	17.82	1.1	K	DGAGDVAFVK	H
2	gi|110590599	Chain A, Apo-Human Serum Transferrin (Glycosylated)	2509	74821	154	102	78	61	78.8	123	1	0	0	499.243	996.47	2	996.47	0.0006	0	23.33	0.051	K	ASYLDCIR	A
2	gi|110590599	Chain A, Apo-Human Serum Transferrin (Glycosylated)	2509	74821	154	102	78	61	78.8	126	5	0	0	500.753	999.492	2	999.491	0.0008	0	3.53	1.1	K	YLGEEYVK	A
2	gi|110590599	Chain A, Apo-Human Serum Transferrin (Glycosylated)	2509	74821	154	102	78	61	78.8	223	1	0	0	563.291	1124.57	2	1124.56	0.002	1	31.63	0.062	K	KASYLDCIR	A
2	gi|110590599	Chain A, Apo-Human Serum Transferrin (Glycosylated)	2509	74821	154	102	78	61	78.8	256	1	0	0	576.308	1150.6	2	1150.6	0.0036	1	38.44	0.048	R	SETKDLLFR	D
2	gi|110590599	Chain A, Apo-Human Serum Transferrin (Glycosylated)	2509	74821	154	102	78	61	78.8	276	1	0	0	584.793	1167.57	2	1167.57	0.0014	1	46.3	0.0013	K	KASYLDCIR	A
2	gi|110590599	Chain A, Apo-Human Serum Transferrin (Glycosylated)	2509	74821	154	102	78	61	78.8	299	1	0	1	598.281	1194.55	2	1194.55	0.0021	0	53.06	0.00021	K	DSGFQMNQLR	G
2	gi|110590599	Chain A, Apo-Human Serum Transferrin (Glycosylated)	2509	74821	154	102	78	61	78.8	321	1	0	0	606.319	1210.62	2	1210.62	-0.0008	1	25.67	0.17	K	EACVHKILR	Q
2	gi|110590599	Chain A, Apo-Human Serum Transferrin (Glycosylated)	2509	74821	154	102	78	61	78.8	364	1	0	0	413.52	1237.54	3	1237.54	-0.0026	0	24.82	0.021	K	WCALSHHER	L
2	gi|110590599	Chain A, Apo-Human Serum Transferrin (Glycosylated)	2509	74821	154	102	78	61	78.8	380	1	0	0	625.308	1248.6	2	1248.6	0.0032	0	49.02	0.0026	K	SASDLTWDNLK	G
2	gi|110590599	Chain A, Apo-Human Serum Transferrin (Glycosylated)	2509	74821	154	102	78	61	78.8	407	1	0	0	637.333	1272.65	2	1272.65	0.0058	0	66.22	2.2e-06	K	HSTIFENLANK	A
2	gi|110590599	Chain A, Apo-Human Serum Transferrin (Glycosylated)	2509	74821	154	102	78	61	78.8	418	1	0	0	638.821	1275.63	2	1275.62	0.0035	0	42.75	0.0011	K	EFQLFSSPHGK	D
2	gi|110590599	Chain A, Apo-Human Serum Transferrin (Glycosylated)	2509	74821	154	102	78	61	78.8	426	1	0	0	640.783	1279.55	2	1279.55	0.0013	0	29.83	0.013	K	CDEWSVNSVGK	I
2	gi|110590599	Chain A, Apo-Human Serum Transferrin (Glycosylated)	2509	74821	154	102	78	61	78.8	469	1	0	0	658.835	1315.65	2	1315.65	0.0024	0	50.87	5e-05	K	HSTIFENLANK	A
2	gi|110590599	Chain A, Apo-Human Serum Transferrin (Glycosylated)	2509	74821	154	102	78	61	78.8	472	1	0	0	660.324	1318.63	2	1318.63	0.0034	0	48.26	0.00068	K	EFQLFSSPHGK	D
2	gi|110590599	Chain A, Apo-Human Serum Transferrin (Glycosylated)	2509	74821	154	102	78	61	78.8	520	1	0	0	677.845	1353.67	2	1353.62	0.0512	0	32.53	0.0083	K	DYELLCLDGTR	K
2	gi|110590599	Chain A, Apo-Human Serum Transferrin (Glycosylated)	2509	74821	154	102	78	61	78.8	526	1	0	0	680.803	1359.59	2	1359.59	0.0033	0	38.11	0.0017	R	WCAVSEHEATK	C
2	gi|110590599	Chain A, Apo-Human Serum Transferrin (Glycosylated)	2509	74821	154	102	78	61	78.8	533	1	0	1	683.835	1365.66	2	1365.65	0.0095	1	60.88	2.3e-05	K	KDSGFQMNQLR	G
2	gi|110590599	Chain A, Apo-Human Serum Transferrin (Glycosylated)	2509	74821	154	102	78	61	78.8	570	1	0	0	704.37	1406.73	2	1406.72	0.0035	1	42.57	0.057	R	CLVEKGDVAFVK	H
2	gi|110590599	Chain A, Apo-Human Serum Transferrin (Glycosylated)	2509	74821	154	102	78	61	78.8	571	1	0	0	704.371	1406.73	2	1406.72	0.0045	1	7.52	0.53	R	CLVEKGDVAFVK	H
2	gi|110590599	Chain A, Apo-Human Serum Transferrin (Glycosylated)	2509	74821	154	102	78	61	78.8	575	1	0	0	705.371	1408.73	2	1408.72	0.0061	1	16.48	0.085	K	DSAHGFLKVPPR	M
2	gi|110590599	Chain A, Apo-Human Serum Transferrin (Glycosylated)	2509	74821	154	102	78	61	78.8	583	1	0	0	471.253	1410.74	3	1410.74	-0.0018	2	18.54	0.057	K	DKEACVHKILR	Q
2	gi|110590599	Chain A, Apo-Human Serum Transferrin (Glycosylated)	2509	74821	154	102	78	61	78.8	588	1	0	0	708.365	1414.71	2	1414.71	0.002	0	76.46	6.1e-05	K	SVIPSDGPSVACVK	K
2	gi|110590599	Chain A, Apo-Human Serum Transferrin (Glycosylated)	2509	74821	154	102	78	61	78.8	596	1	0	0	710.853	1419.69	2	1419.7	-0.0073	1	33.95	0.0053	K	KSASDLTWDNLK	G
2	gi|110590599	Chain A, Apo-Human Serum Transferrin (Glycosylated)	2509	74821	154	102	78	61	78.8	628	1	0	0	725.869	1449.72	2	1449.73	-0.0058	1	29.48	0.0072	R	CLVEKGDVAFVK	H
2	gi|110590599	Chain A, Apo-Human Serum Transferrin (Glycosylated)	2509	74821	154	102	78	61	78.8	632	1	0	0	727.881	1453.75	2	1453.75	0.0015	2	37.55	0.43	K	DKEACVHKILR	Q
2	gi|110590599	Chain A, Apo-Human Serum Transferrin (Glycosylated)	2509	74821	154	102	78	61	78.8	647	1	0	0	733.364	1464.71	2	1464.7	0.0093	1	31.19	0.003	K	CLKDGAGDVAFVK	H
2	gi|110590599	Chain A, Apo-Human Serum Transferrin (Glycosylated)	2509	74821	154	102	78	61	78.8	662	1	0	0	739.368	1476.72	2	1476.72	0.001	1	41.53	0.2	K	SASDLTWDNLKGK	K
2	gi|110590599	Chain A, Apo-Human Serum Transferrin (Glycosylated)	2509	74821	154	102	78	61	78.8	665	1	0	1	739.872	1477.73	2	1477.73	0.0011	0	76.93	9.6e-08	K	MYLGYEYVTAIR	N
2	gi|110590599	Chain A, Apo-Human Serum Transferrin (Glycosylated)	2509	74821	154	102	78	61	78.8	666	1	0	1	739.872	1477.73	2	1477.73	0.0015	0	68.41	1e-06	K	MYLGYEYVTAIR	N
2	gi|110590599	Chain A, Apo-Human Serum Transferrin (Glycosylated)	2509	74821	154	102	78	61	78.8	672	1	0	0	743.361	1484.71	2	1484.7	0.0039	1	51.57	0.018	R	DDTVCLAKLHDR	N
2	gi|110590599	Chain A, Apo-Human Serum Transferrin (Glycosylated)	2509	74821	154	102	78	61	78.8	680	1	0	0	497.925	1490.75	3	1490.75	-0.0001	1	2.08	0.64	K	SKEFQLFSSPHGK	D
2	gi|110590599	Chain A, Apo-Human Serum Transferrin (Glycosylated)	2509	74821	154	102	78	61	78.8	685	1	0	1	747.867	1493.72	2	1493.72	-0.0024	0	46.76	5.5e-05	K	MYLGYEYVTAIR	N
2	gi|110590599	Chain A, Apo-Human Serum Transferrin (Glycosylated)	2509	74821	154	102	78	61	78.8	691	1	0	0	749.384	1496.75	2	1496.75	0.0011	2	36.35	0.0025	K	DKEACVHKILR	Q
2	gi|110590599	Chain A, Apo-Human Serum Transferrin (Glycosylated)	2509	74821	154	102	78	61	78.8	726	1	0	0	761.372	1520.73	2	1520.73	0.0009	1	78.26	7.2e-07	R	LKCDEWSVNSVGK	I
2	gi|110590599	Chain A, Apo-Human Serum Transferrin (Glycosylated)	2509	74821	154	102	78	61	78.8	727	1	0	1	761.373	1520.73	2	1520.73	-0.0011	0	37.75	0.002	K	MYLGYEYVTAIR	N
2	gi|110590599	Chain A, Apo-Human Serum Transferrin (Glycosylated)	2509	74821	154	102	78	61	78.8	733	1	0	0	764.863	1527.71	2	1527.71	0.0021	1	38.93	0.0012	R	DDTVCLAKLHDR	N
2	gi|110590599	Chain A, Apo-Human Serum Transferrin (Glycosylated)	2509	74821	154	102	78	61	78.8	737	1	0	0	766.35	1530.69	2	1530.68	0.0048	0	79.28	1.4e-07	K	CSTSSLLEACTFR	R
2	gi|110590599	Chain A, Apo-Human Serum Transferrin (Glycosylated)	2509	74821	154	102	78	61	78.8	739	1	0	0	767.407	1532.8	2	1532.8	-0.0003	1	38.34	0.095	K	DLLFKDSAHGFLK	V
2	gi|110590599	Chain A, Apo-Human Serum Transferrin (Glycosylated)	2509	74821	154	102	78	61	78.8	742	1	0	0	767.887	1533.76	2	1533.76	0.0019	1	53.54	0.00072	K	SKEFQLFSSPHGK	D
2	gi|110590599	Chain A, Apo-Human Serum Transferrin (Glycosylated)	2509	74821	154	102	78	61	78.8	749	1	0	0	770.358	1538.7	2	1538.7	-0.0016	0	64.17	1.9e-05	R	DQYELLCLDNTR	K
2	gi|110590599	Chain A, Apo-Human Serum Transferrin (Glycosylated)	2509	74821	154	102	78	61	78.8	786	1	0	0	782.875	1563.74	2	1563.74	0.0005	1	78.15	4e-07	R	LKCDEWSVNSVGK	I
2	gi|110590599	Chain A, Apo-Human Serum Transferrin (Glycosylated)	2509	74821	154	102	78	61	78.8	789	1	0	0	783.403	1564.79	2	1564.79	-0.0011	1	41.01	0.0041	K	DLLFRDDTVCLAK	L
2	gi|110590599	Chain A, Apo-Human Serum Transferrin (Glycosylated)	2509	74821	154	102	78	61	78.8	802	1	0	0	787.851	1573.69	2	1573.69	0.0018	0	66.83	5e-06	K	CSTSSLLEACTFR	R
2	gi|110590599	Chain A, Apo-Human Serum Transferrin (Glycosylated)	2509	74821	154	102	78	61	78.8	805	1	0	0	788.908	1575.8	2	1575.8	-0.0037	1	25.08	0.045	K	DLLFKDSAHGFLK	V
2	gi|110590599	Chain A, Apo-Human Serum Transferrin (Glycosylated)	2509	74821	154	102	78	61	78.8	810	1	0	0	789.335	1576.65	2	1576.65	0.0044	0	102	1.2e-09	R	FDEFFSEGCAPGSK	K
2	gi|110590599	Chain A, Apo-Human Serum Transferrin (Glycosylated)	2509	74821	154	102	78	61	78.8	811	1	0	0	789.391	1576.77	2	1576.76	0.0043	1	53.38	0.00011	K	SKEFQLFSSPHGK	D
2	gi|110590599	Chain A, Apo-Human Serum Transferrin (Glycosylated)	2509	74821	154	102	78	61	78.8	813	1	0	1	789.411	1576.81	2	1576.81	0.0007	0	57.73	3.7e-05	R	TAGWNIPMGLLYNK	I
2	gi|110590599	Chain A, Apo-Human Serum Transferrin (Glycosylated)	2509	74821	154	102	78	61	78.8	819	1	0	0	529.596	1585.77	3	1585.77	-0.0012	0	76.27	3.1e-07	R	KPVEEYANCHLAR	A
2	gi|110590599	Chain A, Apo-Human Serum Transferrin (Glycosylated)	2509	74821	154	102	78	61	78.8	820	1	0	0	793.915	1585.82	2	1585.81	0.0026	1	35.81	0.7	K	SVIPSDGPSVACVKK	A
2	gi|110590599	Chain A, Apo-Human Serum Transferrin (Glycosylated)	2509	74821	154	102	78	61	78.8	851	1	0	0	804.378	1606.74	2	1606.74	-0.0003	1	43.29	0.00029	R	LKCDEWSVNSVGK	I
2	gi|110590599	Chain A, Apo-Human Serum Transferrin (Glycosylated)	2509	74821	154	102	78	61	78.8	874	1	0	0	810.835	1619.65	2	1619.66	-0.0016	0	39.42	0.00029	R	FDEFFSEGCAPGSK	K
2	gi|110590599	Chain A, Apo-Human Serum Transferrin (Glycosylated)	2509	74821	154	102	78	61	78.8	889	1	0	0	815.393	1628.77	2	1628.77	-0.0022	0	72.88	7.8e-07	R	KPVEEYANCHLAR	A
2	gi|110590599	Chain A, Apo-Human Serum Transferrin (Glycosylated)	2509	74821	154	102	78	61	78.8	890	1	0	0	543.931	1628.77	3	1628.77	-0.0005	0	50.69	5.5e-05	R	KPVEEYANCHLAR	A
2	gi|110590599	Chain A, Apo-Human Serum Transferrin (Glycosylated)	2509	74821	154	102	78	61	78.8	891	1	0	0	543.932	1628.77	3	1628.77	-0.0002	0	58.59	1.9e-05	R	KPVEEYANCHLAR	A
2	gi|110590599	Chain A, Apo-Human Serum Transferrin (Glycosylated)	2509	74821	154	102	78	61	78.8	892	1	0	0	815.411	1628.81	2	1628.81	-0.0004	0	53.5	5.5e-05	K	EDPQTFYYAVAVVK	K
2	gi|110590599	Chain A, Apo-Human Serum Transferrin (Glycosylated)	2509	74821	154	102	78	61	78.8	918	1	0	0	824.919	1647.82	2	1647.82	0.002	2	10.62	0.54	K	SASDLTWDNLKGKK	S
2	gi|110590599	Chain A, Apo-Human Serum Transferrin (Glycosylated)	2509	74821	154	102	78	61	78.8	921	1	0	0	827.433	1652.85	2	1652.85	0.0003	1	43.77	0.1	K	YLGEEYVKAVGNLR	K
2	gi|110590599	Chain A, Apo-Human Serum Transferrin (Glycosylated)	2509	74821	154	102	78	61	78.8	928	1	0	0	829.915	1657.82	2	1657.82	-0.002	1	63.28	8.7e-05	K	HSTIFENLANKADR	D
2	gi|110590599	Chain A, Apo-Human Serum Transferrin (Glycosylated)	2509	74821	154	102	78	61	78.8	948	1	0	0	836.898	1671.78	2	1671.78	0.0021	0	52.91	9.8e-05	R	KPVEEYANCHLAR	A
2	gi|110590599	Chain A, Apo-Human Serum Transferrin (Glycosylated)	2509	74821	154	102	78	61	78.8	949	1	0	0	836.913	1671.81	2	1671.81	-0.004	0	30.47	0.0014	K	EDPQTFYYAVAVVK	K
2	gi|110590599	Chain A, Apo-Human Serum Transferrin (Glycosylated)	2509	74821	154	102	78	61	78.8	963	1	0	0	839.904	1677.79	2	1677.79	0.0047	1	40.27	0.026	R	NTYEKYLGEEYVK	A
2	gi|110590599	Chain A, Apo-Human Serum Transferrin (Glycosylated)	2509	74821	154	102	78	61	78.8	971	1	0	0	563.955	1688.84	3	1688.84	0	0	47.31	0.00016	K	DCHLAQVPSHTVVAR	S
2	gi|110590599	Chain A, Apo-Human Serum Transferrin (Glycosylated)	2509	74821	154	102	78	61	78.8	983	1	0	0	848.935	1695.86	2	1695.86	-0.003	1	37.58	0.00069	K	YLGEEYVKAVGNLR	K
2	gi|110590599	Chain A, Apo-Human Serum Transferrin (Glycosylated)	2509	74821	154	102	78	61	78.8	988	2	0	0	851.418	1700.82	2	1700.82	-0.001	1	6.38	0.72	K	HSTIFENLANKADR	D
2	gi|110590599	Chain A, Apo-Human Serum Transferrin (Glycosylated)	2509	74821	154	102	78	61	78.8	989	1	0	0	851.899	1701.78	2	1701.78	0.0014	1	82.13	4.4e-08	R	KCSTSSLLEACTFR	R
2	gi|110590599	Chain A, Apo-Human Serum Transferrin (Glycosylated)	2509	74821	154	102	78	61	78.8	990	1	0	0	851.899	1701.78	2	1701.78	0.003	1	29.95	0.0016	R	KCSTSSLLEACTFR	R
2	gi|110590599	Chain A, Apo-Human Serum Transferrin (Glycosylated)	2509	74821	154	102	78	61	78.8	998	1	0	1	853.888	1705.76	2	1705.76	0.0027	0	74.01	1.4e-06	K	LCMGSGLNLCEPNNK	E
2	gi|110590599	Chain A, Apo-Human Serum Transferrin (Glycosylated)	2509	74821	154	102	78	61	78.8	1027	1	0	0	863.389	1724.76	2	1724.76	0.003	0	70.91	5.3e-06	K	IECVSAETTEDCIAK	I
2	gi|110590599	Chain A, Apo-Human Serum Transferrin (Glycosylated)	2509	74821	154	102	78	61	78.8	1052	1	0	0	874.885	1747.75	2	1747.75	0.0033	1	33.97	0.0031	R	FDEFFSEGCAPGSKK	D
2	gi|110590599	Chain A, Apo-Human Serum Transferrin (Glycosylated)	2509	74821	154	102	78	61	78.8	1053	1	0	1	875.389	1748.76	2	1748.76	0.0001	0	27.9	0.0024	K	LCMGSGLNLCEPNNK	E
2	gi|110590599	Chain A, Apo-Human Serum Transferrin (Glycosylated)	2509	74821	154	102	78	61	78.8	1075	1	0	0	884.892	1767.77	2	1767.77	0.0039	0	26.38	0.0034	K	IECVSAETTEDCIAK	I
2	gi|110590599	Chain A, Apo-Human Serum Transferrin (Glycosylated)	2509	74821	154	102	78	61	78.8	1119	1	0	0	900.961	1799.91	2	1799.91	-0.0023	1	9.37	0.61	K	EDPQTFYYAVAVVKK	D
2	gi|110590599	Chain A, Apo-Human Serum Transferrin (Glycosylated)	2509	74821	154	102	78	61	78.8	1208	1	0	0	930.91	1859.8	2	1859.8	0.0017	0	40.62	0.0003	R	EGTCPEAPTDECKPVK	W
2	gi|110590599	Chain A, Apo-Human Serum Transferrin (Glycosylated)	2509	74821	154	102	78	61	78.8	1212	1	0	0	932.453	1862.89	2	1862.89	0.0005	2	41.77	0.00012	K	DKSKEFQLFSSPHGK	D
2	gi|110590599	Chain A, Apo-Human Serum Transferrin (Glycosylated)	2509	74821	154	102	78	61	78.8	1244	1	0	0	941.441	1880.87	2	1880.87	-0.001	1	64.6	5.8e-06	K	ADRDQYELLCLDNTR	K
2	gi|110590599	Chain A, Apo-Human Serum Transferrin (Glycosylated)	2509	74821	154	102	78	61	78.8	1301	1	0	0	642.302	1923.88	3	1923.87	0.01	1	18.84	0.085	K	ADRDQYELLCLDNTR	K
2	gi|110590599	Chain A, Apo-Human Serum Transferrin (Glycosylated)	2509	74821	154	102	78	61	78.8	1302	1	0	0	962.952	1923.89	2	1923.87	0.015	1	27.09	0.011	K	ADRDQYELLCLDNTR	K
2	gi|110590599	Chain A, Apo-Human Serum Transferrin (Glycosylated)	2509	74821	154	102	78	61	78.8	1312	1	0	0	646.004	1934.99	3	1934.99	0.0017	1	16.29	0.18	K	EFQLFSSPHGKDLLFK	D
2	gi|110590599	Chain A, Apo-Human Serum Transferrin (Glycosylated)	2509	74821	154	102	78	61	78.8	1313	1	0	0	968.503	1934.99	2	1934.99	0.0028	1	21.99	0.01	K	EFQLFSSPHGKDLLFK	D
2	gi|110590599	Chain A, Apo-Human Serum Transferrin (Glycosylated)	2509	74821	154	102	78	61	78.8	1339	1	0	0	976.974	1951.93	2	1951.93	0.0017	1	79.09	3e-05	K	NLNEKDYELLCLDGTR	K
2	gi|110590599	Chain A, Apo-Human Serum Transferrin (Glycosylated)	2509	74821	154	102	78	61	78.8	1340	1	0	0	651.652	1951.93	3	1951.93	0.0039	1	37.06	0.018	K	NLNEKDYELLCLDGTR	K
2	gi|110590599	Chain A, Apo-Human Serum Transferrin (Glycosylated)	2509	74821	154	102	78	61	78.8	1354	1	0	0	985.001	1967.99	2	1967.98	0.0059	1	44.68	0.00015	K	GDVAFVKHQTVPQNTGGK	N
2	gi|110590599	Chain A, Apo-Human Serum Transferrin (Glycosylated)	2509	74821	154	102	78	61	78.8	1361	1	0	0	990.007	1978	2	1977.99	0.0044	1	14.54	0.058	K	EFQLFSSPHGKDLLFK	D
2	gi|110590599	Chain A, Apo-Human Serum Transferrin (Glycosylated)	2509	74821	154	102	78	61	78.8	1378	1	0	0	998.479	1994.94	2	1994.94	0.0069	1	66.07	0.00069	K	NLNEKDYELLCLDGTR	K
2	gi|110590599	Chain A, Apo-Human Serum Transferrin (Glycosylated)	2509	74821	154	102	78	61	78.8	1386	1	0	1	1006.98	2011.94	2	2011.95	-0.0005	1	52.34	1.3e-05	R	DHMKSVIPSDGPSVACVK	K
2	gi|110590599	Chain A, Apo-Human Serum Transferrin (Glycosylated)	2509	74821	154	102	78	61	78.8	1401	1	0	0	680.302	2037.88	3	2037.88	0.0059	1	77.23	1.4e-07	R	WCAVSEHEATKCQSFR	D
2	gi|110590599	Chain A, Apo-Human Serum Transferrin (Glycosylated)	2509	74821	154	102	78	61	78.8	1432	1	0	0	690.683	2069.03	3	2069.02	0.0045	0	29.92	0.0016	K	EDLIWELLNQAQEHFGK	D
2	gi|110590599	Chain A, Apo-Human Serum Transferrin (Glycosylated)	2509	74821	154	102	78	61	78.8	1433	1	0	0	1035.52	2069.03	2	2069.02	0.0047	0	46.26	0.00075	K	EDLIWELLNQAQEHFGK	D
2	gi|110590599	Chain A, Apo-Human Serum Transferrin (Glycosylated)	2509	74821	154	102	78	61	78.8	1438	1	0	0	1036.47	2070.92	2	2070.92	0.0008	0	41.21	0.00047	K	SDNCEDTPEAGYFAVAVVK	K
2	gi|110590599	Chain A, Apo-Human Serum Transferrin (Glycosylated)	2509	74821	154	102	78	61	78.8	1450	1	0	0	1041.45	2080.88	2	2080.88	-0.0025	1	8.68	0.25	R	WCAVSEHEATKCQSFR	D
2	gi|110590599	Chain A, Apo-Human Serum Transferrin (Glycosylated)	2509	74821	154	102	78	61	78.8	1475	1	0	0	1049.02	2096.02	2	2096.02	0.001	2	7.9	0.37	R	SETKDLLFRDDTVCLAK	L
2	gi|110590599	Chain A, Apo-Human Serum Transferrin (Glycosylated)	2509	74821	154	102	78	61	78.8	1537	1	0	1	1080.02	2158.02	2	2158.01	0.0112	0	29.56	0.0021	K	IMNGEADAMSLDGGFVYIAGK	C
2	gi|110590599	Chain A, Apo-Human Serum Transferrin (Glycosylated)	2509	74821	154	102	78	61	78.8	1549	1	0	0	724.372	2170.09	3	2170.09	0.0064	0	71.3	4.4e-06	R	SAGWNIPIGLLYCDLPEPR	K
2	gi|110590599	Chain A, Apo-Human Serum Transferrin (Glycosylated)	2509	74821	154	102	78	61	78.8	1550	1	0	0	1086.06	2170.1	2	2170.09	0.009	0	60.29	1.8e-05	R	SAGWNIPIGLLYCDLPEPR	K
2	gi|110590599	Chain A, Apo-Human Serum Transferrin (Glycosylated)	2509	74821	154	102	78	61	78.8	1556	1	0	0	725.032	2172.08	3	2172.07	0.0005	2	44.23	0.00032	K	DLLFRDDTVCLAKLHDR	N
2	gi|110590599	Chain A, Apo-Human Serum Transferrin (Glycosylated)	2509	74821	154	102	78	61	78.8	1567	1	0	0	732.049	2193.13	3	2193.12	0.0039	2	4.39	0.55	K	SKEFQLFSSPHGKDLLFK	D
2	gi|110590599	Chain A, Apo-Human Serum Transferrin (Glycosylated)	2509	74821	154	102	78	61	78.8	1571	1	0	1	1101.52	2201.02	2	2201.01	0.0042	0	13.49	0.066	K	IMNGEADAMSLDGGFVYIAGK	C
2	gi|110590599	Chain A, Apo-Human Serum Transferrin (Glycosylated)	2509	74821	154	102	78	61	78.8	1586	1	0	0	1107.56	2213.1	2	2213.09	0.0033	0	45.38	0.00015	R	SAGWNIPIGLLYCDLPEPR	K
2	gi|110590599	Chain A, Apo-Human Serum Transferrin (Glycosylated)	2509	74821	154	102	78	61	78.8	1643	1	0	0	759.382	2275.12	3	2275.12	0	1	42.59	0.13	K	DGAGDVAFVKHSTIFENLANK	A
2	gi|110590599	Chain A, Apo-Human Serum Transferrin (Glycosylated)	2509	74821	154	102	78	61	78.8	1644	1	0	0	1138.57	2275.13	2	2275.12	0.0041	1	45.29	0.0072	K	DGAGDVAFVKHSTIFENLANK	A
2	gi|110590599	Chain A, Apo-Human Serum Transferrin (Glycosylated)	2509	74821	154	102	78	61	78.8	1662	1	0	1	767.719	2300.13	3	2300.13	0.0039	1	44.05	0.00035	R	TAGWNIPMGLLYNKINHCR	F
2	gi|110590599	Chain A, Apo-Human Serum Transferrin (Glycosylated)	2509	74821	154	102	78	61	78.8	1663	1	0	1	1151.07	2300.13	2	2300.13	0.004	1	44.79	0.00056	R	TAGWNIPMGLLYNKINHCR	F
2	gi|110590599	Chain A, Apo-Human Serum Transferrin (Glycosylated)	2509	74821	154	102	78	61	78.8	1686	1	0	0	773.718	2318.13	3	2318.13	0.0043	1	24.86	0.028	K	DGAGDVAFVKHSTIFENLANK	A
2	gi|110590599	Chain A, Apo-Human Serum Transferrin (Glycosylated)	2509	74821	154	102	78	61	78.8	1687	1	0	0	1160.07	2318.13	2	2318.13	0.0053	1	34.57	0.00089	K	DGAGDVAFVKHSTIFENLANK	A
2	gi|110590599	Chain A, Apo-Human Serum Transferrin (Glycosylated)	2509	74821	154	102	78	61	78.8	1693	1	0	0	778.056	2331.15	3	2331.15	-0.0042	2	16	0.27	R	NTYEKYLGEEYVKAVGNLR	K
2	gi|110590599	Chain A, Apo-Human Serum Transferrin (Glycosylated)	2509	74821	154	102	78	61	78.8	1694	1	0	0	1166.58	2331.15	2	2331.15	-0.0006	2	56.18	0.00025	R	NTYEKYLGEEYVKAVGNLR	K
2	gi|110590599	Chain A, Apo-Human Serum Transferrin (Glycosylated)	2509	74821	154	102	78	61	78.8	1701	1	0	1	782.054	2343.14	3	2343.14	0.0037	1	14.7	0.057	R	TAGWNIPMGLLYNKINHCR	F
2	gi|110590599	Chain A, Apo-Human Serum Transferrin (Glycosylated)	2509	74821	154	102	78	61	78.8	1702	1	0	1	1172.58	2343.14	2	2343.14	0.005	1	7.96	0.18	R	TAGWNIPMGLLYNKINHCR	F
2	gi|110590599	Chain A, Apo-Human Serum Transferrin (Glycosylated)	2509	74821	154	102	78	61	78.8	1710	1	0	0	786.055	2355.14	3	2355.15	-0.0066	1	9.07	0.18	K	EDLIWELLNQAQEHFGKDK	S
2	gi|110590599	Chain A, Apo-Human Serum Transferrin (Glycosylated)	2509	74821	154	102	78	61	78.8	1711	1	0	0	1178.58	2355.15	2	2355.15	0.0022	1	23.19	0.0088	K	EDLIWELLNQAQEHFGKDK	S
2	gi|110590599	Chain A, Apo-Human Serum Transferrin (Glycosylated)	2509	74821	154	102	78	61	78.8	1739	1	0	0	800.393	2398.16	3	2398.16	0.0016	1	2.23	0.9	K	EDLIWELLNQAQEHFGKDK	S
2	gi|110590599	Chain A, Apo-Human Serum Transferrin (Glycosylated)	2509	74821	154	102	78	61	78.8	1740	1	0	0	1200.09	2398.16	2	2398.16	0.0019	1	4.19	0.57	K	EDLIWELLNQAQEHFGKDK	S
2	gi|110590599	Chain A, Apo-Human Serum Transferrin (Glycosylated)	2509	74821	154	102	78	61	78.8	1825	1	0	1	844.085	2529.23	3	2529.23	0.0013	1	42.4	0.00073	R	SMGGKEDLIWELLNQAQEHFGK	D
2	gi|110590599	Chain A, Apo-Human Serum Transferrin (Glycosylated)	2509	74821	154	102	78	61	78.8	1847	1	0	1	637.315	2545.23	4	2545.23	0.0034	1	1.27	0.76	R	SMGGKEDLIWELLNQAQEHFGK	D
2	gi|110590599	Chain A, Apo-Human Serum Transferrin (Glycosylated)	2509	74821	154	102	78	61	78.8	1852	1	0	0	638.08	2548.29	4	2548.29	0.0033	1	60.71	2.5e-06	R	KPVDEYKDCHLAQVPSHTVVAR	S
2	gi|110590599	Chain A, Apo-Human Serum Transferrin (Glycosylated)	2509	74821	154	102	78	61	78.8	1869	1	0	1	858.419	2572.23	3	2572.24	-0.0037	1	5.46	0.49	R	SMGGKEDLIWELLNQAQEHFGK	D
2	gi|110590599	Chain A, Apo-Human Serum Transferrin (Glycosylated)	2509	74821	154	102	78	61	78.8	1870	1	0	1	1287.13	2572.24	2	2572.24	-0.0003	1	25.58	0.004	R	SMGGKEDLIWELLNQAQEHFGK	D
2	gi|110590599	Chain A, Apo-Human Serum Transferrin (Glycosylated)	2509	74821	154	102	78	61	78.8	1871	1	0	1	858.421	2572.24	3	2572.24	0.0029	1	41.22	0.00027	R	SMGGKEDLIWELLNQAQEHFGK	D
2	gi|110590599	Chain A, Apo-Human Serum Transferrin (Glycosylated)	2509	74821	154	102	78	61	78.8	1872	1	0	1	1287.13	2572.24	2	2572.24	0.0053	1	33.27	0.0019	R	SMGGKEDLIWELLNQAQEHFGK	D
2	gi|110590599	Chain A, Apo-Human Serum Transferrin (Glycosylated)	2509	74821	154	102	78	61	78.8	1873	3	0	1	858.422	2572.24	3	2572.24	0.0062	1	1.62	1	R	SMGGKEDLIWELLNQAQEHFGK	D
2	gi|110590599	Chain A, Apo-Human Serum Transferrin (Glycosylated)	2509	74821	154	102	78	61	78.8	1893	1	0	1	863.752	2588.23	3	2588.23	0.0016	1	19.08	0.016	R	SMGGKEDLIWELLNQAQEHFGK	D
2	gi|110590599	Chain A, Apo-Human Serum Transferrin (Glycosylated)	2509	74821	154	102	78	61	78.8	1897	1	0	0	648.832	2591.3	4	2591.29	0.007	1	48.51	3.2e-05	R	KPVDEYKDCHLAQVPSHTVVAR	S
2	gi|110590599	Chain A, Apo-Human Serum Transferrin (Glycosylated)	2509	74821	154	102	78	61	78.8	1901	1	0	0	866.775	2597.3	3	2597.3	0.0026	2	22.78	0.36	R	CLVEKGDVAFVKHQTVPQNTGGK	N
2	gi|110590599	Chain A, Apo-Human Serum Transferrin (Glycosylated)	2509	74821	154	102	78	61	78.8	1912	1	0	0	1304.65	2607.28	2	2607.28	-0.0009	2	40.71	0.06	K	SVIPSDGPSVACVKKASYLDCIR	A
2	gi|110590599	Chain A, Apo-Human Serum Transferrin (Glycosylated)	2509	74821	154	102	78	61	78.8	1913	1	0	0	870.101	2607.28	3	2607.28	0.0033	2	27.23	0.26	K	SVIPSDGPSVACVKKASYLDCIR	A
2	gi|110590599	Chain A, Apo-Human Serum Transferrin (Glycosylated)	2509	74821	154	102	78	61	78.8	1917	1	0	1	872.753	2615.24	3	2615.24	-0.0054	1	1.61	0.74	R	SMGGKEDLIWELLNQAQEHFGK	D
2	gi|110590599	Chain A, Apo-Human Serum Transferrin (Glycosylated)	2509	74821	154	102	78	61	78.8	1934	1	0	0	879.107	2634.3	3	2634.3	0.0019	1	50.4	0.021	R	KPVDEYKDCHLAQVPSHTVVAR	S
2	gi|110590599	Chain A, Apo-Human Serum Transferrin (Glycosylated)	2509	74821	154	102	78	61	78.8	1935	1	0	0	659.582	2634.3	4	2634.3	0.0032	1	20.34	0.76	R	KPVDEYKDCHLAQVPSHTVVAR	S
2	gi|110590599	Chain A, Apo-Human Serum Transferrin (Glycosylated)	2509	74821	154	102	78	61	78.8	1949	1	0	0	886.436	2656.29	3	2656.29	-0.0013	2	4.69	0.52	K	EDLIWELLNQAQEHFGKDKSK	E
2	gi|110590599	Chain A, Apo-Human Serum Transferrin (Glycosylated)	2509	74821	154	102	78	61	78.8	1964	1	0	0	893.443	2677.31	3	2677.3	0.0056	1	59.46	2.7e-06	R	KPVDEYKDCHLAQVPSHTVVAR	S
2	gi|110590599	Chain A, Apo-Human Serum Transferrin (Glycosylated)	2509	74821	154	102	78	61	78.8	1994	1	0	0	907.453	2719.34	3	2719.34	-0.0016	2	30.28	0.51	K	CLKDGAGDVAFVKHSTIFENLANK	A
2	gi|110590599	Chain A, Apo-Human Serum Transferrin (Glycosylated)	2509	74821	154	102	78	61	78.8	2034	1	0	0	935.448	2803.32	3	2803.32	-0.0004	2	88.49	9e-09	K	NPDPWAKNLNEKDYELLCLDGTR	K
2	gi|110590599	Chain A, Apo-Human Serum Transferrin (Glycosylated)	2509	74821	154	102	78	61	78.8	2037	1	0	1	939.454	2815.34	3	2815.36	-0.0209	2	12.81	0.063	R	SMGGKEDLIWELLNQAQEHFGKDK	S
2	gi|110590599	Chain A, Apo-Human Serum Transferrin (Glycosylated)	2509	74821	154	102	78	61	78.8	2038	1	0	1	939.461	2815.36	3	2815.36	0.0019	2	20.71	0.011	R	SMGGKEDLIWELLNQAQEHFGKDK	S
2	gi|110590599	Chain A, Apo-Human Serum Transferrin (Glycosylated)	2509	74821	154	102	78	61	78.8	2039	1	0	1	704.848	2815.36	4	2815.36	0.0042	2	6.84	0.85	R	SMGGKEDLIWELLNQAQEHFGKDK	S
2	gi|110590599	Chain A, Apo-Human Serum Transferrin (Glycosylated)	2509	74821	154	102	78	61	78.8	2041	1	0	1	704.85	2815.37	4	2815.36	0.011	2	10.84	0.096	R	SMGGKEDLIWELLNQAQEHFGKDK	S
2	gi|110590599	Chain A, Apo-Human Serum Transferrin (Glycosylated)	2509	74821	154	102	78	61	78.8	2051	1	0	0	709.363	2833.42	4	2833.42	0.0025	2	21.77	0.12	K	EFQLFSSPHGKDLLFKDSAHGFLK	V
2	gi|110590599	Chain A, Apo-Human Serum Transferrin (Glycosylated)	2509	74821	154	102	78	61	78.8	2052	1	0	0	945.481	2833.42	3	2833.42	0.0036	2	25.81	0.018	K	EFQLFSSPHGKDLLFKDSAHGFLK	V
2	gi|110590599	Chain A, Apo-Human Serum Transferrin (Glycosylated)	2509	74821	154	102	78	61	78.8	2072	1	0	1	953.797	2858.37	3	2858.37	0.0032	2	33.11	0.00079	R	SMGGKEDLIWELLNQAQEHFGKDK	S
2	gi|110590599	Chain A, Apo-Human Serum Transferrin (Glycosylated)	2509	74821	154	102	78	61	78.8	2073	1	0	1	953.797	2858.37	3	2858.37	0.0041	2	26.38	0.017	R	SMGGKEDLIWELLNQAQEHFGKDK	S
2	gi|110590599	Chain A, Apo-Human Serum Transferrin (Glycosylated)	2509	74821	154	102	78	61	78.8	2083	1	0	0	959.816	2876.43	3	2876.42	0.0028	2	12.23	0.081	K	EFQLFSSPHGKDLLFKDSAHGFLK	V
2	gi|110590599	Chain A, Apo-Human Serum Transferrin (Glycosylated)	2509	74821	154	102	78	61	78.8	2143	1	0	0	760.09	3036.33	4	3036.33	0.002	1	31.9	0.62	R	EGTCPEAPTDECKPVKWCALSHHER	L
2	gi|110590599	Chain A, Apo-Human Serum Transferrin (Glycosylated)	2509	74821	154	102	78	61	78.8	2161	1	0	0	770.842	3079.34	4	3079.33	0.0046	1	27.74	0.38	R	EGTCPEAPTDECKPVKWCALSHHER	L
2	gi|110590599	Chain A, Apo-Human Serum Transferrin (Glycosylated)	2509	74821	154	102	78	61	78.8	2187	1	0	0	795.636	3178.51	4	3178.51	0.0032	2	30.69	0.0016	K	HSTIFENLANKADRDQYELLCLDNTR	K
2	gi|110590599	Chain A, Apo-Human Serum Transferrin (Glycosylated)	2509	74821	154	102	78	61	78.8	2188	1	0	0	1060.51	3178.52	3	3178.51	0.007	2	32.48	0.18	K	HSTIFENLANKADRDQYELLCLDNTR	K
2	gi|110590599	Chain A, Apo-Human Serum Transferrin (Glycosylated)	2509	74821	154	102	78	61	78.8	2205	1	0	0	806.387	3221.52	4	3221.52	0.0034	2	43.92	0.00022	K	HSTIFENLANKADRDQYELLCLDNTR	K
2	gi|110590599	Chain A, Apo-Human Serum Transferrin (Glycosylated)	2509	74821	154	102	78	61	78.8	2206	1	0	0	1074.85	3221.52	3	3221.52	0.0077	2	9.01	0.14	K	HSTIFENLANKADRDQYELLCLDNTR	K
2	gi|110590599	Chain A, Apo-Human Serum Transferrin (Glycosylated)	2509	74821	154	102	78	61	78.8	2315	1	0	0	989.26	3953.01	4	3953.01	0.0027	0	61.54	1.7e-06	R	AIAANEADAVTLDAGLVYDAYLAPNNLKPVVAEFYGSK	E
2	gi|110590599	Chain A, Apo-Human Serum Transferrin (Glycosylated)	2509	74821	154	102	78	61	78.8	2316	1	0	0	1318.68	3953.02	3	3953.01	0.006	0	45.29	5.7e-05	R	AIAANEADAVTLDAGLVYDAYLAPNNLKPVVAEFYGSK	E
2	gi|110590599	Chain A, Apo-Human Serum Transferrin (Glycosylated)	2509	74821	154	102	78	61	78.8	2317	1	0	0	1333.01	3996.02	3	3996.02	0.0001	0	47.34	3.6e-05	R	AIAANEADAVTLDAGLVYDAYLAPNNLKPVVAEFYGSK	E
2	gi|110590599	Chain A, Apo-Human Serum Transferrin (Glycosylated)	2509	74821	154	102	78	61	78.8	2318	1	0	0	1000.01	3996.02	4	3996.02	0.0033	0	44.58	0.0003	R	AIAANEADAVTLDAGLVYDAYLAPNNLKPVVAEFYGSK	E
3	gi|343197606	Chain C, Complex Between Transferrin Receptor 1 And Transferrin With Iron In The N-Lobe, Cryocooled 2	2488	76819	153	101	77	60	74.2	10	3	0	0	706.39	705.383	1	705.381	0.0022	0	19.57	1.2	K	DLLFR	D
3	gi|343197606	Chain C, Complex Between Transferrin Receptor 1 And Transferrin With Iron In The N-Lobe, Cryocooled 2	2488	76819	153	101	77	60	74.2	72	1	0	0	459.228	916.441	2	916.44	0.0008	0	10.26	0.43	K	DSAHGFLK	V
3	gi|343197606	Chain C, Complex Between Transferrin Receptor 1 And Transferrin With Iron In The N-Lobe, Cryocooled 2	2488	76819	153	101	77	60	74.2	111	2	0	0	489.748	977.481	2	977.482	-0.0006	0	17.82	1.1	K	DGAGDVAFVK	H
3	gi|343197606	Chain C, Complex Between Transferrin Receptor 1 And Transferrin With Iron In The N-Lobe, Cryocooled 2	2488	76819	153	101	77	60	74.2	123	1	0	0	499.243	996.47	2	996.47	0.0006	0	23.33	0.051	K	ASYLDCIR	A
3	gi|343197606	Chain C, Complex Between Transferrin Receptor 1 And Transferrin With Iron In The N-Lobe, Cryocooled 2	2488	76819	153	101	77	60	74.2	126	5	0	0	500.753	999.492	2	999.491	0.0008	0	3.53	1.1	K	YLGEEYVK	A
3	gi|343197606	Chain C, Complex Between Transferrin Receptor 1 And Transferrin With Iron In The N-Lobe, Cryocooled 2	2488	76819	153	101	77	60	74.2	223	1	0	0	563.291	1124.57	2	1124.56	0.002	1	31.63	0.062	K	KASYLDCIR	A
3	gi|343197606	Chain C, Complex Between Transferrin Receptor 1 And Transferrin With Iron In The N-Lobe, Cryocooled 2	2488	76819	153	101	77	60	74.2	256	1	0	0	576.308	1150.6	2	1150.6	0.0036	1	38.44	0.048	R	SETKDLLFR	D
3	gi|343197606	Chain C, Complex Between Transferrin Receptor 1 And Transferrin With Iron In The N-Lobe, Cryocooled 2	2488	76819	153	101	77	60	74.2	276	1	0	0	584.793	1167.57	2	1167.57	0.0014	1	46.3	0.0013	K	KASYLDCIR	A
3	gi|343197606	Chain C, Complex Between Transferrin Receptor 1 And Transferrin With Iron In The N-Lobe, Cryocooled 2	2488	76819	153	101	77	60	74.2	299	1	0	1	598.281	1194.55	2	1194.55	0.0021	0	53.06	0.00021	K	DSGFQMNQLR	G
3	gi|343197606	Chain C, Complex Between Transferrin Receptor 1 And Transferrin With Iron In The N-Lobe, Cryocooled 2	2488	76819	153	101	77	60	74.2	321	1	0	0	606.319	1210.62	2	1210.62	-0.0008	1	25.67	0.17	K	EACVHKILR	Q
3	gi|343197606	Chain C, Complex Between Transferrin Receptor 1 And Transferrin With Iron In The N-Lobe, Cryocooled 2	2488	76819	153	101	77	60	74.2	364	1	0	0	413.52	1237.54	3	1237.54	-0.0026	0	24.82	0.021	K	WCALSHHER	L
3	gi|343197606	Chain C, Complex Between Transferrin Receptor 1 And Transferrin With Iron In The N-Lobe, Cryocooled 2	2488	76819	153	101	77	60	74.2	380	1	0	0	625.308	1248.6	2	1248.6	0.0032	0	49.02	0.0026	K	SASDLTWDNLK	G
3	gi|343197606	Chain C, Complex Between Transferrin Receptor 1 And Transferrin With Iron In The N-Lobe, Cryocooled 2	2488	76819	153	101	77	60	74.2	407	1	0	0	637.333	1272.65	2	1272.65	0.0058	0	66.22	2.2e-06	K	HSTIFENLANK	A
3	gi|343197606	Chain C, Complex Between Transferrin Receptor 1 And Transferrin With Iron In The N-Lobe, Cryocooled 2	2488	76819	153	101	77	60	74.2	418	1	0	0	638.821	1275.63	2	1275.62	0.0035	0	42.75	0.0011	K	EFQLFSSPHGK	D
3	gi|343197606	Chain C, Complex Between Transferrin Receptor 1 And Transferrin With Iron In The N-Lobe, Cryocooled 2	2488	76819	153	101	77	60	74.2	426	1	0	0	640.783	1279.55	2	1279.55	0.0013	0	29.83	0.013	K	CDEWSVNSVGK	I
3	gi|343197606	Chain C, Complex Between Transferrin Receptor 1 And Transferrin With Iron In The N-Lobe, Cryocooled 2	2488	76819	153	101	77	60	74.2	469	1	0	0	658.835	1315.65	2	1315.65	0.0024	0	50.87	5e-05	K	HSTIFENLANK	A
3	gi|343197606	Chain C, Complex Between Transferrin Receptor 1 And Transferrin With Iron In The N-Lobe, Cryocooled 2	2488	76819	153	101	77	60	74.2	472	1	0	0	660.324	1318.63	2	1318.63	0.0034	0	48.26	0.00068	K	EFQLFSSPHGK	D
3	gi|343197606	Chain C, Complex Between Transferrin Receptor 1 And Transferrin With Iron In The N-Lobe, Cryocooled 2	2488	76819	153	101	77	60	74.2	520	1	0	0	677.845	1353.67	2	1353.62	0.0512	0	32.53	0.0083	K	DYELLCLDGTR	K
3	gi|343197606	Chain C, Complex Between Transferrin Receptor 1 And Transferrin With Iron In The N-Lobe, Cryocooled 2	2488	76819	153	101	77	60	74.2	526	1	0	0	680.803	1359.59	2	1359.59	0.0033	0	38.11	0.0017	R	WCAVSEHEATK	C
3	gi|343197606	Chain C, Complex Between Transferrin Receptor 1 And Transferrin With Iron In The N-Lobe, Cryocooled 2	2488	76819	153	101	77	60	74.2	533	1	0	1	683.835	1365.66	2	1365.65	0.0095	1	60.88	2.3e-05	K	KDSGFQMNQLR	G
3	gi|343197606	Chain C, Complex Between Transferrin Receptor 1 And Transferrin With Iron In The N-Lobe, Cryocooled 2	2488	76819	153	101	77	60	74.2	570	1	0	0	704.37	1406.73	2	1406.72	0.0035	1	42.57	0.057	R	CLVEKGDVAFVK	H
3	gi|343197606	Chain C, Complex Between Transferrin Receptor 1 And Transferrin With Iron In The N-Lobe, Cryocooled 2	2488	76819	153	101	77	60	74.2	571	1	0	0	704.371	1406.73	2	1406.72	0.0045	1	7.52	0.53	R	CLVEKGDVAFVK	H
3	gi|343197606	Chain C, Complex Between Transferrin Receptor 1 And Transferrin With Iron In The N-Lobe, Cryocooled 2	2488	76819	153	101	77	60	74.2	575	1	0	0	705.371	1408.73	2	1408.72	0.0061	1	16.48	0.085	K	DSAHGFLKVPPR	M
3	gi|343197606	Chain C, Complex Between Transferrin Receptor 1 And Transferrin With Iron In The N-Lobe, Cryocooled 2	2488	76819	153	101	77	60	74.2	583	1	0	0	471.253	1410.74	3	1410.74	-0.0018	2	18.54	0.057	K	DKEACVHKILR	Q
3	gi|343197606	Chain C, Complex Between Transferrin Receptor 1 And Transferrin With Iron In The N-Lobe, Cryocooled 2	2488	76819	153	101	77	60	74.2	588	1	0	0	708.365	1414.71	2	1414.71	0.002	0	76.46	6.1e-05	K	SVIPSDGPSVACVK	K
3	gi|343197606	Chain C, Complex Between Transferrin Receptor 1 And Transferrin With Iron In The N-Lobe, Cryocooled 2	2488	76819	153	101	77	60	74.2	596	1	0	0	710.853	1419.69	2	1419.7	-0.0073	1	33.95	0.0053	K	KSASDLTWDNLK	G
3	gi|343197606	Chain C, Complex Between Transferrin Receptor 1 And Transferrin With Iron In The N-Lobe, Cryocooled 2	2488	76819	153	101	77	60	74.2	628	1	0	0	725.869	1449.72	2	1449.73	-0.0058	1	29.48	0.0072	R	CLVEKGDVAFVK	H
3	gi|343197606	Chain C, Complex Between Transferrin Receptor 1 And Transferrin With Iron In The N-Lobe, Cryocooled 2	2488	76819	153	101	77	60	74.2	632	1	0	0	727.881	1453.75	2	1453.75	0.0015	2	37.55	0.43	K	DKEACVHKILR	Q
3	gi|343197606	Chain C, Complex Between Transferrin Receptor 1 And Transferrin With Iron In The N-Lobe, Cryocooled 2	2488	76819	153	101	77	60	74.2	647	1	0	0	733.364	1464.71	2	1464.7	0.0093	1	31.19	0.003	K	CLKDGAGDVAFVK	H
3	gi|343197606	Chain C, Complex Between Transferrin Receptor 1 And Transferrin With Iron In The N-Lobe, Cryocooled 2	2488	76819	153	101	77	60	74.2	662	1	0	0	739.368	1476.72	2	1476.72	0.001	1	41.53	0.2	K	SASDLTWDNLKGK	K
3	gi|343197606	Chain C, Complex Between Transferrin Receptor 1 And Transferrin With Iron In The N-Lobe, Cryocooled 2	2488	76819	153	101	77	60	74.2	665	1	0	1	739.872	1477.73	2	1477.73	0.0011	0	76.93	9.6e-08	K	MYLGYEYVTAIR	N
3	gi|343197606	Chain C, Complex Between Transferrin Receptor 1 And Transferrin With Iron In The N-Lobe, Cryocooled 2	2488	76819	153	101	77	60	74.2	666	1	0	1	739.872	1477.73	2	1477.73	0.0015	0	68.41	1e-06	K	MYLGYEYVTAIR	N
3	gi|343197606	Chain C, Complex Between Transferrin Receptor 1 And Transferrin With Iron In The N-Lobe, Cryocooled 2	2488	76819	153	101	77	60	74.2	672	1	0	0	743.361	1484.71	2	1484.7	0.0039	1	51.57	0.018	R	DDTVCLAKLHDR	N
3	gi|343197606	Chain C, Complex Between Transferrin Receptor 1 And Transferrin With Iron In The N-Lobe, Cryocooled 2	2488	76819	153	101	77	60	74.2	680	1	0	0	497.925	1490.75	3	1490.75	-0.0001	1	2.08	0.64	K	SKEFQLFSSPHGK	D
3	gi|343197606	Chain C, Complex Between Transferrin Receptor 1 And Transferrin With Iron In The N-Lobe, Cryocooled 2	2488	76819	153	101	77	60	74.2	685	1	0	1	747.867	1493.72	2	1493.72	-0.0024	0	46.76	5.5e-05	K	MYLGYEYVTAIR	N
3	gi|343197606	Chain C, Complex Between Transferrin Receptor 1 And Transferrin With Iron In The N-Lobe, Cryocooled 2	2488	76819	153	101	77	60	74.2	691	1	0	0	749.384	1496.75	2	1496.75	0.0011	2	36.35	0.0025	K	DKEACVHKILR	Q
3	gi|343197606	Chain C, Complex Between Transferrin Receptor 1 And Transferrin With Iron In The N-Lobe, Cryocooled 2	2488	76819	153	101	77	60	74.2	726	1	0	0	761.372	1520.73	2	1520.73	0.0009	1	78.26	7.2e-07	R	LKCDEWSVNSVGK	I
3	gi|343197606	Chain C, Complex Between Transferrin Receptor 1 And Transferrin With Iron In The N-Lobe, Cryocooled 2	2488	76819	153	101	77	60	74.2	727	1	0	1	761.373	1520.73	2	1520.73	-0.0011	0	37.75	0.002	K	MYLGYEYVTAIR	N
3	gi|343197606	Chain C, Complex Between Transferrin Receptor 1 And Transferrin With Iron In The N-Lobe, Cryocooled 2	2488	76819	153	101	77	60	74.2	733	1	0	0	764.863	1527.71	2	1527.71	0.0021	1	38.93	0.0012	R	DDTVCLAKLHDR	N
3	gi|343197606	Chain C, Complex Between Transferrin Receptor 1 And Transferrin With Iron In The N-Lobe, Cryocooled 2	2488	76819	153	101	77	60	74.2	737	1	0	0	766.35	1530.69	2	1530.68	0.0048	0	79.28	1.4e-07	K	CSTSSLLEACTFR	R
3	gi|343197606	Chain C, Complex Between Transferrin Receptor 1 And Transferrin With Iron In The N-Lobe, Cryocooled 2	2488	76819	153	101	77	60	74.2	739	1	0	0	767.407	1532.8	2	1532.8	-0.0003	1	38.34	0.095	K	DLLFKDSAHGFLK	V
3	gi|343197606	Chain C, Complex Between Transferrin Receptor 1 And Transferrin With Iron In The N-Lobe, Cryocooled 2	2488	76819	153	101	77	60	74.2	742	1	0	0	767.887	1533.76	2	1533.76	0.0019	1	53.54	0.00072	K	SKEFQLFSSPHGK	D
3	gi|343197606	Chain C, Complex Between Transferrin Receptor 1 And Transferrin With Iron In The N-Lobe, Cryocooled 2	2488	76819	153	101	77	60	74.2	749	1	0	0	770.358	1538.7	2	1538.7	-0.0016	0	64.17	1.9e-05	R	DQYELLCLDNTR	K
3	gi|343197606	Chain C, Complex Between Transferrin Receptor 1 And Transferrin With Iron In The N-Lobe, Cryocooled 2	2488	76819	153	101	77	60	74.2	786	1	0	0	782.875	1563.74	2	1563.74	0.0005	1	78.15	4e-07	R	LKCDEWSVNSVGK	I
3	gi|343197606	Chain C, Complex Between Transferrin Receptor 1 And Transferrin With Iron In The N-Lobe, Cryocooled 2	2488	76819	153	101	77	60	74.2	789	1	0	0	783.403	1564.79	2	1564.79	-0.0011	1	41.01	0.0041	K	DLLFRDDTVCLAK	L
3	gi|343197606	Chain C, Complex Between Transferrin Receptor 1 And Transferrin With Iron In The N-Lobe, Cryocooled 2	2488	76819	153	101	77	60	74.2	802	1	0	0	787.851	1573.69	2	1573.69	0.0018	0	66.83	5e-06	K	CSTSSLLEACTFR	R
3	gi|343197606	Chain C, Complex Between Transferrin Receptor 1 And Transferrin With Iron In The N-Lobe, Cryocooled 2	2488	76819	153	101	77	60	74.2	805	1	0	0	788.908	1575.8	2	1575.8	-0.0037	1	25.08	0.045	K	DLLFKDSAHGFLK	V
3	gi|343197606	Chain C, Complex Between Transferrin Receptor 1 And Transferrin With Iron In The N-Lobe, Cryocooled 2	2488	76819	153	101	77	60	74.2	810	1	0	0	789.335	1576.65	2	1576.65	0.0044	0	102	1.2e-09	R	FDEFFSEGCAPGSK	K
3	gi|343197606	Chain C, Complex Between Transferrin Receptor 1 And Transferrin With Iron In The N-Lobe, Cryocooled 2	2488	76819	153	101	77	60	74.2	811	1	0	0	789.391	1576.77	2	1576.76	0.0043	1	53.38	0.00011	K	SKEFQLFSSPHGK	D
3	gi|343197606	Chain C, Complex Between Transferrin Receptor 1 And Transferrin With Iron In The N-Lobe, Cryocooled 2	2488	76819	153	101	77	60	74.2	813	1	0	1	789.411	1576.81	2	1576.81	0.0007	0	57.73	3.7e-05	R	TAGWNIPMGLLYNK	I
3	gi|343197606	Chain C, Complex Between Transferrin Receptor 1 And Transferrin With Iron In The N-Lobe, Cryocooled 2	2488	76819	153	101	77	60	74.2	819	1	0	0	529.596	1585.77	3	1585.77	-0.0012	0	76.27	3.1e-07	R	KPVEEYANCHLAR	A
3	gi|343197606	Chain C, Complex Between Transferrin Receptor 1 And Transferrin With Iron In The N-Lobe, Cryocooled 2	2488	76819	153	101	77	60	74.2	820	1	0	0	793.915	1585.82	2	1585.81	0.0026	1	35.81	0.7	K	SVIPSDGPSVACVKK	A
3	gi|343197606	Chain C, Complex Between Transferrin Receptor 1 And Transferrin With Iron In The N-Lobe, Cryocooled 2	2488	76819	153	101	77	60	74.2	851	1	0	0	804.378	1606.74	2	1606.74	-0.0003	1	43.29	0.00029	R	LKCDEWSVNSVGK	I
3	gi|343197606	Chain C, Complex Between Transferrin Receptor 1 And Transferrin With Iron In The N-Lobe, Cryocooled 2	2488	76819	153	101	77	60	74.2	874	1	0	0	810.835	1619.65	2	1619.66	-0.0016	0	39.42	0.00029	R	FDEFFSEGCAPGSK	K
3	gi|343197606	Chain C, Complex Between Transferrin Receptor 1 And Transferrin With Iron In The N-Lobe, Cryocooled 2	2488	76819	153	101	77	60	74.2	889	1	0	0	815.393	1628.77	2	1628.77	-0.0022	0	72.88	7.8e-07	R	KPVEEYANCHLAR	A
3	gi|343197606	Chain C, Complex Between Transferrin Receptor 1 And Transferrin With Iron In The N-Lobe, Cryocooled 2	2488	76819	153	101	77	60	74.2	890	1	0	0	543.931	1628.77	3	1628.77	-0.0005	0	50.69	5.5e-05	R	KPVEEYANCHLAR	A
3	gi|343197606	Chain C, Complex Between Transferrin Receptor 1 And Transferrin With Iron In The N-Lobe, Cryocooled 2	2488	76819	153	101	77	60	74.2	891	1	0	0	543.932	1628.77	3	1628.77	-0.0002	0	58.59	1.9e-05	R	KPVEEYANCHLAR	A
3	gi|343197606	Chain C, Complex Between Transferrin Receptor 1 And Transferrin With Iron In The N-Lobe, Cryocooled 2	2488	76819	153	101	77	60	74.2	892	1	0	0	815.411	1628.81	2	1628.81	-0.0004	0	53.5	5.5e-05	K	EDPQTFYYAVAVVK	K
3	gi|343197606	Chain C, Complex Between Transferrin Receptor 1 And Transferrin With Iron In The N-Lobe, Cryocooled 2	2488	76819	153	101	77	60	74.2	918	1	0	0	824.919	1647.82	2	1647.82	0.002	2	10.62	0.54	K	SASDLTWDNLKGKK	S
3	gi|343197606	Chain C, Complex Between Transferrin Receptor 1 And Transferrin With Iron In The N-Lobe, Cryocooled 2	2488	76819	153	101	77	60	74.2	921	1	0	0	827.433	1652.85	2	1652.85	0.0003	1	43.77	0.1	K	YLGEEYVKAVGNLR	K
3	gi|343197606	Chain C, Complex Between Transferrin Receptor 1 And Transferrin With Iron In The N-Lobe, Cryocooled 2	2488	76819	153	101	77	60	74.2	928	1	0	0	829.915	1657.82	2	1657.82	-0.002	1	63.28	8.7e-05	K	HSTIFENLANKADR	D
3	gi|343197606	Chain C, Complex Between Transferrin Receptor 1 And Transferrin With Iron In The N-Lobe, Cryocooled 2	2488	76819	153	101	77	60	74.2	948	1	0	0	836.898	1671.78	2	1671.78	0.0021	0	52.91	9.8e-05	R	KPVEEYANCHLAR	A
3	gi|343197606	Chain C, Complex Between Transferrin Receptor 1 And Transferrin With Iron In The N-Lobe, Cryocooled 2	2488	76819	153	101	77	60	74.2	949	1	0	0	836.913	1671.81	2	1671.81	-0.004	0	30.47	0.0014	K	EDPQTFYYAVAVVK	K
3	gi|343197606	Chain C, Complex Between Transferrin Receptor 1 And Transferrin With Iron In The N-Lobe, Cryocooled 2	2488	76819	153	101	77	60	74.2	963	1	0	0	839.904	1677.79	2	1677.79	0.0047	1	40.27	0.026	R	NTYEKYLGEEYVK	A
3	gi|343197606	Chain C, Complex Between Transferrin Receptor 1 And Transferrin With Iron In The N-Lobe, Cryocooled 2	2488	76819	153	101	77	60	74.2	971	1	0	0	563.955	1688.84	3	1688.84	0	0	47.31	0.00016	K	DCHLAQVPSHTVVAR	S
3	gi|343197606	Chain C, Complex Between Transferrin Receptor 1 And Transferrin With Iron In The N-Lobe, Cryocooled 2	2488	76819	153	101	77	60	74.2	983	1	0	0	848.935	1695.86	2	1695.86	-0.003	1	37.58	0.00069	K	YLGEEYVKAVGNLR	K
3	gi|343197606	Chain C, Complex Between Transferrin Receptor 1 And Transferrin With Iron In The N-Lobe, Cryocooled 2	2488	76819	153	101	77	60	74.2	988	2	0	0	851.418	1700.82	2	1700.82	-0.001	1	6.38	0.72	K	HSTIFENLANKADR	D
3	gi|343197606	Chain C, Complex Between Transferrin Receptor 1 And Transferrin With Iron In The N-Lobe, Cryocooled 2	2488	76819	153	101	77	60	74.2	989	1	0	0	851.899	1701.78	2	1701.78	0.0014	1	82.13	4.4e-08	R	KCSTSSLLEACTFR	R
3	gi|343197606	Chain C, Complex Between Transferrin Receptor 1 And Transferrin With Iron In The N-Lobe, Cryocooled 2	2488	76819	153	101	77	60	74.2	990	1	0	0	851.899	1701.78	2	1701.78	0.003	1	29.95	0.0016	R	KCSTSSLLEACTFR	R
3	gi|343197606	Chain C, Complex Between Transferrin Receptor 1 And Transferrin With Iron In The N-Lobe, Cryocooled 2	2488	76819	153	101	77	60	74.2	998	1	0	1	853.888	1705.76	2	1705.76	0.0027	0	74.01	1.4e-06	K	LCMGSGLNLCEPNNK	E
3	gi|343197606	Chain C, Complex Between Transferrin Receptor 1 And Transferrin With Iron In The N-Lobe, Cryocooled 2	2488	76819	153	101	77	60	74.2	1027	1	0	0	863.389	1724.76	2	1724.76	0.003	0	70.91	5.3e-06	K	IECVSAETTEDCIAK	I
3	gi|343197606	Chain C, Complex Between Transferrin Receptor 1 And Transferrin With Iron In The N-Lobe, Cryocooled 2	2488	76819	153	101	77	60	74.2	1052	1	0	0	874.885	1747.75	2	1747.75	0.0033	1	33.97	0.0031	R	FDEFFSEGCAPGSKK	D
3	gi|343197606	Chain C, Complex Between Transferrin Receptor 1 And Transferrin With Iron In The N-Lobe, Cryocooled 2	2488	76819	153	101	77	60	74.2	1053	1	0	1	875.389	1748.76	2	1748.76	0.0001	0	27.9	0.0024	K	LCMGSGLNLCEPNNK	E
3	gi|343197606	Chain C, Complex Between Transferrin Receptor 1 And Transferrin With Iron In The N-Lobe, Cryocooled 2	2488	76819	153	101	77	60	74.2	1075	1	0	0	884.892	1767.77	2	1767.77	0.0039	0	26.38	0.0034	K	IECVSAETTEDCIAK	I
3	gi|343197606	Chain C, Complex Between Transferrin Receptor 1 And Transferrin With Iron In The N-Lobe, Cryocooled 2	2488	76819	153	101	77	60	74.2	1119	1	0	0	900.961	1799.91	2	1799.91	-0.0023	1	9.37	0.61	K	EDPQTFYYAVAVVKK	D
3	gi|343197606	Chain C, Complex Between Transferrin Receptor 1 And Transferrin With Iron In The N-Lobe, Cryocooled 2	2488	76819	153	101	77	60	74.2	1208	1	0	0	930.91	1859.8	2	1859.8	0.0017	0	40.62	0.0003	R	EGTCPEAPTDECKPVK	W
3	gi|343197606	Chain C, Complex Between Transferrin Receptor 1 And Transferrin With Iron In The N-Lobe, Cryocooled 2	2488	76819	153	101	77	60	74.2	1212	1	0	0	932.453	1862.89	2	1862.89	0.0005	2	41.77	0.00012	K	DKSKEFQLFSSPHGK	D
3	gi|343197606	Chain C, Complex Between Transferrin Receptor 1 And Transferrin With Iron In The N-Lobe, Cryocooled 2	2488	76819	153	101	77	60	74.2	1244	1	0	0	941.441	1880.87	2	1880.87	-0.001	1	64.6	5.8e-06	K	ADRDQYELLCLDNTR	K
3	gi|343197606	Chain C, Complex Between Transferrin Receptor 1 And Transferrin With Iron In The N-Lobe, Cryocooled 2	2488	76819	153	101	77	60	74.2	1301	1	0	0	642.302	1923.88	3	1923.87	0.01	1	18.84	0.085	K	ADRDQYELLCLDNTR	K
3	gi|343197606	Chain C, Complex Between Transferrin Receptor 1 And Transferrin With Iron In The N-Lobe, Cryocooled 2	2488	76819	153	101	77	60	74.2	1302	1	0	0	962.952	1923.89	2	1923.87	0.015	1	27.09	0.011	K	ADRDQYELLCLDNTR	K
3	gi|343197606	Chain C, Complex Between Transferrin Receptor 1 And Transferrin With Iron In The N-Lobe, Cryocooled 2	2488	76819	153	101	77	60	74.2	1312	1	0	0	646.004	1934.99	3	1934.99	0.0017	1	16.29	0.18	K	EFQLFSSPHGKDLLFK	D
3	gi|343197606	Chain C, Complex Between Transferrin Receptor 1 And Transferrin With Iron In The N-Lobe, Cryocooled 2	2488	76819	153	101	77	60	74.2	1313	1	0	0	968.503	1934.99	2	1934.99	0.0028	1	21.99	0.01	K	EFQLFSSPHGKDLLFK	D
3	gi|343197606	Chain C, Complex Between Transferrin Receptor 1 And Transferrin With Iron In The N-Lobe, Cryocooled 2	2488	76819	153	101	77	60	74.2	1339	1	0	0	976.974	1951.93	2	1951.93	0.0017	1	79.09	3e-05	K	NLNEKDYELLCLDGTR	K
3	gi|343197606	Chain C, Complex Between Transferrin Receptor 1 And Transferrin With Iron In The N-Lobe, Cryocooled 2	2488	76819	153	101	77	60	74.2	1340	1	0	0	651.652	1951.93	3	1951.93	0.0039	1	37.06	0.018	K	NLNEKDYELLCLDGTR	K
3	gi|343197606	Chain C, Complex Between Transferrin Receptor 1 And Transferrin With Iron In The N-Lobe, Cryocooled 2	2488	76819	153	101	77	60	74.2	1354	1	0	0	985.001	1967.99	2	1967.98	0.0059	1	44.68	0.00015	K	GDVAFVKHQTVPQNTGGK	N
3	gi|343197606	Chain C, Complex Between Transferrin Receptor 1 And Transferrin With Iron In The N-Lobe, Cryocooled 2	2488	76819	153	101	77	60	74.2	1361	1	0	0	990.007	1978	2	1977.99	0.0044	1	14.54	0.058	K	EFQLFSSPHGKDLLFK	D
3	gi|343197606	Chain C, Complex Between Transferrin Receptor 1 And Transferrin With Iron In The N-Lobe, Cryocooled 2	2488	76819	153	101	77	60	74.2	1378	1	0	0	998.479	1994.94	2	1994.94	0.0069	1	66.07	0.00069	K	NLNEKDYELLCLDGTR	K
3	gi|343197606	Chain C, Complex Between Transferrin Receptor 1 And Transferrin With Iron In The N-Lobe, Cryocooled 2	2488	76819	153	101	77	60	74.2	1386	1	0	1	1006.98	2011.94	2	2011.95	-0.0005	1	52.34	1.3e-05	R	DHMKSVIPSDGPSVACVK	K
3	gi|343197606	Chain C, Complex Between Transferrin Receptor 1 And Transferrin With Iron In The N-Lobe, Cryocooled 2	2488	76819	153	101	77	60	74.2	1401	1	0	0	680.302	2037.88	3	2037.88	0.0059	1	77.23	1.4e-07	R	WCAVSEHEATKCQSFR	D
3	gi|343197606	Chain C, Complex Between Transferrin Receptor 1 And Transferrin With Iron In The N-Lobe, Cryocooled 2	2488	76819	153	101	77	60	74.2	1432	1	0	0	690.683	2069.03	3	2069.02	0.0045	0	29.92	0.0016	K	EDLIWELLNQAQEHFGK	D
3	gi|343197606	Chain C, Complex Between Transferrin Receptor 1 And Transferrin With Iron In The N-Lobe, Cryocooled 2	2488	76819	153	101	77	60	74.2	1433	1	0	0	1035.52	2069.03	2	2069.02	0.0047	0	46.26	0.00075	K	EDLIWELLNQAQEHFGK	D
3	gi|343197606	Chain C, Complex Between Transferrin Receptor 1 And Transferrin With Iron In The N-Lobe, Cryocooled 2	2488	76819	153	101	77	60	74.2	1450	1	0	0	1041.45	2080.88	2	2080.88	-0.0025	1	8.68	0.25	R	WCAVSEHEATKCQSFR	D
3	gi|343197606	Chain C, Complex Between Transferrin Receptor 1 And Transferrin With Iron In The N-Lobe, Cryocooled 2	2488	76819	153	101	77	60	74.2	1475	1	0	0	1049.02	2096.02	2	2096.02	0.001	2	7.9	0.37	R	SETKDLLFRDDTVCLAK	L
3	gi|343197606	Chain C, Complex Between Transferrin Receptor 1 And Transferrin With Iron In The N-Lobe, Cryocooled 2	2488	76819	153	101	77	60	74.2	1537	1	0	1	1080.02	2158.02	2	2158.01	0.0112	0	29.56	0.0021	K	IMNGEADAMSLDGGFVYIAGK	C
3	gi|343197606	Chain C, Complex Between Transferrin Receptor 1 And Transferrin With Iron In The N-Lobe, Cryocooled 2	2488	76819	153	101	77	60	74.2	1549	1	0	0	724.372	2170.09	3	2170.09	0.0064	0	71.3	4.4e-06	R	SAGWNIPIGLLYCDLPEPR	K
3	gi|343197606	Chain C, Complex Between Transferrin Receptor 1 And Transferrin With Iron In The N-Lobe, Cryocooled 2	2488	76819	153	101	77	60	74.2	1550	1	0	0	1086.06	2170.1	2	2170.09	0.009	0	60.29	1.8e-05	R	SAGWNIPIGLLYCDLPEPR	K
3	gi|343197606	Chain C, Complex Between Transferrin Receptor 1 And Transferrin With Iron In The N-Lobe, Cryocooled 2	2488	76819	153	101	77	60	74.2	1556	1	0	0	725.032	2172.08	3	2172.07	0.0005	2	44.23	0.00032	K	DLLFRDDTVCLAKLHDR	N
3	gi|343197606	Chain C, Complex Between Transferrin Receptor 1 And Transferrin With Iron In The N-Lobe, Cryocooled 2	2488	76819	153	101	77	60	74.2	1567	1	0	0	732.049	2193.13	3	2193.12	0.0039	2	4.39	0.55	K	SKEFQLFSSPHGKDLLFK	D
3	gi|343197606	Chain C, Complex Between Transferrin Receptor 1 And Transferrin With Iron In The N-Lobe, Cryocooled 2	2488	76819	153	101	77	60	74.2	1571	1	0	1	1101.52	2201.02	2	2201.01	0.0042	0	13.49	0.066	K	IMNGEADAMSLDGGFVYIAGK	C
3	gi|343197606	Chain C, Complex Between Transferrin Receptor 1 And Transferrin With Iron In The N-Lobe, Cryocooled 2	2488	76819	153	101	77	60	74.2	1586	1	0	0	1107.56	2213.1	2	2213.09	0.0033	0	45.38	0.00015	R	SAGWNIPIGLLYCDLPEPR	K
3	gi|343197606	Chain C, Complex Between Transferrin Receptor 1 And Transferrin With Iron In The N-Lobe, Cryocooled 2	2488	76819	153	101	77	60	74.2	1643	1	0	0	759.382	2275.12	3	2275.12	0	1	42.59	0.13	K	DGAGDVAFVKHSTIFENLANK	A
3	gi|343197606	Chain C, Complex Between Transferrin Receptor 1 And Transferrin With Iron In The N-Lobe, Cryocooled 2	2488	76819	153	101	77	60	74.2	1644	1	0	0	1138.57	2275.13	2	2275.12	0.0041	1	45.29	0.0072	K	DGAGDVAFVKHSTIFENLANK	A
3	gi|343197606	Chain C, Complex Between Transferrin Receptor 1 And Transferrin With Iron In The N-Lobe, Cryocooled 2	2488	76819	153	101	77	60	74.2	1662	1	0	1	767.719	2300.13	3	2300.13	0.0039	1	44.05	0.00035	R	TAGWNIPMGLLYNKINHCR	F
3	gi|343197606	Chain C, Complex Between Transferrin Receptor 1 And Transferrin With Iron In The N-Lobe, Cryocooled 2	2488	76819	153	101	77	60	74.2	1663	1	0	1	1151.07	2300.13	2	2300.13	0.004	1	44.79	0.00056	R	TAGWNIPMGLLYNKINHCR	F
3	gi|343197606	Chain C, Complex Between Transferrin Receptor 1 And Transferrin With Iron In The N-Lobe, Cryocooled 2	2488	76819	153	101	77	60	74.2	1686	1	0	0	773.718	2318.13	3	2318.13	0.0043	1	24.86	0.028	K	DGAGDVAFVKHSTIFENLANK	A
3	gi|343197606	Chain C, Complex Between Transferrin Receptor 1 And Transferrin With Iron In The N-Lobe, Cryocooled 2	2488	76819	153	101	77	60	74.2	1687	1	0	0	1160.07	2318.13	2	2318.13	0.0053	1	34.57	0.00089	K	DGAGDVAFVKHSTIFENLANK	A
3	gi|343197606	Chain C, Complex Between Transferrin Receptor 1 And Transferrin With Iron In The N-Lobe, Cryocooled 2	2488	76819	153	101	77	60	74.2	1693	1	0	0	778.056	2331.15	3	2331.15	-0.0042	2	16	0.27	R	NTYEKYLGEEYVKAVGNLR	K
3	gi|343197606	Chain C, Complex Between Transferrin Receptor 1 And Transferrin With Iron In The N-Lobe, Cryocooled 2	2488	76819	153	101	77	60	74.2	1694	1	0	0	1166.58	2331.15	2	2331.15	-0.0006	2	56.18	0.00025	R	NTYEKYLGEEYVKAVGNLR	K
3	gi|343197606	Chain C, Complex Between Transferrin Receptor 1 And Transferrin With Iron In The N-Lobe, Cryocooled 2	2488	76819	153	101	77	60	74.2	1701	1	0	1	782.054	2343.14	3	2343.14	0.0037	1	14.7	0.057	R	TAGWNIPMGLLYNKINHCR	F
3	gi|343197606	Chain C, Complex Between Transferrin Receptor 1 And Transferrin With Iron In The N-Lobe, Cryocooled 2	2488	76819	153	101	77	60	74.2	1702	1	0	1	1172.58	2343.14	2	2343.14	0.005	1	7.96	0.18	R	TAGWNIPMGLLYNKINHCR	F
3	gi|343197606	Chain C, Complex Between Transferrin Receptor 1 And Transferrin With Iron In The N-Lobe, Cryocooled 2	2488	76819	153	101	77	60	74.2	1710	1	0	0	786.055	2355.14	3	2355.15	-0.0066	1	9.07	0.18	K	EDLIWELLNQAQEHFGKDK	S
3	gi|343197606	Chain C, Complex Between Transferrin Receptor 1 And Transferrin With Iron In The N-Lobe, Cryocooled 2	2488	76819	153	101	77	60	74.2	1711	1	0	0	1178.58	2355.15	2	2355.15	0.0022	1	23.19	0.0088	K	EDLIWELLNQAQEHFGKDK	S
3	gi|343197606	Chain C, Complex Between Transferrin Receptor 1 And Transferrin With Iron In The N-Lobe, Cryocooled 2	2488	76819	153	101	77	60	74.2	1739	1	0	0	800.393	2398.16	3	2398.16	0.0016	1	2.23	0.9	K	EDLIWELLNQAQEHFGKDK	S
3	gi|343197606	Chain C, Complex Between Transferrin Receptor 1 And Transferrin With Iron In The N-Lobe, Cryocooled 2	2488	76819	153	101	77	60	74.2	1740	1	0	0	1200.09	2398.16	2	2398.16	0.0019	1	4.19	0.57	K	EDLIWELLNQAQEHFGKDK	S
3	gi|343197606	Chain C, Complex Between Transferrin Receptor 1 And Transferrin With Iron In The N-Lobe, Cryocooled 2	2488	76819	153	101	77	60	74.2	1825	1	0	1	844.085	2529.23	3	2529.23	0.0013	1	42.4	0.00073	R	SMGGKEDLIWELLNQAQEHFGK	D
3	gi|343197606	Chain C, Complex Between Transferrin Receptor 1 And Transferrin With Iron In The N-Lobe, Cryocooled 2	2488	76819	153	101	77	60	74.2	1847	1	0	1	637.315	2545.23	4	2545.23	0.0034	1	1.27	0.76	R	SMGGKEDLIWELLNQAQEHFGK	D
3	gi|343197606	Chain C, Complex Between Transferrin Receptor 1 And Transferrin With Iron In The N-Lobe, Cryocooled 2	2488	76819	153	101	77	60	74.2	1852	1	0	0	638.08	2548.29	4	2548.29	0.0033	1	60.71	2.5e-06	R	KPVDEYKDCHLAQVPSHTVVAR	S
3	gi|343197606	Chain C, Complex Between Transferrin Receptor 1 And Transferrin With Iron In The N-Lobe, Cryocooled 2	2488	76819	153	101	77	60	74.2	1869	1	0	1	858.419	2572.23	3	2572.24	-0.0037	1	5.46	0.49	R	SMGGKEDLIWELLNQAQEHFGK	D
3	gi|343197606	Chain C, Complex Between Transferrin Receptor 1 And Transferrin With Iron In The N-Lobe, Cryocooled 2	2488	76819	153	101	77	60	74.2	1870	1	0	1	1287.13	2572.24	2	2572.24	-0.0003	1	25.58	0.004	R	SMGGKEDLIWELLNQAQEHFGK	D
3	gi|343197606	Chain C, Complex Between Transferrin Receptor 1 And Transferrin With Iron In The N-Lobe, Cryocooled 2	2488	76819	153	101	77	60	74.2	1871	1	0	1	858.421	2572.24	3	2572.24	0.0029	1	41.22	0.00027	R	SMGGKEDLIWELLNQAQEHFGK	D
3	gi|343197606	Chain C, Complex Between Transferrin Receptor 1 And Transferrin With Iron In The N-Lobe, Cryocooled 2	2488	76819	153	101	77	60	74.2	1872	1	0	1	1287.13	2572.24	2	2572.24	0.0053	1	33.27	0.0019	R	SMGGKEDLIWELLNQAQEHFGK	D
3	gi|343197606	Chain C, Complex Between Transferrin Receptor 1 And Transferrin With Iron In The N-Lobe, Cryocooled 2	2488	76819	153	101	77	60	74.2	1873	3	0	1	858.422	2572.24	3	2572.24	0.0062	1	1.62	1	R	SMGGKEDLIWELLNQAQEHFGK	D
3	gi|343197606	Chain C, Complex Between Transferrin Receptor 1 And Transferrin With Iron In The N-Lobe, Cryocooled 2	2488	76819	153	101	77	60	74.2	1893	1	0	1	863.752	2588.23	3	2588.23	0.0016	1	19.08	0.016	R	SMGGKEDLIWELLNQAQEHFGK	D
3	gi|343197606	Chain C, Complex Between Transferrin Receptor 1 And Transferrin With Iron In The N-Lobe, Cryocooled 2	2488	76819	153	101	77	60	74.2	1897	1	0	0	648.832	2591.3	4	2591.29	0.007	1	48.51	3.2e-05	R	KPVDEYKDCHLAQVPSHTVVAR	S
3	gi|343197606	Chain C, Complex Between Transferrin Receptor 1 And Transferrin With Iron In The N-Lobe, Cryocooled 2	2488	76819	153	101	77	60	74.2	1901	1	0	0	866.775	2597.3	3	2597.3	0.0026	2	22.78	0.36	R	CLVEKGDVAFVKHQTVPQNTGGK	N
3	gi|343197606	Chain C, Complex Between Transferrin Receptor 1 And Transferrin With Iron In The N-Lobe, Cryocooled 2	2488	76819	153	101	77	60	74.2	1912	1	0	0	1304.65	2607.28	2	2607.28	-0.0009	2	40.71	0.06	K	SVIPSDGPSVACVKKASYLDCIR	A
3	gi|343197606	Chain C, Complex Between Transferrin Receptor 1 And Transferrin With Iron In The N-Lobe, Cryocooled 2	2488	76819	153	101	77	60	74.2	1913	1	0	0	870.101	2607.28	3	2607.28	0.0033	2	27.23	0.26	K	SVIPSDGPSVACVKKASYLDCIR	A
3	gi|343197606	Chain C, Complex Between Transferrin Receptor 1 And Transferrin With Iron In The N-Lobe, Cryocooled 2	2488	76819	153	101	77	60	74.2	1917	1	0	1	872.753	2615.24	3	2615.24	-0.0054	1	1.61	0.74	R	SMGGKEDLIWELLNQAQEHFGK	D
3	gi|343197606	Chain C, Complex Between Transferrin Receptor 1 And Transferrin With Iron In The N-Lobe, Cryocooled 2	2488	76819	153	101	77	60	74.2	1934	1	0	0	879.107	2634.3	3	2634.3	0.0019	1	50.4	0.021	R	KPVDEYKDCHLAQVPSHTVVAR	S
3	gi|343197606	Chain C, Complex Between Transferrin Receptor 1 And Transferrin With Iron In The N-Lobe, Cryocooled 2	2488	76819	153	101	77	60	74.2	1935	1	0	0	659.582	2634.3	4	2634.3	0.0032	1	20.34	0.76	R	KPVDEYKDCHLAQVPSHTVVAR	S
3	gi|343197606	Chain C, Complex Between Transferrin Receptor 1 And Transferrin With Iron In The N-Lobe, Cryocooled 2	2488	76819	153	101	77	60	74.2	1949	1	0	0	886.436	2656.29	3	2656.29	-0.0013	2	4.69	0.52	K	EDLIWELLNQAQEHFGKDKSK	E
3	gi|343197606	Chain C, Complex Between Transferrin Receptor 1 And Transferrin With Iron In The N-Lobe, Cryocooled 2	2488	76819	153	101	77	60	74.2	1964	1	0	0	893.443	2677.31	3	2677.3	0.0056	1	59.46	2.7e-06	R	KPVDEYKDCHLAQVPSHTVVAR	S
3	gi|343197606	Chain C, Complex Between Transferrin Receptor 1 And Transferrin With Iron In The N-Lobe, Cryocooled 2	2488	76819	153	101	77	60	74.2	1994	1	0	0	907.453	2719.34	3	2719.34	-0.0016	2	30.28	0.51	K	CLKDGAGDVAFVKHSTIFENLANK	A
3	gi|343197606	Chain C, Complex Between Transferrin Receptor 1 And Transferrin With Iron In The N-Lobe, Cryocooled 2	2488	76819	153	101	77	60	74.2	2034	1	0	0	935.448	2803.32	3	2803.32	-0.0004	2	88.49	9e-09	K	NPDPWAKNLNEKDYELLCLDGTR	K
3	gi|343197606	Chain C, Complex Between Transferrin Receptor 1 And Transferrin With Iron In The N-Lobe, Cryocooled 2	2488	76819	153	101	77	60	74.2	2037	1	0	1	939.454	2815.34	3	2815.36	-0.0209	2	12.81	0.063	R	SMGGKEDLIWELLNQAQEHFGKDK	S
3	gi|343197606	Chain C, Complex Between Transferrin Receptor 1 And Transferrin With Iron In The N-Lobe, Cryocooled 2	2488	76819	153	101	77	60	74.2	2038	1	0	1	939.461	2815.36	3	2815.36	0.0019	2	20.71	0.011	R	SMGGKEDLIWELLNQAQEHFGKDK	S
3	gi|343197606	Chain C, Complex Between Transferrin Receptor 1 And Transferrin With Iron In The N-Lobe, Cryocooled 2	2488	76819	153	101	77	60	74.2	2039	1	0	1	704.848	2815.36	4	2815.36	0.0042	2	6.84	0.85	R	SMGGKEDLIWELLNQAQEHFGKDK	S
3	gi|343197606	Chain C, Complex Between Transferrin Receptor 1 And Transferrin With Iron In The N-Lobe, Cryocooled 2	2488	76819	153	101	77	60	74.2	2041	1	0	1	704.85	2815.37	4	2815.36	0.011	2	10.84	0.096	R	SMGGKEDLIWELLNQAQEHFGKDK	S
3	gi|343197606	Chain C, Complex Between Transferrin Receptor 1 And Transferrin With Iron In The N-Lobe, Cryocooled 2	2488	76819	153	101	77	60	74.2	2051	1	0	0	709.363	2833.42	4	2833.42	0.0025	2	21.77	0.12	K	EFQLFSSPHGKDLLFKDSAHGFLK	V
3	gi|343197606	Chain C, Complex Between Transferrin Receptor 1 And Transferrin With Iron In The N-Lobe, Cryocooled 2	2488	76819	153	101	77	60	74.2	2052	1	0	0	945.481	2833.42	3	2833.42	0.0036	2	25.81	0.018	K	EFQLFSSPHGKDLLFKDSAHGFLK	V
3	gi|343197606	Chain C, Complex Between Transferrin Receptor 1 And Transferrin With Iron In The N-Lobe, Cryocooled 2	2488	76819	153	101	77	60	74.2	2072	1	0	1	953.797	2858.37	3	2858.37	0.0032	2	33.11	0.00079	R	SMGGKEDLIWELLNQAQEHFGKDK	S
3	gi|343197606	Chain C, Complex Between Transferrin Receptor 1 And Transferrin With Iron In The N-Lobe, Cryocooled 2	2488	76819	153	101	77	60	74.2	2073	1	0	1	953.797	2858.37	3	2858.37	0.0041	2	26.38	0.017	R	SMGGKEDLIWELLNQAQEHFGKDK	S
3	gi|343197606	Chain C, Complex Between Transferrin Receptor 1 And Transferrin With Iron In The N-Lobe, Cryocooled 2	2488	76819	153	101	77	60	74.2	2083	1	0	0	959.816	2876.43	3	2876.42	0.0028	2	12.23	0.081	K	EFQLFSSPHGKDLLFKDSAHGFLK	V
3	gi|343197606	Chain C, Complex Between Transferrin Receptor 1 And Transferrin With Iron In The N-Lobe, Cryocooled 2	2488	76819	153	101	77	60	74.2	2143	1	0	0	760.09	3036.33	4	3036.33	0.002	1	31.9	0.62	R	EGTCPEAPTDECKPVKWCALSHHER	L
3	gi|343197606	Chain C, Complex Between Transferrin Receptor 1 And Transferrin With Iron In The N-Lobe, Cryocooled 2	2488	76819	153	101	77	60	74.2	2161	1	0	0	770.842	3079.34	4	3079.33	0.0046	1	27.74	0.38	R	EGTCPEAPTDECKPVKWCALSHHER	L
3	gi|343197606	Chain C, Complex Between Transferrin Receptor 1 And Transferrin With Iron In The N-Lobe, Cryocooled 2	2488	76819	153	101	77	60	74.2	2187	1	0	0	795.636	3178.51	4	3178.51	0.0032	2	30.69	0.0016	K	HSTIFENLANKADRDQYELLCLDNTR	K
3	gi|343197606	Chain C, Complex Between Transferrin Receptor 1 And Transferrin With Iron In The N-Lobe, Cryocooled 2	2488	76819	153	101	77	60	74.2	2188	1	0	0	1060.51	3178.52	3	3178.51	0.007	2	32.48	0.18	K	HSTIFENLANKADRDQYELLCLDNTR	K
3	gi|343197606	Chain C, Complex Between Transferrin Receptor 1 And Transferrin With Iron In The N-Lobe, Cryocooled 2	2488	76819	153	101	77	60	74.2	2205	1	0	0	806.387	3221.52	4	3221.52	0.0034	2	43.92	0.00022	K	HSTIFENLANKADRDQYELLCLDNTR	K
3	gi|343197606	Chain C, Complex Between Transferrin Receptor 1 And Transferrin With Iron In The N-Lobe, Cryocooled 2	2488	76819	153	101	77	60	74.2	2206	1	0	0	1074.85	3221.52	3	3221.52	0.0077	2	9.01	0.14	K	HSTIFENLANKADRDQYELLCLDNTR	K
3	gi|343197606	Chain C, Complex Between Transferrin Receptor 1 And Transferrin With Iron In The N-Lobe, Cryocooled 2	2488	76819	153	101	77	60	74.2	2315	1	0	0	989.26	3953.01	4	3953.01	0.0027	0	61.54	1.7e-06	R	AIAANEADAVTLDAGLVYDAYLAPNNLKPVVAEFYGSK	E
3	gi|343197606	Chain C, Complex Between Transferrin Receptor 1 And Transferrin With Iron In The N-Lobe, Cryocooled 2	2488	76819	153	101	77	60	74.2	2316	1	0	0	1318.68	3953.02	3	3953.01	0.006	0	45.29	5.7e-05	R	AIAANEADAVTLDAGLVYDAYLAPNNLKPVVAEFYGSK	E
3	gi|343197606	Chain C, Complex Between Transferrin Receptor 1 And Transferrin With Iron In The N-Lobe, Cryocooled 2	2488	76819	153	101	77	60	74.2	2317	1	0	0	1333.01	3996.02	3	3996.02	0.0001	0	47.34	3.6e-05	R	AIAANEADAVTLDAGLVYDAYLAPNNLKPVVAEFYGSK	E
3	gi|343197606	Chain C, Complex Between Transferrin Receptor 1 And Transferrin With Iron In The N-Lobe, Cryocooled 2	2488	76819	153	101	77	60	74.2	2318	1	0	0	1000.01	3996.02	4	3996.02	0.0033	0	44.58	0.0003	R	AIAANEADAVTLDAGLVYDAYLAPNNLKPVVAEFYGSK	E
4	gi|37747855	Transferrin [Homo sapiens]	2445	77030	144	97	72	58	72.2	10	3	0	0	706.39	705.383	1	705.381	0.0022	0	19.57	1.2	K	DLLFR	D
4	gi|37747855	Transferrin [Homo sapiens]	2445	77030	144	97	72	58	72.2	72	1	0	0	459.228	916.441	2	916.44	0.0008	0	10.26	0.43	K	DSAHGFLK	V
4	gi|37747855	Transferrin [Homo sapiens]	2445	77030	144	97	72	58	72.2	123	1	0	0	499.243	996.47	2	996.47	0.0006	0	23.33	0.051	K	ASYLDCIR	A
4	gi|37747855	Transferrin [Homo sapiens]	2445	77030	144	97	72	58	72.2	126	5	0	0	500.753	999.492	2	999.491	0.0008	0	3.53	1.1	K	YLGEEYVK	A
4	gi|37747855	Transferrin [Homo sapiens]	2445	77030	144	97	72	58	72.2	223	1	0	0	563.291	1124.57	2	1124.56	0.002	1	31.63	0.062	K	KASYLDCIR	A
4	gi|37747855	Transferrin [Homo sapiens]	2445	77030	144	97	72	58	72.2	256	1	0	0	576.308	1150.6	2	1150.6	0.0036	1	38.44	0.048	R	SETKDLLFR	D
4	gi|37747855	Transferrin [Homo sapiens]	2445	77030	144	97	72	58	72.2	276	1	0	0	584.793	1167.57	2	1167.57	0.0014	1	46.3	0.0013	K	KASYLDCIR	A
4	gi|37747855	Transferrin [Homo sapiens]	2445	77030	144	97	72	58	72.2	299	1	0	1	598.281	1194.55	2	1194.55	0.0021	0	53.06	0.00021	K	DSGFQMNQLR	G
4	gi|37747855	Transferrin [Homo sapiens]	2445	77030	144	97	72	58	72.2	321	1	0	0	606.319	1210.62	2	1210.62	-0.0008	1	25.67	0.17	K	EACVHKILR	Q
4	gi|37747855	Transferrin [Homo sapiens]	2445	77030	144	97	72	58	72.2	364	1	0	0	413.52	1237.54	3	1237.54	-0.0026	0	24.82	0.021	K	WCALSHHER	L
4	gi|37747855	Transferrin [Homo sapiens]	2445	77030	144	97	72	58	72.2	380	1	0	0	625.308	1248.6	2	1248.6	0.0032	0	49.02	0.0026	K	SASDLTWDNLK	G
4	gi|37747855	Transferrin [Homo sapiens]	2445	77030	144	97	72	58	72.2	407	1	0	0	637.333	1272.65	2	1272.65	0.0058	0	66.22	2.2e-06	K	HSTIFENLANK	A
4	gi|37747855	Transferrin [Homo sapiens]	2445	77030	144	97	72	58	72.2	418	1	0	0	638.821	1275.63	2	1275.62	0.0035	0	42.75	0.0011	K	EFQLFSSPHGK	D
4	gi|37747855	Transferrin [Homo sapiens]	2445	77030	144	97	72	58	72.2	426	1	0	0	640.783	1279.55	2	1279.55	0.0013	0	29.83	0.013	K	CDEWSVNSVGK	I
4	gi|37747855	Transferrin [Homo sapiens]	2445	77030	144	97	72	58	72.2	469	1	0	0	658.835	1315.65	2	1315.65	0.0024	0	50.87	5e-05	K	HSTIFENLANK	A
4	gi|37747855	Transferrin [Homo sapiens]	2445	77030	144	97	72	58	72.2	472	1	0	0	660.324	1318.63	2	1318.63	0.0034	0	48.26	0.00068	K	EFQLFSSPHGK	D
4	gi|37747855	Transferrin [Homo sapiens]	2445	77030	144	97	72	58	72.2	520	1	0	0	677.845	1353.67	2	1353.62	0.0512	0	32.53	0.0083	K	DYELLCLDGTR	K
4	gi|37747855	Transferrin [Homo sapiens]	2445	77030	144	97	72	58	72.2	526	1	0	0	680.803	1359.59	2	1359.59	0.0033	0	38.11	0.0017	R	WCAVSEHEATK	C
4	gi|37747855	Transferrin [Homo sapiens]	2445	77030	144	97	72	58	72.2	533	1	0	1	683.835	1365.66	2	1365.65	0.0095	1	60.88	2.3e-05	K	KDSGFQMNQLR	G
4	gi|37747855	Transferrin [Homo sapiens]	2445	77030	144	97	72	58	72.2	570	1	0	0	704.37	1406.73	2	1406.72	0.0035	1	42.57	0.057	R	CLVEKGDVAFVK	H
4	gi|37747855	Transferrin [Homo sapiens]	2445	77030	144	97	72	58	72.2	571	1	0	0	704.371	1406.73	2	1406.72	0.0045	1	7.52	0.53	R	CLVEKGDVAFVK	H
4	gi|37747855	Transferrin [Homo sapiens]	2445	77030	144	97	72	58	72.2	575	1	0	0	705.371	1408.73	2	1408.72	0.0061	1	16.48	0.085	K	DSAHGFLKVPPR	M
4	gi|37747855	Transferrin [Homo sapiens]	2445	77030	144	97	72	58	72.2	583	1	0	0	471.253	1410.74	3	1410.74	-0.0018	2	18.54	0.057	K	DKEACVHKILR	Q
4	gi|37747855	Transferrin [Homo sapiens]	2445	77030	144	97	72	58	72.2	588	1	0	0	708.365	1414.71	2	1414.71	0.002	0	76.46	6.1e-05	K	SVIPSDGPSVACVK	K
4	gi|37747855	Transferrin [Homo sapiens]	2445	77030	144	97	72	58	72.2	596	1	0	0	710.853	1419.69	2	1419.7	-0.0073	1	33.95	0.0053	K	KSASDLTWDNLK	G
4	gi|37747855	Transferrin [Homo sapiens]	2445	77030	144	97	72	58	72.2	628	1	0	0	725.869	1449.72	2	1449.73	-0.0058	1	29.48	0.0072	R	CLVEKGDVAFVK	H
4	gi|37747855	Transferrin [Homo sapiens]	2445	77030	144	97	72	58	72.2	632	1	0	0	727.881	1453.75	2	1453.75	0.0015	2	37.55	0.43	K	DKEACVHKILR	Q
4	gi|37747855	Transferrin [Homo sapiens]	2445	77030	144	97	72	58	72.2	662	1	0	0	739.368	1476.72	2	1476.72	0.001	1	41.53	0.2	K	SASDLTWDNLKGK	K
4	gi|37747855	Transferrin [Homo sapiens]	2445	77030	144	97	72	58	72.2	665	1	0	1	739.872	1477.73	2	1477.73	0.0011	0	76.93	9.6e-08	K	MYLGYEYVTAIR	N
4	gi|37747855	Transferrin [Homo sapiens]	2445	77030	144	97	72	58	72.2	666	1	0	1	739.872	1477.73	2	1477.73	0.0015	0	68.41	1e-06	K	MYLGYEYVTAIR	N
4	gi|37747855	Transferrin [Homo sapiens]	2445	77030	144	97	72	58	72.2	672	1	0	0	743.361	1484.71	2	1484.7	0.0039	1	51.57	0.018	R	DDTVCLAKLHDR	N
4	gi|37747855	Transferrin [Homo sapiens]	2445	77030	144	97	72	58	72.2	680	1	0	0	497.925	1490.75	3	1490.75	-0.0001	1	2.08	0.64	K	SKEFQLFSSPHGK	D
4	gi|37747855	Transferrin [Homo sapiens]	2445	77030	144	97	72	58	72.2	685	1	0	1	747.867	1493.72	2	1493.72	-0.0024	0	46.76	5.5e-05	K	MYLGYEYVTAIR	N
4	gi|37747855	Transferrin [Homo sapiens]	2445	77030	144	97	72	58	72.2	691	1	0	0	749.384	1496.75	2	1496.75	0.0011	2	36.35	0.0025	K	DKEACVHKILR	Q
4	gi|37747855	Transferrin [Homo sapiens]	2445	77030	144	97	72	58	72.2	726	1	0	0	761.372	1520.73	2	1520.73	0.0009	1	78.26	7.2e-07	R	LKCDEWSVNSVGK	I
4	gi|37747855	Transferrin [Homo sapiens]	2445	77030	144	97	72	58	72.2	727	1	0	1	761.373	1520.73	2	1520.73	-0.0011	0	37.75	0.002	K	MYLGYEYVTAIR	N
4	gi|37747855	Transferrin [Homo sapiens]	2445	77030	144	97	72	58	72.2	733	1	0	0	764.863	1527.71	2	1527.71	0.0021	1	38.93	0.0012	R	DDTVCLAKLHDR	N
4	gi|37747855	Transferrin [Homo sapiens]	2445	77030	144	97	72	58	72.2	737	1	0	0	766.35	1530.69	2	1530.68	0.0048	0	79.28	1.4e-07	K	CSTSSLLEACTFR	R
4	gi|37747855	Transferrin [Homo sapiens]	2445	77030	144	97	72	58	72.2	739	1	0	0	767.407	1532.8	2	1532.8	-0.0003	1	38.34	0.095	K	DLLFKDSAHGFLK	V
4	gi|37747855	Transferrin [Homo sapiens]	2445	77030	144	97	72	58	72.2	742	1	0	0	767.887	1533.76	2	1533.76	0.0019	1	53.54	0.00072	K	SKEFQLFSSPHGK	D
4	gi|37747855	Transferrin [Homo sapiens]	2445	77030	144	97	72	58	72.2	749	1	0	0	770.358	1538.7	2	1538.7	-0.0016	0	64.17	1.9e-05	R	DQYELLCLDNTR	K
4	gi|37747855	Transferrin [Homo sapiens]	2445	77030	144	97	72	58	72.2	786	1	0	0	782.875	1563.74	2	1563.74	0.0005	1	78.15	4e-07	R	LKCDEWSVNSVGK	I
4	gi|37747855	Transferrin [Homo sapiens]	2445	77030	144	97	72	58	72.2	789	1	0	0	783.403	1564.79	2	1564.79	-0.0011	1	41.01	0.0041	K	DLLFRDDTVCLAK	L
4	gi|37747855	Transferrin [Homo sapiens]	2445	77030	144	97	72	58	72.2	802	1	0	0	787.851	1573.69	2	1573.69	0.0018	0	66.83	5e-06	K	CSTSSLLEACTFR	R
4	gi|37747855	Transferrin [Homo sapiens]	2445	77030	144	97	72	58	72.2	805	1	0	0	788.908	1575.8	2	1575.8	-0.0037	1	25.08	0.045	K	DLLFKDSAHGFLK	V
4	gi|37747855	Transferrin [Homo sapiens]	2445	77030	144	97	72	58	72.2	810	1	0	0	789.335	1576.65	2	1576.65	0.0044	0	102	1.2e-09	R	FDEFFSEGCAPGSK	K
4	gi|37747855	Transferrin [Homo sapiens]	2445	77030	144	97	72	58	72.2	811	1	0	0	789.391	1576.77	2	1576.76	0.0043	1	53.38	0.00011	K	SKEFQLFSSPHGK	D
4	gi|37747855	Transferrin [Homo sapiens]	2445	77030	144	97	72	58	72.2	813	1	0	1	789.411	1576.81	2	1576.81	0.0007	0	57.73	3.7e-05	R	TAGWNIPMGLLYNK	I
4	gi|37747855	Transferrin [Homo sapiens]	2445	77030	144	97	72	58	72.2	819	1	0	0	529.596	1585.77	3	1585.77	-0.0012	0	76.27	3.1e-07	R	KPVEEYANCHLAR	A
4	gi|37747855	Transferrin [Homo sapiens]	2445	77030	144	97	72	58	72.2	820	1	0	0	793.915	1585.82	2	1585.81	0.0026	1	35.81	0.7	K	SVIPSDGPSVACVKK	A
4	gi|37747855	Transferrin [Homo sapiens]	2445	77030	144	97	72	58	72.2	851	1	0	0	804.378	1606.74	2	1606.74	-0.0003	1	43.29	0.00029	R	LKCDEWSVNSVGK	I
4	gi|37747855	Transferrin [Homo sapiens]	2445	77030	144	97	72	58	72.2	874	1	0	0	810.835	1619.65	2	1619.66	-0.0016	0	39.42	0.00029	R	FDEFFSEGCAPGSK	K
4	gi|37747855	Transferrin [Homo sapiens]	2445	77030	144	97	72	58	72.2	889	1	0	0	815.393	1628.77	2	1628.77	-0.0022	0	72.88	7.8e-07	R	KPVEEYANCHLAR	A
4	gi|37747855	Transferrin [Homo sapiens]	2445	77030	144	97	72	58	72.2	890	1	0	0	543.931	1628.77	3	1628.77	-0.0005	0	50.69	5.5e-05	R	KPVEEYANCHLAR	A
4	gi|37747855	Transferrin [Homo sapiens]	2445	77030	144	97	72	58	72.2	891	1	0	0	543.932	1628.77	3	1628.77	-0.0002	0	58.59	1.9e-05	R	KPVEEYANCHLAR	A
4	gi|37747855	Transferrin [Homo sapiens]	2445	77030	144	97	72	58	72.2	892	1	0	0	815.411	1628.81	2	1628.81	-0.0004	0	53.5	5.5e-05	K	EDPQTFYYAVAVVK	K
4	gi|37747855	Transferrin [Homo sapiens]	2445	77030	144	97	72	58	72.2	918	1	0	0	824.919	1647.82	2	1647.82	0.002	2	10.62	0.54	K	SASDLTWDNLKGKK	S
4	gi|37747855	Transferrin [Homo sapiens]	2445	77030	144	97	72	58	72.2	921	1	0	0	827.433	1652.85	2	1652.85	0.0003	1	43.77	0.1	K	YLGEEYVKAVGNLR	K
4	gi|37747855	Transferrin [Homo sapiens]	2445	77030	144	97	72	58	72.2	928	1	0	0	829.915	1657.82	2	1657.82	-0.002	1	63.28	8.7e-05	K	HSTIFENLANKADR	D
4	gi|37747855	Transferrin [Homo sapiens]	2445	77030	144	97	72	58	72.2	948	1	0	0	836.898	1671.78	2	1671.78	0.0021	0	52.91	9.8e-05	R	KPVEEYANCHLAR	A
4	gi|37747855	Transferrin [Homo sapiens]	2445	77030	144	97	72	58	72.2	949	1	0	0	836.913	1671.81	2	1671.81	-0.004	0	30.47	0.0014	K	EDPQTFYYAVAVVK	K
4	gi|37747855	Transferrin [Homo sapiens]	2445	77030	144	97	72	58	72.2	963	1	0	0	839.904	1677.79	2	1677.79	0.0047	1	40.27	0.026	R	NTYEKYLGEEYVK	A
4	gi|37747855	Transferrin [Homo sapiens]	2445	77030	144	97	72	58	72.2	971	1	0	0	563.955	1688.84	3	1688.84	0	0	47.31	0.00016	K	DCHLAQVPSHTVVAR	S
4	gi|37747855	Transferrin [Homo sapiens]	2445	77030	144	97	72	58	72.2	983	1	0	0	848.935	1695.86	2	1695.86	-0.003	1	37.58	0.00069	K	YLGEEYVKAVGNLR	K
4	gi|37747855	Transferrin [Homo sapiens]	2445	77030	144	97	72	58	72.2	988	2	0	0	851.418	1700.82	2	1700.82	-0.001	1	6.38	0.72	K	HSTIFENLANKADR	D
4	gi|37747855	Transferrin [Homo sapiens]	2445	77030	144	97	72	58	72.2	989	1	0	0	851.899	1701.78	2	1701.78	0.0014	1	82.13	4.4e-08	R	KCSTSSLLEACTFR	R
4	gi|37747855	Transferrin [Homo sapiens]	2445	77030	144	97	72	58	72.2	990	1	0	0	851.899	1701.78	2	1701.78	0.003	1	29.95	0.0016	R	KCSTSSLLEACTFR	R
4	gi|37747855	Transferrin [Homo sapiens]	2445	77030	144	97	72	58	72.2	998	1	0	1	853.888	1705.76	2	1705.76	0.0027	0	74.01	1.4e-06	K	LCMGSGLNLCEPNNK	E
4	gi|37747855	Transferrin [Homo sapiens]	2445	77030	144	97	72	58	72.2	1027	1	0	0	863.389	1724.76	2	1724.76	0.003	0	70.91	5.3e-06	K	IECVSAETTEDCIAK	I
4	gi|37747855	Transferrin [Homo sapiens]	2445	77030	144	97	72	58	72.2	1052	1	0	0	874.885	1747.75	2	1747.75	0.0033	1	33.97	0.0031	R	FDEFFSEGCAPGSKK	D
4	gi|37747855	Transferrin [Homo sapiens]	2445	77030	144	97	72	58	72.2	1053	1	0	1	875.389	1748.76	2	1748.76	0.0001	0	27.9	0.0024	K	LCMGSGLNLCEPNNK	E
4	gi|37747855	Transferrin [Homo sapiens]	2445	77030	144	97	72	58	72.2	1075	1	0	0	884.892	1767.77	2	1767.77	0.0039	0	26.38	0.0034	K	IECVSAETTEDCIAK	I
4	gi|37747855	Transferrin [Homo sapiens]	2445	77030	144	97	72	58	72.2	1119	1	0	0	900.961	1799.91	2	1799.91	-0.0023	1	9.37	0.61	K	EDPQTFYYAVAVVKK	D
4	gi|37747855	Transferrin [Homo sapiens]	2445	77030	144	97	72	58	72.2	1212	1	0	0	932.453	1862.89	2	1862.89	0.0005	2	41.77	0.00012	K	DKSKEFQLFSSPHGK	D
4	gi|37747855	Transferrin [Homo sapiens]	2445	77030	144	97	72	58	72.2	1244	1	0	0	941.441	1880.87	2	1880.87	-0.001	1	64.6	5.8e-06	K	ADRDQYELLCLDNTR	K
4	gi|37747855	Transferrin [Homo sapiens]	2445	77030	144	97	72	58	72.2	1301	1	0	0	642.302	1923.88	3	1923.87	0.01	1	18.84	0.085	K	ADRDQYELLCLDNTR	K
4	gi|37747855	Transferrin [Homo sapiens]	2445	77030	144	97	72	58	72.2	1302	1	0	0	962.952	1923.89	2	1923.87	0.015	1	27.09	0.011	K	ADRDQYELLCLDNTR	K
4	gi|37747855	Transferrin [Homo sapiens]	2445	77030	144	97	72	58	72.2	1312	1	0	0	646.004	1934.99	3	1934.99	0.0017	1	16.29	0.18	K	EFQLFSSPHGKDLLFK	D
4	gi|37747855	Transferrin [Homo sapiens]	2445	77030	144	97	72	58	72.2	1313	1	0	0	968.503	1934.99	2	1934.99	0.0028	1	21.99	0.01	K	EFQLFSSPHGKDLLFK	D
4	gi|37747855	Transferrin [Homo sapiens]	2445	77030	144	97	72	58	72.2	1339	1	0	0	976.974	1951.93	2	1951.93	0.0017	1	79.09	3e-05	K	NLNEKDYELLCLDGTR	K
4	gi|37747855	Transferrin [Homo sapiens]	2445	77030	144	97	72	58	72.2	1340	1	0	0	651.652	1951.93	3	1951.93	0.0039	1	37.06	0.018	K	NLNEKDYELLCLDGTR	K
4	gi|37747855	Transferrin [Homo sapiens]	2445	77030	144	97	72	58	72.2	1354	1	0	0	985.001	1967.99	2	1967.98	0.0059	1	44.68	0.00015	K	GDVAFVKHQTVPQNTGGK	N
4	gi|37747855	Transferrin [Homo sapiens]	2445	77030	144	97	72	58	72.2	1361	1	0	0	990.007	1978	2	1977.99	0.0044	1	14.54	0.058	K	EFQLFSSPHGKDLLFK	D
4	gi|37747855	Transferrin [Homo sapiens]	2445	77030	144	97	72	58	72.2	1378	1	0	0	998.479	1994.94	2	1994.94	0.0069	1	66.07	0.00069	K	NLNEKDYELLCLDGTR	K
4	gi|37747855	Transferrin [Homo sapiens]	2445	77030	144	97	72	58	72.2	1386	1	0	1	1006.98	2011.94	2	2011.95	-0.0005	1	52.34	1.3e-05	R	DHMKSVIPSDGPSVACVK	K
4	gi|37747855	Transferrin [Homo sapiens]	2445	77030	144	97	72	58	72.2	1401	1	0	0	680.302	2037.88	3	2037.88	0.0059	1	77.23	1.4e-07	R	WCAVSEHEATKCQSFR	D
4	gi|37747855	Transferrin [Homo sapiens]	2445	77030	144	97	72	58	72.2	1432	1	0	0	690.683	2069.03	3	2069.02	0.0045	0	29.92	0.0016	K	EDLIWELLNQAQEHFGK	D
4	gi|37747855	Transferrin [Homo sapiens]	2445	77030	144	97	72	58	72.2	1433	1	0	0	1035.52	2069.03	2	2069.02	0.0047	0	46.26	0.00075	K	EDLIWELLNQAQEHFGK	D
4	gi|37747855	Transferrin [Homo sapiens]	2445	77030	144	97	72	58	72.2	1438	1	0	0	1036.47	2070.92	2	2070.92	0.0008	0	41.21	0.00047	K	SDNCEDTPEAGYFAVAVVK	K
4	gi|37747855	Transferrin [Homo sapiens]	2445	77030	144	97	72	58	72.2	1450	1	0	0	1041.45	2080.88	2	2080.88	-0.0025	1	8.68	0.25	R	WCAVSEHEATKCQSFR	D
4	gi|37747855	Transferrin [Homo sapiens]	2445	77030	144	97	72	58	72.2	1475	1	0	0	1049.02	2096.02	2	2096.02	0.001	2	7.9	0.37	R	SETKDLLFRDDTVCLAK	L
4	gi|37747855	Transferrin [Homo sapiens]	2445	77030	144	97	72	58	72.2	1537	1	0	1	1080.02	2158.02	2	2158.01	0.0112	0	29.56	0.0021	K	IMNGEADAMSLDGGFVYIAGK	C
4	gi|37747855	Transferrin [Homo sapiens]	2445	77030	144	97	72	58	72.2	1549	1	0	0	724.372	2170.09	3	2170.09	0.0064	0	71.3	4.4e-06	R	SAGWNIPIGLLYCDLPEPR	K
4	gi|37747855	Transferrin [Homo sapiens]	2445	77030	144	97	72	58	72.2	1550	1	0	0	1086.06	2170.1	2	2170.09	0.009	0	60.29	1.8e-05	R	SAGWNIPIGLLYCDLPEPR	K
4	gi|37747855	Transferrin [Homo sapiens]	2445	77030	144	97	72	58	72.2	1556	1	0	0	725.032	2172.08	3	2172.07	0.0005	2	44.23	0.00032	K	DLLFRDDTVCLAKLHDR	N
4	gi|37747855	Transferrin [Homo sapiens]	2445	77030	144	97	72	58	72.2	1567	1	0	0	732.049	2193.13	3	2193.12	0.0039	2	4.39	0.55	K	SKEFQLFSSPHGKDLLFK	D
4	gi|37747855	Transferrin [Homo sapiens]	2445	77030	144	97	72	58	72.2	1571	1	0	1	1101.52	2201.02	2	2201.01	0.0042	0	13.49	0.066	K	IMNGEADAMSLDGGFVYIAGK	C
4	gi|37747855	Transferrin [Homo sapiens]	2445	77030	144	97	72	58	72.2	1586	1	0	0	1107.56	2213.1	2	2213.09	0.0033	0	45.38	0.00015	R	SAGWNIPIGLLYCDLPEPR	K
4	gi|37747855	Transferrin [Homo sapiens]	2445	77030	144	97	72	58	72.2	1662	1	0	1	767.719	2300.13	3	2300.13	0.0039	1	44.05	0.00035	R	TAGWNIPMGLLYNKINHCR	F
4	gi|37747855	Transferrin [Homo sapiens]	2445	77030	144	97	72	58	72.2	1663	1	0	1	1151.07	2300.13	2	2300.13	0.004	1	44.79	0.00056	R	TAGWNIPMGLLYNKINHCR	F
4	gi|37747855	Transferrin [Homo sapiens]	2445	77030	144	97	72	58	72.2	1693	1	0	0	778.056	2331.15	3	2331.15	-0.0042	2	16	0.27	R	NTYEKYLGEEYVKAVGNLR	K
4	gi|37747855	Transferrin [Homo sapiens]	2445	77030	144	97	72	58	72.2	1694	1	0	0	1166.58	2331.15	2	2331.15	-0.0006	2	56.18	0.00025	R	NTYEKYLGEEYVKAVGNLR	K
4	gi|37747855	Transferrin [Homo sapiens]	2445	77030	144	97	72	58	72.2	1701	1	0	1	782.054	2343.14	3	2343.14	0.0037	1	14.7	0.057	R	TAGWNIPMGLLYNKINHCR	F
4	gi|37747855	Transferrin [Homo sapiens]	2445	77030	144	97	72	58	72.2	1702	1	0	1	1172.58	2343.14	2	2343.14	0.005	1	7.96	0.18	R	TAGWNIPMGLLYNKINHCR	F
4	gi|37747855	Transferrin [Homo sapiens]	2445	77030	144	97	72	58	72.2	1710	1	0	0	786.055	2355.14	3	2355.15	-0.0066	1	9.07	0.18	K	EDLIWELLNQAQEHFGKDK	S
4	gi|37747855	Transferrin [Homo sapiens]	2445	77030	144	97	72	58	72.2	1711	1	0	0	1178.58	2355.15	2	2355.15	0.0022	1	23.19	0.0088	K	EDLIWELLNQAQEHFGKDK	S
4	gi|37747855	Transferrin [Homo sapiens]	2445	77030	144	97	72	58	72.2	1739	1	0	0	800.393	2398.16	3	2398.16	0.0016	1	2.23	0.9	K	EDLIWELLNQAQEHFGKDK	S
4	gi|37747855	Transferrin [Homo sapiens]	2445	77030	144	97	72	58	72.2	1740	1	0	0	1200.09	2398.16	2	2398.16	0.0019	1	4.19	0.57	K	EDLIWELLNQAQEHFGKDK	S
4	gi|37747855	Transferrin [Homo sapiens]	2445	77030	144	97	72	58	72.2	1825	1	0	1	844.085	2529.23	3	2529.23	0.0013	1	42.4	0.00073	R	SMGGKEDLIWELLNQAQEHFGK	D
4	gi|37747855	Transferrin [Homo sapiens]	2445	77030	144	97	72	58	72.2	1847	1	0	1	637.315	2545.23	4	2545.23	0.0034	1	1.27	0.76	R	SMGGKEDLIWELLNQAQEHFGK	D
4	gi|37747855	Transferrin [Homo sapiens]	2445	77030	144	97	72	58	72.2	1852	1	0	0	638.08	2548.29	4	2548.29	0.0033	1	60.71	2.5e-06	R	KPVDEYKDCHLAQVPSHTVVAR	S
4	gi|37747855	Transferrin [Homo sapiens]	2445	77030	144	97	72	58	72.2	1869	1	0	1	858.419	2572.23	3	2572.24	-0.0037	1	5.46	0.49	R	SMGGKEDLIWELLNQAQEHFGK	D
4	gi|37747855	Transferrin [Homo sapiens]	2445	77030	144	97	72	58	72.2	1870	1	0	1	1287.13	2572.24	2	2572.24	-0.0003	1	25.58	0.004	R	SMGGKEDLIWELLNQAQEHFGK	D
4	gi|37747855	Transferrin [Homo sapiens]	2445	77030	144	97	72	58	72.2	1871	1	0	1	858.421	2572.24	3	2572.24	0.0029	1	41.22	0.00027	R	SMGGKEDLIWELLNQAQEHFGK	D
4	gi|37747855	Transferrin [Homo sapiens]	2445	77030	144	97	72	58	72.2	1872	1	0	1	1287.13	2572.24	2	2572.24	0.0053	1	33.27	0.0019	R	SMGGKEDLIWELLNQAQEHFGK	D
4	gi|37747855	Transferrin [Homo sapiens]	2445	77030	144	97	72	58	72.2	1873	3	0	1	858.422	2572.24	3	2572.24	0.0062	1	1.62	1	R	SMGGKEDLIWELLNQAQEHFGK	D
4	gi|37747855	Transferrin [Homo sapiens]	2445	77030	144	97	72	58	72.2	1893	1	0	1	863.752	2588.23	3	2588.23	0.0016	1	19.08	0.016	R	SMGGKEDLIWELLNQAQEHFGK	D
4	gi|37747855	Transferrin [Homo sapiens]	2445	77030	144	97	72	58	72.2	1897	1	0	0	648.832	2591.3	4	2591.29	0.007	1	48.51	3.2e-05	R	KPVDEYKDCHLAQVPSHTVVAR	S
4	gi|37747855	Transferrin [Homo sapiens]	2445	77030	144	97	72	58	72.2	1901	1	0	0	866.775	2597.3	3	2597.3	0.0026	2	22.78	0.36	R	CLVEKGDVAFVKHQTVPQNTGGK	N
4	gi|37747855	Transferrin [Homo sapiens]	2445	77030	144	97	72	58	72.2	1912	1	0	0	1304.65	2607.28	2	2607.28	-0.0009	2	40.71	0.06	K	SVIPSDGPSVACVKKASYLDCIR	A
4	gi|37747855	Transferrin [Homo sapiens]	2445	77030	144	97	72	58	72.2	1913	1	0	0	870.101	2607.28	3	2607.28	0.0033	2	27.23	0.26	K	SVIPSDGPSVACVKKASYLDCIR	A
4	gi|37747855	Transferrin [Homo sapiens]	2445	77030	144	97	72	58	72.2	1917	1	0	1	872.753	2615.24	3	2615.24	-0.0054	1	1.61	0.74	R	SMGGKEDLIWELLNQAQEHFGK	D
4	gi|37747855	Transferrin [Homo sapiens]	2445	77030	144	97	72	58	72.2	1934	1	0	0	879.107	2634.3	3	2634.3	0.0019	1	50.4	0.021	R	KPVDEYKDCHLAQVPSHTVVAR	S
4	gi|37747855	Transferrin [Homo sapiens]	2445	77030	144	97	72	58	72.2	1935	1	0	0	659.582	2634.3	4	2634.3	0.0032	1	20.34	0.76	R	KPVDEYKDCHLAQVPSHTVVAR	S
4	gi|37747855	Transferrin [Homo sapiens]	2445	77030	144	97	72	58	72.2	1949	1	0	0	886.436	2656.29	3	2656.29	-0.0013	2	4.69	0.52	K	EDLIWELLNQAQEHFGKDKSK	E
4	gi|37747855	Transferrin [Homo sapiens]	2445	77030	144	97	72	58	72.2	1964	1	0	0	893.443	2677.31	3	2677.3	0.0056	1	59.46	2.7e-06	R	KPVDEYKDCHLAQVPSHTVVAR	S
4	gi|37747855	Transferrin [Homo sapiens]	2445	77030	144	97	72	58	72.2	2034	1	0	0	935.448	2803.32	3	2803.32	-0.0004	2	88.49	9e-09	K	NPDPWAKNLNEKDYELLCLDGTR	K
4	gi|37747855	Transferrin [Homo sapiens]	2445	77030	144	97	72	58	72.2	2037	1	0	1	939.454	2815.34	3	2815.36	-0.0209	2	12.81	0.063	R	SMGGKEDLIWELLNQAQEHFGKDK	S
4	gi|37747855	Transferrin [Homo sapiens]	2445	77030	144	97	72	58	72.2	2038	1	0	1	939.461	2815.36	3	2815.36	0.0019	2	20.71	0.011	R	SMGGKEDLIWELLNQAQEHFGKDK	S
4	gi|37747855	Transferrin [Homo sapiens]	2445	77030	144	97	72	58	72.2	2039	1	0	1	704.848	2815.36	4	2815.36	0.0042	2	6.84	0.85	R	SMGGKEDLIWELLNQAQEHFGKDK	S
4	gi|37747855	Transferrin [Homo sapiens]	2445	77030	144	97	72	58	72.2	2041	1	0	1	704.85	2815.37	4	2815.36	0.011	2	10.84	0.096	R	SMGGKEDLIWELLNQAQEHFGKDK	S
4	gi|37747855	Transferrin [Homo sapiens]	2445	77030	144	97	72	58	72.2	2051	1	0	0	709.363	2833.42	4	2833.42	0.0025	2	21.77	0.12	K	EFQLFSSPHGKDLLFKDSAHGFLK	V
4	gi|37747855	Transferrin [Homo sapiens]	2445	77030	144	97	72	58	72.2	2052	1	0	0	945.481	2833.42	3	2833.42	0.0036	2	25.81	0.018	K	EFQLFSSPHGKDLLFKDSAHGFLK	V
4	gi|37747855	Transferrin [Homo sapiens]	2445	77030	144	97	72	58	72.2	2072	1	0	1	953.797	2858.37	3	2858.37	0.0032	2	33.11	0.00079	R	SMGGKEDLIWELLNQAQEHFGKDK	S
4	gi|37747855	Transferrin [Homo sapiens]	2445	77030	144	97	72	58	72.2	2073	1	0	1	953.797	2858.37	3	2858.37	0.0041	2	26.38	0.017	R	SMGGKEDLIWELLNQAQEHFGKDK	S
4	gi|37747855	Transferrin [Homo sapiens]	2445	77030	144	97	72	58	72.2	2083	1	0	0	959.816	2876.43	3	2876.42	0.0028	2	12.23	0.081	K	EFQLFSSPHGKDLLFKDSAHGFLK	V
4	gi|37747855	Transferrin [Homo sapiens]	2445	77030	144	97	72	58	72.2	2187	1	0	0	795.636	3178.51	4	3178.51	0.0032	2	30.69	0.0016	K	HSTIFENLANKADRDQYELLCLDNTR	K
4	gi|37747855	Transferrin [Homo sapiens]	2445	77030	144	97	72	58	72.2	2188	1	0	0	1060.51	3178.52	3	3178.51	0.007	2	32.48	0.18	K	HSTIFENLANKADRDQYELLCLDNTR	K
4	gi|37747855	Transferrin [Homo sapiens]	2445	77030	144	97	72	58	72.2	2205	1	0	0	806.387	3221.52	4	3221.52	0.0034	2	43.92	0.00022	K	HSTIFENLANKADRDQYELLCLDNTR	K
4	gi|37747855	Transferrin [Homo sapiens]	2445	77030	144	97	72	58	72.2	2206	1	0	0	1074.85	3221.52	3	3221.52	0.0077	2	9.01	0.14	K	HSTIFENLANKADRDQYELLCLDNTR	K
4	gi|37747855	Transferrin [Homo sapiens]	2445	77030	144	97	72	58	72.2	2315	1	0	0	989.26	3953.01	4	3953.01	0.0027	0	61.54	1.7e-06	R	AIAANEADAVTLDAGLVYDAYLAPNNLKPVVAEFYGSK	E
4	gi|37747855	Transferrin [Homo sapiens]	2445	77030	144	97	72	58	72.2	2316	1	0	0	1318.68	3953.02	3	3953.01	0.006	0	45.29	5.7e-05	R	AIAANEADAVTLDAGLVYDAYLAPNNLKPVVAEFYGSK	E
4	gi|37747855	Transferrin [Homo sapiens]	2445	77030	144	97	72	58	72.2	2317	1	0	0	1333.01	3996.02	3	3996.02	0.0001	0	47.34	3.6e-05	R	AIAANEADAVTLDAGLVYDAYLAPNNLKPVVAEFYGSK	E
4	gi|37747855	Transferrin [Homo sapiens]	2445	77030	144	97	72	58	72.2	2318	1	0	0	1000.01	3996.02	4	3996.02	0.0033	0	44.58	0.0003	R	AIAANEADAVTLDAGLVYDAYLAPNNLKPVVAEFYGSK	E
4	gi|115394517	transferrin [Homo sapiens]	2386	76910	138	93	75	58	72.9	10	3	0	0	706.39	705.383	1	705.381	0.0022	0	19.57	1.2	K	DLLFR	D
4	gi|115394517	transferrin [Homo sapiens]	2386	76910	138	93	75	58	72.9	72	1	0	0	459.228	916.441	2	916.44	0.0008	0	10.26	0.43	K	DSAHGFLK	V
4	gi|115394517	transferrin [Homo sapiens]	2386	76910	138	93	75	58	72.9	111	2	0	0	489.748	977.481	2	977.482	-0.0006	0	17.82	1.1	K	DGAGDVAFVK	H
4	gi|115394517	transferrin [Homo sapiens]	2386	76910	138	93	75	58	72.9	123	1	0	0	499.243	996.47	2	996.47	0.0006	0	23.33	0.051	K	ASYLDCIR	A
4	gi|115394517	transferrin [Homo sapiens]	2386	76910	138	93	75	58	72.9	126	5	0	0	500.753	999.492	2	999.491	0.0008	0	3.53	1.1	K	YLGEEYVK	A
4	gi|115394517	transferrin [Homo sapiens]	2386	76910	138	93	75	58	72.9	223	1	0	0	563.291	1124.57	2	1124.56	0.002	1	31.63	0.062	K	KASYLDCIR	A
4	gi|115394517	transferrin [Homo sapiens]	2386	76910	138	93	75	58	72.9	256	1	0	0	576.308	1150.6	2	1150.6	0.0036	1	38.44	0.048	R	SETKDLLFR	D
4	gi|115394517	transferrin [Homo sapiens]	2386	76910	138	93	75	58	72.9	276	1	0	0	584.793	1167.57	2	1167.57	0.0014	1	46.3	0.0013	K	KASYLDCIR	A
4	gi|115394517	transferrin [Homo sapiens]	2386	76910	138	93	75	58	72.9	299	1	0	1	598.281	1194.55	2	1194.55	0.0021	0	53.06	0.00021	K	DSGFQMNQLR	G
4	gi|115394517	transferrin [Homo sapiens]	2386	76910	138	93	75	58	72.9	321	1	0	0	606.319	1210.62	2	1210.62	-0.0008	1	25.67	0.17	K	EACVHKILR	Q
4	gi|115394517	transferrin [Homo sapiens]	2386	76910	138	93	75	58	72.9	364	1	0	0	413.52	1237.54	3	1237.54	-0.0026	0	24.82	0.021	K	WCALSHHER	L
4	gi|115394517	transferrin [Homo sapiens]	2386	76910	138	93	75	58	72.9	380	1	0	0	625.308	1248.6	2	1248.6	0.0032	0	49.02	0.0026	K	SASDLTWDNLK	G
4	gi|115394517	transferrin [Homo sapiens]	2386	76910	138	93	75	58	72.9	407	1	0	0	637.333	1272.65	2	1272.65	0.0058	0	66.22	2.2e-06	K	HSTIFENLANK	A
4	gi|115394517	transferrin [Homo sapiens]	2386	76910	138	93	75	58	72.9	418	1	0	0	638.821	1275.63	2	1275.62	0.0035	0	42.75	0.0011	K	EFQLFSSPHGK	D
4	gi|115394517	transferrin [Homo sapiens]	2386	76910	138	93	75	58	72.9	426	1	0	0	640.783	1279.55	2	1279.55	0.0013	0	29.83	0.013	K	CDEWSVNSVGK	I
4	gi|115394517	transferrin [Homo sapiens]	2386	76910	138	93	75	58	72.9	469	1	0	0	658.835	1315.65	2	1315.65	0.0024	0	50.87	5e-05	K	HSTIFENLANK	A
4	gi|115394517	transferrin [Homo sapiens]	2386	76910	138	93	75	58	72.9	472	1	0	0	660.324	1318.63	2	1318.63	0.0034	0	48.26	0.00068	K	EFQLFSSPHGK	D
4	gi|115394517	transferrin [Homo sapiens]	2386	76910	138	93	75	58	72.9	520	1	0	0	677.845	1353.67	2	1353.62	0.0512	0	32.53	0.0083	K	DYELLCLDGTR	K
4	gi|115394517	transferrin [Homo sapiens]	2386	76910	138	93	75	58	72.9	526	1	0	0	680.803	1359.59	2	1359.59	0.0033	0	38.11	0.0017	R	WCAVSEHEATK	C
4	gi|115394517	transferrin [Homo sapiens]	2386	76910	138	93	75	58	72.9	533	1	0	1	683.835	1365.66	2	1365.65	0.0095	1	60.88	2.3e-05	K	KDSGFQMNQLR	G
4	gi|115394517	transferrin [Homo sapiens]	2386	76910	138	93	75	58	72.9	570	1	0	0	704.37	1406.73	2	1406.72	0.0035	1	42.57	0.057	R	CLVEKGDVAFVK	H
4	gi|115394517	transferrin [Homo sapiens]	2386	76910	138	93	75	58	72.9	571	1	0	0	704.371	1406.73	2	1406.72	0.0045	1	7.52	0.53	R	CLVEKGDVAFVK	H
4	gi|115394517	transferrin [Homo sapiens]	2386	76910	138	93	75	58	72.9	575	1	0	0	705.371	1408.73	2	1408.72	0.0061	1	16.48	0.085	K	DSAHGFLKVPPR	M
4	gi|115394517	transferrin [Homo sapiens]	2386	76910	138	93	75	58	72.9	583	1	0	0	471.253	1410.74	3	1410.74	-0.0018	2	18.54	0.057	K	DKEACVHKILR	Q
4	gi|115394517	transferrin [Homo sapiens]	2386	76910	138	93	75	58	72.9	588	1	0	0	708.365	1414.71	2	1414.71	0.002	0	76.46	6.1e-05	K	SVIPSDGPSVACVK	K
4	gi|115394517	transferrin [Homo sapiens]	2386	76910	138	93	75	58	72.9	596	1	0	0	710.853	1419.69	2	1419.7	-0.0073	1	33.95	0.0053	K	KSASDLTWDNLK	G
4	gi|115394517	transferrin [Homo sapiens]	2386	76910	138	93	75	58	72.9	628	1	0	0	725.869	1449.72	2	1449.73	-0.0058	1	29.48	0.0072	R	CLVEKGDVAFVK	H
4	gi|115394517	transferrin [Homo sapiens]	2386	76910	138	93	75	58	72.9	632	1	0	0	727.881	1453.75	2	1453.75	0.0015	2	37.55	0.43	K	DKEACVHKILR	Q
4	gi|115394517	transferrin [Homo sapiens]	2386	76910	138	93	75	58	72.9	647	1	0	0	733.364	1464.71	2	1464.7	0.0093	1	31.19	0.003	K	CLKDGAGDVAFVK	H
4	gi|115394517	transferrin [Homo sapiens]	2386	76910	138	93	75	58	72.9	662	1	0	0	739.368	1476.72	2	1476.72	0.001	1	41.53	0.2	K	SASDLTWDNLKGK	K
4	gi|115394517	transferrin [Homo sapiens]	2386	76910	138	93	75	58	72.9	665	1	0	1	739.872	1477.73	2	1477.73	0.0011	0	76.93	9.6e-08	K	MYLGYEYVTAIR	N
4	gi|115394517	transferrin [Homo sapiens]	2386	76910	138	93	75	58	72.9	666	1	0	1	739.872	1477.73	2	1477.73	0.0015	0	68.41	1e-06	K	MYLGYEYVTAIR	N
4	gi|115394517	transferrin [Homo sapiens]	2386	76910	138	93	75	58	72.9	672	1	0	0	743.361	1484.71	2	1484.7	0.0039	1	51.57	0.018	R	DDTVCLAKLHDR	N
4	gi|115394517	transferrin [Homo sapiens]	2386	76910	138	93	75	58	72.9	680	1	0	0	497.925	1490.75	3	1490.75	-0.0001	1	2.08	0.64	K	SKEFQLFSSPHGK	D
4	gi|115394517	transferrin [Homo sapiens]	2386	76910	138	93	75	58	72.9	685	1	0	1	747.867	1493.72	2	1493.72	-0.0024	0	46.76	5.5e-05	K	MYLGYEYVTAIR	N
4	gi|115394517	transferrin [Homo sapiens]	2386	76910	138	93	75	58	72.9	691	1	0	0	749.384	1496.75	2	1496.75	0.0011	2	36.35	0.0025	K	DKEACVHKILR	Q
4	gi|115394517	transferrin [Homo sapiens]	2386	76910	138	93	75	58	72.9	726	1	0	0	761.372	1520.73	2	1520.73	0.0009	1	78.26	7.2e-07	R	LKCDEWSVNSVGK	I
4	gi|115394517	transferrin [Homo sapiens]	2386	76910	138	93	75	58	72.9	727	1	0	1	761.373	1520.73	2	1520.73	-0.0011	0	37.75	0.002	K	MYLGYEYVTAIR	N
4	gi|115394517	transferrin [Homo sapiens]	2386	76910	138	93	75	58	72.9	733	1	0	0	764.863	1527.71	2	1527.71	0.0021	1	38.93	0.0012	R	DDTVCLAKLHDR	N
4	gi|115394517	transferrin [Homo sapiens]	2386	76910	138	93	75	58	72.9	737	1	0	0	766.35	1530.69	2	1530.68	0.0048	0	79.28	1.4e-07	K	CSTSSLLEACTFR	R
4	gi|115394517	transferrin [Homo sapiens]	2386	76910	138	93	75	58	72.9	739	1	0	0	767.407	1532.8	2	1532.8	-0.0003	1	38.34	0.095	K	DLLFKDSAHGFLK	V
4	gi|115394517	transferrin [Homo sapiens]	2386	76910	138	93	75	58	72.9	742	1	0	0	767.887	1533.76	2	1533.76	0.0019	1	53.54	0.00072	K	SKEFQLFSSPHGK	D
4	gi|115394517	transferrin [Homo sapiens]	2386	76910	138	93	75	58	72.9	749	1	0	0	770.358	1538.7	2	1538.7	-0.0016	0	64.17	1.9e-05	R	DQYELLCLDNTR	K
4	gi|115394517	transferrin [Homo sapiens]	2386	76910	138	93	75	58	72.9	786	1	0	0	782.875	1563.74	2	1563.74	0.0005	1	78.15	4e-07	R	LKCDEWSVNSVGK	I
4	gi|115394517	transferrin [Homo sapiens]	2386	76910	138	93	75	58	72.9	789	1	0	0	783.403	1564.79	2	1564.79	-0.0011	1	41.01	0.0041	K	DLLFRDDTVCLAK	L
4	gi|115394517	transferrin [Homo sapiens]	2386	76910	138	93	75	58	72.9	802	1	0	0	787.851	1573.69	2	1573.69	0.0018	0	66.83	5e-06	K	CSTSSLLEACTFR	R
4	gi|115394517	transferrin [Homo sapiens]	2386	76910	138	93	75	58	72.9	805	1	0	0	788.908	1575.8	2	1575.8	-0.0037	1	25.08	0.045	K	DLLFKDSAHGFLK	V
4	gi|115394517	transferrin [Homo sapiens]	2386	76910	138	93	75	58	72.9	810	1	0	0	789.335	1576.65	2	1576.65	0.0044	0	102	1.2e-09	R	FDEFFSEGCAPGSK	K
4	gi|115394517	transferrin [Homo sapiens]	2386	76910	138	93	75	58	72.9	811	1	0	0	789.391	1576.77	2	1576.76	0.0043	1	53.38	0.00011	K	SKEFQLFSSPHGK	D
4	gi|115394517	transferrin [Homo sapiens]	2386	76910	138	93	75	58	72.9	813	1	0	1	789.411	1576.81	2	1576.81	0.0007	0	57.73	3.7e-05	R	TAGWNIPMGLLYNK	I
4	gi|115394517	transferrin [Homo sapiens]	2386	76910	138	93	75	58	72.9	819	1	0	0	529.596	1585.77	3	1585.77	-0.0012	0	76.27	3.1e-07	R	KPVEEYANCHLAR	A
4	gi|115394517	transferrin [Homo sapiens]	2386	76910	138	93	75	58	72.9	820	1	0	0	793.915	1585.82	2	1585.81	0.0026	1	35.81	0.7	K	SVIPSDGPSVACVKK	A
4	gi|115394517	transferrin [Homo sapiens]	2386	76910	138	93	75	58	72.9	851	1	0	0	804.378	1606.74	2	1606.74	-0.0003	1	43.29	0.00029	R	LKCDEWSVNSVGK	I
4	gi|115394517	transferrin [Homo sapiens]	2386	76910	138	93	75	58	72.9	874	1	0	0	810.835	1619.65	2	1619.66	-0.0016	0	39.42	0.00029	R	FDEFFSEGCAPGSK	K
4	gi|115394517	transferrin [Homo sapiens]	2386	76910	138	93	75	58	72.9	889	1	0	0	815.393	1628.77	2	1628.77	-0.0022	0	72.88	7.8e-07	R	KPVEEYANCHLAR	A
4	gi|115394517	transferrin [Homo sapiens]	2386	76910	138	93	75	58	72.9	890	1	0	0	543.931	1628.77	3	1628.77	-0.0005	0	50.69	5.5e-05	R	KPVEEYANCHLAR	A
4	gi|115394517	transferrin [Homo sapiens]	2386	76910	138	93	75	58	72.9	891	1	0	0	543.932	1628.77	3	1628.77	-0.0002	0	58.59	1.9e-05	R	KPVEEYANCHLAR	A
4	gi|115394517	transferrin [Homo sapiens]	2386	76910	138	93	75	58	72.9	892	1	0	0	815.411	1628.81	2	1628.81	-0.0004	0	53.5	5.5e-05	K	EDPQTFYYAVAVVK	K
4	gi|115394517	transferrin [Homo sapiens]	2386	76910	138	93	75	58	72.9	918	1	0	0	824.919	1647.82	2	1647.82	0.002	2	10.62	0.54	K	SASDLTWDNLKGKK	S
4	gi|115394517	transferrin [Homo sapiens]	2386	76910	138	93	75	58	72.9	921	1	0	0	827.433	1652.85	2	1652.85	0.0003	1	43.77	0.1	K	YLGEEYVKAVGNLR	K
4	gi|115394517	transferrin [Homo sapiens]	2386	76910	138	93	75	58	72.9	928	1	0	0	829.915	1657.82	2	1657.82	-0.002	1	63.28	8.7e-05	K	HSTIFENLANKADR	D
4	gi|115394517	transferrin [Homo sapiens]	2386	76910	138	93	75	58	72.9	948	1	0	0	836.898	1671.78	2	1671.78	0.0021	0	52.91	9.8e-05	R	KPVEEYANCHLAR	A
4	gi|115394517	transferrin [Homo sapiens]	2386	76910	138	93	75	58	72.9	949	1	0	0	836.913	1671.81	2	1671.81	-0.004	0	30.47	0.0014	K	EDPQTFYYAVAVVK	K
4	gi|115394517	transferrin [Homo sapiens]	2386	76910	138	93	75	58	72.9	963	1	0	0	839.904	1677.79	2	1677.79	0.0047	1	40.27	0.026	R	NTYEKYLGEEYVK	A
4	gi|115394517	transferrin [Homo sapiens]	2386	76910	138	93	75	58	72.9	971	1	0	0	563.955	1688.84	3	1688.84	0	0	47.31	0.00016	K	DCHLAQVPSHTVVAR	S
4	gi|115394517	transferrin [Homo sapiens]	2386	76910	138	93	75	58	72.9	983	1	0	0	848.935	1695.86	2	1695.86	-0.003	1	37.58	0.00069	K	YLGEEYVKAVGNLR	K
4	gi|115394517	transferrin [Homo sapiens]	2386	76910	138	93	75	58	72.9	988	2	0	0	851.418	1700.82	2	1700.82	-0.001	1	6.38	0.72	K	HSTIFENLANKADR	D
4	gi|115394517	transferrin [Homo sapiens]	2386	76910	138	93	75	58	72.9	989	1	0	0	851.899	1701.78	2	1701.78	0.0014	1	82.13	4.4e-08	R	KCSTSSLLEACTFR	R
4	gi|115394517	transferrin [Homo sapiens]	2386	76910	138	93	75	58	72.9	990	1	0	0	851.899	1701.78	2	1701.78	0.003	1	29.95	0.0016	R	KCSTSSLLEACTFR	R
4	gi|115394517	transferrin [Homo sapiens]	2386	76910	138	93	75	58	72.9	998	1	0	1	853.888	1705.76	2	1705.76	0.0027	0	74.01	1.4e-06	K	LCMGSGLNLCEPNNK	E
4	gi|115394517	transferrin [Homo sapiens]	2386	76910	138	93	75	58	72.9	1027	1	0	0	863.389	1724.76	2	1724.76	0.003	0	70.91	5.3e-06	K	IECVSAETTEDCIAK	I
4	gi|115394517	transferrin [Homo sapiens]	2386	76910	138	93	75	58	72.9	1052	1	0	0	874.885	1747.75	2	1747.75	0.0033	1	33.97	0.0031	R	FDEFFSEGCAPGSKK	D
4	gi|115394517	transferrin [Homo sapiens]	2386	76910	138	93	75	58	72.9	1053	1	0	1	875.389	1748.76	2	1748.76	0.0001	0	27.9	0.0024	K	LCMGSGLNLCEPNNK	E
4	gi|115394517	transferrin [Homo sapiens]	2386	76910	138	93	75	58	72.9	1075	1	0	0	884.892	1767.77	2	1767.77	0.0039	0	26.38	0.0034	K	IECVSAETTEDCIAK	I
4	gi|115394517	transferrin [Homo sapiens]	2386	76910	138	93	75	58	72.9	1119	1	0	0	900.961	1799.91	2	1799.91	-0.0023	1	9.37	0.61	K	EDPQTFYYAVAVVKK	D
4	gi|115394517	transferrin [Homo sapiens]	2386	76910	138	93	75	58	72.9	1208	1	0	0	930.91	1859.8	2	1859.8	0.0017	0	40.62	0.0003	R	EGTCPEAPTDECKPVK	W
4	gi|115394517	transferrin [Homo sapiens]	2386	76910	138	93	75	58	72.9	1212	1	0	0	932.453	1862.89	2	1862.89	0.0005	2	41.77	0.00012	K	DKSKEFQLFSSPHGK	D
4	gi|115394517	transferrin [Homo sapiens]	2386	76910	138	93	75	58	72.9	1244	1	0	0	941.441	1880.87	2	1880.87	-0.001	1	64.6	5.8e-06	K	ADRDQYELLCLDNTR	K
4	gi|115394517	transferrin [Homo sapiens]	2386	76910	138	93	75	58	72.9	1301	1	0	0	642.302	1923.88	3	1923.87	0.01	1	18.84	0.085	K	ADRDQYELLCLDNTR	K
4	gi|115394517	transferrin [Homo sapiens]	2386	76910	138	93	75	58	72.9	1302	1	0	0	962.952	1923.89	2	1923.87	0.015	1	27.09	0.011	K	ADRDQYELLCLDNTR	K
4	gi|115394517	transferrin [Homo sapiens]	2386	76910	138	93	75	58	72.9	1312	1	0	0	646.004	1934.99	3	1934.99	0.0017	1	16.29	0.18	K	EFQLFSSPHGKDLLFK	D
4	gi|115394517	transferrin [Homo sapiens]	2386	76910	138	93	75	58	72.9	1313	1	0	0	968.503	1934.99	2	1934.99	0.0028	1	21.99	0.01	K	EFQLFSSPHGKDLLFK	D
4	gi|115394517	transferrin [Homo sapiens]	2386	76910	138	93	75	58	72.9	1339	1	0	0	976.974	1951.93	2	1951.93	0.0017	1	79.09	3e-05	K	NLNEKDYELLCLDGTR	K
4	gi|115394517	transferrin [Homo sapiens]	2386	76910	138	93	75	58	72.9	1340	1	0	0	651.652	1951.93	3	1951.93	0.0039	1	37.06	0.018	K	NLNEKDYELLCLDGTR	K
4	gi|115394517	transferrin [Homo sapiens]	2386	76910	138	93	75	58	72.9	1354	1	0	0	985.001	1967.99	2	1967.98	0.0059	1	44.68	0.00015	K	GDVAFVKHQTVPQNTGGK	N
4	gi|115394517	transferrin [Homo sapiens]	2386	76910	138	93	75	58	72.9	1361	1	0	0	990.007	1978	2	1977.99	0.0044	1	14.54	0.058	K	EFQLFSSPHGKDLLFK	D
4	gi|115394517	transferrin [Homo sapiens]	2386	76910	138	93	75	58	72.9	1378	1	0	0	998.479	1994.94	2	1994.94	0.0069	1	66.07	0.00069	K	NLNEKDYELLCLDGTR	K
4	gi|115394517	transferrin [Homo sapiens]	2386	76910	138	93	75	58	72.9	1386	1	0	1	1006.98	2011.94	2	2011.95	-0.0005	1	52.34	1.3e-05	R	DHMKSVIPSDGPSVACVK	K
4	gi|115394517	transferrin [Homo sapiens]	2386	76910	138	93	75	58	72.9	1401	1	0	0	680.302	2037.88	3	2037.88	0.0059	1	77.23	1.4e-07	R	WCAVSEHEATKCQSFR	D
4	gi|115394517	transferrin [Homo sapiens]	2386	76910	138	93	75	58	72.9	1432	1	0	0	690.683	2069.03	3	2069.02	0.0045	0	29.92	0.0016	K	EDLIWELLNQAQEHFGK	D
4	gi|115394517	transferrin [Homo sapiens]	2386	76910	138	93	75	58	72.9	1433	1	0	0	1035.52	2069.03	2	2069.02	0.0047	0	46.26	0.00075	K	EDLIWELLNQAQEHFGK	D
4	gi|115394517	transferrin [Homo sapiens]	2386	76910	138	93	75	58	72.9	1450	1	0	0	1041.45	2080.88	2	2080.88	-0.0025	1	8.68	0.25	R	WCAVSEHEATKCQSFR	D
4	gi|115394517	transferrin [Homo sapiens]	2386	76910	138	93	75	58	72.9	1475	1	0	0	1049.02	2096.02	2	2096.02	0.001	2	7.9	0.37	R	SETKDLLFRDDTVCLAK	L
4	gi|115394517	transferrin [Homo sapiens]	2386	76910	138	93	75	58	72.9	1537	1	0	1	1080.02	2158.02	2	2158.01	0.0112	0	29.56	0.0021	K	IMNGEADAMSLDGGFVYIAGK	C
4	gi|115394517	transferrin [Homo sapiens]	2386	76910	138	93	75	58	72.9	1549	1	0	0	724.372	2170.09	3	2170.09	0.0064	0	71.3	4.4e-06	R	SAGWNIPIGLLYCDLPEPR	K
4	gi|115394517	transferrin [Homo sapiens]	2386	76910	138	93	75	58	72.9	1550	1	0	0	1086.06	2170.1	2	2170.09	0.009	0	60.29	1.8e-05	R	SAGWNIPIGLLYCDLPEPR	K
4	gi|115394517	transferrin [Homo sapiens]	2386	76910	138	93	75	58	72.9	1556	1	0	0	725.032	2172.08	3	2172.07	0.0005	2	44.23	0.00032	K	DLLFRDDTVCLAKLHDR	N
4	gi|115394517	transferrin [Homo sapiens]	2386	76910	138	93	75	58	72.9	1567	1	0	0	732.049	2193.13	3	2193.12	0.0039	2	4.39	0.55	K	SKEFQLFSSPHGKDLLFK	D
4	gi|115394517	transferrin [Homo sapiens]	2386	76910	138	93	75	58	72.9	1571	1	0	1	1101.52	2201.02	2	2201.01	0.0042	0	13.49	0.066	K	IMNGEADAMSLDGGFVYIAGK	C
4	gi|115394517	transferrin [Homo sapiens]	2386	76910	138	93	75	58	72.9	1586	1	0	0	1107.56	2213.1	2	2213.09	0.0033	0	45.38	0.00015	R	SAGWNIPIGLLYCDLPEPR	K
4	gi|115394517	transferrin [Homo sapiens]	2386	76910	138	93	75	58	72.9	1643	1	0	0	759.382	2275.12	3	2275.12	0	1	42.59	0.13	K	DGAGDVAFVKHSTIFENLANK	A
4	gi|115394517	transferrin [Homo sapiens]	2386	76910	138	93	75	58	72.9	1644	1	0	0	1138.57	2275.13	2	2275.12	0.0041	1	45.29	0.0072	K	DGAGDVAFVKHSTIFENLANK	A
4	gi|115394517	transferrin [Homo sapiens]	2386	76910	138	93	75	58	72.9	1662	1	0	1	767.719	2300.13	3	2300.13	0.0039	1	44.05	0.00035	R	TAGWNIPMGLLYNKINHCR	F
4	gi|115394517	transferrin [Homo sapiens]	2386	76910	138	93	75	58	72.9	1663	1	0	1	1151.07	2300.13	2	2300.13	0.004	1	44.79	0.00056	R	TAGWNIPMGLLYNKINHCR	F
4	gi|115394517	transferrin [Homo sapiens]	2386	76910	138	93	75	58	72.9	1686	1	0	0	773.718	2318.13	3	2318.13	0.0043	1	24.86	0.028	K	DGAGDVAFVKHSTIFENLANK	A
4	gi|115394517	transferrin [Homo sapiens]	2386	76910	138	93	75	58	72.9	1687	1	0	0	1160.07	2318.13	2	2318.13	0.0053	1	34.57	0.00089	K	DGAGDVAFVKHSTIFENLANK	A
4	gi|115394517	transferrin [Homo sapiens]	2386	76910	138	93	75	58	72.9	1693	1	0	0	778.056	2331.15	3	2331.15	-0.0042	2	16	0.27	R	NTYEKYLGEEYVKAVGNLR	K
4	gi|115394517	transferrin [Homo sapiens]	2386	76910	138	93	75	58	72.9	1694	1	0	0	1166.58	2331.15	2	2331.15	-0.0006	2	56.18	0.00025	R	NTYEKYLGEEYVKAVGNLR	K
4	gi|115394517	transferrin [Homo sapiens]	2386	76910	138	93	75	58	72.9	1701	1	0	1	782.054	2343.14	3	2343.14	0.0037	1	14.7	0.057	R	TAGWNIPMGLLYNKINHCR	F
4	gi|115394517	transferrin [Homo sapiens]	2386	76910	138	93	75	58	72.9	1702	1	0	1	1172.58	2343.14	2	2343.14	0.005	1	7.96	0.18	R	TAGWNIPMGLLYNKINHCR	F
4	gi|115394517	transferrin [Homo sapiens]	2386	76910	138	93	75	58	72.9	1710	1	0	0	786.055	2355.14	3	2355.15	-0.0066	1	9.07	0.18	K	EDLIWELLNQAQEHFGKDK	S
4	gi|115394517	transferrin [Homo sapiens]	2386	76910	138	93	75	58	72.9	1711	1	0	0	1178.58	2355.15	2	2355.15	0.0022	1	23.19	0.0088	K	EDLIWELLNQAQEHFGKDK	S
4	gi|115394517	transferrin [Homo sapiens]	2386	76910	138	93	75	58	72.9	1739	1	0	0	800.393	2398.16	3	2398.16	0.0016	1	2.23	0.9	K	EDLIWELLNQAQEHFGKDK	S
4	gi|115394517	transferrin [Homo sapiens]	2386	76910	138	93	75	58	72.9	1740	1	0	0	1200.09	2398.16	2	2398.16	0.0019	1	4.19	0.57	K	EDLIWELLNQAQEHFGKDK	S
4	gi|115394517	transferrin [Homo sapiens]	2386	76910	138	93	75	58	72.9	1852	1	0	0	638.08	2548.29	4	2548.29	0.0033	1	60.71	2.5e-06	R	KPVDEYKDCHLAQVPSHTVVAR	S
4	gi|115394517	transferrin [Homo sapiens]	2386	76910	138	93	75	58	72.9	1897	1	0	0	648.832	2591.3	4	2591.29	0.007	1	48.51	3.2e-05	R	KPVDEYKDCHLAQVPSHTVVAR	S
4	gi|115394517	transferrin [Homo sapiens]	2386	76910	138	93	75	58	72.9	1901	1	0	0	866.775	2597.3	3	2597.3	0.0026	2	22.78	0.36	R	CLVEKGDVAFVKHQTVPQNTGGK	N
4	gi|115394517	transferrin [Homo sapiens]	2386	76910	138	93	75	58	72.9	1912	1	0	0	1304.65	2607.28	2	2607.28	-0.0009	2	40.71	0.06	K	SVIPSDGPSVACVKKASYLDCIR	A
4	gi|115394517	transferrin [Homo sapiens]	2386	76910	138	93	75	58	72.9	1913	1	0	0	870.101	2607.28	3	2607.28	0.0033	2	27.23	0.26	K	SVIPSDGPSVACVKKASYLDCIR	A
4	gi|115394517	transferrin [Homo sapiens]	2386	76910	138	93	75	58	72.9	1934	1	0	0	879.107	2634.3	3	2634.3	0.0019	1	50.4	0.021	R	KPVDEYKDCHLAQVPSHTVVAR	S
4	gi|115394517	transferrin [Homo sapiens]	2386	76910	138	93	75	58	72.9	1935	1	0	0	659.582	2634.3	4	2634.3	0.0032	1	20.34	0.76	R	KPVDEYKDCHLAQVPSHTVVAR	S
4	gi|115394517	transferrin [Homo sapiens]	2386	76910	138	93	75	58	72.9	1949	1	0	0	886.436	2656.29	3	2656.29	-0.0013	2	4.69	0.52	K	EDLIWELLNQAQEHFGKDKSK	E
4	gi|115394517	transferrin [Homo sapiens]	2386	76910	138	93	75	58	72.9	1964	1	0	0	893.443	2677.31	3	2677.3	0.0056	1	59.46	2.7e-06	R	KPVDEYKDCHLAQVPSHTVVAR	S
4	gi|115394517	transferrin [Homo sapiens]	2386	76910	138	93	75	58	72.9	1994	1	0	0	907.453	2719.34	3	2719.34	-0.0016	2	30.28	0.51	K	CLKDGAGDVAFVKHSTIFENLANK	A
4	gi|115394517	transferrin [Homo sapiens]	2386	76910	138	93	75	58	72.9	2034	1	0	0	935.448	2803.32	3	2803.32	-0.0004	2	88.49	9e-09	K	NPDPWAKNLNEKDYELLCLDGTR	K
4	gi|115394517	transferrin [Homo sapiens]	2386	76910	138	93	75	58	72.9	2051	1	0	0	709.363	2833.42	4	2833.42	0.0025	2	21.77	0.12	K	EFQLFSSPHGKDLLFKDSAHGFLK	V
4	gi|115394517	transferrin [Homo sapiens]	2386	76910	138	93	75	58	72.9	2052	1	0	0	945.481	2833.42	3	2833.42	0.0036	2	25.81	0.018	K	EFQLFSSPHGKDLLFKDSAHGFLK	V
4	gi|115394517	transferrin [Homo sapiens]	2386	76910	138	93	75	58	72.9	2083	1	0	0	959.816	2876.43	3	2876.42	0.0028	2	12.23	0.081	K	EFQLFSSPHGKDLLFKDSAHGFLK	V
4	gi|115394517	transferrin [Homo sapiens]	2386	76910	138	93	75	58	72.9	2143	1	0	0	760.09	3036.33	4	3036.33	0.002	1	31.9	0.62	R	EGTCPEAPTDECKPVKWCALSHHER	L
4	gi|115394517	transferrin [Homo sapiens]	2386	76910	138	93	75	58	72.9	2161	1	0	0	770.842	3079.34	4	3079.33	0.0046	1	27.74	0.38	R	EGTCPEAPTDECKPVKWCALSHHER	L
4	gi|115394517	transferrin [Homo sapiens]	2386	76910	138	93	75	58	72.9	2187	1	0	0	795.636	3178.51	4	3178.51	0.0032	2	30.69	0.0016	K	HSTIFENLANKADRDQYELLCLDNTR	K
4	gi|115394517	transferrin [Homo sapiens]	2386	76910	138	93	75	58	72.9	2188	1	0	0	1060.51	3178.52	3	3178.51	0.007	2	32.48	0.18	K	HSTIFENLANKADRDQYELLCLDNTR	K
4	gi|115394517	transferrin [Homo sapiens]	2386	76910	138	93	75	58	72.9	2205	1	0	0	806.387	3221.52	4	3221.52	0.0034	2	43.92	0.00022	K	HSTIFENLANKADRDQYELLCLDNTR	K
4	gi|115394517	transferrin [Homo sapiens]	2386	76910	138	93	75	58	72.9	2206	1	0	0	1074.85	3221.52	3	3221.52	0.0077	2	9.01	0.14	K	HSTIFENLANKADRDQYELLCLDNTR	K
4	gi|115394517	transferrin [Homo sapiens]	2386	76910	138	93	75	58	72.9	2315	1	0	0	989.26	3953.01	4	3953.01	0.0027	0	61.54	1.7e-06	R	AIAANEADAVTLDAGLVYDAYLAPNNLKPVVAEFYGSK	E
4	gi|115394517	transferrin [Homo sapiens]	2386	76910	138	93	75	58	72.9	2316	1	0	0	1318.68	3953.02	3	3953.01	0.006	0	45.29	5.7e-05	R	AIAANEADAVTLDAGLVYDAYLAPNNLKPVVAEFYGSK	E
4	gi|115394517	transferrin [Homo sapiens]	2386	76910	138	93	75	58	72.9	2317	1	0	0	1333.01	3996.02	3	3996.02	0.0001	0	47.34	3.6e-05	R	AIAANEADAVTLDAGLVYDAYLAPNNLKPVVAEFYGSK	E
4	gi|115394517	transferrin [Homo sapiens]	2386	76910	138	93	75	58	72.9	2318	1	0	0	1000.01	3996.02	4	3996.02	0.0033	0	44.58	0.0003	R	AIAANEADAVTLDAGLVYDAYLAPNNLKPVVAEFYGSK	E
4	gi|62897069	transferrin variant [Homo sapiens]	2378	77030	150	98	77	60	70.9	10	3	0	0	706.39	705.383	1	705.381	0.0022	0	19.57	1.2	K	DLLFR	D
4	gi|62897069	transferrin variant [Homo sapiens]	2378	77030	150	98	77	60	70.9	72	1	0	0	459.228	916.441	2	916.44	0.0008	0	10.26	0.43	K	DSAHGFLK	V
4	gi|62897069	transferrin variant [Homo sapiens]	2378	77030	150	98	77	60	70.9	111	2	0	0	489.748	977.481	2	977.482	-0.0006	0	17.82	1.1	K	DGAGDVAFVK	H
4	gi|62897069	transferrin variant [Homo sapiens]	2378	77030	150	98	77	60	70.9	123	1	0	0	499.243	996.47	2	996.47	0.0006	0	23.33	0.051	K	ASYLDCIR	A
4	gi|62897069	transferrin variant [Homo sapiens]	2378	77030	150	98	77	60	70.9	126	5	0	0	500.753	999.492	2	999.491	0.0008	0	3.53	1.1	K	YLGEEYVK	A
4	gi|62897069	transferrin variant [Homo sapiens]	2378	77030	150	98	77	60	70.9	223	1	0	0	563.291	1124.57	2	1124.56	0.002	1	31.63	0.062	K	KASYLDCIR	A
4	gi|62897069	transferrin variant [Homo sapiens]	2378	77030	150	98	77	60	70.9	256	1	0	0	576.308	1150.6	2	1150.6	0.0036	1	38.44	0.048	R	SETKDLLFR	D
4	gi|62897069	transferrin variant [Homo sapiens]	2378	77030	150	98	77	60	70.9	276	1	0	0	584.793	1167.57	2	1167.57	0.0014	1	46.3	0.0013	K	KASYLDCIR	A
4	gi|62897069	transferrin variant [Homo sapiens]	2378	77030	150	98	77	60	70.9	299	1	0	1	598.281	1194.55	2	1194.55	0.0021	0	53.06	0.00021	K	DSGFQMNQLR	G
4	gi|62897069	transferrin variant [Homo sapiens]	2378	77030	150	98	77	60	70.9	321	1	0	0	606.319	1210.62	2	1210.62	-0.0008	1	25.67	0.17	K	EACVHKILR	Q
4	gi|62897069	transferrin variant [Homo sapiens]	2378	77030	150	98	77	60	70.9	364	1	0	0	413.52	1237.54	3	1237.54	-0.0026	0	24.82	0.021	K	WCALSHHER	L
4	gi|62897069	transferrin variant [Homo sapiens]	2378	77030	150	98	77	60	70.9	380	1	0	0	625.308	1248.6	2	1248.6	0.0032	0	49.02	0.0026	K	SASDLTWDNLK	G
4	gi|62897069	transferrin variant [Homo sapiens]	2378	77030	150	98	77	60	70.9	407	1	0	0	637.333	1272.65	2	1272.65	0.0058	0	66.22	2.2e-06	K	HSTIFENLANK	A
4	gi|62897069	transferrin variant [Homo sapiens]	2378	77030	150	98	77	60	70.9	418	1	0	0	638.821	1275.63	2	1275.62	0.0035	0	42.75	0.0011	K	EFQLFSSPHGK	D
4	gi|62897069	transferrin variant [Homo sapiens]	2378	77030	150	98	77	60	70.9	426	1	0	0	640.783	1279.55	2	1279.55	0.0013	0	29.83	0.013	K	CDEWSVNSVGK	I
4	gi|62897069	transferrin variant [Homo sapiens]	2378	77030	150	98	77	60	70.9	469	1	0	0	658.835	1315.65	2	1315.65	0.0024	0	50.87	5e-05	K	HSTIFENLANK	A
4	gi|62897069	transferrin variant [Homo sapiens]	2378	77030	150	98	77	60	70.9	472	1	0	0	660.324	1318.63	2	1318.63	0.0034	0	48.26	0.00068	K	EFQLFSSPHGK	D
4	gi|62897069	transferrin variant [Homo sapiens]	2378	77030	150	98	77	60	70.9	520	1	0	0	677.845	1353.67	2	1353.62	0.0512	0	32.53	0.0083	K	DYELLCLDGTR	K
4	gi|62897069	transferrin variant [Homo sapiens]	2378	77030	150	98	77	60	70.9	526	1	0	0	680.803	1359.59	2	1359.59	0.0033	0	38.11	0.0017	R	WCAVSEHEATK	C
4	gi|62897069	transferrin variant [Homo sapiens]	2378	77030	150	98	77	60	70.9	533	1	0	1	683.835	1365.66	2	1365.65	0.0095	1	60.88	2.3e-05	K	KDSGFQMNQLR	G
4	gi|62897069	transferrin variant [Homo sapiens]	2378	77030	150	98	77	60	70.9	570	1	0	0	704.37	1406.73	2	1406.72	0.0035	1	42.57	0.057	R	CLVEKGDVAFVK	H
4	gi|62897069	transferrin variant [Homo sapiens]	2378	77030	150	98	77	60	70.9	571	1	0	0	704.371	1406.73	2	1406.72	0.0045	1	7.52	0.53	R	CLVEKGDVAFVK	H
4	gi|62897069	transferrin variant [Homo sapiens]	2378	77030	150	98	77	60	70.9	575	1	0	0	705.371	1408.73	2	1408.72	0.0061	1	16.48	0.085	K	DSAHGFLKVPPR	M
4	gi|62897069	transferrin variant [Homo sapiens]	2378	77030	150	98	77	60	70.9	583	1	0	0	471.253	1410.74	3	1410.74	-0.0018	2	18.54	0.057	K	DKEACVHKILR	Q
4	gi|62897069	transferrin variant [Homo sapiens]	2378	77030	150	98	77	60	70.9	588	1	0	0	708.365	1414.71	2	1414.71	0.002	0	76.46	6.1e-05	K	SVIPSDGPSVACVK	K
4	gi|62897069	transferrin variant [Homo sapiens]	2378	77030	150	98	77	60	70.9	596	1	0	0	710.853	1419.69	2	1419.7	-0.0073	1	33.95	0.0053	K	KSASDLTWDNLK	G
4	gi|62897069	transferrin variant [Homo sapiens]	2378	77030	150	98	77	60	70.9	628	1	0	0	725.869	1449.72	2	1449.73	-0.0058	1	29.48	0.0072	R	CLVEKGDVAFVK	H
4	gi|62897069	transferrin variant [Homo sapiens]	2378	77030	150	98	77	60	70.9	632	1	0	0	727.881	1453.75	2	1453.75	0.0015	2	37.55	0.43	K	DKEACVHKILR	Q
4	gi|62897069	transferrin variant [Homo sapiens]	2378	77030	150	98	77	60	70.9	647	1	0	0	733.364	1464.71	2	1464.7	0.0093	1	31.19	0.003	K	CLKDGAGDVAFVK	H
4	gi|62897069	transferrin variant [Homo sapiens]	2378	77030	150	98	77	60	70.9	662	1	0	0	739.368	1476.72	2	1476.72	0.001	1	41.53	0.2	K	SASDLTWDNLKGK	K
4	gi|62897069	transferrin variant [Homo sapiens]	2378	77030	150	98	77	60	70.9	665	1	0	1	739.872	1477.73	2	1477.73	0.0011	0	76.93	9.6e-08	K	MYLGYEYVTAIR	N
4	gi|62897069	transferrin variant [Homo sapiens]	2378	77030	150	98	77	60	70.9	666	1	0	1	739.872	1477.73	2	1477.73	0.0015	0	68.41	1e-06	K	MYLGYEYVTAIR	N
4	gi|62897069	transferrin variant [Homo sapiens]	2378	77030	150	98	77	60	70.9	672	1	0	0	743.361	1484.71	2	1484.7	0.0039	1	51.57	0.018	R	DDTVCLAKLHDR	N
4	gi|62897069	transferrin variant [Homo sapiens]	2378	77030	150	98	77	60	70.9	680	1	0	0	497.925	1490.75	3	1490.75	-0.0001	1	2.08	0.64	K	SKEFQLFSSPHGK	D
4	gi|62897069	transferrin variant [Homo sapiens]	2378	77030	150	98	77	60	70.9	685	1	0	1	747.867	1493.72	2	1493.72	-0.0024	0	46.76	5.5e-05	K	MYLGYEYVTAIR	N
4	gi|62897069	transferrin variant [Homo sapiens]	2378	77030	150	98	77	60	70.9	691	1	0	0	749.384	1496.75	2	1496.75	0.0011	2	36.35	0.0025	K	DKEACVHKILR	Q
4	gi|62897069	transferrin variant [Homo sapiens]	2378	77030	150	98	77	60	70.9	726	1	0	0	761.372	1520.73	2	1520.73	0.0009	1	78.26	7.2e-07	R	LKCDEWSVNSVGK	I
4	gi|62897069	transferrin variant [Homo sapiens]	2378	77030	150	98	77	60	70.9	727	1	0	1	761.373	1520.73	2	1520.73	-0.0011	0	37.75	0.002	K	MYLGYEYVTAIR	N
4	gi|62897069	transferrin variant [Homo sapiens]	2378	77030	150	98	77	60	70.9	733	1	0	0	764.863	1527.71	2	1527.71	0.0021	1	38.93	0.0012	R	DDTVCLAKLHDR	N
4	gi|62897069	transferrin variant [Homo sapiens]	2378	77030	150	98	77	60	70.9	737	1	0	0	766.35	1530.69	2	1530.68	0.0048	0	79.28	1.4e-07	K	CSTSSLLEACTFR	R
4	gi|62897069	transferrin variant [Homo sapiens]	2378	77030	150	98	77	60	70.9	739	1	0	0	767.407	1532.8	2	1532.8	-0.0003	1	38.34	0.095	K	DLLFKDSAHGFLK	V
4	gi|62897069	transferrin variant [Homo sapiens]	2378	77030	150	98	77	60	70.9	742	1	0	0	767.887	1533.76	2	1533.76	0.0019	1	53.54	0.00072	K	SKEFQLFSSPHGK	D
4	gi|62897069	transferrin variant [Homo sapiens]	2378	77030	150	98	77	60	70.9	749	1	0	0	770.358	1538.7	2	1538.7	-0.0016	0	64.17	1.9e-05	R	DQYELLCLDNTR	K
4	gi|62897069	transferrin variant [Homo sapiens]	2378	77030	150	98	77	60	70.9	786	1	0	0	782.875	1563.74	2	1563.74	0.0005	1	78.15	4e-07	R	LKCDEWSVNSVGK	I
4	gi|62897069	transferrin variant [Homo sapiens]	2378	77030	150	98	77	60	70.9	789	1	0	0	783.403	1564.79	2	1564.79	-0.0011	1	41.01	0.0041	K	DLLFRDDTVCLAK	L
4	gi|62897069	transferrin variant [Homo sapiens]	2378	77030	150	98	77	60	70.9	802	1	0	0	787.851	1573.69	2	1573.69	0.0018	0	66.83	5e-06	K	CSTSSLLEACTFR	R
4	gi|62897069	transferrin variant [Homo sapiens]	2378	77030	150	98	77	60	70.9	805	1	0	0	788.908	1575.8	2	1575.8	-0.0037	1	25.08	0.045	K	DLLFKDSAHGFLK	V
4	gi|62897069	transferrin variant [Homo sapiens]	2378	77030	150	98	77	60	70.9	810	1	0	0	789.335	1576.65	2	1576.65	0.0044	0	102	1.2e-09	R	FDEFFSEGCAPGSK	K
4	gi|62897069	transferrin variant [Homo sapiens]	2378	77030	150	98	77	60	70.9	811	1	0	0	789.391	1576.77	2	1576.76	0.0043	1	53.38	0.00011	K	SKEFQLFSSPHGK	D
4	gi|62897069	transferrin variant [Homo sapiens]	2378	77030	150	98	77	60	70.9	813	1	0	1	789.411	1576.81	2	1576.81	0.0007	0	57.73	3.7e-05	R	TAGWNIPMGLLYNK	I
4	gi|62897069	transferrin variant [Homo sapiens]	2378	77030	150	98	77	60	70.9	819	1	0	0	529.596	1585.77	3	1585.77	-0.0012	0	76.27	3.1e-07	R	KPVEEYANCHLAR	A
4	gi|62897069	transferrin variant [Homo sapiens]	2378	77030	150	98	77	60	70.9	820	1	0	0	793.915	1585.82	2	1585.81	0.0026	1	35.81	0.7	K	SVIPSDGPSVACVKK	A
4	gi|62897069	transferrin variant [Homo sapiens]	2378	77030	150	98	77	60	70.9	851	1	0	0	804.378	1606.74	2	1606.74	-0.0003	1	43.29	0.00029	R	LKCDEWSVNSVGK	I
4	gi|62897069	transferrin variant [Homo sapiens]	2378	77030	150	98	77	60	70.9	874	1	0	0	810.835	1619.65	2	1619.66	-0.0016	0	39.42	0.00029	R	FDEFFSEGCAPGSK	K
4	gi|62897069	transferrin variant [Homo sapiens]	2378	77030	150	98	77	60	70.9	889	1	0	0	815.393	1628.77	2	1628.77	-0.0022	0	72.88	7.8e-07	R	KPVEEYANCHLAR	A
4	gi|62897069	transferrin variant [Homo sapiens]	2378	77030	150	98	77	60	70.9	890	1	0	0	543.931	1628.77	3	1628.77	-0.0005	0	50.69	5.5e-05	R	KPVEEYANCHLAR	A
4	gi|62897069	transferrin variant [Homo sapiens]	2378	77030	150	98	77	60	70.9	891	1	0	0	543.932	1628.77	3	1628.77	-0.0002	0	58.59	1.9e-05	R	KPVEEYANCHLAR	A
4	gi|62897069	transferrin variant [Homo sapiens]	2378	77030	150	98	77	60	70.9	892	1	0	0	815.411	1628.81	2	1628.81	-0.0004	0	53.5	5.5e-05	K	EDPQTFYYAVAVVK	K
4	gi|62897069	transferrin variant [Homo sapiens]	2378	77030	150	98	77	60	70.9	918	1	0	0	824.919	1647.82	2	1647.82	0.002	2	10.62	0.54	K	SASDLTWDNLKGKK	S
4	gi|62897069	transferrin variant [Homo sapiens]	2378	77030	150	98	77	60	70.9	921	1	0	0	827.433	1652.85	2	1652.85	0.0003	1	43.77	0.1	K	YLGEEYVKAVGNLR	K
4	gi|62897069	transferrin variant [Homo sapiens]	2378	77030	150	98	77	60	70.9	928	1	0	0	829.915	1657.82	2	1657.82	-0.002	1	63.28	8.7e-05	K	HSTIFENLANKADR	D
4	gi|62897069	transferrin variant [Homo sapiens]	2378	77030	150	98	77	60	70.9	948	1	0	0	836.898	1671.78	2	1671.78	0.0021	0	52.91	9.8e-05	R	KPVEEYANCHLAR	A
4	gi|62897069	transferrin variant [Homo sapiens]	2378	77030	150	98	77	60	70.9	949	1	0	0	836.913	1671.81	2	1671.81	-0.004	0	30.47	0.0014	K	EDPQTFYYAVAVVK	K
4	gi|62897069	transferrin variant [Homo sapiens]	2378	77030	150	98	77	60	70.9	963	1	0	0	839.904	1677.79	2	1677.79	0.0047	1	40.27	0.026	R	NTYEKYLGEEYVK	A
4	gi|62897069	transferrin variant [Homo sapiens]	2378	77030	150	98	77	60	70.9	971	1	0	0	563.955	1688.84	3	1688.84	0	0	47.31	0.00016	K	DCHLAQVPSHTVVAR	S
4	gi|62897069	transferrin variant [Homo sapiens]	2378	77030	150	98	77	60	70.9	983	1	0	0	848.935	1695.86	2	1695.86	-0.003	1	37.58	0.00069	K	YLGEEYVKAVGNLR	K
4	gi|62897069	transferrin variant [Homo sapiens]	2378	77030	150	98	77	60	70.9	988	2	0	0	851.418	1700.82	2	1700.82	-0.001	1	6.38	0.72	K	HSTIFENLANKADR	D
4	gi|62897069	transferrin variant [Homo sapiens]	2378	77030	150	98	77	60	70.9	989	1	0	0	851.899	1701.78	2	1701.78	0.0014	1	82.13	4.4e-08	R	KCSTSSLLEACTFR	R
4	gi|62897069	transferrin variant [Homo sapiens]	2378	77030	150	98	77	60	70.9	990	1	0	0	851.899	1701.78	2	1701.78	0.003	1	29.95	0.0016	R	KCSTSSLLEACTFR	R
4	gi|62897069	transferrin variant [Homo sapiens]	2378	77030	150	98	77	60	70.9	998	1	0	1	853.888	1705.76	2	1705.76	0.0027	0	74.01	1.4e-06	K	LCMGSGLNLCEPNNK	E
4	gi|62897069	transferrin variant [Homo sapiens]	2378	77030	150	98	77	60	70.9	1027	1	0	0	863.389	1724.76	2	1724.76	0.003	0	70.91	5.3e-06	K	IECVSAETTEDCIAK	I
4	gi|62897069	transferrin variant [Homo sapiens]	2378	77030	150	98	77	60	70.9	1052	1	0	0	874.885	1747.75	2	1747.75	0.0033	1	33.97	0.0031	R	FDEFFSEGCAPGSKK	D
4	gi|62897069	transferrin variant [Homo sapiens]	2378	77030	150	98	77	60	70.9	1053	1	0	1	875.389	1748.76	2	1748.76	0.0001	0	27.9	0.0024	K	LCMGSGLNLCEPNNK	E
4	gi|62897069	transferrin variant [Homo sapiens]	2378	77030	150	98	77	60	70.9	1075	1	0	0	884.892	1767.77	2	1767.77	0.0039	0	26.38	0.0034	K	IECVSAETTEDCIAK	I
4	gi|62897069	transferrin variant [Homo sapiens]	2378	77030	150	98	77	60	70.9	1119	1	0	0	900.961	1799.91	2	1799.91	-0.0023	1	9.37	0.61	K	EDPQTFYYAVAVVKK	D
4	gi|62897069	transferrin variant [Homo sapiens]	2378	77030	150	98	77	60	70.9	1208	1	0	0	930.91	1859.8	2	1859.8	0.0017	0	40.62	0.0003	R	EGTCPEAPTDECKPVK	W
4	gi|62897069	transferrin variant [Homo sapiens]	2378	77030	150	98	77	60	70.9	1212	1	0	0	932.453	1862.89	2	1862.89	0.0005	2	41.77	0.00012	K	DKSKEFQLFSSPHGK	D
4	gi|62897069	transferrin variant [Homo sapiens]	2378	77030	150	98	77	60	70.9	1244	1	0	0	941.441	1880.87	2	1880.87	-0.001	1	64.6	5.8e-06	K	ADRDQYELLCLDNTR	K
4	gi|62897069	transferrin variant [Homo sapiens]	2378	77030	150	98	77	60	70.9	1301	1	0	0	642.302	1923.88	3	1923.87	0.01	1	18.84	0.085	K	ADRDQYELLCLDNTR	K
4	gi|62897069	transferrin variant [Homo sapiens]	2378	77030	150	98	77	60	70.9	1302	1	0	0	962.952	1923.89	2	1923.87	0.015	1	27.09	0.011	K	ADRDQYELLCLDNTR	K
4	gi|62897069	transferrin variant [Homo sapiens]	2378	77030	150	98	77	60	70.9	1312	1	0	0	646.004	1934.99	3	1934.99	0.0017	1	16.29	0.18	K	EFQLFSSPHGKDLLFK	D
4	gi|62897069	transferrin variant [Homo sapiens]	2378	77030	150	98	77	60	70.9	1313	1	0	0	968.503	1934.99	2	1934.99	0.0028	1	21.99	0.01	K	EFQLFSSPHGKDLLFK	D
4	gi|62897069	transferrin variant [Homo sapiens]	2378	77030	150	98	77	60	70.9	1339	1	0	0	976.974	1951.93	2	1951.93	0.0017	1	79.09	3e-05	K	NLNEKDYELLCLDGTR	K
4	gi|62897069	transferrin variant [Homo sapiens]	2378	77030	150	98	77	60	70.9	1340	1	0	0	651.652	1951.93	3	1951.93	0.0039	1	37.06	0.018	K	NLNEKDYELLCLDGTR	K
4	gi|62897069	transferrin variant [Homo sapiens]	2378	77030	150	98	77	60	70.9	1354	1	0	0	985.001	1967.99	2	1967.98	0.0059	1	44.68	0.00015	K	GDVAFVKHQTVPQNTGGK	N
4	gi|62897069	transferrin variant [Homo sapiens]	2378	77030	150	98	77	60	70.9	1361	1	0	0	990.007	1978	2	1977.99	0.0044	1	14.54	0.058	K	EFQLFSSPHGKDLLFK	D
4	gi|62897069	transferrin variant [Homo sapiens]	2378	77030	150	98	77	60	70.9	1378	1	0	0	998.479	1994.94	2	1994.94	0.0069	1	66.07	0.00069	K	NLNEKDYELLCLDGTR	K
4	gi|62897069	transferrin variant [Homo sapiens]	2378	77030	150	98	77	60	70.9	1386	1	0	1	1006.98	2011.94	2	2011.95	-0.0005	1	52.34	1.3e-05	R	DHMKSVIPSDGPSVACVK	K
4	gi|62897069	transferrin variant [Homo sapiens]	2378	77030	150	98	77	60	70.9	1401	1	0	0	680.302	2037.88	3	2037.88	0.0059	1	77.23	1.4e-07	R	WCAVSEHEATKCQSFR	D
4	gi|62897069	transferrin variant [Homo sapiens]	2378	77030	150	98	77	60	70.9	1432	1	0	0	690.683	2069.03	3	2069.02	0.0045	0	29.92	0.0016	K	EDLIWELLNQAQEHFGK	D
4	gi|62897069	transferrin variant [Homo sapiens]	2378	77030	150	98	77	60	70.9	1433	1	0	0	1035.52	2069.03	2	2069.02	0.0047	0	46.26	0.00075	K	EDLIWELLNQAQEHFGK	D
4	gi|62897069	transferrin variant [Homo sapiens]	2378	77030	150	98	77	60	70.9	1438	1	0	0	1036.47	2070.92	2	2070.92	0.0008	0	41.21	0.00047	K	SDNCEDTPEAGYFAVAVVK	K
4	gi|62897069	transferrin variant [Homo sapiens]	2378	77030	150	98	77	60	70.9	1450	1	0	0	1041.45	2080.88	2	2080.88	-0.0025	1	8.68	0.25	R	WCAVSEHEATKCQSFR	D
4	gi|62897069	transferrin variant [Homo sapiens]	2378	77030	150	98	77	60	70.9	1475	1	0	0	1049.02	2096.02	2	2096.02	0.001	2	7.9	0.37	R	SETKDLLFRDDTVCLAK	L
4	gi|62897069	transferrin variant [Homo sapiens]	2378	77030	150	98	77	60	70.9	1537	1	0	1	1080.02	2158.02	2	2158.01	0.0112	0	29.56	0.0021	K	IMNGEADAMSLDGGFVYIAGK	C
4	gi|62897069	transferrin variant [Homo sapiens]	2378	77030	150	98	77	60	70.9	1549	1	0	0	724.372	2170.09	3	2170.09	0.0064	0	71.3	4.4e-06	R	SAGWNIPIGLLYCDLPEPR	K
4	gi|62897069	transferrin variant [Homo sapiens]	2378	77030	150	98	77	60	70.9	1550	1	0	0	1086.06	2170.1	2	2170.09	0.009	0	60.29	1.8e-05	R	SAGWNIPIGLLYCDLPEPR	K
4	gi|62897069	transferrin variant [Homo sapiens]	2378	77030	150	98	77	60	70.9	1556	1	0	0	725.032	2172.08	3	2172.07	0.0005	2	44.23	0.00032	K	DLLFRDDTVCLAKLHDR	N
4	gi|62897069	transferrin variant [Homo sapiens]	2378	77030	150	98	77	60	70.9	1567	1	0	0	732.049	2193.13	3	2193.12	0.0039	2	4.39	0.55	K	SKEFQLFSSPHGKDLLFK	D
4	gi|62897069	transferrin variant [Homo sapiens]	2378	77030	150	98	77	60	70.9	1571	1	0	1	1101.52	2201.02	2	2201.01	0.0042	0	13.49	0.066	K	IMNGEADAMSLDGGFVYIAGK	C
4	gi|62897069	transferrin variant [Homo sapiens]	2378	77030	150	98	77	60	70.9	1586	1	0	0	1107.56	2213.1	2	2213.09	0.0033	0	45.38	0.00015	R	SAGWNIPIGLLYCDLPEPR	K
4	gi|62897069	transferrin variant [Homo sapiens]	2378	77030	150	98	77	60	70.9	1643	1	0	0	759.382	2275.12	3	2275.12	0	1	42.59	0.13	K	DGAGDVAFVKHSTIFENLANK	A
4	gi|62897069	transferrin variant [Homo sapiens]	2378	77030	150	98	77	60	70.9	1644	1	0	0	1138.57	2275.13	2	2275.12	0.0041	1	45.29	0.0072	K	DGAGDVAFVKHSTIFENLANK	A
4	gi|62897069	transferrin variant [Homo sapiens]	2378	77030	150	98	77	60	70.9	1662	1	0	1	767.719	2300.13	3	2300.13	0.0039	1	44.05	0.00035	R	TAGWNIPMGLLYNKINHCR	F
4	gi|62897069	transferrin variant [Homo sapiens]	2378	77030	150	98	77	60	70.9	1663	1	0	1	1151.07	2300.13	2	2300.13	0.004	1	44.79	0.00056	R	TAGWNIPMGLLYNKINHCR	F
4	gi|62897069	transferrin variant [Homo sapiens]	2378	77030	150	98	77	60	70.9	1686	1	0	0	773.718	2318.13	3	2318.13	0.0043	1	24.86	0.028	K	DGAGDVAFVKHSTIFENLANK	A
4	gi|62897069	transferrin variant [Homo sapiens]	2378	77030	150	98	77	60	70.9	1687	1	0	0	1160.07	2318.13	2	2318.13	0.0053	1	34.57	0.00089	K	DGAGDVAFVKHSTIFENLANK	A
4	gi|62897069	transferrin variant [Homo sapiens]	2378	77030	150	98	77	60	70.9	1693	1	0	0	778.056	2331.15	3	2331.15	-0.0042	2	16	0.27	R	NTYEKYLGEEYVKAVGNLR	K
4	gi|62897069	transferrin variant [Homo sapiens]	2378	77030	150	98	77	60	70.9	1694	1	0	0	1166.58	2331.15	2	2331.15	-0.0006	2	56.18	0.00025	R	NTYEKYLGEEYVKAVGNLR	K
4	gi|62897069	transferrin variant [Homo sapiens]	2378	77030	150	98	77	60	70.9	1701	1	0	1	782.054	2343.14	3	2343.14	0.0037	1	14.7	0.057	R	TAGWNIPMGLLYNKINHCR	F
4	gi|62897069	transferrin variant [Homo sapiens]	2378	77030	150	98	77	60	70.9	1702	1	0	1	1172.58	2343.14	2	2343.14	0.005	1	7.96	0.18	R	TAGWNIPMGLLYNKINHCR	F
4	gi|62897069	transferrin variant [Homo sapiens]	2378	77030	150	98	77	60	70.9	1710	1	0	0	786.055	2355.14	3	2355.15	-0.0066	1	9.07	0.18	K	EDLIWELLNQAQEHFGKDK	S
4	gi|62897069	transferrin variant [Homo sapiens]	2378	77030	150	98	77	60	70.9	1711	1	0	0	1178.58	2355.15	2	2355.15	0.0022	1	23.19	0.0088	K	EDLIWELLNQAQEHFGKDK	S
4	gi|62897069	transferrin variant [Homo sapiens]	2378	77030	150	98	77	60	70.9	1739	1	0	0	800.393	2398.16	3	2398.16	0.0016	1	2.23	0.9	K	EDLIWELLNQAQEHFGKDK	S
4	gi|62897069	transferrin variant [Homo sapiens]	2378	77030	150	98	77	60	70.9	1740	1	0	0	1200.09	2398.16	2	2398.16	0.0019	1	4.19	0.57	K	EDLIWELLNQAQEHFGKDK	S
4	gi|62897069	transferrin variant [Homo sapiens]	2378	77030	150	98	77	60	70.9	1825	1	0	1	844.085	2529.23	3	2529.23	0.0013	1	42.4	0.00073	R	SMGGKEDLIWELLNQAQEHFGK	D
4	gi|62897069	transferrin variant [Homo sapiens]	2378	77030	150	98	77	60	70.9	1847	1	0	1	637.315	2545.23	4	2545.23	0.0034	1	1.27	0.76	R	SMGGKEDLIWELLNQAQEHFGK	D
4	gi|62897069	transferrin variant [Homo sapiens]	2378	77030	150	98	77	60	70.9	1852	1	0	0	638.08	2548.29	4	2548.29	0.0033	1	60.71	2.5e-06	R	KPVDEYKDCHLAQVPSHTVVAR	S
4	gi|62897069	transferrin variant [Homo sapiens]	2378	77030	150	98	77	60	70.9	1869	1	0	1	858.419	2572.23	3	2572.24	-0.0037	1	5.46	0.49	R	SMGGKEDLIWELLNQAQEHFGK	D
4	gi|62897069	transferrin variant [Homo sapiens]	2378	77030	150	98	77	60	70.9	1870	1	0	1	1287.13	2572.24	2	2572.24	-0.0003	1	25.58	0.004	R	SMGGKEDLIWELLNQAQEHFGK	D
4	gi|62897069	transferrin variant [Homo sapiens]	2378	77030	150	98	77	60	70.9	1871	1	0	1	858.421	2572.24	3	2572.24	0.0029	1	41.22	0.00027	R	SMGGKEDLIWELLNQAQEHFGK	D
4	gi|62897069	transferrin variant [Homo sapiens]	2378	77030	150	98	77	60	70.9	1872	1	0	1	1287.13	2572.24	2	2572.24	0.0053	1	33.27	0.0019	R	SMGGKEDLIWELLNQAQEHFGK	D
4	gi|62897069	transferrin variant [Homo sapiens]	2378	77030	150	98	77	60	70.9	1873	3	0	1	858.422	2572.24	3	2572.24	0.0062	1	1.62	1	R	SMGGKEDLIWELLNQAQEHFGK	D
4	gi|62897069	transferrin variant [Homo sapiens]	2378	77030	150	98	77	60	70.9	1893	1	0	1	863.752	2588.23	3	2588.23	0.0016	1	19.08	0.016	R	SMGGKEDLIWELLNQAQEHFGK	D
4	gi|62897069	transferrin variant [Homo sapiens]	2378	77030	150	98	77	60	70.9	1897	1	0	0	648.832	2591.3	4	2591.29	0.007	1	48.51	3.2e-05	R	KPVDEYKDCHLAQVPSHTVVAR	S
4	gi|62897069	transferrin variant [Homo sapiens]	2378	77030	150	98	77	60	70.9	1901	1	0	0	866.775	2597.3	3	2597.3	0.0026	2	22.78	0.36	R	CLVEKGDVAFVKHQTVPQNTGGK	N
4	gi|62897069	transferrin variant [Homo sapiens]	2378	77030	150	98	77	60	70.9	1912	1	0	0	1304.65	2607.28	2	2607.28	-0.0009	2	40.71	0.06	K	SVIPSDGPSVACVKKASYLDCIR	A
4	gi|62897069	transferrin variant [Homo sapiens]	2378	77030	150	98	77	60	70.9	1913	1	0	0	870.101	2607.28	3	2607.28	0.0033	2	27.23	0.26	K	SVIPSDGPSVACVKKASYLDCIR	A
4	gi|62897069	transferrin variant [Homo sapiens]	2378	77030	150	98	77	60	70.9	1917	1	0	1	872.753	2615.24	3	2615.24	-0.0054	1	1.61	0.74	R	SMGGKEDLIWELLNQAQEHFGK	D
4	gi|62897069	transferrin variant [Homo sapiens]	2378	77030	150	98	77	60	70.9	1934	1	0	0	879.107	2634.3	3	2634.3	0.0019	1	50.4	0.021	R	KPVDEYKDCHLAQVPSHTVVAR	S
4	gi|62897069	transferrin variant [Homo sapiens]	2378	77030	150	98	77	60	70.9	1935	1	0	0	659.582	2634.3	4	2634.3	0.0032	1	20.34	0.76	R	KPVDEYKDCHLAQVPSHTVVAR	S
4	gi|62897069	transferrin variant [Homo sapiens]	2378	77030	150	98	77	60	70.9	1949	1	0	0	886.436	2656.29	3	2656.29	-0.0013	2	4.69	0.52	K	EDLIWELLNQAQEHFGKDKSK	E
4	gi|62897069	transferrin variant [Homo sapiens]	2378	77030	150	98	77	60	70.9	1964	1	0	0	893.443	2677.31	3	2677.3	0.0056	1	59.46	2.7e-06	R	KPVDEYKDCHLAQVPSHTVVAR	S
4	gi|62897069	transferrin variant [Homo sapiens]	2378	77030	150	98	77	60	70.9	1994	1	0	0	907.453	2719.34	3	2719.34	-0.0016	2	30.28	0.51	K	CLKDGAGDVAFVKHSTIFENLANK	A
4	gi|62897069	transferrin variant [Homo sapiens]	2378	77030	150	98	77	60	70.9	2034	1	0	0	935.448	2803.32	3	2803.32	-0.0004	2	88.49	9e-09	K	NPDPWAKNLNEKDYELLCLDGTR	K
4	gi|62897069	transferrin variant [Homo sapiens]	2378	77030	150	98	77	60	70.9	2037	1	0	1	939.454	2815.34	3	2815.36	-0.0209	2	12.81	0.063	R	SMGGKEDLIWELLNQAQEHFGKDK	S
4	gi|62897069	transferrin variant [Homo sapiens]	2378	77030	150	98	77	60	70.9	2038	1	0	1	939.461	2815.36	3	2815.36	0.0019	2	20.71	0.011	R	SMGGKEDLIWELLNQAQEHFGKDK	S
4	gi|62897069	transferrin variant [Homo sapiens]	2378	77030	150	98	77	60	70.9	2039	1	0	1	704.848	2815.36	4	2815.36	0.0042	2	6.84	0.85	R	SMGGKEDLIWELLNQAQEHFGKDK	S
4	gi|62897069	transferrin variant [Homo sapiens]	2378	77030	150	98	77	60	70.9	2041	1	0	1	704.85	2815.37	4	2815.36	0.011	2	10.84	0.096	R	SMGGKEDLIWELLNQAQEHFGKDK	S
4	gi|62897069	transferrin variant [Homo sapiens]	2378	77030	150	98	77	60	70.9	2051	1	0	0	709.363	2833.42	4	2833.42	0.0025	2	21.77	0.12	K	EFQLFSSPHGKDLLFKDSAHGFLK	V
4	gi|62897069	transferrin variant [Homo sapiens]	2378	77030	150	98	77	60	70.9	2052	1	0	0	945.481	2833.42	3	2833.42	0.0036	2	25.81	0.018	K	EFQLFSSPHGKDLLFKDSAHGFLK	V
4	gi|62897069	transferrin variant [Homo sapiens]	2378	77030	150	98	77	60	70.9	2072	1	0	1	953.797	2858.37	3	2858.37	0.0032	2	33.11	0.00079	R	SMGGKEDLIWELLNQAQEHFGKDK	S
4	gi|62897069	transferrin variant [Homo sapiens]	2378	77030	150	98	77	60	70.9	2073	1	0	1	953.797	2858.37	3	2858.37	0.0041	2	26.38	0.017	R	SMGGKEDLIWELLNQAQEHFGKDK	S
4	gi|62897069	transferrin variant [Homo sapiens]	2378	77030	150	98	77	60	70.9	2083	1	0	0	959.816	2876.43	3	2876.42	0.0028	2	12.23	0.081	K	EFQLFSSPHGKDLLFKDSAHGFLK	V
4	gi|62897069	transferrin variant [Homo sapiens]	2378	77030	150	98	77	60	70.9	2143	1	0	0	760.09	3036.33	4	3036.33	0.002	1	31.9	0.62	R	EGTCPEAPTDECKPVKWCALSHHER	L
4	gi|62897069	transferrin variant [Homo sapiens]	2378	77030	150	98	77	60	70.9	2161	1	0	0	770.842	3079.34	4	3079.33	0.0046	1	27.74	0.38	R	EGTCPEAPTDECKPVKWCALSHHER	L
4	gi|62897069	transferrin variant [Homo sapiens]	2378	77030	150	98	77	60	70.9	2187	1	0	0	795.636	3178.51	4	3178.51	0.0032	2	30.69	0.0016	K	HSTIFENLANKADRDQYELLCLDNTR	K
4	gi|62897069	transferrin variant [Homo sapiens]	2378	77030	150	98	77	60	70.9	2188	1	0	0	1060.51	3178.52	3	3178.51	0.007	2	32.48	0.18	K	HSTIFENLANKADRDQYELLCLDNTR	K
4	gi|62897069	transferrin variant [Homo sapiens]	2378	77030	150	98	77	60	70.9	2205	1	0	0	806.387	3221.52	4	3221.52	0.0034	2	43.92	0.00022	K	HSTIFENLANKADRDQYELLCLDNTR	K
4	gi|62897069	transferrin variant [Homo sapiens]	2378	77030	150	98	77	60	70.9	2206	1	0	0	1074.85	3221.52	3	3221.52	0.0077	2	9.01	0.14	K	HSTIFENLANKADRDQYELLCLDNTR	K
4	gi|553788	transferrin, partial [Homo sapiens]	1583	53725	106	68	49	39	69.4	72	1	0	0	459.228	916.441	2	916.44	0.0008	0	10.26	0.43	K	DSAHGFLK	V
4	gi|553788	transferrin, partial [Homo sapiens]	1583	53725	106	68	49	39	69.4	111	2	0	0	489.748	977.481	2	977.482	-0.0006	0	17.82	1.1	K	DGAGDVAFVK	H
4	gi|553788	transferrin, partial [Homo sapiens]	1583	53725	106	68	49	39	69.4	299	1	0	1	598.281	1194.55	2	1194.55	0.0021	0	53.06	0.00021	K	DSGFQMNQLR	G
4	gi|553788	transferrin, partial [Homo sapiens]	1583	53725	106	68	49	39	69.4	364	1	0	0	413.52	1237.54	3	1237.54	-0.0026	0	24.82	0.021	K	WCALSHHER	L
4	gi|553788	transferrin, partial [Homo sapiens]	1583	53725	106	68	49	39	69.4	380	1	0	0	625.308	1248.6	2	1248.6	0.0032	0	49.02	0.0026	K	SASDLTWDNLK	G
4	gi|553788	transferrin, partial [Homo sapiens]	1583	53725	106	68	49	39	69.4	407	1	0	0	637.333	1272.65	2	1272.65	0.0058	0	66.22	2.2e-06	K	HSTIFENLANK	A
4	gi|553788	transferrin, partial [Homo sapiens]	1583	53725	106	68	49	39	69.4	418	1	0	0	638.821	1275.63	2	1275.62	0.0035	0	42.75	0.0011	K	EFQLFSSPHGK	D
4	gi|553788	transferrin, partial [Homo sapiens]	1583	53725	106	68	49	39	69.4	426	1	0	0	640.783	1279.55	2	1279.55	0.0013	0	29.83	0.013	K	CDEWSVNSVGK	I
4	gi|553788	transferrin, partial [Homo sapiens]	1583	53725	106	68	49	39	69.4	469	1	0	0	658.835	1315.65	2	1315.65	0.0024	0	50.87	5e-05	K	HSTIFENLANK	A
4	gi|553788	transferrin, partial [Homo sapiens]	1583	53725	106	68	49	39	69.4	472	1	0	0	660.324	1318.63	2	1318.63	0.0034	0	48.26	0.00068	K	EFQLFSSPHGK	D
4	gi|553788	transferrin, partial [Homo sapiens]	1583	53725	106	68	49	39	69.4	533	1	0	1	683.835	1365.66	2	1365.65	0.0095	1	60.88	2.3e-05	K	KDSGFQMNQLR	G
4	gi|553788	transferrin, partial [Homo sapiens]	1583	53725	106	68	49	39	69.4	570	1	0	0	704.37	1406.73	2	1406.72	0.0035	1	42.57	0.057	R	CLVEKGDVAFVK	H
4	gi|553788	transferrin, partial [Homo sapiens]	1583	53725	106	68	49	39	69.4	571	1	0	0	704.371	1406.73	2	1406.72	0.0045	1	7.52	0.53	R	CLVEKGDVAFVK	H
4	gi|553788	transferrin, partial [Homo sapiens]	1583	53725	106	68	49	39	69.4	575	1	0	0	705.371	1408.73	2	1408.72	0.0061	1	16.48	0.085	K	DSAHGFLKVPPR	M
4	gi|553788	transferrin, partial [Homo sapiens]	1583	53725	106	68	49	39	69.4	596	1	0	0	710.853	1419.69	2	1419.7	-0.0073	1	33.95	0.0053	K	KSASDLTWDNLK	G
4	gi|553788	transferrin, partial [Homo sapiens]	1583	53725	106	68	49	39	69.4	628	1	0	0	725.869	1449.72	2	1449.73	-0.0058	1	29.48	0.0072	R	CLVEKGDVAFVK	H
4	gi|553788	transferrin, partial [Homo sapiens]	1583	53725	106	68	49	39	69.4	647	1	0	0	733.364	1464.71	2	1464.7	0.0093	1	31.19	0.003	K	CLKDGAGDVAFVK	H
4	gi|553788	transferrin, partial [Homo sapiens]	1583	53725	106	68	49	39	69.4	662	1	0	0	739.368	1476.72	2	1476.72	0.001	1	41.53	0.2	K	SASDLTWDNLKGK	K
4	gi|553788	transferrin, partial [Homo sapiens]	1583	53725	106	68	49	39	69.4	665	1	0	1	739.872	1477.73	2	1477.73	0.0011	0	76.93	9.6e-08	K	MYLGYEYVTAIR	N
4	gi|553788	transferrin, partial [Homo sapiens]	1583	53725	106	68	49	39	69.4	666	1	0	1	739.872	1477.73	2	1477.73	0.0015	0	68.41	1e-06	K	MYLGYEYVTAIR	N
4	gi|553788	transferrin, partial [Homo sapiens]	1583	53725	106	68	49	39	69.4	680	1	0	0	497.925	1490.75	3	1490.75	-0.0001	1	2.08	0.64	K	SKEFQLFSSPHGK	D
4	gi|553788	transferrin, partial [Homo sapiens]	1583	53725	106	68	49	39	69.4	685	1	0	1	747.867	1493.72	2	1493.72	-0.0024	0	46.76	5.5e-05	K	MYLGYEYVTAIR	N
4	gi|553788	transferrin, partial [Homo sapiens]	1583	53725	106	68	49	39	69.4	726	1	0	0	761.372	1520.73	2	1520.73	0.0009	1	78.26	7.2e-07	R	LKCDEWSVNSVGK	I
4	gi|553788	transferrin, partial [Homo sapiens]	1583	53725	106	68	49	39	69.4	727	1	0	1	761.373	1520.73	2	1520.73	-0.0011	0	37.75	0.002	K	MYLGYEYVTAIR	N
4	gi|553788	transferrin, partial [Homo sapiens]	1583	53725	106	68	49	39	69.4	739	1	0	0	767.407	1532.8	2	1532.8	-0.0003	1	38.34	0.095	K	DLLFKDSAHGFLK	V
4	gi|553788	transferrin, partial [Homo sapiens]	1583	53725	106	68	49	39	69.4	742	1	0	0	767.887	1533.76	2	1533.76	0.0019	1	53.54	0.00072	K	SKEFQLFSSPHGK	D
4	gi|553788	transferrin, partial [Homo sapiens]	1583	53725	106	68	49	39	69.4	749	1	0	0	770.358	1538.7	2	1538.7	-0.0016	0	64.17	1.9e-05	R	DQYELLCLDNTR	K
4	gi|553788	transferrin, partial [Homo sapiens]	1583	53725	106	68	49	39	69.4	786	1	0	0	782.875	1563.74	2	1563.74	0.0005	1	78.15	4e-07	R	LKCDEWSVNSVGK	I
4	gi|553788	transferrin, partial [Homo sapiens]	1583	53725	106	68	49	39	69.4	805	1	0	0	788.908	1575.8	2	1575.8	-0.0037	1	25.08	0.045	K	DLLFKDSAHGFLK	V
4	gi|553788	transferrin, partial [Homo sapiens]	1583	53725	106	68	49	39	69.4	810	1	0	0	789.335	1576.65	2	1576.65	0.0044	0	102	1.2e-09	R	FDEFFSEGCAPGSK	K
4	gi|553788	transferrin, partial [Homo sapiens]	1583	53725	106	68	49	39	69.4	811	1	0	0	789.391	1576.77	2	1576.76	0.0043	1	53.38	0.00011	K	SKEFQLFSSPHGK	D
4	gi|553788	transferrin, partial [Homo sapiens]	1583	53725	106	68	49	39	69.4	813	1	0	1	789.411	1576.81	2	1576.81	0.0007	0	57.73	3.7e-05	R	TAGWNIPMGLLYNK	I
4	gi|553788	transferrin, partial [Homo sapiens]	1583	53725	106	68	49	39	69.4	851	1	0	0	804.378	1606.74	2	1606.74	-0.0003	1	43.29	0.00029	R	LKCDEWSVNSVGK	I
4	gi|553788	transferrin, partial [Homo sapiens]	1583	53725	106	68	49	39	69.4	874	1	0	0	810.835	1619.65	2	1619.66	-0.0016	0	39.42	0.00029	R	FDEFFSEGCAPGSK	K
4	gi|553788	transferrin, partial [Homo sapiens]	1583	53725	106	68	49	39	69.4	892	1	0	0	815.411	1628.81	2	1628.81	-0.0004	0	53.5	5.5e-05	K	EDPQTFYYAVAVVK	K
4	gi|553788	transferrin, partial [Homo sapiens]	1583	53725	106	68	49	39	69.4	918	1	0	0	824.919	1647.82	2	1647.82	0.002	2	10.62	0.54	K	SASDLTWDNLKGKK	S
4	gi|553788	transferrin, partial [Homo sapiens]	1583	53725	106	68	49	39	69.4	928	1	0	0	829.915	1657.82	2	1657.82	-0.002	1	63.28	8.7e-05	K	HSTIFENLANKADR	D
4	gi|553788	transferrin, partial [Homo sapiens]	1583	53725	106	68	49	39	69.4	949	1	0	0	836.913	1671.81	2	1671.81	-0.004	0	30.47	0.0014	K	EDPQTFYYAVAVVK	K
4	gi|553788	transferrin, partial [Homo sapiens]	1583	53725	106	68	49	39	69.4	971	1	0	0	563.955	1688.84	3	1688.84	0	0	47.31	0.00016	K	DCHLAQVPSHTVVAR	S
4	gi|553788	transferrin, partial [Homo sapiens]	1583	53725	106	68	49	39	69.4	988	2	0	0	851.418	1700.82	2	1700.82	-0.001	1	6.38	0.72	K	HSTIFENLANKADR	D
4	gi|553788	transferrin, partial [Homo sapiens]	1583	53725	106	68	49	39	69.4	998	1	0	1	853.888	1705.76	2	1705.76	0.0027	0	74.01	1.4e-06	K	LCMGSGLNLCEPNNK	E
4	gi|553788	transferrin, partial [Homo sapiens]	1583	53725	106	68	49	39	69.4	1027	1	0	0	863.389	1724.76	2	1724.76	0.003	0	70.91	5.3e-06	K	IECVSAETTEDCIAK	I
4	gi|553788	transferrin, partial [Homo sapiens]	1583	53725	106	68	49	39	69.4	1052	1	0	0	874.885	1747.75	2	1747.75	0.0033	1	33.97	0.0031	R	FDEFFSEGCAPGSKK	D
4	gi|553788	transferrin, partial [Homo sapiens]	1583	53725	106	68	49	39	69.4	1053	1	0	1	875.389	1748.76	2	1748.76	0.0001	0	27.9	0.0024	K	LCMGSGLNLCEPNNK	E
4	gi|553788	transferrin, partial [Homo sapiens]	1583	53725	106	68	49	39	69.4	1075	1	0	0	884.892	1767.77	2	1767.77	0.0039	0	26.38	0.0034	K	IECVSAETTEDCIAK	I
4	gi|553788	transferrin, partial [Homo sapiens]	1583	53725	106	68	49	39	69.4	1119	1	0	0	900.961	1799.91	2	1799.91	-0.0023	1	9.37	0.61	K	EDPQTFYYAVAVVKK	D
4	gi|553788	transferrin, partial [Homo sapiens]	1583	53725	106	68	49	39	69.4	1208	1	0	0	930.91	1859.8	2	1859.8	0.0017	0	40.62	0.0003	R	EGTCPEAPTDECKPVK	W
4	gi|553788	transferrin, partial [Homo sapiens]	1583	53725	106	68	49	39	69.4	1212	1	0	0	932.453	1862.89	2	1862.89	0.0005	2	41.77	0.00012	K	DKSKEFQLFSSPHGK	D
4	gi|553788	transferrin, partial [Homo sapiens]	1583	53725	106	68	49	39	69.4	1244	1	0	0	941.441	1880.87	2	1880.87	-0.001	1	64.6	5.8e-06	K	ADRDQYELLCLDNTR	K
4	gi|553788	transferrin, partial [Homo sapiens]	1583	53725	106	68	49	39	69.4	1301	1	0	0	642.302	1923.88	3	1923.87	0.01	1	18.84	0.085	K	ADRDQYELLCLDNTR	K
4	gi|553788	transferrin, partial [Homo sapiens]	1583	53725	106	68	49	39	69.4	1302	1	0	0	962.952	1923.89	2	1923.87	0.015	1	27.09	0.011	K	ADRDQYELLCLDNTR	K
4	gi|553788	transferrin, partial [Homo sapiens]	1583	53725	106	68	49	39	69.4	1312	1	0	0	646.004	1934.99	3	1934.99	0.0017	1	16.29	0.18	K	EFQLFSSPHGKDLLFK	D
4	gi|553788	transferrin, partial [Homo sapiens]	1583	53725	106	68	49	39	69.4	1313	1	0	0	968.503	1934.99	2	1934.99	0.0028	1	21.99	0.01	K	EFQLFSSPHGKDLLFK	D
4	gi|553788	transferrin, partial [Homo sapiens]	1583	53725	106	68	49	39	69.4	1361	1	0	0	990.007	1978	2	1977.99	0.0044	1	14.54	0.058	K	EFQLFSSPHGKDLLFK	D
4	gi|553788	transferrin, partial [Homo sapiens]	1583	53725	106	68	49	39	69.4	1432	1	0	0	690.683	2069.03	3	2069.02	0.0045	0	29.92	0.0016	K	EDLIWELLNQAQEHFGK	D
4	gi|553788	transferrin, partial [Homo sapiens]	1583	53725	106	68	49	39	69.4	1433	1	0	0	1035.52	2069.03	2	2069.02	0.0047	0	46.26	0.00075	K	EDLIWELLNQAQEHFGK	D
4	gi|553788	transferrin, partial [Homo sapiens]	1583	53725	106	68	49	39	69.4	1438	1	0	0	1036.47	2070.92	2	2070.92	0.0008	0	41.21	0.00047	K	SDNCEDTPEAGYFAVAVVK	K
4	gi|553788	transferrin, partial [Homo sapiens]	1583	53725	106	68	49	39	69.4	1537	1	0	1	1080.02	2158.02	2	2158.01	0.0112	0	29.56	0.0021	K	IMNGEADAMSLDGGFVYIAGK	C
4	gi|553788	transferrin, partial [Homo sapiens]	1583	53725	106	68	49	39	69.4	1549	1	0	0	724.372	2170.09	3	2170.09	0.0064	0	71.3	4.4e-06	R	SAGWNIPIGLLYCDLPEPR	K
4	gi|553788	transferrin, partial [Homo sapiens]	1583	53725	106	68	49	39	69.4	1550	1	0	0	1086.06	2170.1	2	2170.09	0.009	0	60.29	1.8e-05	R	SAGWNIPIGLLYCDLPEPR	K
4	gi|553788	transferrin, partial [Homo sapiens]	1583	53725	106	68	49	39	69.4	1567	1	0	0	732.049	2193.13	3	2193.12	0.0039	2	4.39	0.55	K	SKEFQLFSSPHGKDLLFK	D
4	gi|553788	transferrin, partial [Homo sapiens]	1583	53725	106	68	49	39	69.4	1571	1	0	1	1101.52	2201.02	2	2201.01	0.0042	0	13.49	0.066	K	IMNGEADAMSLDGGFVYIAGK	C
4	gi|553788	transferrin, partial [Homo sapiens]	1583	53725	106	68	49	39	69.4	1586	1	0	0	1107.56	2213.1	2	2213.09	0.0033	0	45.38	0.00015	R	SAGWNIPIGLLYCDLPEPR	K
4	gi|553788	transferrin, partial [Homo sapiens]	1583	53725	106	68	49	39	69.4	1643	1	0	0	759.382	2275.12	3	2275.12	0	1	42.59	0.13	K	DGAGDVAFVKHSTIFENLANK	A
4	gi|553788	transferrin, partial [Homo sapiens]	1583	53725	106	68	49	39	69.4	1644	1	0	0	1138.57	2275.13	2	2275.12	0.0041	1	45.29	0.0072	K	DGAGDVAFVKHSTIFENLANK	A
4	gi|553788	transferrin, partial [Homo sapiens]	1583	53725	106	68	49	39	69.4	1662	1	0	1	767.719	2300.13	3	2300.13	0.0039	1	44.05	0.00035	R	TAGWNIPMGLLYNKINHCR	F
4	gi|553788	transferrin, partial [Homo sapiens]	1583	53725	106	68	49	39	69.4	1663	1	0	1	1151.07	2300.13	2	2300.13	0.004	1	44.79	0.00056	R	TAGWNIPMGLLYNKINHCR	F
4	gi|553788	transferrin, partial [Homo sapiens]	1583	53725	106	68	49	39	69.4	1686	1	0	0	773.718	2318.13	3	2318.13	0.0043	1	24.86	0.028	K	DGAGDVAFVKHSTIFENLANK	A
4	gi|553788	transferrin, partial [Homo sapiens]	1583	53725	106	68	49	39	69.4	1687	1	0	0	1160.07	2318.13	2	2318.13	0.0053	1	34.57	0.00089	K	DGAGDVAFVKHSTIFENLANK	A
4	gi|553788	transferrin, partial [Homo sapiens]	1583	53725	106	68	49	39	69.4	1701	1	0	1	782.054	2343.14	3	2343.14	0.0037	1	14.7	0.057	R	TAGWNIPMGLLYNKINHCR	F
4	gi|553788	transferrin, partial [Homo sapiens]	1583	53725	106	68	49	39	69.4	1702	1	0	1	1172.58	2343.14	2	2343.14	0.005	1	7.96	0.18	R	TAGWNIPMGLLYNKINHCR	F
4	gi|553788	transferrin, partial [Homo sapiens]	1583	53725	106	68	49	39	69.4	1710	1	0	0	786.055	2355.14	3	2355.15	-0.0066	1	9.07	0.18	K	EDLIWELLNQAQEHFGKDK	S
4	gi|553788	transferrin, partial [Homo sapiens]	1583	53725	106	68	49	39	69.4	1711	1	0	0	1178.58	2355.15	2	2355.15	0.0022	1	23.19	0.0088	K	EDLIWELLNQAQEHFGKDK	S
4	gi|553788	transferrin, partial [Homo sapiens]	1583	53725	106	68	49	39	69.4	1739	1	0	0	800.393	2398.16	3	2398.16	0.0016	1	2.23	0.9	K	EDLIWELLNQAQEHFGKDK	S
4	gi|553788	transferrin, partial [Homo sapiens]	1583	53725	106	68	49	39	69.4	1740	1	0	0	1200.09	2398.16	2	2398.16	0.0019	1	4.19	0.57	K	EDLIWELLNQAQEHFGKDK	S
4	gi|553788	transferrin, partial [Homo sapiens]	1583	53725	106	68	49	39	69.4	1825	1	0	1	844.085	2529.23	3	2529.23	0.0013	1	42.4	0.00073	R	SMGGKEDLIWELLNQAQEHFGK	D
4	gi|553788	transferrin, partial [Homo sapiens]	1583	53725	106	68	49	39	69.4	1847	1	0	1	637.315	2545.23	4	2545.23	0.0034	1	1.27	0.76	R	SMGGKEDLIWELLNQAQEHFGK	D
4	gi|553788	transferrin, partial [Homo sapiens]	1583	53725	106	68	49	39	69.4	1852	1	0	0	638.08	2548.29	4	2548.29	0.0033	1	60.71	2.5e-06	R	KPVDEYKDCHLAQVPSHTVVAR	S
4	gi|553788	transferrin, partial [Homo sapiens]	1583	53725	106	68	49	39	69.4	1869	1	0	1	858.419	2572.23	3	2572.24	-0.0037	1	5.46	0.49	R	SMGGKEDLIWELLNQAQEHFGK	D
4	gi|553788	transferrin, partial [Homo sapiens]	1583	53725	106	68	49	39	69.4	1870	1	0	1	1287.13	2572.24	2	2572.24	-0.0003	1	25.58	0.004	R	SMGGKEDLIWELLNQAQEHFGK	D
4	gi|553788	transferrin, partial [Homo sapiens]	1583	53725	106	68	49	39	69.4	1871	1	0	1	858.421	2572.24	3	2572.24	0.0029	1	41.22	0.00027	R	SMGGKEDLIWELLNQAQEHFGK	D
4	gi|553788	transferrin, partial [Homo sapiens]	1583	53725	106	68	49	39	69.4	1872	1	0	1	1287.13	2572.24	2	2572.24	0.0053	1	33.27	0.0019	R	SMGGKEDLIWELLNQAQEHFGK	D
4	gi|553788	transferrin, partial [Homo sapiens]	1583	53725	106	68	49	39	69.4	1873	3	0	1	858.422	2572.24	3	2572.24	0.0062	1	1.62	1	R	SMGGKEDLIWELLNQAQEHFGK	D
4	gi|553788	transferrin, partial [Homo sapiens]	1583	53725	106	68	49	39	69.4	1893	1	0	1	863.752	2588.23	3	2588.23	0.0016	1	19.08	0.016	R	SMGGKEDLIWELLNQAQEHFGK	D
4	gi|553788	transferrin, partial [Homo sapiens]	1583	53725	106	68	49	39	69.4	1897	1	0	0	648.832	2591.3	4	2591.29	0.007	1	48.51	3.2e-05	R	KPVDEYKDCHLAQVPSHTVVAR	S
4	gi|553788	transferrin, partial [Homo sapiens]	1583	53725	106	68	49	39	69.4	1917	1	0	1	872.753	2615.24	3	2615.24	-0.0054	1	1.61	0.74	R	SMGGKEDLIWELLNQAQEHFGK	D
4	gi|553788	transferrin, partial [Homo sapiens]	1583	53725	106	68	49	39	69.4	1934	1	0	0	879.107	2634.3	3	2634.3	0.0019	1	50.4	0.021	R	KPVDEYKDCHLAQVPSHTVVAR	S
4	gi|553788	transferrin, partial [Homo sapiens]	1583	53725	106	68	49	39	69.4	1935	1	0	0	659.582	2634.3	4	2634.3	0.0032	1	20.34	0.76	R	KPVDEYKDCHLAQVPSHTVVAR	S
4	gi|553788	transferrin, partial [Homo sapiens]	1583	53725	106	68	49	39	69.4	1949	1	0	0	886.436	2656.29	3	2656.29	-0.0013	2	4.69	0.52	K	EDLIWELLNQAQEHFGKDKSK	E
4	gi|553788	transferrin, partial [Homo sapiens]	1583	53725	106	68	49	39	69.4	1964	1	0	0	893.443	2677.31	3	2677.3	0.0056	1	59.46	2.7e-06	R	KPVDEYKDCHLAQVPSHTVVAR	S
4	gi|553788	transferrin, partial [Homo sapiens]	1583	53725	106	68	49	39	69.4	1994	1	0	0	907.453	2719.34	3	2719.34	-0.0016	2	30.28	0.51	K	CLKDGAGDVAFVKHSTIFENLANK	A
4	gi|553788	transferrin, partial [Homo sapiens]	1583	53725	106	68	49	39	69.4	2037	1	0	1	939.454	2815.34	3	2815.36	-0.0209	2	12.81	0.063	R	SMGGKEDLIWELLNQAQEHFGKDK	S
4	gi|553788	transferrin, partial [Homo sapiens]	1583	53725	106	68	49	39	69.4	2038	1	0	1	939.461	2815.36	3	2815.36	0.0019	2	20.71	0.011	R	SMGGKEDLIWELLNQAQEHFGKDK	S
4	gi|553788	transferrin, partial [Homo sapiens]	1583	53725	106	68	49	39	69.4	2039	1	0	1	704.848	2815.36	4	2815.36	0.0042	2	6.84	0.85	R	SMGGKEDLIWELLNQAQEHFGKDK	S
4	gi|553788	transferrin, partial [Homo sapiens]	1583	53725	106	68	49	39	69.4	2041	1	0	1	704.85	2815.37	4	2815.36	0.011	2	10.84	0.096	R	SMGGKEDLIWELLNQAQEHFGKDK	S
4	gi|553788	transferrin, partial [Homo sapiens]	1583	53725	106	68	49	39	69.4	2051	1	0	0	709.363	2833.42	4	2833.42	0.0025	2	21.77	0.12	K	EFQLFSSPHGKDLLFKDSAHGFLK	V
4	gi|553788	transferrin, partial [Homo sapiens]	1583	53725	106	68	49	39	69.4	2052	1	0	0	945.481	2833.42	3	2833.42	0.0036	2	25.81	0.018	K	EFQLFSSPHGKDLLFKDSAHGFLK	V
4	gi|553788	transferrin, partial [Homo sapiens]	1583	53725	106	68	49	39	69.4	2072	1	0	1	953.797	2858.37	3	2858.37	0.0032	2	33.11	0.00079	R	SMGGKEDLIWELLNQAQEHFGKDK	S
4	gi|553788	transferrin, partial [Homo sapiens]	1583	53725	106	68	49	39	69.4	2073	1	0	1	953.797	2858.37	3	2858.37	0.0041	2	26.38	0.017	R	SMGGKEDLIWELLNQAQEHFGKDK	S
4	gi|553788	transferrin, partial [Homo sapiens]	1583	53725	106	68	49	39	69.4	2083	1	0	0	959.816	2876.43	3	2876.42	0.0028	2	12.23	0.081	K	EFQLFSSPHGKDLLFKDSAHGFLK	V
4	gi|553788	transferrin, partial [Homo sapiens]	1583	53725	106	68	49	39	69.4	2143	1	0	0	760.09	3036.33	4	3036.33	0.002	1	31.9	0.62	R	EGTCPEAPTDECKPVKWCALSHHER	L
4	gi|553788	transferrin, partial [Homo sapiens]	1583	53725	106	68	49	39	69.4	2161	1	0	0	770.842	3079.34	4	3079.33	0.0046	1	27.74	0.38	R	EGTCPEAPTDECKPVKWCALSHHER	L
4	gi|553788	transferrin, partial [Homo sapiens]	1583	53725	106	68	49	39	69.4	2187	1	0	0	795.636	3178.51	4	3178.51	0.0032	2	30.69	0.0016	K	HSTIFENLANKADRDQYELLCLDNTR	K
4	gi|553788	transferrin, partial [Homo sapiens]	1583	53725	106	68	49	39	69.4	2188	1	0	0	1060.51	3178.52	3	3178.51	0.007	2	32.48	0.18	K	HSTIFENLANKADRDQYELLCLDNTR	K
4	gi|553788	transferrin, partial [Homo sapiens]	1583	53725	106	68	49	39	69.4	2205	1	0	0	806.387	3221.52	4	3221.52	0.0034	2	43.92	0.00022	K	HSTIFENLANKADRDQYELLCLDNTR	K
4	gi|553788	transferrin, partial [Homo sapiens]	1583	53725	106	68	49	39	69.4	2206	1	0	0	1074.85	3221.52	3	3221.52	0.0077	2	9.01	0.14	K	HSTIFENLANKADRDQYELLCLDNTR	K
4	gi|119599572	transferrin, isoform CRA_c [Homo sapiens]	1501	47357	91	60	51	39	80.7	10	3	0	0	706.39	705.383	1	705.381	0.0022	0	19.57	1.2	K	DLLFR	D
4	gi|119599572	transferrin, isoform CRA_c [Homo sapiens]	1501	47357	91	60	51	39	80.7	72	1	0	0	459.228	916.441	2	916.44	0.0008	0	10.26	0.43	K	DSAHGFLK	V
4	gi|119599572	transferrin, isoform CRA_c [Homo sapiens]	1501	47357	91	60	51	39	80.7	126	5	0	0	500.753	999.492	2	999.491	0.0008	0	3.53	1.1	K	YLGEEYVK	A
4	gi|119599572	transferrin, isoform CRA_c [Homo sapiens]	1501	47357	91	60	51	39	80.7	256	1	0	0	576.308	1150.6	2	1150.6	0.0036	1	38.44	0.048	R	SETKDLLFR	D
4	gi|119599572	transferrin, isoform CRA_c [Homo sapiens]	1501	47357	91	60	51	39	80.7	321	1	0	0	606.319	1210.62	2	1210.62	-0.0008	1	25.67	0.17	K	EACVHKILR	Q
4	gi|119599572	transferrin, isoform CRA_c [Homo sapiens]	1501	47357	91	60	51	39	80.7	364	1	0	0	413.52	1237.54	3	1237.54	-0.0026	0	24.82	0.021	K	WCALSHHER	L
4	gi|119599572	transferrin, isoform CRA_c [Homo sapiens]	1501	47357	91	60	51	39	80.7	380	1	0	0	625.308	1248.6	2	1248.6	0.0032	0	49.02	0.0026	K	SASDLTWDNLK	G
4	gi|119599572	transferrin, isoform CRA_c [Homo sapiens]	1501	47357	91	60	51	39	80.7	418	1	0	0	638.821	1275.63	2	1275.62	0.0035	0	42.75	0.0011	K	EFQLFSSPHGK	D
4	gi|119599572	transferrin, isoform CRA_c [Homo sapiens]	1501	47357	91	60	51	39	80.7	426	1	0	0	640.783	1279.55	2	1279.55	0.0013	0	29.83	0.013	K	CDEWSVNSVGK	I
4	gi|119599572	transferrin, isoform CRA_c [Homo sapiens]	1501	47357	91	60	51	39	80.7	472	1	0	0	660.324	1318.63	2	1318.63	0.0034	0	48.26	0.00068	K	EFQLFSSPHGK	D
4	gi|119599572	transferrin, isoform CRA_c [Homo sapiens]	1501	47357	91	60	51	39	80.7	520	1	0	0	677.845	1353.67	2	1353.62	0.0512	0	32.53	0.0083	K	DYELLCLDGTR	K
4	gi|119599572	transferrin, isoform CRA_c [Homo sapiens]	1501	47357	91	60	51	39	80.7	570	1	0	0	704.37	1406.73	2	1406.72	0.0035	1	42.57	0.057	R	CLVEKGDVAFVK	H
4	gi|119599572	transferrin, isoform CRA_c [Homo sapiens]	1501	47357	91	60	51	39	80.7	571	1	0	0	704.371	1406.73	2	1406.72	0.0045	1	7.52	0.53	R	CLVEKGDVAFVK	H
4	gi|119599572	transferrin, isoform CRA_c [Homo sapiens]	1501	47357	91	60	51	39	80.7	575	1	0	0	705.371	1408.73	2	1408.72	0.0061	1	16.48	0.085	K	DSAHGFLKVPPR	M
4	gi|119599572	transferrin, isoform CRA_c [Homo sapiens]	1501	47357	91	60	51	39	80.7	583	1	0	0	471.253	1410.74	3	1410.74	-0.0018	2	18.54	0.057	K	DKEACVHKILR	Q
4	gi|119599572	transferrin, isoform CRA_c [Homo sapiens]	1501	47357	91	60	51	39	80.7	596	1	0	0	710.853	1419.69	2	1419.7	-0.0073	1	33.95	0.0053	K	KSASDLTWDNLK	G
4	gi|119599572	transferrin, isoform CRA_c [Homo sapiens]	1501	47357	91	60	51	39	80.7	628	1	0	0	725.869	1449.72	2	1449.73	-0.0058	1	29.48	0.0072	R	CLVEKGDVAFVK	H
4	gi|119599572	transferrin, isoform CRA_c [Homo sapiens]	1501	47357	91	60	51	39	80.7	632	1	0	0	727.881	1453.75	2	1453.75	0.0015	2	37.55	0.43	K	DKEACVHKILR	Q
4	gi|119599572	transferrin, isoform CRA_c [Homo sapiens]	1501	47357	91	60	51	39	80.7	662	1	0	0	739.368	1476.72	2	1476.72	0.001	1	41.53	0.2	K	SASDLTWDNLKGK	K
4	gi|119599572	transferrin, isoform CRA_c [Homo sapiens]	1501	47357	91	60	51	39	80.7	665	1	0	1	739.872	1477.73	2	1477.73	0.0011	0	76.93	9.6e-08	K	MYLGYEYVTAIR	N
4	gi|119599572	transferrin, isoform CRA_c [Homo sapiens]	1501	47357	91	60	51	39	80.7	666	1	0	1	739.872	1477.73	2	1477.73	0.0015	0	68.41	1e-06	K	MYLGYEYVTAIR	N
4	gi|119599572	transferrin, isoform CRA_c [Homo sapiens]	1501	47357	91	60	51	39	80.7	672	1	0	0	743.361	1484.71	2	1484.7	0.0039	1	51.57	0.018	R	DDTVCLAKLHDR	N
4	gi|119599572	transferrin, isoform CRA_c [Homo sapiens]	1501	47357	91	60	51	39	80.7	680	1	0	0	497.925	1490.75	3	1490.75	-0.0001	1	2.08	0.64	K	SKEFQLFSSPHGK	D
4	gi|119599572	transferrin, isoform CRA_c [Homo sapiens]	1501	47357	91	60	51	39	80.7	685	1	0	1	747.867	1493.72	2	1493.72	-0.0024	0	46.76	5.5e-05	K	MYLGYEYVTAIR	N
4	gi|119599572	transferrin, isoform CRA_c [Homo sapiens]	1501	47357	91	60	51	39	80.7	691	1	0	0	749.384	1496.75	2	1496.75	0.0011	2	36.35	0.0025	K	DKEACVHKILR	Q
4	gi|119599572	transferrin, isoform CRA_c [Homo sapiens]	1501	47357	91	60	51	39	80.7	726	1	0	0	761.372	1520.73	2	1520.73	0.0009	1	78.26	7.2e-07	R	LKCDEWSVNSVGK	I
4	gi|119599572	transferrin, isoform CRA_c [Homo sapiens]	1501	47357	91	60	51	39	80.7	727	1	0	1	761.373	1520.73	2	1520.73	-0.0011	0	37.75	0.002	K	MYLGYEYVTAIR	N
4	gi|119599572	transferrin, isoform CRA_c [Homo sapiens]	1501	47357	91	60	51	39	80.7	733	1	0	0	764.863	1527.71	2	1527.71	0.0021	1	38.93	0.0012	R	DDTVCLAKLHDR	N
4	gi|119599572	transferrin, isoform CRA_c [Homo sapiens]	1501	47357	91	60	51	39	80.7	737	1	0	0	766.35	1530.69	2	1530.68	0.0048	0	79.28	1.4e-07	K	CSTSSLLEACTFR	R
4	gi|119599572	transferrin, isoform CRA_c [Homo sapiens]	1501	47357	91	60	51	39	80.7	739	1	0	0	767.407	1532.8	2	1532.8	-0.0003	1	38.34	0.095	K	DLLFKDSAHGFLK	V
4	gi|119599572	transferrin, isoform CRA_c [Homo sapiens]	1501	47357	91	60	51	39	80.7	742	1	0	0	767.887	1533.76	2	1533.76	0.0019	1	53.54	0.00072	K	SKEFQLFSSPHGK	D
4	gi|119599572	transferrin, isoform CRA_c [Homo sapiens]	1501	47357	91	60	51	39	80.7	786	1	0	0	782.875	1563.74	2	1563.74	0.0005	1	78.15	4e-07	R	LKCDEWSVNSVGK	I
4	gi|119599572	transferrin, isoform CRA_c [Homo sapiens]	1501	47357	91	60	51	39	80.7	789	1	0	0	783.403	1564.79	2	1564.79	-0.0011	1	41.01	0.0041	K	DLLFRDDTVCLAK	L
4	gi|119599572	transferrin, isoform CRA_c [Homo sapiens]	1501	47357	91	60	51	39	80.7	802	1	0	0	787.851	1573.69	2	1573.69	0.0018	0	66.83	5e-06	K	CSTSSLLEACTFR	R
4	gi|119599572	transferrin, isoform CRA_c [Homo sapiens]	1501	47357	91	60	51	39	80.7	805	1	0	0	788.908	1575.8	2	1575.8	-0.0037	1	25.08	0.045	K	DLLFKDSAHGFLK	V
4	gi|119599572	transferrin, isoform CRA_c [Homo sapiens]	1501	47357	91	60	51	39	80.7	810	1	0	0	789.335	1576.65	2	1576.65	0.0044	0	102	1.2e-09	R	FDEFFSEGCAPGSK	K
4	gi|119599572	transferrin, isoform CRA_c [Homo sapiens]	1501	47357	91	60	51	39	80.7	811	1	0	0	789.391	1576.77	2	1576.76	0.0043	1	53.38	0.00011	K	SKEFQLFSSPHGK	D
4	gi|119599572	transferrin, isoform CRA_c [Homo sapiens]	1501	47357	91	60	51	39	80.7	813	1	0	1	789.411	1576.81	2	1576.81	0.0007	0	57.73	3.7e-05	R	TAGWNIPMGLLYNK	I
4	gi|119599572	transferrin, isoform CRA_c [Homo sapiens]	1501	47357	91	60	51	39	80.7	819	1	0	0	529.596	1585.77	3	1585.77	-0.0012	0	76.27	3.1e-07	R	KPVEEYANCHLAR	A
4	gi|119599572	transferrin, isoform CRA_c [Homo sapiens]	1501	47357	91	60	51	39	80.7	851	1	0	0	804.378	1606.74	2	1606.74	-0.0003	1	43.29	0.00029	R	LKCDEWSVNSVGK	I
4	gi|119599572	transferrin, isoform CRA_c [Homo sapiens]	1501	47357	91	60	51	39	80.7	874	1	0	0	810.835	1619.65	2	1619.66	-0.0016	0	39.42	0.00029	R	FDEFFSEGCAPGSK	K
4	gi|119599572	transferrin, isoform CRA_c [Homo sapiens]	1501	47357	91	60	51	39	80.7	889	1	0	0	815.393	1628.77	2	1628.77	-0.0022	0	72.88	7.8e-07	R	KPVEEYANCHLAR	A
4	gi|119599572	transferrin, isoform CRA_c [Homo sapiens]	1501	47357	91	60	51	39	80.7	890	1	0	0	543.931	1628.77	3	1628.77	-0.0005	0	50.69	5.5e-05	R	KPVEEYANCHLAR	A
4	gi|119599572	transferrin, isoform CRA_c [Homo sapiens]	1501	47357	91	60	51	39	80.7	891	1	0	0	543.932	1628.77	3	1628.77	-0.0002	0	58.59	1.9e-05	R	KPVEEYANCHLAR	A
4	gi|119599572	transferrin, isoform CRA_c [Homo sapiens]	1501	47357	91	60	51	39	80.7	918	1	0	0	824.919	1647.82	2	1647.82	0.002	2	10.62	0.54	K	SASDLTWDNLKGKK	S
4	gi|119599572	transferrin, isoform CRA_c [Homo sapiens]	1501	47357	91	60	51	39	80.7	921	1	0	0	827.433	1652.85	2	1652.85	0.0003	1	43.77	0.1	K	YLGEEYVKAVGNLR	K
4	gi|119599572	transferrin, isoform CRA_c [Homo sapiens]	1501	47357	91	60	51	39	80.7	948	1	0	0	836.898	1671.78	2	1671.78	0.0021	0	52.91	9.8e-05	R	KPVEEYANCHLAR	A
4	gi|119599572	transferrin, isoform CRA_c [Homo sapiens]	1501	47357	91	60	51	39	80.7	963	1	0	0	839.904	1677.79	2	1677.79	0.0047	1	40.27	0.026	R	NTYEKYLGEEYVK	A
4	gi|119599572	transferrin, isoform CRA_c [Homo sapiens]	1501	47357	91	60	51	39	80.7	983	1	0	0	848.935	1695.86	2	1695.86	-0.003	1	37.58	0.00069	K	YLGEEYVKAVGNLR	K
4	gi|119599572	transferrin, isoform CRA_c [Homo sapiens]	1501	47357	91	60	51	39	80.7	989	1	0	0	851.899	1701.78	2	1701.78	0.0014	1	82.13	4.4e-08	R	KCSTSSLLEACTFR	R
4	gi|119599572	transferrin, isoform CRA_c [Homo sapiens]	1501	47357	91	60	51	39	80.7	990	1	0	0	851.899	1701.78	2	1701.78	0.003	1	29.95	0.0016	R	KCSTSSLLEACTFR	R
4	gi|119599572	transferrin, isoform CRA_c [Homo sapiens]	1501	47357	91	60	51	39	80.7	998	1	0	1	853.888	1705.76	2	1705.76	0.0027	0	74.01	1.4e-06	K	LCMGSGLNLCEPNNK	E
4	gi|119599572	transferrin, isoform CRA_c [Homo sapiens]	1501	47357	91	60	51	39	80.7	1027	1	0	0	863.389	1724.76	2	1724.76	0.003	0	70.91	5.3e-06	K	IECVSAETTEDCIAK	I
4	gi|119599572	transferrin, isoform CRA_c [Homo sapiens]	1501	47357	91	60	51	39	80.7	1052	1	0	0	874.885	1747.75	2	1747.75	0.0033	1	33.97	0.0031	R	FDEFFSEGCAPGSKK	D
4	gi|119599572	transferrin, isoform CRA_c [Homo sapiens]	1501	47357	91	60	51	39	80.7	1053	1	0	1	875.389	1748.76	2	1748.76	0.0001	0	27.9	0.0024	K	LCMGSGLNLCEPNNK	E
4	gi|119599572	transferrin, isoform CRA_c [Homo sapiens]	1501	47357	91	60	51	39	80.7	1075	1	0	0	884.892	1767.77	2	1767.77	0.0039	0	26.38	0.0034	K	IECVSAETTEDCIAK	I
4	gi|119599572	transferrin, isoform CRA_c [Homo sapiens]	1501	47357	91	60	51	39	80.7	1208	1	0	0	930.91	1859.8	2	1859.8	0.0017	0	40.62	0.0003	R	EGTCPEAPTDECKPVK	W
4	gi|119599572	transferrin, isoform CRA_c [Homo sapiens]	1501	47357	91	60	51	39	80.7	1212	1	0	0	932.453	1862.89	2	1862.89	0.0005	2	41.77	0.00012	K	DKSKEFQLFSSPHGK	D
4	gi|119599572	transferrin, isoform CRA_c [Homo sapiens]	1501	47357	91	60	51	39	80.7	1312	1	0	0	646.004	1934.99	3	1934.99	0.0017	1	16.29	0.18	K	EFQLFSSPHGKDLLFK	D
4	gi|119599572	transferrin, isoform CRA_c [Homo sapiens]	1501	47357	91	60	51	39	80.7	1313	1	0	0	968.503	1934.99	2	1934.99	0.0028	1	21.99	0.01	K	EFQLFSSPHGKDLLFK	D
4	gi|119599572	transferrin, isoform CRA_c [Homo sapiens]	1501	47357	91	60	51	39	80.7	1339	1	0	0	976.974	1951.93	2	1951.93	0.0017	1	79.09	3e-05	K	NLNEKDYELLCLDGTR	K
4	gi|119599572	transferrin, isoform CRA_c [Homo sapiens]	1501	47357	91	60	51	39	80.7	1340	1	0	0	651.652	1951.93	3	1951.93	0.0039	1	37.06	0.018	K	NLNEKDYELLCLDGTR	K
4	gi|119599572	transferrin, isoform CRA_c [Homo sapiens]	1501	47357	91	60	51	39	80.7	1354	1	0	0	985.001	1967.99	2	1967.98	0.0059	1	44.68	0.00015	K	GDVAFVKHQTVPQNTGGK	N
4	gi|119599572	transferrin, isoform CRA_c [Homo sapiens]	1501	47357	91	60	51	39	80.7	1361	1	0	0	990.007	1978	2	1977.99	0.0044	1	14.54	0.058	K	EFQLFSSPHGKDLLFK	D
4	gi|119599572	transferrin, isoform CRA_c [Homo sapiens]	1501	47357	91	60	51	39	80.7	1378	1	0	0	998.479	1994.94	2	1994.94	0.0069	1	66.07	0.00069	K	NLNEKDYELLCLDGTR	K
4	gi|119599572	transferrin, isoform CRA_c [Homo sapiens]	1501	47357	91	60	51	39	80.7	1432	1	0	0	690.683	2069.03	3	2069.02	0.0045	0	29.92	0.0016	K	EDLIWELLNQAQEHFGK	D
4	gi|119599572	transferrin, isoform CRA_c [Homo sapiens]	1501	47357	91	60	51	39	80.7	1433	1	0	0	1035.52	2069.03	2	2069.02	0.0047	0	46.26	0.00075	K	EDLIWELLNQAQEHFGK	D
4	gi|119599572	transferrin, isoform CRA_c [Homo sapiens]	1501	47357	91	60	51	39	80.7	1438	1	0	0	1036.47	2070.92	2	2070.92	0.0008	0	41.21	0.00047	K	SDNCEDTPEAGYFAVAVVK	K
4	gi|119599572	transferrin, isoform CRA_c [Homo sapiens]	1501	47357	91	60	51	39	80.7	1475	1	0	0	1049.02	2096.02	2	2096.02	0.001	2	7.9	0.37	R	SETKDLLFRDDTVCLAK	L
4	gi|119599572	transferrin, isoform CRA_c [Homo sapiens]	1501	47357	91	60	51	39	80.7	1537	1	0	1	1080.02	2158.02	2	2158.01	0.0112	0	29.56	0.0021	K	IMNGEADAMSLDGGFVYIAGK	C
4	gi|119599572	transferrin, isoform CRA_c [Homo sapiens]	1501	47357	91	60	51	39	80.7	1556	1	0	0	725.032	2172.08	3	2172.07	0.0005	2	44.23	0.00032	K	DLLFRDDTVCLAKLHDR	N
4	gi|119599572	transferrin, isoform CRA_c [Homo sapiens]	1501	47357	91	60	51	39	80.7	1567	1	0	0	732.049	2193.13	3	2193.12	0.0039	2	4.39	0.55	K	SKEFQLFSSPHGKDLLFK	D
4	gi|119599572	transferrin, isoform CRA_c [Homo sapiens]	1501	47357	91	60	51	39	80.7	1571	1	0	1	1101.52	2201.02	2	2201.01	0.0042	0	13.49	0.066	K	IMNGEADAMSLDGGFVYIAGK	C
4	gi|119599572	transferrin, isoform CRA_c [Homo sapiens]	1501	47357	91	60	51	39	80.7	1662	1	0	1	767.719	2300.13	3	2300.13	0.0039	1	44.05	0.00035	R	TAGWNIPMGLLYNKINHCR	F
4	gi|119599572	transferrin, isoform CRA_c [Homo sapiens]	1501	47357	91	60	51	39	80.7	1663	1	0	1	1151.07	2300.13	2	2300.13	0.004	1	44.79	0.00056	R	TAGWNIPMGLLYNKINHCR	F
4	gi|119599572	transferrin, isoform CRA_c [Homo sapiens]	1501	47357	91	60	51	39	80.7	1693	1	0	0	778.056	2331.15	3	2331.15	-0.0042	2	16	0.27	R	NTYEKYLGEEYVKAVGNLR	K
4	gi|119599572	transferrin, isoform CRA_c [Homo sapiens]	1501	47357	91	60	51	39	80.7	1694	1	0	0	1166.58	2331.15	2	2331.15	-0.0006	2	56.18	0.00025	R	NTYEKYLGEEYVKAVGNLR	K
4	gi|119599572	transferrin, isoform CRA_c [Homo sapiens]	1501	47357	91	60	51	39	80.7	1701	1	0	1	782.054	2343.14	3	2343.14	0.0037	1	14.7	0.057	R	TAGWNIPMGLLYNKINHCR	F
4	gi|119599572	transferrin, isoform CRA_c [Homo sapiens]	1501	47357	91	60	51	39	80.7	1702	1	0	1	1172.58	2343.14	2	2343.14	0.005	1	7.96	0.18	R	TAGWNIPMGLLYNKINHCR	F
4	gi|119599572	transferrin, isoform CRA_c [Homo sapiens]	1501	47357	91	60	51	39	80.7	1710	1	0	0	786.055	2355.14	3	2355.15	-0.0066	1	9.07	0.18	K	EDLIWELLNQAQEHFGKDK	S
4	gi|119599572	transferrin, isoform CRA_c [Homo sapiens]	1501	47357	91	60	51	39	80.7	1711	1	0	0	1178.58	2355.15	2	2355.15	0.0022	1	23.19	0.0088	K	EDLIWELLNQAQEHFGKDK	S
4	gi|119599572	transferrin, isoform CRA_c [Homo sapiens]	1501	47357	91	60	51	39	80.7	1739	1	0	0	800.393	2398.16	3	2398.16	0.0016	1	2.23	0.9	K	EDLIWELLNQAQEHFGKDK	S
4	gi|119599572	transferrin, isoform CRA_c [Homo sapiens]	1501	47357	91	60	51	39	80.7	1740	1	0	0	1200.09	2398.16	2	2398.16	0.0019	1	4.19	0.57	K	EDLIWELLNQAQEHFGKDK	S
4	gi|119599572	transferrin, isoform CRA_c [Homo sapiens]	1501	47357	91	60	51	39	80.7	1901	1	0	0	866.775	2597.3	3	2597.3	0.0026	2	22.78	0.36	R	CLVEKGDVAFVKHQTVPQNTGGK	N
4	gi|119599572	transferrin, isoform CRA_c [Homo sapiens]	1501	47357	91	60	51	39	80.7	1949	1	0	0	886.436	2656.29	3	2656.29	-0.0013	2	4.69	0.52	K	EDLIWELLNQAQEHFGKDKSK	E
4	gi|119599572	transferrin, isoform CRA_c [Homo sapiens]	1501	47357	91	60	51	39	80.7	2034	1	0	0	935.448	2803.32	3	2803.32	-0.0004	2	88.49	9e-09	K	NPDPWAKNLNEKDYELLCLDGTR	K
4	gi|119599572	transferrin, isoform CRA_c [Homo sapiens]	1501	47357	91	60	51	39	80.7	2051	1	0	0	709.363	2833.42	4	2833.42	0.0025	2	21.77	0.12	K	EFQLFSSPHGKDLLFKDSAHGFLK	V
4	gi|119599572	transferrin, isoform CRA_c [Homo sapiens]	1501	47357	91	60	51	39	80.7	2052	1	0	0	945.481	2833.42	3	2833.42	0.0036	2	25.81	0.018	K	EFQLFSSPHGKDLLFKDSAHGFLK	V
4	gi|119599572	transferrin, isoform CRA_c [Homo sapiens]	1501	47357	91	60	51	39	80.7	2083	1	0	0	959.816	2876.43	3	2876.42	0.0028	2	12.23	0.081	K	EFQLFSSPHGKDLLFKDSAHGFLK	V
4	gi|119599572	transferrin, isoform CRA_c [Homo sapiens]	1501	47357	91	60	51	39	80.7	2143	1	0	0	760.09	3036.33	4	3036.33	0.002	1	31.9	0.62	R	EGTCPEAPTDECKPVKWCALSHHER	L
4	gi|119599572	transferrin, isoform CRA_c [Homo sapiens]	1501	47357	91	60	51	39	80.7	2161	1	0	0	770.842	3079.34	4	3079.33	0.0046	1	27.74	0.38	R	EGTCPEAPTDECKPVKWCALSHHER	L
5	gi|29726565	Chain A, Human Serum Transferrin, N-Lobe	1344	36533	91	57	40	31	76.1	72	1	0	0	459.228	916.441	2	916.44	0.0008	0	10.26	0.43	K	DSAHGFLK	V
5	gi|29726565	Chain A, Human Serum Transferrin, N-Lobe	1344	36533	91	57	40	31	76.1	111	2	0	0	489.748	977.481	2	977.482	-0.0006	0	17.82	1.1	K	DGAGDVAFVK	H
5	gi|29726565	Chain A, Human Serum Transferrin, N-Lobe	1344	36533	91	57	40	31	76.1	123	1	0	0	499.243	996.47	2	996.47	0.0006	0	23.33	0.051	K	ASYLDCIR	A
5	gi|29726565	Chain A, Human Serum Transferrin, N-Lobe	1344	36533	91	57	40	31	76.1	223	1	0	0	563.291	1124.57	2	1124.56	0.002	1	31.63	0.062	K	KASYLDCIR	A
5	gi|29726565	Chain A, Human Serum Transferrin, N-Lobe	1344	36533	91	57	40	31	76.1	276	1	0	0	584.793	1167.57	2	1167.57	0.0014	1	46.3	0.0013	K	KASYLDCIR	A
5	gi|29726565	Chain A, Human Serum Transferrin, N-Lobe	1344	36533	91	57	40	31	76.1	299	1	0	1	598.281	1194.55	2	1194.55	0.0021	0	53.06	0.00021	K	DSGFQMNQLR	G
5	gi|29726565	Chain A, Human Serum Transferrin, N-Lobe	1344	36533	91	57	40	31	76.1	407	1	0	0	637.333	1272.65	2	1272.65	0.0058	0	66.22	2.2e-06	K	HSTIFENLANK	A
5	gi|29726565	Chain A, Human Serum Transferrin, N-Lobe	1344	36533	91	57	40	31	76.1	418	1	0	0	638.821	1275.63	2	1275.62	0.0035	0	42.75	0.0011	K	EFQLFSSPHGK	D
5	gi|29726565	Chain A, Human Serum Transferrin, N-Lobe	1344	36533	91	57	40	31	76.1	469	1	0	0	658.835	1315.65	2	1315.65	0.0024	0	50.87	5e-05	K	HSTIFENLANK	A
5	gi|29726565	Chain A, Human Serum Transferrin, N-Lobe	1344	36533	91	57	40	31	76.1	472	1	0	0	660.324	1318.63	2	1318.63	0.0034	0	48.26	0.00068	K	EFQLFSSPHGK	D
5	gi|29726565	Chain A, Human Serum Transferrin, N-Lobe	1344	36533	91	57	40	31	76.1	526	1	0	0	680.803	1359.59	2	1359.59	0.0033	0	38.11	0.0017	R	WCAVSEHEATK	C
5	gi|29726565	Chain A, Human Serum Transferrin, N-Lobe	1344	36533	91	57	40	31	76.1	533	1	0	1	683.835	1365.66	2	1365.65	0.0095	1	60.88	2.3e-05	K	KDSGFQMNQLR	G
5	gi|29726565	Chain A, Human Serum Transferrin, N-Lobe	1344	36533	91	57	40	31	76.1	575	1	0	0	705.371	1408.73	2	1408.72	0.0061	1	16.48	0.085	K	DSAHGFLKVPPR	M
5	gi|29726565	Chain A, Human Serum Transferrin, N-Lobe	1344	36533	91	57	40	31	76.1	588	1	0	0	708.365	1414.71	2	1414.71	0.002	0	76.46	6.1e-05	K	SVIPSDGPSVACVK	K
5	gi|29726565	Chain A, Human Serum Transferrin, N-Lobe	1344	36533	91	57	40	31	76.1	647	1	0	0	733.364	1464.71	2	1464.7	0.0093	1	31.19	0.003	K	CLKDGAGDVAFVK	H
5	gi|29726565	Chain A, Human Serum Transferrin, N-Lobe	1344	36533	91	57	40	31	76.1	665	1	0	1	739.872	1477.73	2	1477.73	0.0011	0	76.93	9.6e-08	K	MYLGYEYVTAIR	N
5	gi|29726565	Chain A, Human Serum Transferrin, N-Lobe	1344	36533	91	57	40	31	76.1	666	1	0	1	739.872	1477.73	2	1477.73	0.0015	0	68.41	1e-06	K	MYLGYEYVTAIR	N
5	gi|29726565	Chain A, Human Serum Transferrin, N-Lobe	1344	36533	91	57	40	31	76.1	680	1	0	0	497.925	1490.75	3	1490.75	-0.0001	1	2.08	0.64	K	SKEFQLFSSPHGK	D
5	gi|29726565	Chain A, Human Serum Transferrin, N-Lobe	1344	36533	91	57	40	31	76.1	685	1	0	1	747.867	1493.72	2	1493.72	-0.0024	0	46.76	5.5e-05	K	MYLGYEYVTAIR	N
5	gi|29726565	Chain A, Human Serum Transferrin, N-Lobe	1344	36533	91	57	40	31	76.1	727	1	0	1	761.373	1520.73	2	1520.73	-0.0011	0	37.75	0.002	K	MYLGYEYVTAIR	N
5	gi|29726565	Chain A, Human Serum Transferrin, N-Lobe	1344	36533	91	57	40	31	76.1	739	1	0	0	767.407	1532.8	2	1532.8	-0.0003	1	38.34	0.095	K	DLLFKDSAHGFLK	V
5	gi|29726565	Chain A, Human Serum Transferrin, N-Lobe	1344	36533	91	57	40	31	76.1	742	1	0	0	767.887	1533.76	2	1533.76	0.0019	1	53.54	0.00072	K	SKEFQLFSSPHGK	D
5	gi|29726565	Chain A, Human Serum Transferrin, N-Lobe	1344	36533	91	57	40	31	76.1	749	1	0	0	770.358	1538.7	2	1538.7	-0.0016	0	64.17	1.9e-05	R	DQYELLCLDNTR	K
5	gi|29726565	Chain A, Human Serum Transferrin, N-Lobe	1344	36533	91	57	40	31	76.1	805	1	0	0	788.908	1575.8	2	1575.8	-0.0037	1	25.08	0.045	K	DLLFKDSAHGFLK	V
5	gi|29726565	Chain A, Human Serum Transferrin, N-Lobe	1344	36533	91	57	40	31	76.1	811	1	0	0	789.391	1576.77	2	1576.76	0.0043	1	53.38	0.00011	K	SKEFQLFSSPHGK	D
5	gi|29726565	Chain A, Human Serum Transferrin, N-Lobe	1344	36533	91	57	40	31	76.1	820	1	0	0	793.915	1585.82	2	1585.81	0.0026	1	35.81	0.7	K	SVIPSDGPSVACVKK	A
5	gi|29726565	Chain A, Human Serum Transferrin, N-Lobe	1344	36533	91	57	40	31	76.1	892	1	0	0	815.411	1628.81	2	1628.81	-0.0004	0	53.5	5.5e-05	K	EDPQTFYYAVAVVK	K
5	gi|29726565	Chain A, Human Serum Transferrin, N-Lobe	1344	36533	91	57	40	31	76.1	928	1	0	0	829.915	1657.82	2	1657.82	-0.002	1	63.28	8.7e-05	K	HSTIFENLANKADR	D
5	gi|29726565	Chain A, Human Serum Transferrin, N-Lobe	1344	36533	91	57	40	31	76.1	949	1	0	0	836.913	1671.81	2	1671.81	-0.004	0	30.47	0.0014	K	EDPQTFYYAVAVVK	K
5	gi|29726565	Chain A, Human Serum Transferrin, N-Lobe	1344	36533	91	57	40	31	76.1	971	1	0	0	563.955	1688.84	3	1688.84	0	0	47.31	0.00016	K	DCHLAQVPSHTVVAR	S
5	gi|29726565	Chain A, Human Serum Transferrin, N-Lobe	1344	36533	91	57	40	31	76.1	988	2	0	0	851.418	1700.82	2	1700.82	-0.001	1	6.38	0.72	K	HSTIFENLANKADR	D
5	gi|29726565	Chain A, Human Serum Transferrin, N-Lobe	1344	36533	91	57	40	31	76.1	1119	1	0	0	900.961	1799.91	2	1799.91	-0.0023	1	9.37	0.61	K	EDPQTFYYAVAVVKK	D
5	gi|29726565	Chain A, Human Serum Transferrin, N-Lobe	1344	36533	91	57	40	31	76.1	1212	1	0	0	932.453	1862.89	2	1862.89	0.0005	2	41.77	0.00012	K	DKSKEFQLFSSPHGK	D
5	gi|29726565	Chain A, Human Serum Transferrin, N-Lobe	1344	36533	91	57	40	31	76.1	1244	1	0	0	941.441	1880.87	2	1880.87	-0.001	1	64.6	5.8e-06	K	ADRDQYELLCLDNTR	K
5	gi|29726565	Chain A, Human Serum Transferrin, N-Lobe	1344	36533	91	57	40	31	76.1	1301	1	0	0	642.302	1923.88	3	1923.87	0.01	1	18.84	0.085	K	ADRDQYELLCLDNTR	K
5	gi|29726565	Chain A, Human Serum Transferrin, N-Lobe	1344	36533	91	57	40	31	76.1	1302	1	0	0	962.952	1923.89	2	1923.87	0.015	1	27.09	0.011	K	ADRDQYELLCLDNTR	K
5	gi|29726565	Chain A, Human Serum Transferrin, N-Lobe	1344	36533	91	57	40	31	76.1	1312	1	0	0	646.004	1934.99	3	1934.99	0.0017	1	16.29	0.18	K	EFQLFSSPHGKDLLFK	D
5	gi|29726565	Chain A, Human Serum Transferrin, N-Lobe	1344	36533	91	57	40	31	76.1	1313	1	0	0	968.503	1934.99	2	1934.99	0.0028	1	21.99	0.01	K	EFQLFSSPHGKDLLFK	D
5	gi|29726565	Chain A, Human Serum Transferrin, N-Lobe	1344	36533	91	57	40	31	76.1	1361	1	0	0	990.007	1978	2	1977.99	0.0044	1	14.54	0.058	K	EFQLFSSPHGKDLLFK	D
5	gi|29726565	Chain A, Human Serum Transferrin, N-Lobe	1344	36533	91	57	40	31	76.1	1386	1	0	1	1006.98	2011.94	2	2011.95	-0.0005	1	52.34	1.3e-05	R	DHMKSVIPSDGPSVACVK	K
5	gi|29726565	Chain A, Human Serum Transferrin, N-Lobe	1344	36533	91	57	40	31	76.1	1401	1	0	0	680.302	2037.88	3	2037.88	0.0059	1	77.23	1.4e-07	R	WCAVSEHEATKCQSFR	D
5	gi|29726565	Chain A, Human Serum Transferrin, N-Lobe	1344	36533	91	57	40	31	76.1	1432	1	0	0	690.683	2069.03	3	2069.02	0.0045	0	29.92	0.0016	K	EDLIWELLNQAQEHFGK	D
5	gi|29726565	Chain A, Human Serum Transferrin, N-Lobe	1344	36533	91	57	40	31	76.1	1433	1	0	0	1035.52	2069.03	2	2069.02	0.0047	0	46.26	0.00075	K	EDLIWELLNQAQEHFGK	D
5	gi|29726565	Chain A, Human Serum Transferrin, N-Lobe	1344	36533	91	57	40	31	76.1	1450	1	0	0	1041.45	2080.88	2	2080.88	-0.0025	1	8.68	0.25	R	WCAVSEHEATKCQSFR	D
5	gi|29726565	Chain A, Human Serum Transferrin, N-Lobe	1344	36533	91	57	40	31	76.1	1549	1	0	0	724.372	2170.09	3	2170.09	0.0064	0	71.3	4.4e-06	R	SAGWNIPIGLLYCDLPEPR	K
5	gi|29726565	Chain A, Human Serum Transferrin, N-Lobe	1344	36533	91	57	40	31	76.1	1550	1	0	0	1086.06	2170.1	2	2170.09	0.009	0	60.29	1.8e-05	R	SAGWNIPIGLLYCDLPEPR	K
5	gi|29726565	Chain A, Human Serum Transferrin, N-Lobe	1344	36533	91	57	40	31	76.1	1567	1	0	0	732.049	2193.13	3	2193.12	0.0039	2	4.39	0.55	K	SKEFQLFSSPHGKDLLFK	D
5	gi|29726565	Chain A, Human Serum Transferrin, N-Lobe	1344	36533	91	57	40	31	76.1	1586	1	0	0	1107.56	2213.1	2	2213.09	0.0033	0	45.38	0.00015	R	SAGWNIPIGLLYCDLPEPR	K
5	gi|29726565	Chain A, Human Serum Transferrin, N-Lobe	1344	36533	91	57	40	31	76.1	1643	1	0	0	759.382	2275.12	3	2275.12	0	1	42.59	0.13	K	DGAGDVAFVKHSTIFENLANK	A
5	gi|29726565	Chain A, Human Serum Transferrin, N-Lobe	1344	36533	91	57	40	31	76.1	1644	1	0	0	1138.57	2275.13	2	2275.12	0.0041	1	45.29	0.0072	K	DGAGDVAFVKHSTIFENLANK	A
5	gi|29726565	Chain A, Human Serum Transferrin, N-Lobe	1344	36533	91	57	40	31	76.1	1686	1	0	0	773.718	2318.13	3	2318.13	0.0043	1	24.86	0.028	K	DGAGDVAFVKHSTIFENLANK	A
5	gi|29726565	Chain A, Human Serum Transferrin, N-Lobe	1344	36533	91	57	40	31	76.1	1687	1	0	0	1160.07	2318.13	2	2318.13	0.0053	1	34.57	0.00089	K	DGAGDVAFVKHSTIFENLANK	A
5	gi|29726565	Chain A, Human Serum Transferrin, N-Lobe	1344	36533	91	57	40	31	76.1	1710	1	0	0	786.055	2355.14	3	2355.15	-0.0066	1	9.07	0.18	K	EDLIWELLNQAQEHFGKDK	S
5	gi|29726565	Chain A, Human Serum Transferrin, N-Lobe	1344	36533	91	57	40	31	76.1	1711	1	0	0	1178.58	2355.15	2	2355.15	0.0022	1	23.19	0.0088	K	EDLIWELLNQAQEHFGKDK	S
5	gi|29726565	Chain A, Human Serum Transferrin, N-Lobe	1344	36533	91	57	40	31	76.1	1739	1	0	0	800.393	2398.16	3	2398.16	0.0016	1	2.23	0.9	K	EDLIWELLNQAQEHFGKDK	S
5	gi|29726565	Chain A, Human Serum Transferrin, N-Lobe	1344	36533	91	57	40	31	76.1	1740	1	0	0	1200.09	2398.16	2	2398.16	0.0019	1	4.19	0.57	K	EDLIWELLNQAQEHFGKDK	S
5	gi|29726565	Chain A, Human Serum Transferrin, N-Lobe	1344	36533	91	57	40	31	76.1	1825	1	0	1	844.085	2529.23	3	2529.23	0.0013	1	42.4	0.00073	R	SMGGKEDLIWELLNQAQEHFGK	D
5	gi|29726565	Chain A, Human Serum Transferrin, N-Lobe	1344	36533	91	57	40	31	76.1	1847	1	0	1	637.315	2545.23	4	2545.23	0.0034	1	1.27	0.76	R	SMGGKEDLIWELLNQAQEHFGK	D
5	gi|29726565	Chain A, Human Serum Transferrin, N-Lobe	1344	36533	91	57	40	31	76.1	1852	1	0	0	638.08	2548.29	4	2548.29	0.0033	1	60.71	2.5e-06	R	KPVDEYKDCHLAQVPSHTVVAR	S
5	gi|29726565	Chain A, Human Serum Transferrin, N-Lobe	1344	36533	91	57	40	31	76.1	1869	1	0	1	858.419	2572.23	3	2572.24	-0.0037	1	5.46	0.49	R	SMGGKEDLIWELLNQAQEHFGK	D
5	gi|29726565	Chain A, Human Serum Transferrin, N-Lobe	1344	36533	91	57	40	31	76.1	1870	1	0	1	1287.13	2572.24	2	2572.24	-0.0003	1	25.58	0.004	R	SMGGKEDLIWELLNQAQEHFGK	D
5	gi|29726565	Chain A, Human Serum Transferrin, N-Lobe	1344	36533	91	57	40	31	76.1	1871	1	0	1	858.421	2572.24	3	2572.24	0.0029	1	41.22	0.00027	R	SMGGKEDLIWELLNQAQEHFGK	D
5	gi|29726565	Chain A, Human Serum Transferrin, N-Lobe	1344	36533	91	57	40	31	76.1	1872	1	0	1	1287.13	2572.24	2	2572.24	0.0053	1	33.27	0.0019	R	SMGGKEDLIWELLNQAQEHFGK	D
5	gi|29726565	Chain A, Human Serum Transferrin, N-Lobe	1344	36533	91	57	40	31	76.1	1873	3	0	1	858.422	2572.24	3	2572.24	0.0062	1	1.62	1	R	SMGGKEDLIWELLNQAQEHFGK	D
5	gi|29726565	Chain A, Human Serum Transferrin, N-Lobe	1344	36533	91	57	40	31	76.1	1893	1	0	1	863.752	2588.23	3	2588.23	0.0016	1	19.08	0.016	R	SMGGKEDLIWELLNQAQEHFGK	D
5	gi|29726565	Chain A, Human Serum Transferrin, N-Lobe	1344	36533	91	57	40	31	76.1	1897	1	0	0	648.832	2591.3	4	2591.29	0.007	1	48.51	3.2e-05	R	KPVDEYKDCHLAQVPSHTVVAR	S
5	gi|29726565	Chain A, Human Serum Transferrin, N-Lobe	1344	36533	91	57	40	31	76.1	1912	1	0	0	1304.65	2607.28	2	2607.28	-0.0009	2	40.71	0.06	K	SVIPSDGPSVACVKKASYLDCIR	A
5	gi|29726565	Chain A, Human Serum Transferrin, N-Lobe	1344	36533	91	57	40	31	76.1	1913	1	0	0	870.101	2607.28	3	2607.28	0.0033	2	27.23	0.26	K	SVIPSDGPSVACVKKASYLDCIR	A
5	gi|29726565	Chain A, Human Serum Transferrin, N-Lobe	1344	36533	91	57	40	31	76.1	1917	1	0	1	872.753	2615.24	3	2615.24	-0.0054	1	1.61	0.74	R	SMGGKEDLIWELLNQAQEHFGK	D
5	gi|29726565	Chain A, Human Serum Transferrin, N-Lobe	1344	36533	91	57	40	31	76.1	1934	1	0	0	879.107	2634.3	3	2634.3	0.0019	1	50.4	0.021	R	KPVDEYKDCHLAQVPSHTVVAR	S
5	gi|29726565	Chain A, Human Serum Transferrin, N-Lobe	1344	36533	91	57	40	31	76.1	1935	1	0	0	659.582	2634.3	4	2634.3	0.0032	1	20.34	0.76	R	KPVDEYKDCHLAQVPSHTVVAR	S
5	gi|29726565	Chain A, Human Serum Transferrin, N-Lobe	1344	36533	91	57	40	31	76.1	1949	1	0	0	886.436	2656.29	3	2656.29	-0.0013	2	4.69	0.52	K	EDLIWELLNQAQEHFGKDKSK	E
5	gi|29726565	Chain A, Human Serum Transferrin, N-Lobe	1344	36533	91	57	40	31	76.1	1964	1	0	0	893.443	2677.31	3	2677.3	0.0056	1	59.46	2.7e-06	R	KPVDEYKDCHLAQVPSHTVVAR	S
5	gi|29726565	Chain A, Human Serum Transferrin, N-Lobe	1344	36533	91	57	40	31	76.1	1994	1	0	0	907.453	2719.34	3	2719.34	-0.0016	2	30.28	0.51	K	CLKDGAGDVAFVKHSTIFENLANK	A
5	gi|29726565	Chain A, Human Serum Transferrin, N-Lobe	1344	36533	91	57	40	31	76.1	2037	1	0	1	939.454	2815.34	3	2815.36	-0.0209	2	12.81	0.063	R	SMGGKEDLIWELLNQAQEHFGKDK	S
5	gi|29726565	Chain A, Human Serum Transferrin, N-Lobe	1344	36533	91	57	40	31	76.1	2038	1	0	1	939.461	2815.36	3	2815.36	0.0019	2	20.71	0.011	R	SMGGKEDLIWELLNQAQEHFGKDK	S
5	gi|29726565	Chain A, Human Serum Transferrin, N-Lobe	1344	36533	91	57	40	31	76.1	2039	1	0	1	704.848	2815.36	4	2815.36	0.0042	2	6.84	0.85	R	SMGGKEDLIWELLNQAQEHFGKDK	S
5	gi|29726565	Chain A, Human Serum Transferrin, N-Lobe	1344	36533	91	57	40	31	76.1	2041	1	0	1	704.85	2815.37	4	2815.36	0.011	2	10.84	0.096	R	SMGGKEDLIWELLNQAQEHFGKDK	S
5	gi|29726565	Chain A, Human Serum Transferrin, N-Lobe	1344	36533	91	57	40	31	76.1	2051	1	0	0	709.363	2833.42	4	2833.42	0.0025	2	21.77	0.12	K	EFQLFSSPHGKDLLFKDSAHGFLK	V
5	gi|29726565	Chain A, Human Serum Transferrin, N-Lobe	1344	36533	91	57	40	31	76.1	2052	1	0	0	945.481	2833.42	3	2833.42	0.0036	2	25.81	0.018	K	EFQLFSSPHGKDLLFKDSAHGFLK	V
5	gi|29726565	Chain A, Human Serum Transferrin, N-Lobe	1344	36533	91	57	40	31	76.1	2072	1	0	1	953.797	2858.37	3	2858.37	0.0032	2	33.11	0.00079	R	SMGGKEDLIWELLNQAQEHFGKDK	S
5	gi|29726565	Chain A, Human Serum Transferrin, N-Lobe	1344	36533	91	57	40	31	76.1	2073	1	0	1	953.797	2858.37	3	2858.37	0.0041	2	26.38	0.017	R	SMGGKEDLIWELLNQAQEHFGKDK	S
5	gi|29726565	Chain A, Human Serum Transferrin, N-Lobe	1344	36533	91	57	40	31	76.1	2083	1	0	0	959.816	2876.43	3	2876.42	0.0028	2	12.23	0.081	K	EFQLFSSPHGKDLLFKDSAHGFLK	V
5	gi|29726565	Chain A, Human Serum Transferrin, N-Lobe	1344	36533	91	57	40	31	76.1	2187	1	0	0	795.636	3178.51	4	3178.51	0.0032	2	30.69	0.0016	K	HSTIFENLANKADRDQYELLCLDNTR	K
5	gi|29726565	Chain A, Human Serum Transferrin, N-Lobe	1344	36533	91	57	40	31	76.1	2188	1	0	0	1060.51	3178.52	3	3178.51	0.007	2	32.48	0.18	K	HSTIFENLANKADRDQYELLCLDNTR	K
5	gi|29726565	Chain A, Human Serum Transferrin, N-Lobe	1344	36533	91	57	40	31	76.1	2205	1	0	0	806.387	3221.52	4	3221.52	0.0034	2	43.92	0.00022	K	HSTIFENLANKADRDQYELLCLDNTR	K
5	gi|29726565	Chain A, Human Serum Transferrin, N-Lobe	1344	36533	91	57	40	31	76.1	2206	1	0	0	1074.85	3221.52	3	3221.52	0.0077	2	9.01	0.14	K	HSTIFENLANKADRDQYELLCLDNTR	K
5	gi|29726565	Chain A, Human Serum Transferrin, N-Lobe	1344	36533	91	57	40	31	76.1	2315	1	0	0	989.26	3953.01	4	3953.01	0.0027	0	61.54	1.7e-06	R	AIAANEADAVTLDAGLVYDAYLAPNNLKPVVAEFYGSK	E
5	gi|29726565	Chain A, Human Serum Transferrin, N-Lobe	1344	36533	91	57	40	31	76.1	2316	1	0	0	1318.68	3953.02	3	3953.01	0.006	0	45.29	5.7e-05	R	AIAANEADAVTLDAGLVYDAYLAPNNLKPVVAEFYGSK	E
5	gi|29726565	Chain A, Human Serum Transferrin, N-Lobe	1344	36533	91	57	40	31	76.1	2317	1	0	0	1333.01	3996.02	3	3996.02	0.0001	0	47.34	3.6e-05	R	AIAANEADAVTLDAGLVYDAYLAPNNLKPVVAEFYGSK	E
5	gi|29726565	Chain A, Human Serum Transferrin, N-Lobe	1344	36533	91	57	40	31	76.1	2318	1	0	0	1000.01	3996.02	4	3996.02	0.0033	0	44.58	0.0003	R	AIAANEADAVTLDAGLVYDAYLAPNNLKPVVAEFYGSK	E
5	gi|7245524	Chain A, Human Serum Transferrin	1171	36329	78	49	35	27	73.3	1869	1	0	1	858.419	2572.23	3	2572.24	-0.0037	1	5.46	0.49	R	SMGGKEDLIWELLNQAQEHFGK	D
5	gi|7245524	Chain A, Human Serum Transferrin	1171	36329	78	49	35	27	73.3	1870	1	0	1	1287.13	2572.24	2	2572.24	-0.0003	1	25.58	0.004	R	SMGGKEDLIWELLNQAQEHFGK	D
5	gi|7245524	Chain A, Human Serum Transferrin	1171	36329	78	49	35	27	73.3	1871	1	0	1	858.421	2572.24	3	2572.24	0.0029	1	41.22	0.00027	R	SMGGKEDLIWELLNQAQEHFGK	D
5	gi|7245524	Chain A, Human Serum Transferrin	1171	36329	78	49	35	27	73.3	1872	1	0	1	1287.13	2572.24	2	2572.24	0.0053	1	33.27	0.0019	R	SMGGKEDLIWELLNQAQEHFGK	D
5	gi|7245524	Chain A, Human Serum Transferrin	1171	36329	78	49	35	27	73.3	1873	3	0	1	858.422	2572.24	3	2572.24	0.0062	1	1.62	1	R	SMGGKEDLIWELLNQAQEHFGK	D
5	gi|7245524	Chain A, Human Serum Transferrin	1171	36329	78	49	35	27	73.3	1893	1	0	1	863.752	2588.23	3	2588.23	0.0016	1	19.08	0.016	R	SMGGKEDLIWELLNQAQEHFGK	D
5	gi|7245524	Chain A, Human Serum Transferrin	1171	36329	78	49	35	27	73.3	1897	1	0	0	648.832	2591.3	4	2591.29	0.007	1	48.51	3.2e-05	R	KPVDEYKDCHLAQVPSHTVVAR	S
5	gi|7245524	Chain A, Human Serum Transferrin	1171	36329	78	49	35	27	73.3	1912	1	0	0	1304.65	2607.28	2	2607.28	-0.0009	2	40.71	0.06	K	SVIPSDGPSVACVKKASYLDCIR	A
5	gi|7245524	Chain A, Human Serum Transferrin	1171	36329	78	49	35	27	73.3	1913	1	0	0	870.101	2607.28	3	2607.28	0.0033	2	27.23	0.26	K	SVIPSDGPSVACVKKASYLDCIR	A
5	gi|7245524	Chain A, Human Serum Transferrin	1171	36329	78	49	35	27	73.3	1917	1	0	1	872.753	2615.24	3	2615.24	-0.0054	1	1.61	0.74	R	SMGGKEDLIWELLNQAQEHFGK	D
5	gi|7245524	Chain A, Human Serum Transferrin	1171	36329	78	49	35	27	73.3	1934	1	0	0	879.107	2634.3	3	2634.3	0.0019	1	50.4	0.021	R	KPVDEYKDCHLAQVPSHTVVAR	S
5	gi|7245524	Chain A, Human Serum Transferrin	1171	36329	78	49	35	27	73.3	1935	1	0	0	659.582	2634.3	4	2634.3	0.0032	1	20.34	0.76	R	KPVDEYKDCHLAQVPSHTVVAR	S
5	gi|7245524	Chain A, Human Serum Transferrin	1171	36329	78	49	35	27	73.3	1949	1	0	0	886.436	2656.29	3	2656.29	-0.0013	2	4.69	0.52	K	EDLIWELLNQAQEHFGKDKSK	E
5	gi|7245524	Chain A, Human Serum Transferrin	1171	36329	78	49	35	27	73.3	1964	1	0	0	893.443	2677.31	3	2677.3	0.0056	1	59.46	2.7e-06	R	KPVDEYKDCHLAQVPSHTVVAR	S
5	gi|7245524	Chain A, Human Serum Transferrin	1171	36329	78	49	35	27	73.3	2037	1	0	1	939.454	2815.34	3	2815.36	-0.0209	2	12.81	0.063	R	SMGGKEDLIWELLNQAQEHFGKDK	S
5	gi|7245524	Chain A, Human Serum Transferrin	1171	36329	78	49	35	27	73.3	2038	1	0	1	939.461	2815.36	3	2815.36	0.0019	2	20.71	0.011	R	SMGGKEDLIWELLNQAQEHFGKDK	S
5	gi|7245524	Chain A, Human Serum Transferrin	1171	36329	78	49	35	27	73.3	2039	1	0	1	704.848	2815.36	4	2815.36	0.0042	2	6.84	0.85	R	SMGGKEDLIWELLNQAQEHFGKDK	S
5	gi|7245524	Chain A, Human Serum Transferrin	1171	36329	78	49	35	27	73.3	2041	1	0	1	704.85	2815.37	4	2815.36	0.011	2	10.84	0.096	R	SMGGKEDLIWELLNQAQEHFGKDK	S
5	gi|7245524	Chain A, Human Serum Transferrin	1171	36329	78	49	35	27	73.3	2051	1	0	0	709.363	2833.42	4	2833.42	0.0025	2	21.77	0.12	K	EFQLFSSPHGKDLLFKDSAHGFLK	V
5	gi|7245524	Chain A, Human Serum Transferrin	1171	36329	78	49	35	27	73.3	2052	1	0	0	945.481	2833.42	3	2833.42	0.0036	2	25.81	0.018	K	EFQLFSSPHGKDLLFKDSAHGFLK	V
5	gi|7245524	Chain A, Human Serum Transferrin	1171	36329	78	49	35	27	73.3	2072	1	0	1	953.797	2858.37	3	2858.37	0.0032	2	33.11	0.00079	R	SMGGKEDLIWELLNQAQEHFGKDK	S
5	gi|7245524	Chain A, Human Serum Transferrin	1171	36329	78	49	35	27	73.3	2073	1	0	1	953.797	2858.37	3	2858.37	0.0041	2	26.38	0.017	R	SMGGKEDLIWELLNQAQEHFGKDK	S
5	gi|7245524	Chain A, Human Serum Transferrin	1171	36329	78	49	35	27	73.3	2083	1	0	0	959.816	2876.43	3	2876.42	0.0028	2	12.23	0.081	K	EFQLFSSPHGKDLLFKDSAHGFLK	V
5	gi|7245524	Chain A, Human Serum Transferrin	1171	36329	78	49	35	27	73.3	2315	1	0	0	989.26	3953.01	4	3953.01	0.0027	0	61.54	1.7e-06	R	AIAANEADAVTLDAGLVYDAYLAPNNLKPVVAEFYGSK	E
5	gi|7245524	Chain A, Human Serum Transferrin	1171	36329	78	49	35	27	73.3	2316	1	0	0	1318.68	3953.02	3	3953.01	0.006	0	45.29	5.7e-05	R	AIAANEADAVTLDAGLVYDAYLAPNNLKPVVAEFYGSK	E
5	gi|7245524	Chain A, Human Serum Transferrin	1171	36329	78	49	35	27	73.3	2317	1	0	0	1333.01	3996.02	3	3996.02	0.0001	0	47.34	3.6e-05	R	AIAANEADAVTLDAGLVYDAYLAPNNLKPVVAEFYGSK	E
5	gi|7245524	Chain A, Human Serum Transferrin	1171	36329	78	49	35	27	73.3	2318	1	0	0	1000.01	3996.02	4	3996.02	0.0033	0	44.58	0.0003	R	AIAANEADAVTLDAGLVYDAYLAPNNLKPVVAEFYGSK	E
6	gi|3722223	transferrin [Homo sapiens]	368	7093	14	11	6	5	77	1378	1	0	0	998.479	1994.94	2	1994.94	0.0069	1	66.07	0.00069	K	NLNEKDYELLCLDGTR	K
6	gi|3722223	transferrin [Homo sapiens]	368	7093	14	11	6	5	77	2034	1	0	0	935.448	2803.32	3	2803.32	-0.0004	2	88.49	9e-09	K	NPDPWAKNLNEKDYELLCLDGTR	K
6	gi|339989	transferrin, partial [Homo sapiens]	302	7066	17	12	12	9	88.5	10	3	0	0	706.39	705.383	1	705.381	0.0022	0	19.57	1.2	K	DLLFR	D
6	gi|339989	transferrin, partial [Homo sapiens]	302	7066	17	12	12	9	88.5	126	5	0	0	500.753	999.492	2	999.491	0.0008	0	3.53	1.1	K	YLGEEYVK	A
6	gi|339989	transferrin, partial [Homo sapiens]	302	7066	17	12	12	9	88.5	256	1	0	0	576.308	1150.6	2	1150.6	0.0036	1	38.44	0.048	R	SETKDLLFR	D
6	gi|339989	transferrin, partial [Homo sapiens]	302	7066	17	12	12	9	88.5	672	1	0	0	743.361	1484.71	2	1484.7	0.0039	1	51.57	0.018	R	DDTVCLAKLHDR	N
6	gi|339989	transferrin, partial [Homo sapiens]	302	7066	17	12	12	9	88.5	733	1	0	0	764.863	1527.71	2	1527.71	0.0021	1	38.93	0.0012	R	DDTVCLAKLHDR	N
6	gi|339989	transferrin, partial [Homo sapiens]	302	7066	17	12	12	9	88.5	737	1	0	0	766.35	1530.69	2	1530.68	0.0048	0	79.28	1.4e-07	K	CSTSSLLEACTFR	-
6	gi|339989	transferrin, partial [Homo sapiens]	302	7066	17	12	12	9	88.5	789	1	0	0	783.403	1564.79	2	1564.79	-0.0011	1	41.01	0.0041	K	DLLFRDDTVCLAK	L
6	gi|339989	transferrin, partial [Homo sapiens]	302	7066	17	12	12	9	88.5	802	1	0	0	787.851	1573.69	2	1573.69	0.0018	0	66.83	5e-06	K	CSTSSLLEACTFR	-
6	gi|339989	transferrin, partial [Homo sapiens]	302	7066	17	12	12	9	88.5	921	1	0	0	827.433	1652.85	2	1652.85	0.0003	1	43.77	0.1	K	YLGEEYVKAVGNLR	K
6	gi|339989	transferrin, partial [Homo sapiens]	302	7066	17	12	12	9	88.5	963	1	0	0	839.904	1677.79	2	1677.79	0.0047	1	40.27	0.026	R	NTYEKYLGEEYVK	A
6	gi|339989	transferrin, partial [Homo sapiens]	302	7066	17	12	12	9	88.5	983	1	0	0	848.935	1695.86	2	1695.86	-0.003	1	37.58	0.00069	K	YLGEEYVKAVGNLR	K
6	gi|339989	transferrin, partial [Homo sapiens]	302	7066	17	12	12	9	88.5	989	1	0	0	851.899	1701.78	2	1701.78	0.0014	1	82.13	4.4e-08	R	KCSTSSLLEACTFR	-
6	gi|339989	transferrin, partial [Homo sapiens]	302	7066	17	12	12	9	88.5	990	1	0	0	851.899	1701.78	2	1701.78	0.003	1	29.95	0.0016	R	KCSTSSLLEACTFR	-
6	gi|339989	transferrin, partial [Homo sapiens]	302	7066	17	12	12	9	88.5	1475	1	0	0	1049.02	2096.02	2	2096.02	0.001	2	7.9	0.37	R	SETKDLLFRDDTVCLAK	L
6	gi|339989	transferrin, partial [Homo sapiens]	302	7066	17	12	12	9	88.5	1556	1	0	0	725.032	2172.08	3	2172.07	0.0005	2	44.23	0.00032	K	DLLFRDDTVCLAKLHDR	N
6	gi|339989	transferrin, partial [Homo sapiens]	302	7066	17	12	12	9	88.5	1693	1	0	0	778.056	2331.15	3	2331.15	-0.0042	2	16	0.27	R	NTYEKYLGEEYVKAVGNLR	K
6	gi|339989	transferrin, partial [Homo sapiens]	302	7066	17	12	12	9	88.5	1694	1	0	0	1166.58	2331.15	2	2331.15	-0.0006	2	56.18	0.00025	R	NTYEKYLGEEYVKAVGNLR	K
6	gi|339485	transferrin precursor (AA at 8), partial [Homo sapiens]	180	7699	11	6	8	6	59.7	123	1	0	0	499.243	996.47	2	996.47	0.0006	0	23.33	0.051	K	ASYLDCIR	A
6	gi|339485	transferrin precursor (AA at 8), partial [Homo sapiens]	180	7699	11	6	8	6	59.7	223	1	0	0	563.291	1124.57	2	1124.56	0.002	1	31.63	0.062	K	KASYLDCIR	A
6	gi|339485	transferrin precursor (AA at 8), partial [Homo sapiens]	180	7699	11	6	8	6	59.7	276	1	0	0	584.793	1167.57	2	1167.57	0.0014	1	46.3	0.0013	K	KASYLDCIR	A
6	gi|339485	transferrin precursor (AA at 8), partial [Homo sapiens]	180	7699	11	6	8	6	59.7	526	1	0	0	680.803	1359.59	2	1359.59	0.0033	0	38.11	0.0017	R	WCAVSEHEATK	C
6	gi|339485	transferrin precursor (AA at 8), partial [Homo sapiens]	180	7699	11	6	8	6	59.7	588	1	0	0	708.365	1414.71	2	1414.71	0.002	0	76.46	6.1e-05	K	SVIPSDGPSVACVK	K
6	gi|339485	transferrin precursor (AA at 8), partial [Homo sapiens]	180	7699	11	6	8	6	59.7	820	1	0	0	793.915	1585.82	2	1585.81	0.0026	1	35.81	0.7	K	SVIPSDGPSVACVKK	A
6	gi|339485	transferrin precursor (AA at 8), partial [Homo sapiens]	180	7699	11	6	8	6	59.7	1386	1	0	1	1006.98	2011.94	2	2011.95	-0.0005	1	52.34	1.3e-05	R	DHMKSVIPSDGPSVACVK	K
6	gi|339485	transferrin precursor (AA at 8), partial [Homo sapiens]	180	7699	11	6	8	6	59.7	1401	1	0	0	680.302	2037.88	3	2037.88	0.0059	1	77.23	1.4e-07	R	WCAVSEHEATKCQSFR	D
6	gi|339485	transferrin precursor (AA at 8), partial [Homo sapiens]	180	7699	11	6	8	6	59.7	1450	1	0	0	1041.45	2080.88	2	2080.88	-0.0025	1	8.68	0.25	R	WCAVSEHEATKCQSFR	D
6	gi|339485	transferrin precursor (AA at 8), partial [Homo sapiens]	180	7699	11	6	8	6	59.7	1912	1	0	0	1304.65	2607.28	2	2607.28	-0.0009	2	40.71	0.06	K	SVIPSDGPSVACVKKASYLDCIR	A
6	gi|339485	transferrin precursor (AA at 8), partial [Homo sapiens]	180	7699	11	6	8	6	59.7	1913	1	0	0	870.101	2607.28	3	2607.28	0.0033	2	27.23	0.26	K	SVIPSDGPSVACVKKASYLDCIR	A
6	gi|2815575	transferrin [Homo sapiens]	179	7083	9	6	5	4	55.7	321	1	0	0	606.319	1210.62	2	1210.62	-0.0008	1	25.67	0.17	K	EACVHKILR	Q
6	gi|2815575	transferrin [Homo sapiens]	179	7083	9	6	5	4	55.7	520	1	0	0	677.845	1353.67	2	1353.62	0.0512	0	32.53	0.0083	K	DYELLCLDGTR	K
6	gi|2815575	transferrin [Homo sapiens]	179	7083	9	6	5	4	55.7	583	1	0	0	471.253	1410.74	3	1410.74	-0.0018	2	18.54	0.057	K	DKEACVHKILR	Q
6	gi|2815575	transferrin [Homo sapiens]	179	7083	9	6	5	4	55.7	632	1	0	0	727.881	1453.75	2	1453.75	0.0015	2	37.55	0.43	K	DKEACVHKILR	Q
6	gi|2815575	transferrin [Homo sapiens]	179	7083	9	6	5	4	55.7	691	1	0	0	749.384	1496.75	2	1496.75	0.0011	2	36.35	0.0025	K	DKEACVHKILR	Q
6	gi|2815575	transferrin [Homo sapiens]	179	7083	9	6	5	4	55.7	1339	1	0	0	976.974	1951.93	2	1951.93	0.0017	1	79.09	3e-05	K	NLNEKDYELLCLDGTR	K
6	gi|2815575	transferrin [Homo sapiens]	179	7083	9	6	5	4	55.7	1340	1	0	0	651.652	1951.93	3	1951.93	0.0039	1	37.06	0.018	K	NLNEKDYELLCLDGTR	K
6	gi|2815575	transferrin [Homo sapiens]	179	7083	9	6	5	4	55.7	1378	1	0	0	998.479	1994.94	2	1994.94	0.0069	1	66.07	0.00069	K	NLNEKDYELLCLDGTR	K
6	gi|2815575	transferrin [Homo sapiens]	179	7083	9	6	5	4	55.7	2034	1	0	0	935.448	2803.32	3	2803.32	-0.0004	2	88.49	9e-09	K	NPDPWAKNLNEKDYELLCLDGTR	K
6	gi|119599574	transferrin, isoform CRA_e [Homo sapiens]	93	7461	3	2	2	2	23.2	526	1	0	0	680.803	1359.59	2	1359.59	0.0033	0	38.11	0.0017	R	WCAVSEHEATK	C
6	gi|119599574	transferrin, isoform CRA_e [Homo sapiens]	93	7461	3	2	2	2	23.2	1401	1	0	0	680.302	2037.88	3	2037.88	0.0059	1	77.23	1.4e-07	R	WCAVSEHEATKCQSFR	D
6	gi|119599574	transferrin, isoform CRA_e [Homo sapiens]	93	7461	3	2	2	2	23.2	1450	1	0	0	1041.45	2080.88	2	2080.88	-0.0025	1	8.68	0.25	R	WCAVSEHEATKCQSFR	D
6	gi|8980356	transferrin [Homo sapiens]	79	2922	7	3	5	3	82.1	123	1	0	0	499.243	996.47	2	996.47	0.0006	0	23.33	0.051	K	ASYLDCIR	A
6	gi|8980356	transferrin [Homo sapiens]	79	2922	7	3	5	3	82.1	223	1	0	0	563.291	1124.57	2	1124.56	0.002	1	31.63	0.062	K	KASYLDCIR	A
6	gi|8980356	transferrin [Homo sapiens]	79	2922	7	3	5	3	82.1	276	1	0	0	584.793	1167.57	2	1167.57	0.0014	1	46.3	0.0013	K	KASYLDCIR	A
6	gi|8980356	transferrin [Homo sapiens]	79	2922	7	3	5	3	82.1	588	1	0	0	708.365	1414.71	2	1414.71	0.002	0	76.46	6.1e-05	K	SVIPSDGPSVACVK	K
6	gi|8980356	transferrin [Homo sapiens]	79	2922	7	3	5	3	82.1	820	1	0	0	793.915	1585.82	2	1585.81	0.0026	1	35.81	0.7	K	SVIPSDGPSVACVKK	A
6	gi|8980356	transferrin [Homo sapiens]	79	2922	7	3	5	3	82.1	1912	1	0	0	1304.65	2607.28	2	2607.28	-0.0009	2	40.71	0.06	K	SVIPSDGPSVACVKKASYLDCIR	A
6	gi|8980356	transferrin [Homo sapiens]	79	2922	7	3	5	3	82.1	1913	1	0	0	870.101	2607.28	3	2607.28	0.0033	2	27.23	0.26	K	SVIPSDGPSVACVKKASYLDCIR	A
6	gi|119599570	transferrin, isoform CRA_a [Homo sapiens]	38	7774	1	1	1	1	15.7	526	1	0	0	680.803	1359.59	2	1359.59	0.0033	0	38.11	0.0017	R	WCAVSEHEATK	C
7	gi|48425723	Chain E, Structure Of Human Transferrin Receptor-transferrin Complex	29	38222	9	1	5	1	17.7	10	3	0	0	706.39	705.383	1	705.381	0.0022	0	19.57	1.2	K	DLLFR	D
7	gi|48425723	Chain E, Structure Of Human Transferrin Receptor-transferrin Complex	29	38222	9	1	5	1	17.7	237	3	0	1	567.291	1132.57	2	1132.57	0.0012	2	8.74	1.2	K	DKAACVKQK	L
7	gi|48425723	Chain E, Structure Of Human Transferrin Receptor-transferrin Complex	29	38222	9	1	5	1	17.7	570	1	0	0	704.37	1406.73	2	1406.72	0.0035	1	42.57	0.057	R	CLVEKGDVAFVK	S
7	gi|48425723	Chain E, Structure Of Human Transferrin Receptor-transferrin Complex	29	38222	9	1	5	1	17.7	571	1	0	0	704.371	1406.73	2	1406.72	0.0045	1	7.52	0.53	R	CLVEKGDVAFVK	S
7	gi|48425723	Chain E, Structure Of Human Transferrin Receptor-transferrin Complex	29	38222	9	1	5	1	17.7	628	1	0	0	725.869	1449.72	2	1449.73	-0.0058	1	29.48	0.0072	R	CLVEKGDVAFVK	S
7	gi|48425723	Chain E, Structure Of Human Transferrin Receptor-transferrin Complex	29	38222	9	1	5	1	17.7	1339	2	0	1	976.974	1951.93	2	1951.92	0.013	1	35.14	0.76	K	DLKEEDFELLCLDGTR	K
7	gi|48425723	Chain E, Structure Of Human Transferrin Receptor-transferrin Complex	29	38222	9	1	5	1	17.7	1340	2	0	1	651.652	1951.93	3	1951.92	0.0151	1	17.24	1.7	K	DLKEEDFELLCLDGTR	K
7	gi|48425723	Chain E, Structure Of Human Transferrin Receptor-transferrin Complex	29	38222	9	1	5	1	17.7	1378	3	0	1	998.479	1994.94	2	1994.93	0.0181	1	29.4	3.2	K	DLKEEDFELLCLDGTR	K
7	gi|48425723	Chain E, Structure Of Human Transferrin Receptor-transferrin Complex	29	38222	9	1	5	1	17.7	1668	2	0	1	768.046	2301.12	3	2301.13	-0.0091	1	5.65	1.1	R	TAGWNIPMGLLYNRINHCR	F
8	gi|377656551	Chain A, Alpha-2 Macroglobulin	1638	160691	109	81	65	50	51.3	106	1	1	1	484.781	967.546	2	967.545	0.0014	0	12.68	0.22	R	TGTHGLLVK	Q
8	gi|377656551	Chain A, Alpha-2 Macroglobulin	1638	160691	109	81	65	50	51.3	139	3	1	1	509.797	1017.58	2	1017.59	-0.0064	0	10.56	0.74	K	ATVLNYLPK	C
8	gi|377656551	Chain A, Alpha-2 Macroglobulin	1638	160691	109	81	65	50	51.3	160	1	1	1	523.8	1045.58	2	1045.58	0.0038	0	11.2	0.23	K	FEVQVTVPK	I
8	gi|377656551	Chain A, Alpha-2 Macroglobulin	1638	160691	109	81	65	50	51.3	188	1	1	1	540.328	1078.64	2	1078.64	0.0022	1	12.48	0.4	R	TITKLSFVK	V
8	gi|377656551	Chain A, Alpha-2 Macroglobulin	1638	160691	109	81	65	50	51.3	190	1	1	1	542.811	1083.61	2	1083.61	-0.0002	0	23.03	0.17	K	GHFSISIPVK	S
8	gi|377656551	Chain A, Alpha-2 Macroglobulin	1638	160691	109	81	65	50	51.3	206	1	1	1	553.329	1104.64	2	1104.64	0.0039	2	13.41	0.24	K	TKVFQLKR	K
8	gi|377656551	Chain A, Alpha-2 Macroglobulin	1638	160691	109	81	65	50	51.3	211	1	1	1	558.796	1115.58	2	1115.6	-0.0199	0	34.54	0.0059	R	QTVSWAVTPK	S
8	gi|377656551	Chain A, Alpha-2 Macroglobulin	1638	160691	109	81	65	50	51.3	229	1	1	1	564.316	1126.62	2	1126.61	0.0038	0	22.43	0.11	K	GHFSISIPVK	S
8	gi|377656551	Chain A, Alpha-2 Macroglobulin	1638	160691	109	81	65	50	51.3	238	1	1	1	567.797	1133.58	2	1133.58	0.0036	0	30.33	0.0051	R	SASNMAIVDVK	M
8	gi|377656551	Chain A, Alpha-2 Macroglobulin	1638	160691	109	81	65	50	51.3	251	1	1	1	574.814	1147.61	2	1147.61	-0.001	0	30.32	0.013	R	QGIPFFGQVR	L
8	gi|377656551	Chain A, Alpha-2 Macroglobulin	1638	160691	109	81	65	50	51.3	320	1	1	1	605.826	1209.64	2	1209.64	0.0029	0	48.07	0.00018	K	LPPNVVEESAR	A
8	gi|377656551	Chain A, Alpha-2 Macroglobulin	1638	160691	109	81	65	50	51.3	345	1	1	1	613.281	1224.55	2	1224.54	0.0038	0	32.16	0.0029	K	YDVENCLANK	V
8	gi|377656551	Chain A, Alpha-2 Macroglobulin	1638	160691	109	81	65	50	51.3	386	1	1	1	628.326	1254.64	2	1254.64	0.0014	0	58.02	5e-05	K	AIGYLNTGYQR	Q
8	gi|377656551	Chain A, Alpha-2 Macroglobulin	1638	160691	109	81	65	50	51.3	391	1	1	1	630.292	1258.57	2	1258.57	0.0046	0	89.12	1e-07	R	VGFYESDVMGR	G
8	gi|377656551	Chain A, Alpha-2 Macroglobulin	1638	160691	109	81	65	50	51.3	406	1	1	1	636.841	1271.67	2	1271.67	0.0026	0	71.15	7.5e-06	R	VTAAPQSVCALR	A
8	gi|377656551	Chain A, Alpha-2 Macroglobulin	1638	160691	109	81	65	50	51.3	424	1	1	1	640.374	1278.73	2	1278.73	0.0029	1	14.05	0.55	R	LVDGKGVPIPNK	V
8	gi|377656551	Chain A, Alpha-2 Macroglobulin	1638	160691	109	81	65	50	51.3	449	1	1	1	649.828	1297.64	2	1297.64	-0.0008	0	32.32	0.026	K	AIGYLNTGYQR	Q
8	gi|377656551	Chain A, Alpha-2 Macroglobulin	1638	160691	109	81	65	50	51.3	545	1	1	1	689.368	1376.72	2	1376.72	0.0006	1	54.59	0.0038	K	LSFVKVDSHFR	Q
8	gi|377656551	Chain A, Alpha-2 Macroglobulin	1638	160691	109	81	65	50	51.3	562	1	1	1	697.845	1393.68	2	1393.67	0.0029	0	49.43	0.00028	K	NEDSLVFVQTDK	S
8	gi|377656551	Chain A, Alpha-2 Macroglobulin	1638	160691	109	81	65	50	51.3	563	1	1	1	698.429	1394.84	2	1394.84	0.0031	1	43.75	0.027	K	GVPIPNKVIFIR	G
8	gi|377656551	Chain A, Alpha-2 Macroglobulin	1638	160691	109	81	65	50	51.3	566	1	1	1	701.385	1400.76	2	1400.75	0.005	1	14.8	0.11	K	EVLKSLNEEAVK	K
8	gi|377656551	Chain A, Alpha-2 Macroglobulin	1638	160691	109	81	65	50	51.3	590	1	1	1	709.804	1417.59	2	1417.59	0.0046	0	63.5	8.9e-06	K	HYDGSYSTFGER	Y
8	gi|377656551	Chain A, Alpha-2 Macroglobulin	1638	160691	109	81	65	50	51.3	593	1	1	1	710.389	1418.76	2	1418.76	0.0013	1	31.2	0.0059	K	KLSFYYLIMAK	G
8	gi|377656551	Chain A, Alpha-2 Macroglobulin	1638	160691	109	81	65	50	51.3	597	1	1	1	710.872	1419.73	2	1419.73	0.0027	1	31.39	0.014	K	LSFVKVDSHFR	Q
8	gi|377656551	Chain A, Alpha-2 Macroglobulin	1638	160691	109	81	65	50	51.3	616	1	1	1	719.933	1437.85	2	1437.85	0.0048	1	19.14	0.016	K	GVPIPNKVIFIR	G
8	gi|377656551	Chain A, Alpha-2 Macroglobulin	1638	160691	109	81	65	50	51.3	625	1	1	1	724.827	1447.64	2	1447.64	0.0023	0	57.89	2.7e-05	K	DMYSFLEDMGLK	A
8	gi|377656551	Chain A, Alpha-2 Macroglobulin	1638	160691	109	81	65	50	51.3	641	1	1	1	730.421	1458.83	2	1458.83	0.0006	0	30.16	0.0041	K	MVSGFIPLKPTVK	M
8	gi|377656551	Chain A, Alpha-2 Macroglobulin	1638	160691	109	81	65	50	51.3	642	1	1	1	731.307	1460.6	2	1460.6	0.0034	0	61.37	8e-06	K	HYDGSYSTFGER	Y
8	gi|377656551	Chain A, Alpha-2 Macroglobulin	1638	160691	109	81	65	50	51.3	650	1	1	1	733.911	1465.81	2	1465.8	0.0027	1	16.66	0.056	K	SIYKPGQTVKFR	V
8	gi|377656551	Chain A, Alpha-2 Macroglobulin	1638	160691	109	81	65	50	51.3	676	1	1	1	745.91	1489.81	2	1489.81	-0.0012	1	30.41	0.0085	K	ATVLNYLPKCIR	V
8	gi|377656551	Chain A, Alpha-2 Macroglobulin	1638	160691	109	81	65	50	51.3	679	1	1	1	746.332	1490.65	2	1490.64	0.0063	0	55.42	0.00016	K	DMYSFLEDMGLK	A
8	gi|377656551	Chain A, Alpha-2 Macroglobulin	1638	160691	109	81	65	50	51.3	681	1	1	1	746.404	1490.79	2	1490.79	0.0051	0	65.51	1.9e-06	R	NQGNTWLTAFVLK	T
8	gi|377656551	Chain A, Alpha-2 Macroglobulin	1638	160691	109	81	65	50	51.3	700	1	1	1	751.915	1501.81	2	1501.83	-0.0178	0	9.85	0.6	K	MVSGFIPLKPTVK	M
8	gi|377656551	Chain A, Alpha-2 Macroglobulin	1638	160691	109	81	65	50	51.3	711	1	1	1	755.412	1508.81	2	1508.81	0.0003	1	13.86	0.59	K	SIYKPGQTVKFR	V
8	gi|377656551	Chain A, Alpha-2 Macroglobulin	1638	160691	109	81	65	50	51.3	718	1	1	1	757.391	1512.77	2	1512.77	0	1	63.94	4.6e-05	K	SKAIGYLNTGYQR	Q
8	gi|377656551	Chain A, Alpha-2 Macroglobulin	1638	160691	109	81	65	50	51.3	740	1	1	1	767.411	1532.81	2	1532.81	-0.0053	1	14.21	0.082	K	ATVLNYLPKCIR	V
8	gi|377656551	Chain A, Alpha-2 Macroglobulin	1638	160691	109	81	65	50	51.3	743	1	1	1	767.905	1533.8	2	1533.79	0.0019	0	25.54	0.0072	R	NQGNTWLTAFVLK	T
8	gi|377656551	Chain A, Alpha-2 Macroglobulin	1638	160691	109	81	65	50	51.3	761	1	1	1	515.938	1544.79	3	1544.79	-0.0013	0	56.4	1.6e-05	R	LVHVEEPHTETVR	K
8	gi|377656551	Chain A, Alpha-2 Macroglobulin	1638	160691	109	81	65	50	51.3	762	1	1	1	773.407	1544.8	2	1544.79	0.0037	0	20.53	0.047	R	LVHVEEPHTETVR	K
8	gi|377656551	Chain A, Alpha-2 Macroglobulin	1638	160691	109	81	65	50	51.3	790	1	1	1	783.419	1564.82	2	1564.82	-0.0007	0	62.39	3.3e-06	K	ALLAYAFALAGNQDK	R
8	gi|377656551	Chain A, Alpha-2 Macroglobulin	1638	160691	109	81	65	50	51.3	824	1	1	1	794.908	1587.8	2	1587.8	0.0005	0	28.65	0.0082	R	LVHVEEPHTETVR	K
8	gi|377656551	Chain A, Alpha-2 Macroglobulin	1638	160691	109	81	65	50	51.3	825	1	1	1	530.274	1587.8	3	1587.8	0.0008	0	47.52	5.7e-05	R	LVHVEEPHTETVR	K
8	gi|377656551	Chain A, Alpha-2 Macroglobulin	1638	160691	109	81	65	50	51.3	838	1	1	1	800.412	1598.81	2	1598.81	0.0004	1	34.31	0.0023	R	TGTHGLLVKQEDMK	G
8	gi|377656551	Chain A, Alpha-2 Macroglobulin	1638	160691	109	81	65	50	51.3	848	1	1	1	802.925	1603.84	2	1603.84	0	0	52.49	8.4e-05	R	IAQWQSFQLEGGLK	Q
8	gi|377656551	Chain A, Alpha-2 Macroglobulin	1638	160691	109	81	65	50	51.3	853	1	1	1	804.913	1607.81	2	1607.83	-0.0189	0	53.86	5.8e-05	K	ALLAYAFALAGNQDK	R
8	gi|377656551	Chain A, Alpha-2 Macroglobulin	1638	160691	109	81	65	50	51.3	855	1	1	1	804.923	1607.83	2	1607.83	0.0007	0	64.74	7.1e-06	K	ALLAYAFALAGNQDK	R
8	gi|377656551	Chain A, Alpha-2 Macroglobulin	1638	160691	109	81	65	50	51.3	868	1	1	1	809.428	1616.84	2	1616.84	-0.0005	0	60.91	3.3e-06	R	TEVSSNHVLIYLDK	V
8	gi|377656551	Chain A, Alpha-2 Macroglobulin	1638	160691	109	81	65	50	51.3	917	1	1	1	824.429	1646.84	2	1646.84	0.001	0	34.46	0.0037	R	IAQWQSFQLEGGLK	Q
8	gi|377656551	Chain A, Alpha-2 Macroglobulin	1638	160691	109	81	65	50	51.3	932	1	1	1	830.93	1659.85	2	1659.85	-0.0015	0	30.92	0.0084	R	TEVSSNHVLIYLDK	V
8	gi|377656551	Chain A, Alpha-2 Macroglobulin	1638	160691	109	81	65	50	51.3	935	2	1	1	555.28	1662.82	3	1662.82	-0.0051	0	1.43	1	K	DNSVHWERPQKPK	A
8	gi|377656551	Chain A, Alpha-2 Macroglobulin	1638	160691	109	81	65	50	51.3	952	1	1	1	558.291	1671.85	3	1671.85	-0.0009	0	17.23	0.024	R	TEHPFTVEEFVLPK	F
8	gi|377656551	Chain A, Alpha-2 Macroglobulin	1638	160691	109	81	65	50	51.3	953	1	1	1	836.934	1671.85	2	1671.85	0.0034	0	30.5	0.0045	R	TEHPFTVEEFVLPK	F
8	gi|377656551	Chain A, Alpha-2 Macroglobulin	1638	160691	109	81	65	50	51.3	1012	1	1	1	858.435	1714.86	2	1714.86	-0.0004	0	19.38	0.046	R	TEHPFTVEEFVLPK	F
8	gi|377656551	Chain A, Alpha-2 Macroglobulin	1638	160691	109	81	65	50	51.3	1071	1	1	1	882.971	1763.93	2	1763.93	-0.0036	1	51.84	0.00022	K	ALLAYAFALAGNQDKR	K
8	gi|377656551	Chain A, Alpha-2 Macroglobulin	1638	160691	109	81	65	50	51.3	1085	1	1	1	890.508	1779	2	1779	-0.0025	0	51.35	4.8e-05	K	DTVIKPLLVEPEGLEK	E
8	gi|377656551	Chain A, Alpha-2 Macroglobulin	1638	160691	109	81	65	50	51.3	1127	1	1	1	904.475	1806.94	2	1806.94	-0.0024	1	17.5	0.037	K	ALLAYAFALAGNQDKR	K
8	gi|377656551	Chain A, Alpha-2 Macroglobulin	1638	160691	109	81	65	50	51.3	1128	1	1	1	904.503	1806.99	2	1806.99	0.0027	1	27.21	0.0028	R	GEAFTLKATVLNYLPK	C
8	gi|377656551	Chain A, Alpha-2 Macroglobulin	1638	160691	109	81	65	50	51.3	1148	1	1	1	912.013	1822.01	2	1822.01	0.0023	0	59.13	0.0017	K	DTVIKPLLVEPEGLEK	E
8	gi|377656551	Chain A, Alpha-2 Macroglobulin	1638	160691	109	81	65	50	51.3	1163	1	1	1	612.316	1833.93	3	1833.92	0.0031	1	6.76	0.23	K	KDNSVHWERPQKPK	A
8	gi|377656551	Chain A, Alpha-2 Macroglobulin	1638	160691	109	81	65	50	51.3	1185	1	1	1	923.019	1844.02	2	1844.03	-0.0069	0	66.36	1.4e-06	R	LLIYAVLPTGDVIGDSAK	Y
8	gi|377656551	Chain A, Alpha-2 Macroglobulin	1638	160691	109	81	65	50	51.3	1190	1	1	1	924.945	1847.88	2	1847.87	0.0024	0	54.47	2.4e-05	K	QFSFPLSSEPFQGSYK	V
8	gi|377656551	Chain A, Alpha-2 Macroglobulin	1638	160691	109	81	65	50	51.3	1193	1	1	1	926.005	1849.99	2	1849.99	0.0007	1	40.45	0.00039	R	GEAFTLKATVLNYLPK	C
8	gi|377656551	Chain A, Alpha-2 Macroglobulin	1638	160691	109	81	65	50	51.3	1218	1	1	1	933.515	1865.02	2	1865.01	0.0005	0	35.31	0.00068	K	DTVIKPLLVEPEGLEK	E
8	gi|377656551	Chain A, Alpha-2 Macroglobulin	1638	160691	109	81	65	50	51.3	1254	1	1	1	942.529	1883.04	2	1883.04	0.0026	0	50.24	3e-05	R	VSVQLEASPAFLAVPVEK	E
8	gi|377656551	Chain A, Alpha-2 Macroglobulin	1638	160691	109	81	65	50	51.3	1258	1	1	1	944.52	1887.03	2	1887.04	-0.0089	0	50.45	0.0029	R	LLIYAVLPTGDVIGDSAK	Y
8	gi|377656551	Chain A, Alpha-2 Macroglobulin	1638	160691	109	81	65	50	51.3	1333	1	1	1	976.057	1950.1	2	1950.1	-0.0047	1	43.93	0.00029	R	KDTVIKPLLVEPEGLEK	E
8	gi|377656551	Chain A, Alpha-2 Macroglobulin	1638	160691	109	81	65	50	51.3	1334	1	1	1	651.043	1950.11	3	1950.1	0.0035	1	25.44	0.0041	R	KDTVIKPLLVEPEGLEK	E
8	gi|377656551	Chain A, Alpha-2 Macroglobulin	1638	160691	109	81	65	50	51.3	1362	1	1	1	990.536	1979.06	2	1979.06	-0.0022	1	23.94	0.015	K	GHFSISIPVKSDIAPVAR	L
8	gi|377656551	Chain A, Alpha-2 Macroglobulin	1638	160691	109	81	65	50	51.3	1372	1	1	1	663.706	1988.1	3	1988.1	0.0014	1	11.03	0.21	K	MVSGFIPLKPTVKMLER	S
8	gi|377656551	Chain A, Alpha-2 Macroglobulin	1638	160691	109	81	65	50	51.3	1396	1	1	1	1016.56	2031.1	2	2031.1	0.0009	1	16.75	0.15	K	MVSGFIPLKPTVKMLER	S
8	gi|377656551	Chain A, Alpha-2 Macroglobulin	1638	160691	109	81	65	50	51.3	1397	2	1	1	1016.56	2031.1	2	2031.1	0.0037	1	1.97	1.1	K	MVSGFIPLKPTVKMLER	S
8	gi|377656551	Chain A, Alpha-2 Macroglobulin	1638	160691	109	81	65	50	51.3	1398	1	1	1	678.043	2031.11	3	2031.1	0.0051	1	7.51	0.35	K	MVSGFIPLKPTVKMLER	S
8	gi|377656551	Chain A, Alpha-2 Macroglobulin	1638	160691	109	81	65	50	51.3	1411	1	1	1	1023.03	2044.05	2	2044.05	0.0044	0	54.12	1.1e-05	R	AFQPFFVELTMPYSVIR	G
8	gi|377656551	Chain A, Alpha-2 Macroglobulin	1638	160691	109	81	65	50	51.3	1414	1	1	1	1023.05	2044.09	2	2044.09	0.0022	0	25.29	0.0042	R	LLLQQVSLPELPGEYSMK	V
8	gi|377656551	Chain A, Alpha-2 Macroglobulin	1638	160691	109	81	65	50	51.3	1418	1	1	1	683.691	2048.05	3	2048.04	0.0072	0	64.18	9.6e-07	K	VDLSFSPSQSLPASHAHLR	V
8	gi|377656551	Chain A, Alpha-2 Macroglobulin	1638	160691	109	81	65	50	51.3	1443	1	1	1	691.982	2072.93	3	2072.92	0.0024	0	36.84	0.0012	K	MCPQLQQYEMHGPEGLR	V
8	gi|377656551	Chain A, Alpha-2 Macroglobulin	1638	160691	109	81	65	50	51.3	1444	1	1	1	1038.06	2074.11	2	2074.11	-0.0017	1	8.52	0.3	K	MVSGFIPLKPTVKMLER	S
8	gi|377656551	Chain A, Alpha-2 Macroglobulin	1638	160691	109	81	65	50	51.3	1457	1	1	1	1044.54	2087.06	2	2087.05	0.003	0	45.82	8.4e-05	R	AFQPFFVELTMPYSVIR	G
8	gi|377656551	Chain A, Alpha-2 Macroglobulin	1638	160691	109	81	65	50	51.3	1463	1	1	1	1044.56	2087.1	2	2087.1	0.0042	0	76.35	1.5e-06	R	LLLQQVSLPELPGEYSMK	V
8	gi|377656551	Chain A, Alpha-2 Macroglobulin	1638	160691	109	81	65	50	51.3	1481	1	1	1	702.6	2104.78	3	2104.77	0.0049	0	15.18	0.038	K	YSDASDCHGEDSQAFCEK	F
8	gi|377656551	Chain A, Alpha-2 Macroglobulin	1638	160691	109	81	65	50	51.3	1483	1	1	1	703.321	2106.94	3	2106.94	0.0017	1	27.85	0.0024	R	QLNYKHYDGSYSTFGER	Y
8	gi|377656551	Chain A, Alpha-2 Macroglobulin	1638	160691	109	81	65	50	51.3	1491	1	1	1	1058.98	2115.94	2	2115.93	0.0124	0	47.42	4.2e-05	K	MCPQLQQYEMHGPEGLR	V
8	gi|377656551	Chain A, Alpha-2 Macroglobulin	1638	160691	109	81	65	50	51.3	1518	1	1	1	1070.49	2138.97	2	2138.97	0.0016	1	15.28	0.045	K	DMYSFLEDMGLKAFTNSK	I
8	gi|377656551	Chain A, Alpha-2 Macroglobulin	1638	160691	109	81	65	50	51.3	1542	1	1	1	721.731	2162.17	3	2162.17	-0.0009	0	24.5	0.014	K	VSNQTLSLFFTVLQDVPVR	D
8	gi|377656551	Chain A, Alpha-2 Macroglobulin	1638	160691	109	81	65	50	51.3	1543	1	1	1	1082.1	2162.18	2	2162.17	0.0031	0	52.77	4.2e-05	K	VSNQTLSLFFTVLQDVPVR	D
8	gi|377656551	Chain A, Alpha-2 Macroglobulin	1638	160691	109	81	65	50	51.3	1560	1	1	1	1091.99	2181.97	2	2181.97	-0.0002	1	14.92	0.04	K	DMYSFLEDMGLKAFTNSK	I
8	gi|377656551	Chain A, Alpha-2 Macroglobulin	1638	160691	109	81	65	50	51.3	1580	1	1	1	737.055	2208.14	3	2208.14	-0.0002	1	18.27	0.019	R	NQGNTWLTAFVLKTFAQAR	A
8	gi|377656551	Chain A, Alpha-2 Macroglobulin	1638	160691	109	81	65	50	51.3	1733	1	1	1	796.404	2386.19	3	2386.19	0.001	0	16.99	0.025	K	QQNAQGGFSSTQDTVVALHALSK	Y
8	gi|377656551	Chain A, Alpha-2 Macroglobulin	1638	160691	109	81	65	50	51.3	1738	1	1	1	1199.08	2396.14	2	2396.14	-0.0001	0	36.75	0.00037	K	ETTFNSLLCPSGGEVSEELSLK	L
8	gi|377656551	Chain A, Alpha-2 Macroglobulin	1638	160691	109	81	65	50	51.3	1767	1	1	1	818.061	2451.16	3	2451.16	0.0037	2	3.88	0.97	K	DMYSFLEDMGLKAFTNSKIR	K
8	gi|377656551	Chain A, Alpha-2 Macroglobulin	1638	160691	109	81	65	50	51.3	1777	1	1	1	824.067	2469.18	3	2469.17	0.0062	1	54.51	2.1e-05	R	KPKMCPQLQQYEMHGPEGLR	V
8	gi|377656551	Chain A, Alpha-2 Macroglobulin	1638	160691	109	81	65	50	51.3	1778	1	1	1	618.304	2469.19	4	2469.17	0.015	1	43.95	7.6e-05	R	KPKMCPQLQQYEMHGPEGLR	V
8	gi|377656551	Chain A, Alpha-2 Macroglobulin	1638	160691	109	81	65	50	51.3	1782	1	1	1	825.745	2474.21	3	2474.22	-0.0032	0	15.28	0.6	R	SLFTDLEAENDVLHCVAFAVPK	S
8	gi|377656551	Chain A, Alpha-2 Macroglobulin	1638	160691	109	81	65	50	51.3	1783	1	1	1	1238.12	2474.22	2	2474.22	0.0005	0	8.69	0.15	R	SLFTDLEAENDVLHCVAFAVPK	S
8	gi|377656551	Chain A, Alpha-2 Macroglobulin	1638	160691	109	81	65	50	51.3	1806	1	1	1	838.4	2512.18	3	2512.18	-0.0001	1	41.38	0.00013	R	KPKMCPQLQQYEMHGPEGLR	V
8	gi|377656551	Chain A, Alpha-2 Macroglobulin	1638	160691	109	81	65	50	51.3	1843	1	1	1	848.783	2543.33	3	2543.33	-0.0027	0	32.92	0.0013	-	SVSGKPQYMVLVPSLLHTETTEK	G
8	gi|377656551	Chain A, Alpha-2 Macroglobulin	1638	160691	109	81	65	50	51.3	1880	1	1	1	859.137	2574.39	3	2574.39	-0.0028	1	21.32	0.34	R	SASNMAIVDVKMVSGFIPLKPTVK	M
8	gi|377656551	Chain A, Alpha-2 Macroglobulin	1638	160691	109	81	65	50	51.3	1889	1	1	1	863.118	2586.33	3	2586.34	-0.0048	0	20.91	0.014	-	SVSGKPQYMVLVPSLLHTETTEK	G
8	gi|377656551	Chain A, Alpha-2 Macroglobulin	1638	160691	109	81	65	50	51.3	1890	1	1	1	863.118	2586.33	3	2586.34	-0.0033	0	20.16	0.065	-	SVSGKPQYMVLVPSLLHTETTEK	G
8	gi|377656551	Chain A, Alpha-2 Macroglobulin	1638	160691	109	81	65	50	51.3	1931	1	1	1	877.455	2629.34	3	2629.34	0.0004	0	7.39	0.2	-	SVSGKPQYMVLVPSLLHTETTEK	G
8	gi|377656551	Chain A, Alpha-2 Macroglobulin	1638	160691	109	81	65	50	51.3	2002	1	1	1	915.151	2742.43	3	2742.43	0.0034	1	37.42	0.0004	R	TEHPFTVEEFVLPKFEVQVTVPK	I
8	gi|377656551	Chain A, Alpha-2 Macroglobulin	1638	160691	109	81	65	50	51.3	2035	1	1	1	1405.72	2809.43	2	2809.44	-0.01	0	33.94	0.0046	R	VVSMDENFHPLNELIPLVYIQDPK	G
8	gi|377656551	Chain A, Alpha-2 Macroglobulin	1638	160691	109	81	65	50	51.3	2069	1	1	1	1427.22	2852.43	2	2852.44	-0.0114	0	11.23	0.089	R	VVSMDENFHPLNELIPLVYIQDPK	G
8	gi|377656551	Chain A, Alpha-2 Macroglobulin	1638	160691	109	81	65	50	51.3	2070	1	1	1	951.82	2852.44	3	2852.44	-0.0049	0	25.35	0.0048	R	VVSMDENFHPLNELIPLVYIQDPK	G
8	gi|377656551	Chain A, Alpha-2 Macroglobulin	1638	160691	109	81	65	50	51.3	2103	1	1	1	973.18	2916.52	3	2916.52	0.0031	0	54.89	1.7e-05	R	AVDQSVLLMKPDAELSASSVYNLLPEK	D
8	gi|377656551	Chain A, Alpha-2 Macroglobulin	1638	160691	109	81	65	50	51.3	2121	1	1	1	987.517	2959.53	3	2959.52	0.0074	0	45.2	0.041	R	AVDQSVLLMKPDAELSASSVYNLLPEK	D
8	gi|377656551	Chain A, Alpha-2 Macroglobulin	1638	160691	109	81	65	50	51.3	2191	1	1	1	1060.88	3179.61	3	3179.61	0.0042	1	17.85	0.18	R	VVSMDENFHPLNELIPLVYIQDPKGNR	I
8	gi|377656551	Chain A, Alpha-2 Macroglobulin	1638	160691	109	81	65	50	51.3	2209	1	1	1	1075.21	3222.62	3	3222.61	0.0043	1	23.18	0.0067	R	VVSMDENFHPLNELIPLVYIQDPKGNR	I
8	gi|377656551	Chain A, Alpha-2 Macroglobulin	1638	160691	109	81	65	50	51.3	2229	1	1	1	835.378	3337.48	4	3337.48	0.0034	0	50.36	6.5e-05	R	SPCYGYQWVSEEHEEAHHTAYLVFSPSK	S
9	gi|224053	macroglobulin alpha2	1622	160704	107	79	63	48	49.1	106	1	0	1	484.781	967.546	2	967.545	0.0014	0	12.68	0.22	R	TGTHGLLVK	Q
9	gi|224053	macroglobulin alpha2	1622	160704	107	79	63	48	49.1	139	3	0	1	509.797	1017.58	2	1017.59	-0.0064	0	10.56	0.74	K	ATVLNYLPK	C
9	gi|224053	macroglobulin alpha2	1622	160704	107	79	63	48	49.1	160	1	0	1	523.8	1045.58	2	1045.58	0.0038	0	11.2	0.23	K	FEVQVTVPK	I
9	gi|224053	macroglobulin alpha2	1622	160704	107	79	63	48	49.1	188	1	0	1	540.328	1078.64	2	1078.64	0.0022	1	12.48	0.4	R	TITKLSFVK	V
9	gi|224053	macroglobulin alpha2	1622	160704	107	79	63	48	49.1	190	1	0	1	542.811	1083.61	2	1083.61	-0.0002	0	23.03	0.17	K	GHFSISIPVK	S
9	gi|224053	macroglobulin alpha2	1622	160704	107	79	63	48	49.1	206	1	0	1	553.329	1104.64	2	1104.64	0.0039	2	13.41	0.24	K	TKVFQLKR	K
9	gi|224053	macroglobulin alpha2	1622	160704	107	79	63	48	49.1	211	1	0	1	558.796	1115.58	2	1115.6	-0.0199	0	34.54	0.0059	R	QTVSWAVTPK	S
9	gi|224053	macroglobulin alpha2	1622	160704	107	79	63	48	49.1	229	1	0	1	564.316	1126.62	2	1126.61	0.0038	0	22.43	0.11	K	GHFSISIPVK	S
9	gi|224053	macroglobulin alpha2	1622	160704	107	79	63	48	49.1	238	1	0	1	567.797	1133.58	2	1133.58	0.0036	0	30.33	0.0051	R	SASNMAIVDVK	M
9	gi|224053	macroglobulin alpha2	1622	160704	107	79	63	48	49.1	251	1	0	1	574.814	1147.61	2	1147.61	-0.001	0	30.32	0.013	R	QGIPFFGQVR	L
9	gi|224053	macroglobulin alpha2	1622	160704	107	79	63	48	49.1	320	1	0	1	605.826	1209.64	2	1209.64	0.0029	0	48.07	0.00018	K	LPPNVVEESAR	A
9	gi|224053	macroglobulin alpha2	1622	160704	107	79	63	48	49.1	386	1	0	1	628.326	1254.64	2	1254.64	0.0014	0	58.02	5e-05	K	AIGYLNTGYQR	Q
9	gi|224053	macroglobulin alpha2	1622	160704	107	79	63	48	49.1	391	1	0	1	630.292	1258.57	2	1258.57	0.0046	0	89.12	1e-07	R	VGFYESDVMGR	G
9	gi|224053	macroglobulin alpha2	1622	160704	107	79	63	48	49.1	406	1	0	1	636.841	1271.67	2	1271.67	0.0026	0	71.15	7.5e-06	R	VTAAPQSVCALR	A
9	gi|224053	macroglobulin alpha2	1622	160704	107	79	63	48	49.1	424	1	0	1	640.374	1278.73	2	1278.73	0.0029	1	14.05	0.55	R	LVDGKGVPIPNK	V
9	gi|224053	macroglobulin alpha2	1622	160704	107	79	63	48	49.1	449	1	0	1	649.828	1297.64	2	1297.64	-0.0008	0	32.32	0.026	K	AIGYLNTGYQR	Q
9	gi|224053	macroglobulin alpha2	1622	160704	107	79	63	48	49.1	545	1	0	1	689.368	1376.72	2	1376.72	0.0006	1	54.59	0.0038	K	LSFVKVDSHFR	Q
9	gi|224053	macroglobulin alpha2	1622	160704	107	79	63	48	49.1	562	1	0	1	697.845	1393.68	2	1393.67	0.0029	0	49.43	0.00028	K	NEDSLVFVQTDK	S
9	gi|224053	macroglobulin alpha2	1622	160704	107	79	63	48	49.1	563	1	0	1	698.429	1394.84	2	1394.84	0.0031	1	43.75	0.027	K	GVPIPNKVIFIR	G
9	gi|224053	macroglobulin alpha2	1622	160704	107	79	63	48	49.1	566	1	0	1	701.385	1400.76	2	1400.75	0.005	1	14.8	0.11	K	EVLKSLNEEAVK	K
9	gi|224053	macroglobulin alpha2	1622	160704	107	79	63	48	49.1	590	1	0	1	709.804	1417.59	2	1417.59	0.0046	0	63.5	8.9e-06	K	HYDGSYSTFGER	Y
9	gi|224053	macroglobulin alpha2	1622	160704	107	79	63	48	49.1	593	1	0	1	710.389	1418.76	2	1418.76	0.0013	1	31.2	0.0059	K	KLSFYYLIMAK	G
9	gi|224053	macroglobulin alpha2	1622	160704	107	79	63	48	49.1	597	1	0	1	710.872	1419.73	2	1419.73	0.0027	1	31.39	0.014	K	LSFVKVDSHFR	Q
9	gi|224053	macroglobulin alpha2	1622	160704	107	79	63	48	49.1	616	1	0	1	719.933	1437.85	2	1437.85	0.0048	1	19.14	0.016	K	GVPIPNKVIFIR	G
9	gi|224053	macroglobulin alpha2	1622	160704	107	79	63	48	49.1	625	1	0	1	724.827	1447.64	2	1447.64	0.0023	0	57.89	2.7e-05	K	DMYSFLEDMGLK	A
9	gi|224053	macroglobulin alpha2	1622	160704	107	79	63	48	49.1	641	1	0	1	730.421	1458.83	2	1458.83	0.0006	0	30.16	0.0041	K	MVSGFIPLKPTVK	M
9	gi|224053	macroglobulin alpha2	1622	160704	107	79	63	48	49.1	642	1	0	1	731.307	1460.6	2	1460.6	0.0034	0	61.37	8e-06	K	HYDGSYSTFGER	Y
9	gi|224053	macroglobulin alpha2	1622	160704	107	79	63	48	49.1	650	1	0	1	733.911	1465.81	2	1465.8	0.0027	1	16.66	0.056	K	SIYKPGQTVKFR	V
9	gi|224053	macroglobulin alpha2	1622	160704	107	79	63	48	49.1	676	1	0	1	745.91	1489.81	2	1489.81	-0.0012	1	30.41	0.0085	K	ATVLNYLPKCIR	V
9	gi|224053	macroglobulin alpha2	1622	160704	107	79	63	48	49.1	679	1	0	1	746.332	1490.65	2	1490.64	0.0063	0	55.42	0.00016	K	DMYSFLEDMGLK	A
9	gi|224053	macroglobulin alpha2	1622	160704	107	79	63	48	49.1	681	1	0	1	746.404	1490.79	2	1490.79	0.0051	0	65.51	1.9e-06	R	NQGNTWLTAFVLK	T
9	gi|224053	macroglobulin alpha2	1622	160704	107	79	63	48	49.1	700	1	0	1	751.915	1501.81	2	1501.83	-0.0178	0	9.85	0.6	K	MVSGFIPLKPTVK	M
9	gi|224053	macroglobulin alpha2	1622	160704	107	79	63	48	49.1	711	1	0	1	755.412	1508.81	2	1508.81	0.0003	1	13.86	0.59	K	SIYKPGQTVKFR	V
9	gi|224053	macroglobulin alpha2	1622	160704	107	79	63	48	49.1	718	1	0	1	757.391	1512.77	2	1512.77	0	1	63.94	4.6e-05	K	SKAIGYLNTGYQR	Q
9	gi|224053	macroglobulin alpha2	1622	160704	107	79	63	48	49.1	740	1	0	1	767.411	1532.81	2	1532.81	-0.0053	1	14.21	0.082	K	ATVLNYLPKCIR	V
9	gi|224053	macroglobulin alpha2	1622	160704	107	79	63	48	49.1	743	1	0	1	767.905	1533.8	2	1533.79	0.0019	0	25.54	0.0072	R	NQGNTWLTAFVLK	T
9	gi|224053	macroglobulin alpha2	1622	160704	107	79	63	48	49.1	761	1	0	1	515.938	1544.79	3	1544.79	-0.0013	0	56.4	1.6e-05	R	LVHVEEPHTETVR	K
9	gi|224053	macroglobulin alpha2	1622	160704	107	79	63	48	49.1	762	1	0	1	773.407	1544.8	2	1544.79	0.0037	0	20.53	0.047	R	LVHVEEPHTETVR	K
9	gi|224053	macroglobulin alpha2	1622	160704	107	79	63	48	49.1	790	1	0	1	783.419	1564.82	2	1564.82	-0.0007	0	62.39	3.3e-06	K	ALLAYAFALAGNQDK	R
9	gi|224053	macroglobulin alpha2	1622	160704	107	79	63	48	49.1	824	1	0	1	794.908	1587.8	2	1587.8	0.0005	0	28.65	0.0082	R	LVHVEEPHTETVR	K
9	gi|224053	macroglobulin alpha2	1622	160704	107	79	63	48	49.1	825	1	0	1	530.274	1587.8	3	1587.8	0.0008	0	47.52	5.7e-05	R	LVHVEEPHTETVR	K
9	gi|224053	macroglobulin alpha2	1622	160704	107	79	63	48	49.1	838	1	0	1	800.412	1598.81	2	1598.81	0.0004	1	34.31	0.0023	R	TGTHGLLVKQEDMK	G
9	gi|224053	macroglobulin alpha2	1622	160704	107	79	63	48	49.1	848	1	0	1	802.925	1603.84	2	1603.84	0	0	52.49	8.4e-05	R	IAQWQSFQLEGGLK	Q
9	gi|224053	macroglobulin alpha2	1622	160704	107	79	63	48	49.1	853	1	0	1	804.913	1607.81	2	1607.83	-0.0189	0	53.86	5.8e-05	K	ALLAYAFALAGNQDK	R
9	gi|224053	macroglobulin alpha2	1622	160704	107	79	63	48	49.1	855	1	0	1	804.923	1607.83	2	1607.83	0.0007	0	64.74	7.1e-06	K	ALLAYAFALAGNQDK	R
9	gi|224053	macroglobulin alpha2	1622	160704	107	79	63	48	49.1	868	1	0	1	809.428	1616.84	2	1616.84	-0.0005	0	60.91	3.3e-06	R	TEVSSNHVLIYLDK	V
9	gi|224053	macroglobulin alpha2	1622	160704	107	79	63	48	49.1	917	1	0	1	824.429	1646.84	2	1646.84	0.001	0	34.46	0.0037	R	IAQWQSFQLEGGLK	Q
9	gi|224053	macroglobulin alpha2	1622	160704	107	79	63	48	49.1	932	1	0	1	830.93	1659.85	2	1659.85	-0.0015	0	30.92	0.0084	R	TEVSSNHVLIYLDK	V
9	gi|224053	macroglobulin alpha2	1622	160704	107	79	63	48	49.1	935	2	0	1	555.28	1662.82	3	1662.82	-0.0051	0	1.43	1	K	DNSVHWERPQKPK	A
9	gi|224053	macroglobulin alpha2	1622	160704	107	79	63	48	49.1	952	1	0	1	558.291	1671.85	3	1671.85	-0.0009	0	17.23	0.024	R	TEHPFTVEEFVLPK	F
9	gi|224053	macroglobulin alpha2	1622	160704	107	79	63	48	49.1	953	1	0	1	836.934	1671.85	2	1671.85	0.0034	0	30.5	0.0045	R	TEHPFTVEEFVLPK	F
9	gi|224053	macroglobulin alpha2	1622	160704	107	79	63	48	49.1	1012	1	0	1	858.435	1714.86	2	1714.86	-0.0004	0	19.38	0.046	R	TEHPFTVEEFVLPK	F
9	gi|224053	macroglobulin alpha2	1622	160704	107	79	63	48	49.1	1071	1	0	1	882.971	1763.93	2	1763.93	-0.0036	1	51.84	0.00022	K	ALLAYAFALAGNQDKR	K
9	gi|224053	macroglobulin alpha2	1622	160704	107	79	63	48	49.1	1085	1	0	1	890.508	1779	2	1779	-0.0025	0	51.35	4.8e-05	K	DTVIKPLLVEPEGLEK	E
9	gi|224053	macroglobulin alpha2	1622	160704	107	79	63	48	49.1	1127	1	0	1	904.475	1806.94	2	1806.94	-0.0024	1	17.5	0.037	K	ALLAYAFALAGNQDKR	K
9	gi|224053	macroglobulin alpha2	1622	160704	107	79	63	48	49.1	1128	1	0	1	904.503	1806.99	2	1806.99	0.0027	1	27.21	0.0028	R	GEAFTLKATVLNYLPK	C
9	gi|224053	macroglobulin alpha2	1622	160704	107	79	63	48	49.1	1148	1	0	1	912.013	1822.01	2	1822.01	0.0023	0	59.13	0.0017	K	DTVIKPLLVEPEGLEK	E
9	gi|224053	macroglobulin alpha2	1622	160704	107	79	63	48	49.1	1163	1	0	1	612.316	1833.93	3	1833.92	0.0031	1	6.76	0.23	K	KDNSVHWERPQKPK	A
9	gi|224053	macroglobulin alpha2	1622	160704	107	79	63	48	49.1	1185	1	0	1	923.019	1844.02	2	1844.03	-0.0069	0	66.36	1.4e-06	R	LLIYAVLPTGDVIGDSAK	Y
9	gi|224053	macroglobulin alpha2	1622	160704	107	79	63	48	49.1	1190	1	0	1	924.945	1847.88	2	1847.87	0.0024	0	54.47	2.4e-05	K	QFSFPLSSEPFQGSYK	V
9	gi|224053	macroglobulin alpha2	1622	160704	107	79	63	48	49.1	1193	1	0	1	926.005	1849.99	2	1849.99	0.0007	1	40.45	0.00039	R	GEAFTLKATVLNYLPK	C
9	gi|224053	macroglobulin alpha2	1622	160704	107	79	63	48	49.1	1218	1	0	1	933.515	1865.02	2	1865.01	0.0005	0	35.31	0.00068	K	DTVIKPLLVEPEGLEK	E
9	gi|224053	macroglobulin alpha2	1622	160704	107	79	63	48	49.1	1254	1	0	1	942.529	1883.04	2	1883.04	0.0026	0	50.24	3e-05	R	VSVQLEASPAFLAVPVEK	E
9	gi|224053	macroglobulin alpha2	1622	160704	107	79	63	48	49.1	1258	1	0	1	944.52	1887.03	2	1887.04	-0.0089	0	50.45	0.0029	R	LLIYAVLPTGDVIGDSAK	Y
9	gi|224053	macroglobulin alpha2	1622	160704	107	79	63	48	49.1	1333	1	0	1	976.057	1950.1	2	1950.1	-0.0047	1	43.93	0.00029	R	KDTVIKPLLVEPEGLEK	E
9	gi|224053	macroglobulin alpha2	1622	160704	107	79	63	48	49.1	1334	1	0	1	651.043	1950.11	3	1950.1	0.0035	1	25.44	0.0041	R	KDTVIKPLLVEPEGLEK	E
9	gi|224053	macroglobulin alpha2	1622	160704	107	79	63	48	49.1	1362	1	0	1	990.536	1979.06	2	1979.06	-0.0022	1	23.94	0.015	K	GHFSISIPVKSDIAPVAR	L
9	gi|224053	macroglobulin alpha2	1622	160704	107	79	63	48	49.1	1372	1	0	1	663.706	1988.1	3	1988.1	0.0014	1	11.03	0.21	K	MVSGFIPLKPTVKMLER	S
9	gi|224053	macroglobulin alpha2	1622	160704	107	79	63	48	49.1	1396	1	0	1	1016.56	2031.1	2	2031.1	0.0009	1	16.75	0.15	K	MVSGFIPLKPTVKMLER	S
9	gi|224053	macroglobulin alpha2	1622	160704	107	79	63	48	49.1	1397	2	0	1	1016.56	2031.1	2	2031.1	0.0037	1	1.97	1.1	K	MVSGFIPLKPTVKMLER	S
9	gi|224053	macroglobulin alpha2	1622	160704	107	79	63	48	49.1	1398	1	0	1	678.043	2031.11	3	2031.1	0.0051	1	7.51	0.35	K	MVSGFIPLKPTVKMLER	S
9	gi|224053	macroglobulin alpha2	1622	160704	107	79	63	48	49.1	1411	1	0	1	1023.03	2044.05	2	2044.05	0.0044	0	54.12	1.1e-05	R	AFQPFFVELTMPYSVIR	G
9	gi|224053	macroglobulin alpha2	1622	160704	107	79	63	48	49.1	1414	1	0	1	1023.05	2044.09	2	2044.09	0.0022	0	25.29	0.0042	R	LLLQQVSLPELPGEYSMK	V
9	gi|224053	macroglobulin alpha2	1622	160704	107	79	63	48	49.1	1418	1	0	1	683.691	2048.05	3	2048.04	0.0072	0	64.18	9.6e-07	K	VDLSFSPSQSLPASHAHLR	V
9	gi|224053	macroglobulin alpha2	1622	160704	107	79	63	48	49.1	1443	1	0	1	691.982	2072.93	3	2072.92	0.0024	0	36.84	0.0012	K	MCPQLQQYEMHGPEGLR	V
9	gi|224053	macroglobulin alpha2	1622	160704	107	79	63	48	49.1	1444	1	0	1	1038.06	2074.11	2	2074.11	-0.0017	1	8.52	0.3	K	MVSGFIPLKPTVKMLER	S
9	gi|224053	macroglobulin alpha2	1622	160704	107	79	63	48	49.1	1457	1	0	1	1044.54	2087.06	2	2087.05	0.003	0	45.82	8.4e-05	R	AFQPFFVELTMPYSVIR	G
9	gi|224053	macroglobulin alpha2	1622	160704	107	79	63	48	49.1	1463	1	0	1	1044.56	2087.1	2	2087.1	0.0042	0	76.35	1.5e-06	R	LLLQQVSLPELPGEYSMK	V
9	gi|224053	macroglobulin alpha2	1622	160704	107	79	63	48	49.1	1481	1	0	1	702.6	2104.78	3	2104.77	0.0049	0	15.18	0.038	K	YSDASDCHGEDSQAFCEK	F
9	gi|224053	macroglobulin alpha2	1622	160704	107	79	63	48	49.1	1483	1	0	1	703.321	2106.94	3	2106.94	0.0017	1	27.85	0.0024	R	QLNYKHYDGSYSTFGER	Y
9	gi|224053	macroglobulin alpha2	1622	160704	107	79	63	48	49.1	1491	1	0	1	1058.98	2115.94	2	2115.93	0.0124	0	47.42	4.2e-05	K	MCPQLQQYEMHGPEGLR	V
9	gi|224053	macroglobulin alpha2	1622	160704	107	79	63	48	49.1	1518	1	0	1	1070.49	2138.97	2	2138.97	0.0016	1	15.28	0.045	K	DMYSFLEDMGLKAFTNSK	I
9	gi|224053	macroglobulin alpha2	1622	160704	107	79	63	48	49.1	1542	1	0	1	721.731	2162.17	3	2162.17	-0.0009	0	24.5	0.014	K	VSNQTLSLFFTVLQDVPVR	D
9	gi|224053	macroglobulin alpha2	1622	160704	107	79	63	48	49.1	1543	1	0	1	1082.1	2162.18	2	2162.17	0.0031	0	52.77	4.2e-05	K	VSNQTLSLFFTVLQDVPVR	D
9	gi|224053	macroglobulin alpha2	1622	160704	107	79	63	48	49.1	1560	1	0	1	1091.99	2181.97	2	2181.97	-0.0002	1	14.92	0.04	K	DMYSFLEDMGLKAFTNSK	I
9	gi|224053	macroglobulin alpha2	1622	160704	107	79	63	48	49.1	1580	1	0	1	737.055	2208.14	3	2208.14	-0.0002	1	18.27	0.019	R	NQGNTWLTAFVLKTFAQAR	A
9	gi|224053	macroglobulin alpha2	1622	160704	107	79	63	48	49.1	1738	1	0	1	1199.08	2396.14	2	2396.14	-0.0001	0	36.75	0.00037	K	ETTFNSLLCPSGGEVSEELSLK	L
9	gi|224053	macroglobulin alpha2	1622	160704	107	79	63	48	49.1	1767	1	0	1	818.061	2451.16	3	2451.16	0.0037	2	3.88	0.97	K	DMYSFLEDMGLKAFTNSKIR	K
9	gi|224053	macroglobulin alpha2	1622	160704	107	79	63	48	49.1	1777	1	0	1	824.067	2469.18	3	2469.17	0.0062	1	54.51	2.1e-05	R	KPKMCPQLQQYEMHGPEGLR	V
9	gi|224053	macroglobulin alpha2	1622	160704	107	79	63	48	49.1	1778	1	0	1	618.304	2469.19	4	2469.17	0.015	1	43.95	7.6e-05	R	KPKMCPQLQQYEMHGPEGLR	V
9	gi|224053	macroglobulin alpha2	1622	160704	107	79	63	48	49.1	1782	1	0	1	825.745	2474.21	3	2474.22	-0.0032	0	15.28	0.6	R	SLFTDLEAENDVLHCVAFAVPK	S
9	gi|224053	macroglobulin alpha2	1622	160704	107	79	63	48	49.1	1783	1	0	1	1238.12	2474.22	2	2474.22	0.0005	0	8.69	0.15	R	SLFTDLEAENDVLHCVAFAVPK	S
9	gi|224053	macroglobulin alpha2	1622	160704	107	79	63	48	49.1	1806	1	0	1	838.4	2512.18	3	2512.18	-0.0001	1	41.38	0.00013	R	KPKMCPQLQQYEMHGPEGLR	V
9	gi|224053	macroglobulin alpha2	1622	160704	107	79	63	48	49.1	1843	1	0	1	848.783	2543.33	3	2543.33	-0.0027	0	32.92	0.0013	-	SVSGKPQYMVLVPSLLHTETTEK	G
9	gi|224053	macroglobulin alpha2	1622	160704	107	79	63	48	49.1	1880	1	0	1	859.137	2574.39	3	2574.39	-0.0028	1	21.32	0.34	R	SASNMAIVDVKMVSGFIPLKPTVK	M
9	gi|224053	macroglobulin alpha2	1622	160704	107	79	63	48	49.1	1889	1	0	1	863.118	2586.33	3	2586.34	-0.0048	0	20.91	0.014	-	SVSGKPQYMVLVPSLLHTETTEK	G
9	gi|224053	macroglobulin alpha2	1622	160704	107	79	63	48	49.1	1890	1	0	1	863.118	2586.33	3	2586.34	-0.0033	0	20.16	0.065	-	SVSGKPQYMVLVPSLLHTETTEK	G
9	gi|224053	macroglobulin alpha2	1622	160704	107	79	63	48	49.1	1931	1	0	1	877.455	2629.34	3	2629.34	0.0004	0	7.39	0.2	-	SVSGKPQYMVLVPSLLHTETTEK	G
9	gi|224053	macroglobulin alpha2	1622	160704	107	79	63	48	49.1	2002	1	0	1	915.151	2742.43	3	2742.43	0.0034	1	37.42	0.0004	R	TEHPFTVEEFVLPKFEVQVTVPK	I
9	gi|224053	macroglobulin alpha2	1622	160704	107	79	63	48	49.1	2035	1	0	1	1405.72	2809.43	2	2809.44	-0.01	0	33.94	0.0046	R	VVSMDENFHPLNELIPLVYIQDPK	G
9	gi|224053	macroglobulin alpha2	1622	160704	107	79	63	48	49.1	2069	1	0	1	1427.22	2852.43	2	2852.44	-0.0114	0	11.23	0.089	R	VVSMDENFHPLNELIPLVYIQDPK	G
9	gi|224053	macroglobulin alpha2	1622	160704	107	79	63	48	49.1	2070	1	0	1	951.82	2852.44	3	2852.44	-0.0049	0	25.35	0.0048	R	VVSMDENFHPLNELIPLVYIQDPK	G
9	gi|224053	macroglobulin alpha2	1622	160704	107	79	63	48	49.1	2103	1	0	1	973.18	2916.52	3	2916.52	0.0031	0	54.89	1.7e-05	R	AVDQSVLLMKPDAELSASSVYNLLPEK	D
9	gi|224053	macroglobulin alpha2	1622	160704	107	79	63	48	49.1	2121	1	0	1	987.517	2959.53	3	2959.52	0.0074	0	45.2	0.041	R	AVDQSVLLMKPDAELSASSVYNLLPEK	D
9	gi|224053	macroglobulin alpha2	1622	160704	107	79	63	48	49.1	2191	1	0	1	1060.88	3179.61	3	3179.61	0.0042	1	17.85	0.18	R	VVSMDENFHPLNELIPLVYIQDPKGNR	I
9	gi|224053	macroglobulin alpha2	1622	160704	107	79	63	48	49.1	2209	1	0	1	1075.21	3222.62	3	3222.61	0.0043	1	23.18	0.0067	R	VVSMDENFHPLNELIPLVYIQDPKGNR	I
9	gi|224053	macroglobulin alpha2	1622	160704	107	79	63	48	49.1	2229	1	0	1	835.378	3337.48	4	3337.48	0.0034	0	50.36	6.5e-05	R	SPCYGYQWVSEEHEEAHHTAYLVFSPSK	S
10	gi|177870	alpha-2-macroglobulin precursor [Homo sapiens]	1617	163175	105	79	64	49	49	106	1	0	1	484.781	967.546	2	967.545	0.0014	0	12.68	0.22	R	TGTHGLLVK	Q
10	gi|177870	alpha-2-macroglobulin precursor [Homo sapiens]	1617	163175	105	79	64	49	49	139	3	0	1	509.797	1017.58	2	1017.59	-0.0064	0	10.56	0.74	K	ATVLNYLPK	C
10	gi|177870	alpha-2-macroglobulin precursor [Homo sapiens]	1617	163175	105	79	64	49	49	160	1	0	1	523.8	1045.58	2	1045.58	0.0038	0	11.2	0.23	K	FEVQVTVPK	I
10	gi|177870	alpha-2-macroglobulin precursor [Homo sapiens]	1617	163175	105	79	64	49	49	188	1	0	1	540.328	1078.64	2	1078.64	0.0022	1	12.48	0.4	R	TITKLSFVK	V
10	gi|177870	alpha-2-macroglobulin precursor [Homo sapiens]	1617	163175	105	79	64	49	49	190	1	0	1	542.811	1083.61	2	1083.61	-0.0002	0	23.03	0.17	K	GHFSISIPVK	S
10	gi|177870	alpha-2-macroglobulin precursor [Homo sapiens]	1617	163175	105	79	64	49	49	206	1	0	1	553.329	1104.64	2	1104.64	0.0039	2	13.41	0.24	K	TKVFQLKR	K
10	gi|177870	alpha-2-macroglobulin precursor [Homo sapiens]	1617	163175	105	79	64	49	49	211	1	0	1	558.796	1115.58	2	1115.6	-0.0199	0	34.54	0.0059	R	QTVSWAVTPK	S
10	gi|177870	alpha-2-macroglobulin precursor [Homo sapiens]	1617	163175	105	79	64	49	49	229	1	0	1	564.316	1126.62	2	1126.61	0.0038	0	22.43	0.11	K	GHFSISIPVK	S
10	gi|177870	alpha-2-macroglobulin precursor [Homo sapiens]	1617	163175	105	79	64	49	49	238	1	0	1	567.797	1133.58	2	1133.58	0.0036	0	30.33	0.0051	R	SASNMAIVDVK	M
10	gi|177870	alpha-2-macroglobulin precursor [Homo sapiens]	1617	163175	105	79	64	49	49	251	1	0	1	574.814	1147.61	2	1147.61	-0.001	0	30.32	0.013	R	QGIPFFGQVR	L
10	gi|177870	alpha-2-macroglobulin precursor [Homo sapiens]	1617	163175	105	79	64	49	49	320	1	0	1	605.826	1209.64	2	1209.64	0.0029	0	48.07	0.00018	K	LPPNVVEESAR	A
10	gi|177870	alpha-2-macroglobulin precursor [Homo sapiens]	1617	163175	105	79	64	49	49	345	1	0	1	613.281	1224.55	2	1224.54	0.0038	0	32.16	0.0029	K	YDVENCLANK	V
10	gi|177870	alpha-2-macroglobulin precursor [Homo sapiens]	1617	163175	105	79	64	49	49	386	1	0	1	628.326	1254.64	2	1254.64	0.0014	0	58.02	5e-05	K	AIGYLNTGYQR	Q
10	gi|177870	alpha-2-macroglobulin precursor [Homo sapiens]	1617	163175	105	79	64	49	49	391	1	0	1	630.292	1258.57	2	1258.57	0.0046	0	89.12	1e-07	R	VGFYESDVMGR	G
10	gi|177870	alpha-2-macroglobulin precursor [Homo sapiens]	1617	163175	105	79	64	49	49	406	1	0	1	636.841	1271.67	2	1271.67	0.0026	0	71.15	7.5e-06	R	VTAAPQSVCALR	A
10	gi|177870	alpha-2-macroglobulin precursor [Homo sapiens]	1617	163175	105	79	64	49	49	424	1	0	1	640.374	1278.73	2	1278.73	0.0029	1	14.05	0.55	R	LVDGKGVPIPNK	V
10	gi|177870	alpha-2-macroglobulin precursor [Homo sapiens]	1617	163175	105	79	64	49	49	449	1	0	1	649.828	1297.64	2	1297.64	-0.0008	0	32.32	0.026	K	AIGYLNTGYQR	Q
10	gi|177870	alpha-2-macroglobulin precursor [Homo sapiens]	1617	163175	105	79	64	49	49	545	1	0	1	689.368	1376.72	2	1376.72	0.0006	1	54.59	0.0038	K	LSFVKVDSHFR	Q
10	gi|177870	alpha-2-macroglobulin precursor [Homo sapiens]	1617	163175	105	79	64	49	49	562	1	0	1	697.845	1393.68	2	1393.67	0.0029	0	49.43	0.00028	K	NEDSLVFVQTDK	S
10	gi|177870	alpha-2-macroglobulin precursor [Homo sapiens]	1617	163175	105	79	64	49	49	563	1	0	1	698.429	1394.84	2	1394.84	0.0031	1	43.75	0.027	K	GVPIPNKVIFIR	G
10	gi|177870	alpha-2-macroglobulin precursor [Homo sapiens]	1617	163175	105	79	64	49	49	566	1	0	1	701.385	1400.76	2	1400.75	0.005	1	14.8	0.11	K	EVLKSLNEEAVK	K
10	gi|177870	alpha-2-macroglobulin precursor [Homo sapiens]	1617	163175	105	79	64	49	49	590	1	0	1	709.804	1417.59	2	1417.59	0.0046	0	63.5	8.9e-06	K	HYDGSYSTFGER	Y
10	gi|177870	alpha-2-macroglobulin precursor [Homo sapiens]	1617	163175	105	79	64	49	49	593	1	0	1	710.389	1418.76	2	1418.76	0.0013	1	31.2	0.0059	K	KLSFYYLIMAK	G
10	gi|177870	alpha-2-macroglobulin precursor [Homo sapiens]	1617	163175	105	79	64	49	49	597	1	0	1	710.872	1419.73	2	1419.73	0.0027	1	31.39	0.014	K	LSFVKVDSHFR	Q
10	gi|177870	alpha-2-macroglobulin precursor [Homo sapiens]	1617	163175	105	79	64	49	49	616	1	0	1	719.933	1437.85	2	1437.85	0.0048	1	19.14	0.016	K	GVPIPNKVIFIR	G
10	gi|177870	alpha-2-macroglobulin precursor [Homo sapiens]	1617	163175	105	79	64	49	49	625	1	0	1	724.827	1447.64	2	1447.64	0.0023	0	57.89	2.7e-05	K	DMYSFLEDMGLK	A
10	gi|177870	alpha-2-macroglobulin precursor [Homo sapiens]	1617	163175	105	79	64	49	49	641	1	0	1	730.421	1458.83	2	1458.83	0.0006	0	30.16	0.0041	K	MVSGFIPLKPTVK	M
10	gi|177870	alpha-2-macroglobulin precursor [Homo sapiens]	1617	163175	105	79	64	49	49	642	1	0	1	731.307	1460.6	2	1460.6	0.0034	0	61.37	8e-06	K	HYDGSYSTFGER	Y
10	gi|177870	alpha-2-macroglobulin precursor [Homo sapiens]	1617	163175	105	79	64	49	49	650	1	0	1	733.911	1465.81	2	1465.8	0.0027	1	16.66	0.056	K	SIYKPGQTVKFR	V
10	gi|177870	alpha-2-macroglobulin precursor [Homo sapiens]	1617	163175	105	79	64	49	49	676	1	0	1	745.91	1489.81	2	1489.81	-0.0012	1	30.41	0.0085	K	ATVLNYLPKCIR	V
10	gi|177870	alpha-2-macroglobulin precursor [Homo sapiens]	1617	163175	105	79	64	49	49	679	1	0	1	746.332	1490.65	2	1490.64	0.0063	0	55.42	0.00016	K	DMYSFLEDMGLK	A
10	gi|177870	alpha-2-macroglobulin precursor [Homo sapiens]	1617	163175	105	79	64	49	49	681	1	0	1	746.404	1490.79	2	1490.79	0.0051	0	65.51	1.9e-06	R	NQGNTWLTAFVLK	T
10	gi|177870	alpha-2-macroglobulin precursor [Homo sapiens]	1617	163175	105	79	64	49	49	700	1	0	1	751.915	1501.81	2	1501.83	-0.0178	0	9.85	0.6	K	MVSGFIPLKPTVK	M
10	gi|177870	alpha-2-macroglobulin precursor [Homo sapiens]	1617	163175	105	79	64	49	49	711	1	0	1	755.412	1508.81	2	1508.81	0.0003	1	13.86	0.59	K	SIYKPGQTVKFR	V
10	gi|177870	alpha-2-macroglobulin precursor [Homo sapiens]	1617	163175	105	79	64	49	49	718	1	0	1	757.391	1512.77	2	1512.77	0	1	63.94	4.6e-05	K	SKAIGYLNTGYQR	Q
10	gi|177870	alpha-2-macroglobulin precursor [Homo sapiens]	1617	163175	105	79	64	49	49	740	1	0	1	767.411	1532.81	2	1532.81	-0.0053	1	14.21	0.082	K	ATVLNYLPKCIR	V
10	gi|177870	alpha-2-macroglobulin precursor [Homo sapiens]	1617	163175	105	79	64	49	49	743	1	0	1	767.905	1533.8	2	1533.79	0.0019	0	25.54	0.0072	R	NQGNTWLTAFVLK	T
10	gi|177870	alpha-2-macroglobulin precursor [Homo sapiens]	1617	163175	105	79	64	49	49	761	1	0	1	515.938	1544.79	3	1544.79	-0.0013	0	56.4	1.6e-05	R	LVHVEEPHTETVR	K
10	gi|177870	alpha-2-macroglobulin precursor [Homo sapiens]	1617	163175	105	79	64	49	49	762	1	0	1	773.407	1544.8	2	1544.79	0.0037	0	20.53	0.047	R	LVHVEEPHTETVR	K
10	gi|177870	alpha-2-macroglobulin precursor [Homo sapiens]	1617	163175	105	79	64	49	49	790	1	0	1	783.419	1564.82	2	1564.82	-0.0007	0	62.39	3.3e-06	K	ALLAYAFALAGNQDK	R
10	gi|177870	alpha-2-macroglobulin precursor [Homo sapiens]	1617	163175	105	79	64	49	49	824	1	0	1	794.908	1587.8	2	1587.8	0.0005	0	28.65	0.0082	R	LVHVEEPHTETVR	K
10	gi|177870	alpha-2-macroglobulin precursor [Homo sapiens]	1617	163175	105	79	64	49	49	825	1	0	1	530.274	1587.8	3	1587.8	0.0008	0	47.52	5.7e-05	R	LVHVEEPHTETVR	K
10	gi|177870	alpha-2-macroglobulin precursor [Homo sapiens]	1617	163175	105	79	64	49	49	838	1	0	1	800.412	1598.81	2	1598.81	0.0004	1	34.31	0.0023	R	TGTHGLLVKQEDMK	G
10	gi|177870	alpha-2-macroglobulin precursor [Homo sapiens]	1617	163175	105	79	64	49	49	848	1	0	1	802.925	1603.84	2	1603.84	0	0	52.49	8.4e-05	R	IAQWQSFQLEGGLK	Q
10	gi|177870	alpha-2-macroglobulin precursor [Homo sapiens]	1617	163175	105	79	64	49	49	853	1	0	1	804.913	1607.81	2	1607.83	-0.0189	0	53.86	5.8e-05	K	ALLAYAFALAGNQDK	R
10	gi|177870	alpha-2-macroglobulin precursor [Homo sapiens]	1617	163175	105	79	64	49	49	855	1	0	1	804.923	1607.83	2	1607.83	0.0007	0	64.74	7.1e-06	K	ALLAYAFALAGNQDK	R
10	gi|177870	alpha-2-macroglobulin precursor [Homo sapiens]	1617	163175	105	79	64	49	49	868	1	0	1	809.428	1616.84	2	1616.84	-0.0005	0	60.91	3.3e-06	R	TEVSSNHVLIYLDK	V
10	gi|177870	alpha-2-macroglobulin precursor [Homo sapiens]	1617	163175	105	79	64	49	49	917	1	0	1	824.429	1646.84	2	1646.84	0.001	0	34.46	0.0037	R	IAQWQSFQLEGGLK	Q
10	gi|177870	alpha-2-macroglobulin precursor [Homo sapiens]	1617	163175	105	79	64	49	49	932	1	0	1	830.93	1659.85	2	1659.85	-0.0015	0	30.92	0.0084	R	TEVSSNHVLIYLDK	V
10	gi|177870	alpha-2-macroglobulin precursor [Homo sapiens]	1617	163175	105	79	64	49	49	935	2	0	1	555.28	1662.82	3	1662.82	-0.0051	0	1.43	1	K	DNSVHWERPQKPK	A
10	gi|177870	alpha-2-macroglobulin precursor [Homo sapiens]	1617	163175	105	79	64	49	49	952	1	0	1	558.291	1671.85	3	1671.85	-0.0009	0	17.23	0.024	R	TEHPFTVEEFVLPK	F
10	gi|177870	alpha-2-macroglobulin precursor [Homo sapiens]	1617	163175	105	79	64	49	49	953	1	0	1	836.934	1671.85	2	1671.85	0.0034	0	30.5	0.0045	R	TEHPFTVEEFVLPK	F
10	gi|177870	alpha-2-macroglobulin precursor [Homo sapiens]	1617	163175	105	79	64	49	49	1012	1	0	1	858.435	1714.86	2	1714.86	-0.0004	0	19.38	0.046	R	TEHPFTVEEFVLPK	F
10	gi|177870	alpha-2-macroglobulin precursor [Homo sapiens]	1617	163175	105	79	64	49	49	1071	1	0	1	882.971	1763.93	2	1763.93	-0.0036	1	51.84	0.00022	K	ALLAYAFALAGNQDKR	K
10	gi|177870	alpha-2-macroglobulin precursor [Homo sapiens]	1617	163175	105	79	64	49	49	1085	1	0	1	890.508	1779	2	1779	-0.0025	0	51.35	4.8e-05	K	DTVIKPLLVEPEGLEK	E
10	gi|177870	alpha-2-macroglobulin precursor [Homo sapiens]	1617	163175	105	79	64	49	49	1127	1	0	1	904.475	1806.94	2	1806.94	-0.0024	1	17.5	0.037	K	ALLAYAFALAGNQDKR	K
10	gi|177870	alpha-2-macroglobulin precursor [Homo sapiens]	1617	163175	105	79	64	49	49	1128	1	0	1	904.503	1806.99	2	1806.99	0.0027	1	27.21	0.0028	R	GEAFTLKATVLNYLPK	C
10	gi|177870	alpha-2-macroglobulin precursor [Homo sapiens]	1617	163175	105	79	64	49	49	1148	1	0	1	912.013	1822.01	2	1822.01	0.0023	0	59.13	0.0017	K	DTVIKPLLVEPEGLEK	E
10	gi|177870	alpha-2-macroglobulin precursor [Homo sapiens]	1617	163175	105	79	64	49	49	1163	1	0	1	612.316	1833.93	3	1833.92	0.0031	1	6.76	0.23	K	KDNSVHWERPQKPK	A
10	gi|177870	alpha-2-macroglobulin precursor [Homo sapiens]	1617	163175	105	79	64	49	49	1185	1	0	1	923.019	1844.02	2	1844.03	-0.0069	0	66.36	1.4e-06	R	LLIYAVLPTGDVIGDSAK	Y
10	gi|177870	alpha-2-macroglobulin precursor [Homo sapiens]	1617	163175	105	79	64	49	49	1190	1	0	1	924.945	1847.88	2	1847.87	0.0024	0	54.47	2.4e-05	K	QFSFPLSSEPFQGSYK	V
10	gi|177870	alpha-2-macroglobulin precursor [Homo sapiens]	1617	163175	105	79	64	49	49	1193	1	0	1	926.005	1849.99	2	1849.99	0.0007	1	40.45	0.00039	R	GEAFTLKATVLNYLPK	C
10	gi|177870	alpha-2-macroglobulin precursor [Homo sapiens]	1617	163175	105	79	64	49	49	1218	1	0	1	933.515	1865.02	2	1865.01	0.0005	0	35.31	0.00068	K	DTVIKPLLVEPEGLEK	E
10	gi|177870	alpha-2-macroglobulin precursor [Homo sapiens]	1617	163175	105	79	64	49	49	1254	1	0	1	942.529	1883.04	2	1883.04	0.0026	0	50.24	3e-05	R	VSVQLEASPAFLAVPVEK	E
10	gi|177870	alpha-2-macroglobulin precursor [Homo sapiens]	1617	163175	105	79	64	49	49	1258	1	0	1	944.52	1887.03	2	1887.04	-0.0089	0	50.45	0.0029	R	LLIYAVLPTGDVIGDSAK	Y
10	gi|177870	alpha-2-macroglobulin precursor [Homo sapiens]	1617	163175	105	79	64	49	49	1333	1	0	1	976.057	1950.1	2	1950.1	-0.0047	1	43.93	0.00029	R	KDTVIKPLLVEPEGLEK	E
10	gi|177870	alpha-2-macroglobulin precursor [Homo sapiens]	1617	163175	105	79	64	49	49	1334	1	0	1	651.043	1950.11	3	1950.1	0.0035	1	25.44	0.0041	R	KDTVIKPLLVEPEGLEK	E
10	gi|177870	alpha-2-macroglobulin precursor [Homo sapiens]	1617	163175	105	79	64	49	49	1362	1	0	1	990.536	1979.06	2	1979.06	-0.0022	1	23.94	0.015	K	GHFSISIPVKSDIAPVAR	L
10	gi|177870	alpha-2-macroglobulin precursor [Homo sapiens]	1617	163175	105	79	64	49	49	1372	1	0	1	663.706	1988.1	3	1988.1	0.0014	1	11.03	0.21	K	MVSGFIPLKPTVKMLER	S
10	gi|177870	alpha-2-macroglobulin precursor [Homo sapiens]	1617	163175	105	79	64	49	49	1396	1	0	1	1016.56	2031.1	2	2031.1	0.0009	1	16.75	0.15	K	MVSGFIPLKPTVKMLER	S
10	gi|177870	alpha-2-macroglobulin precursor [Homo sapiens]	1617	163175	105	79	64	49	49	1397	2	0	1	1016.56	2031.1	2	2031.1	0.0037	1	1.97	1.1	K	MVSGFIPLKPTVKMLER	S
10	gi|177870	alpha-2-macroglobulin precursor [Homo sapiens]	1617	163175	105	79	64	49	49	1398	1	0	1	678.043	2031.11	3	2031.1	0.0051	1	7.51	0.35	K	MVSGFIPLKPTVKMLER	S
10	gi|177870	alpha-2-macroglobulin precursor [Homo sapiens]	1617	163175	105	79	64	49	49	1411	1	0	1	1023.03	2044.05	2	2044.05	0.0044	0	54.12	1.1e-05	R	AFQPFFVELTMPYSVIR	G
10	gi|177870	alpha-2-macroglobulin precursor [Homo sapiens]	1617	163175	105	79	64	49	49	1414	1	0	1	1023.05	2044.09	2	2044.09	0.0022	0	25.29	0.0042	R	LLLQQVSLPELPGEYSMK	V
10	gi|177870	alpha-2-macroglobulin precursor [Homo sapiens]	1617	163175	105	79	64	49	49	1418	1	0	1	683.691	2048.05	3	2048.04	0.0072	0	64.18	9.6e-07	K	VDLSFSPSQSLPASHAHLR	V
10	gi|177870	alpha-2-macroglobulin precursor [Homo sapiens]	1617	163175	105	79	64	49	49	1443	1	0	1	691.982	2072.93	3	2072.92	0.0024	0	36.84	0.0012	K	MCPQLQQYEMHGPEGLR	V
10	gi|177870	alpha-2-macroglobulin precursor [Homo sapiens]	1617	163175	105	79	64	49	49	1444	1	0	1	1038.06	2074.11	2	2074.11	-0.0017	1	8.52	0.3	K	MVSGFIPLKPTVKMLER	S
10	gi|177870	alpha-2-macroglobulin precursor [Homo sapiens]	1617	163175	105	79	64	49	49	1457	1	0	1	1044.54	2087.06	2	2087.05	0.003	0	45.82	8.4e-05	R	AFQPFFVELTMPYSVIR	G
10	gi|177870	alpha-2-macroglobulin precursor [Homo sapiens]	1617	163175	105	79	64	49	49	1463	1	0	1	1044.56	2087.1	2	2087.1	0.0042	0	76.35	1.5e-06	R	LLLQQVSLPELPGEYSMK	V
10	gi|177870	alpha-2-macroglobulin precursor [Homo sapiens]	1617	163175	105	79	64	49	49	1481	1	0	1	702.6	2104.78	3	2104.77	0.0049	0	15.18	0.038	K	YSDASDCHGEDSQAFCEK	F
10	gi|177870	alpha-2-macroglobulin precursor [Homo sapiens]	1617	163175	105	79	64	49	49	1483	1	0	1	703.321	2106.94	3	2106.94	0.0017	1	27.85	0.0024	R	QLNYKHYDGSYSTFGER	Y
10	gi|177870	alpha-2-macroglobulin precursor [Homo sapiens]	1617	163175	105	79	64	49	49	1491	1	0	1	1058.98	2115.94	2	2115.93	0.0124	0	47.42	4.2e-05	K	MCPQLQQYEMHGPEGLR	V
10	gi|177870	alpha-2-macroglobulin precursor [Homo sapiens]	1617	163175	105	79	64	49	49	1518	1	0	1	1070.49	2138.97	2	2138.97	0.0016	1	15.28	0.045	K	DMYSFLEDMGLKAFTNSK	I
10	gi|177870	alpha-2-macroglobulin precursor [Homo sapiens]	1617	163175	105	79	64	49	49	1542	1	0	1	721.731	2162.17	3	2162.17	-0.0009	0	24.5	0.014	K	VSNQTLSLFFTVLQDVPVR	D
10	gi|177870	alpha-2-macroglobulin precursor [Homo sapiens]	1617	163175	105	79	64	49	49	1543	1	0	1	1082.1	2162.18	2	2162.17	0.0031	0	52.77	4.2e-05	K	VSNQTLSLFFTVLQDVPVR	D
10	gi|177870	alpha-2-macroglobulin precursor [Homo sapiens]	1617	163175	105	79	64	49	49	1560	1	0	1	1091.99	2181.97	2	2181.97	-0.0002	1	14.92	0.04	K	DMYSFLEDMGLKAFTNSK	I
10	gi|177870	alpha-2-macroglobulin precursor [Homo sapiens]	1617	163175	105	79	64	49	49	1580	1	0	1	737.055	2208.14	3	2208.14	-0.0002	1	18.27	0.019	R	NQGNTWLTAFVLKTFAQAR	A
10	gi|177870	alpha-2-macroglobulin precursor [Homo sapiens]	1617	163175	105	79	64	49	49	1733	1	0	1	796.404	2386.19	3	2386.19	0.001	0	16.99	0.025	K	QQNAQGGFSSTQDTVVALHALSK	Y
10	gi|177870	alpha-2-macroglobulin precursor [Homo sapiens]	1617	163175	105	79	64	49	49	1738	1	0	1	1199.08	2396.14	2	2396.14	-0.0001	0	36.75	0.00037	K	ETTFNSLLCPSGGEVSEELSLK	L
10	gi|177870	alpha-2-macroglobulin precursor [Homo sapiens]	1617	163175	105	79	64	49	49	1767	1	0	1	818.061	2451.16	3	2451.16	0.0037	2	3.88	0.97	K	DMYSFLEDMGLKAFTNSKIR	K
10	gi|177870	alpha-2-macroglobulin precursor [Homo sapiens]	1617	163175	105	79	64	49	49	1777	1	0	1	824.067	2469.18	3	2469.17	0.0062	1	54.51	2.1e-05	R	KPKMCPQLQQYEMHGPEGLR	V
10	gi|177870	alpha-2-macroglobulin precursor [Homo sapiens]	1617	163175	105	79	64	49	49	1778	1	0	1	618.304	2469.19	4	2469.17	0.015	1	43.95	7.6e-05	R	KPKMCPQLQQYEMHGPEGLR	V
10	gi|177870	alpha-2-macroglobulin precursor [Homo sapiens]	1617	163175	105	79	64	49	49	1782	1	0	1	825.745	2474.21	3	2474.22	-0.0032	0	15.28	0.6	R	SLFTDLEAENDVLHCVAFAVPK	S
10	gi|177870	alpha-2-macroglobulin precursor [Homo sapiens]	1617	163175	105	79	64	49	49	1783	1	0	1	1238.12	2474.22	2	2474.22	0.0005	0	8.69	0.15	R	SLFTDLEAENDVLHCVAFAVPK	S
10	gi|177870	alpha-2-macroglobulin precursor [Homo sapiens]	1617	163175	105	79	64	49	49	1806	1	0	1	838.4	2512.18	3	2512.18	-0.0001	1	41.38	0.00013	R	KPKMCPQLQQYEMHGPEGLR	V
10	gi|177870	alpha-2-macroglobulin precursor [Homo sapiens]	1617	163175	105	79	64	49	49	1880	1	0	1	859.137	2574.39	3	2574.39	-0.0028	1	21.32	0.34	R	SASNMAIVDVKMVSGFIPLKPTVK	M
10	gi|177870	alpha-2-macroglobulin precursor [Homo sapiens]	1617	163175	105	79	64	49	49	2002	1	0	1	915.151	2742.43	3	2742.43	0.0034	1	37.42	0.0004	R	TEHPFTVEEFVLPKFEVQVTVPK	I
10	gi|177870	alpha-2-macroglobulin precursor [Homo sapiens]	1617	163175	105	79	64	49	49	2035	1	0	1	1405.72	2809.43	2	2809.44	-0.01	0	33.94	0.0046	R	VVSMDENFHPLNELIPLVYIQDPK	G
10	gi|177870	alpha-2-macroglobulin precursor [Homo sapiens]	1617	163175	105	79	64	49	49	2069	1	0	1	1427.22	2852.43	2	2852.44	-0.0114	0	11.23	0.089	R	VVSMDENFHPLNELIPLVYIQDPK	G
10	gi|177870	alpha-2-macroglobulin precursor [Homo sapiens]	1617	163175	105	79	64	49	49	2070	1	0	1	951.82	2852.44	3	2852.44	-0.0049	0	25.35	0.0048	R	VVSMDENFHPLNELIPLVYIQDPK	G
10	gi|177870	alpha-2-macroglobulin precursor [Homo sapiens]	1617	163175	105	79	64	49	49	2103	1	0	1	973.18	2916.52	3	2916.52	0.0031	0	54.89	1.7e-05	R	AVDQSVLLMKPDAELSASSVYNLLPEK	D
10	gi|177870	alpha-2-macroglobulin precursor [Homo sapiens]	1617	163175	105	79	64	49	49	2121	1	0	1	987.517	2959.53	3	2959.52	0.0074	0	45.2	0.041	R	AVDQSVLLMKPDAELSASSVYNLLPEK	D
10	gi|177870	alpha-2-macroglobulin precursor [Homo sapiens]	1617	163175	105	79	64	49	49	2191	1	0	1	1060.88	3179.61	3	3179.61	0.0042	1	17.85	0.18	R	VVSMDENFHPLNELIPLVYIQDPKGNR	I
10	gi|177870	alpha-2-macroglobulin precursor [Homo sapiens]	1617	163175	105	79	64	49	49	2209	1	0	1	1075.21	3222.62	3	3222.61	0.0043	1	23.18	0.0067	R	VVSMDENFHPLNELIPLVYIQDPKGNR	I
10	gi|177870	alpha-2-macroglobulin precursor [Homo sapiens]	1617	163175	105	79	64	49	49	2229	1	0	1	835.378	3337.48	4	3337.48	0.0034	0	50.36	6.5e-05	R	SPCYGYQWVSEEHEEAHHTAYLVFSPSK	S
10	gi|177872	alpha-2-macroglobulin, partial [Homo sapiens]	557	70751	36	26	22	17	36.9	211	1	0	1	558.796	1115.58	2	1115.6	-0.0199	0	34.54	0.0059	R	QTVSWAVTPK	S
10	gi|177872	alpha-2-macroglobulin, partial [Homo sapiens]	557	70751	36	26	22	17	36.9	238	1	0	1	567.797	1133.58	2	1133.58	0.0036	0	30.33	0.0051	R	SASNMAIVDVK	M
10	gi|177872	alpha-2-macroglobulin, partial [Homo sapiens]	557	70751	36	26	22	17	36.9	320	1	0	1	605.826	1209.64	2	1209.64	0.0029	0	48.07	0.00018	K	LPPNVVEESAR	A
10	gi|177872	alpha-2-macroglobulin, partial [Homo sapiens]	557	70751	36	26	22	17	36.9	386	1	0	1	628.326	1254.64	2	1254.64	0.0014	0	58.02	5e-05	K	AIGYLNTGYQR	Q
10	gi|177872	alpha-2-macroglobulin, partial [Homo sapiens]	557	70751	36	26	22	17	36.9	449	1	0	1	649.828	1297.64	2	1297.64	-0.0008	0	32.32	0.026	K	AIGYLNTGYQR	Q
10	gi|177872	alpha-2-macroglobulin, partial [Homo sapiens]	557	70751	36	26	22	17	36.9	566	1	0	1	701.385	1400.76	2	1400.75	0.005	1	14.8	0.11	K	EVLKSLNEEAVK	K
10	gi|177872	alpha-2-macroglobulin, partial [Homo sapiens]	557	70751	36	26	22	17	36.9	590	1	0	1	709.804	1417.59	2	1417.59	0.0046	0	63.5	8.9e-06	K	HYDGSYSTFGER	Y
10	gi|177872	alpha-2-macroglobulin, partial [Homo sapiens]	557	70751	36	26	22	17	36.9	641	1	0	1	730.421	1458.83	2	1458.83	0.0006	0	30.16	0.0041	K	MVSGFIPLKPTVK	M
10	gi|177872	alpha-2-macroglobulin, partial [Homo sapiens]	557	70751	36	26	22	17	36.9	642	1	0	1	731.307	1460.6	2	1460.6	0.0034	0	61.37	8e-06	K	HYDGSYSTFGER	Y
10	gi|177872	alpha-2-macroglobulin, partial [Homo sapiens]	557	70751	36	26	22	17	36.9	681	1	0	1	746.404	1490.79	2	1490.79	0.0051	0	65.51	1.9e-06	R	NQGNTWLTAFVLK	T
10	gi|177872	alpha-2-macroglobulin, partial [Homo sapiens]	557	70751	36	26	22	17	36.9	700	1	0	1	751.915	1501.81	2	1501.83	-0.0178	0	9.85	0.6	K	MVSGFIPLKPTVK	M
10	gi|177872	alpha-2-macroglobulin, partial [Homo sapiens]	557	70751	36	26	22	17	36.9	718	1	0	1	757.391	1512.77	2	1512.77	0	1	63.94	4.6e-05	K	SKAIGYLNTGYQR	Q
10	gi|177872	alpha-2-macroglobulin, partial [Homo sapiens]	557	70751	36	26	22	17	36.9	743	1	0	1	767.905	1533.8	2	1533.79	0.0019	0	25.54	0.0072	R	NQGNTWLTAFVLK	T
10	gi|177872	alpha-2-macroglobulin, partial [Homo sapiens]	557	70751	36	26	22	17	36.9	868	1	0	1	809.428	1616.84	2	1616.84	-0.0005	0	60.91	3.3e-06	R	TEVSSNHVLIYLDK	V
10	gi|177872	alpha-2-macroglobulin, partial [Homo sapiens]	557	70751	36	26	22	17	36.9	932	1	0	1	830.93	1659.85	2	1659.85	-0.0015	0	30.92	0.0084	R	TEVSSNHVLIYLDK	V
10	gi|177872	alpha-2-macroglobulin, partial [Homo sapiens]	557	70751	36	26	22	17	36.9	935	2	0	1	555.28	1662.82	3	1662.82	-0.0051	0	1.43	1	K	DNSVHWERPQKPK	A
10	gi|177872	alpha-2-macroglobulin, partial [Homo sapiens]	557	70751	36	26	22	17	36.9	1085	1	0	1	890.508	1779	2	1779	-0.0025	0	51.35	4.8e-05	K	DTVIKPLLVEPEGLEK	E
10	gi|177872	alpha-2-macroglobulin, partial [Homo sapiens]	557	70751	36	26	22	17	36.9	1148	1	0	1	912.013	1822.01	2	1822.01	0.0023	0	59.13	0.0017	K	DTVIKPLLVEPEGLEK	E
10	gi|177872	alpha-2-macroglobulin, partial [Homo sapiens]	557	70751	36	26	22	17	36.9	1163	1	0	1	612.316	1833.93	3	1833.92	0.0031	1	6.76	0.23	K	KDNSVHWERPQKPK	A
10	gi|177872	alpha-2-macroglobulin, partial [Homo sapiens]	557	70751	36	26	22	17	36.9	1218	1	0	1	933.515	1865.02	2	1865.01	0.0005	0	35.31	0.00068	K	DTVIKPLLVEPEGLEK	E
10	gi|177872	alpha-2-macroglobulin, partial [Homo sapiens]	557	70751	36	26	22	17	36.9	1333	1	0	1	976.057	1950.1	2	1950.1	-0.0047	1	43.93	0.00029	R	KDTVIKPLLVEPEGLEK	E
10	gi|177872	alpha-2-macroglobulin, partial [Homo sapiens]	557	70751	36	26	22	17	36.9	1334	1	0	1	651.043	1950.11	3	1950.1	0.0035	1	25.44	0.0041	R	KDTVIKPLLVEPEGLEK	E
10	gi|177872	alpha-2-macroglobulin, partial [Homo sapiens]	557	70751	36	26	22	17	36.9	1372	1	0	1	663.706	1988.1	3	1988.1	0.0014	1	11.03	0.21	K	MVSGFIPLKPTVKMLER	S
10	gi|177872	alpha-2-macroglobulin, partial [Homo sapiens]	557	70751	36	26	22	17	36.9	1396	1	0	1	1016.56	2031.1	2	2031.1	0.0009	1	16.75	0.15	K	MVSGFIPLKPTVKMLER	S
10	gi|177872	alpha-2-macroglobulin, partial [Homo sapiens]	557	70751	36	26	22	17	36.9	1397	2	0	1	1016.56	2031.1	2	2031.1	0.0037	1	1.97	1.1	K	MVSGFIPLKPTVKMLER	S
10	gi|177872	alpha-2-macroglobulin, partial [Homo sapiens]	557	70751	36	26	22	17	36.9	1398	1	0	1	678.043	2031.11	3	2031.1	0.0051	1	7.51	0.35	K	MVSGFIPLKPTVKMLER	S
10	gi|177872	alpha-2-macroglobulin, partial [Homo sapiens]	557	70751	36	26	22	17	36.9	1414	1	0	1	1023.05	2044.09	2	2044.09	0.0022	0	25.29	0.0042	R	LLLQQVSLPELPGEYSMK	V
10	gi|177872	alpha-2-macroglobulin, partial [Homo sapiens]	557	70751	36	26	22	17	36.9	1444	1	0	1	1038.06	2074.11	2	2074.11	-0.0017	1	8.52	0.3	K	MVSGFIPLKPTVKMLER	S
10	gi|177872	alpha-2-macroglobulin, partial [Homo sapiens]	557	70751	36	26	22	17	36.9	1463	1	0	1	1044.56	2087.1	2	2087.1	0.0042	0	76.35	1.5e-06	R	LLLQQVSLPELPGEYSMK	V
10	gi|177872	alpha-2-macroglobulin, partial [Homo sapiens]	557	70751	36	26	22	17	36.9	1483	1	0	1	703.321	2106.94	3	2106.94	0.0017	1	27.85	0.0024	R	QLNYKHYDGSYSTFGER	Y
10	gi|177872	alpha-2-macroglobulin, partial [Homo sapiens]	557	70751	36	26	22	17	36.9	1542	1	0	1	721.731	2162.17	3	2162.17	-0.0009	0	24.5	0.014	K	VSNQTLSLFFTVLQDVPVR	D
10	gi|177872	alpha-2-macroglobulin, partial [Homo sapiens]	557	70751	36	26	22	17	36.9	1543	1	0	1	1082.1	2162.18	2	2162.17	0.0031	0	52.77	4.2e-05	K	VSNQTLSLFFTVLQDVPVR	D
10	gi|177872	alpha-2-macroglobulin, partial [Homo sapiens]	557	70751	36	26	22	17	36.9	1580	1	0	1	737.055	2208.14	3	2208.14	-0.0002	1	18.27	0.019	R	NQGNTWLTAFVLKTFAQAR	A
10	gi|177872	alpha-2-macroglobulin, partial [Homo sapiens]	557	70751	36	26	22	17	36.9	1733	1	0	1	796.404	2386.19	3	2386.19	0.001	0	16.99	0.025	K	QQNAQGGFSSTQDTVVALHALSK	Y
10	gi|177872	alpha-2-macroglobulin, partial [Homo sapiens]	557	70751	36	26	22	17	36.9	1738	1	0	1	1199.08	2396.14	2	2396.14	-0.0001	0	36.75	0.00037	K	ETTFNSLLCPSGGEVSEELSLK	L
10	gi|177872	alpha-2-macroglobulin, partial [Homo sapiens]	557	70751	36	26	22	17	36.9	1880	1	0	1	859.137	2574.39	3	2574.39	-0.0028	1	21.32	0.34	R	SASNMAIVDVKMVSGFIPLKPTVK	M
10	gi|825615	alpha2-macroglobulin [Homo sapiens]	289	8795	10	10	4	4	58.7	391	1	0	1	630.292	1258.57	2	1258.57	0.0046	0	89.12	1e-07	R	VGFYESDVMGR	G
10	gi|825615	alpha2-macroglobulin [Homo sapiens]	289	8795	10	10	4	4	58.7	761	1	0	1	515.938	1544.79	3	1544.79	-0.0013	0	56.4	1.6e-05	R	LVHVEEPHTETVR	K
10	gi|825615	alpha2-macroglobulin [Homo sapiens]	289	8795	10	10	4	4	58.7	762	1	0	1	773.407	1544.8	2	1544.79	0.0037	0	20.53	0.047	R	LVHVEEPHTETVR	K
10	gi|825615	alpha2-macroglobulin [Homo sapiens]	289	8795	10	10	4	4	58.7	824	1	0	1	794.908	1587.8	2	1587.8	0.0005	0	28.65	0.0082	R	LVHVEEPHTETVR	K
10	gi|825615	alpha2-macroglobulin [Homo sapiens]	289	8795	10	10	4	4	58.7	825	1	0	1	530.274	1587.8	3	1587.8	0.0008	0	47.52	5.7e-05	R	LVHVEEPHTETVR	K
10	gi|825615	alpha2-macroglobulin [Homo sapiens]	289	8795	10	10	4	4	58.7	1443	1	0	1	691.982	2072.93	3	2072.92	0.0024	0	36.84	0.0012	K	MCPQLQQYEMHGPEGLR	V
10	gi|825615	alpha2-macroglobulin [Homo sapiens]	289	8795	10	10	4	4	58.7	1491	1	0	1	1058.98	2115.94	2	2115.93	0.0124	0	47.42	4.2e-05	K	MCPQLQQYEMHGPEGLR	V
10	gi|825615	alpha2-macroglobulin [Homo sapiens]	289	8795	10	10	4	4	58.7	1777	1	0	1	824.067	2469.18	3	2469.17	0.0062	1	54.51	2.1e-05	R	KPKMCPQLQQYEMHGPEGLR	V
10	gi|825615	alpha2-macroglobulin [Homo sapiens]	289	8795	10	10	4	4	58.7	1778	1	0	1	618.304	2469.19	4	2469.17	0.015	1	43.95	7.6e-05	R	KPKMCPQLQQYEMHGPEGLR	V
10	gi|825615	alpha2-macroglobulin [Homo sapiens]	289	8795	10	10	4	4	58.7	1806	1	0	1	838.4	2512.18	3	2512.18	-0.0001	1	41.38	0.00013	R	KPKMCPQLQQYEMHGPEGLR	V
11	gi|178775	proapolipoprotein, partial [Homo sapiens]	1002	28944	72	53	40	32	84.3	89	1	1	0	470.248	938.482	2	938.482	-0.0003	0	15.88	0.33	K	LHELQEK	L
11	gi|178775	proapolipoprotein, partial [Homo sapiens]	1002	28944	72	53	40	32	84.3	150	1	1	0	516.264	1030.51	2	1030.51	0.0023	0	36.83	0.0022	K	LSPLGEEMR	D
11	gi|178775	proapolipoprotein, partial [Homo sapiens]	1002	28944	72	53	40	32	84.3	201	1	1	0	549.799	1097.58	2	1097.58	0.0004	0	29.5	0.015	K	AKPALEDLR	Q
11	gi|178775	proapolipoprotein, partial [Homo sapiens]	1002	28944	72	53	40	32	84.3	305	1	1	0	600.822	1199.63	2	1199.63	0.0026	1	57.74	0.0047	R	LEALKENGGAR	L
11	gi|178775	proapolipoprotein, partial [Homo sapiens]	1002	28944	72	53	40	32	84.3	354	1	1	0	615.859	1229.7	2	1229.7	0.0007	0	34.17	0.023	R	QGLLPVLESFK	V
11	gi|178775	proapolipoprotein, partial [Homo sapiens]	1002	28944	72	53	40	32	84.3	355	1	1	0	615.859	1229.7	2	1229.7	0.0017	0	50.93	0.00024	R	QGLLPVLESFK	V
11	gi|178775	proapolipoprotein, partial [Homo sapiens]	1002	28944	72	53	40	32	84.3	362	1	1	1	618.349	1234.68	2	1234.68	0.0023	0	37.75	0.002	K	DLATVYVDVLK	D
11	gi|178775	proapolipoprotein, partial [Homo sapiens]	1002	28944	72	53	40	32	84.3	366	1	1	0	619.829	1237.64	2	1237.64	0.0012	1	24.03	0.057	R	QKLHELQEK	L
11	gi|178775	proapolipoprotein, partial [Homo sapiens]	1002	28944	72	53	40	32	84.3	373	2	1	0	622.322	1242.63	2	1242.63	-0.0028	1	22.37	1.3	R	LEALKENGGAR	L
11	gi|178775	proapolipoprotein, partial [Homo sapiens]	1002	28944	72	53	40	32	84.3	384	1	1	0	626.816	1251.62	2	1251.61	0.0031	0	22.43	0.13	K	VQPYLDDFQK	K
11	gi|178775	proapolipoprotein, partial [Homo sapiens]	1002	28944	72	53	40	32	84.3	389	1	1	0	629.818	1257.62	2	1257.62	0.0014	0	35.76	0.0064	K	ATEHLSTLSEK	A
11	gi|178775	proapolipoprotein, partial [Homo sapiens]	1002	28944	72	53	40	32	84.3	408	1	1	0	637.362	1272.71	2	1272.71	0.0019	0	35.8	0.0017	R	QGLLPVLESFK	V
11	gi|178775	proapolipoprotein, partial [Homo sapiens]	1002	28944	72	53	40	32	84.3	423	1	1	1	639.852	1277.69	2	1277.69	0.0031	0	8.92	0.15	K	DLATVYVDVLK	D
11	gi|178775	proapolipoprotein, partial [Homo sapiens]	1002	28944	72	53	40	32	84.3	429	1	1	0	642.293	1282.57	2	1282.57	0.0067	0	33.59	0.0057	K	WQEEMELYR	Q
11	gi|178775	proapolipoprotein, partial [Homo sapiens]	1002	28944	72	53	40	32	84.3	452	1	1	0	651.33	1300.65	2	1300.64	0.0043	0	32.15	0.0066	R	THLAPYSDELR	Q
11	gi|178775	proapolipoprotein, partial [Homo sapiens]	1002	28944	72	53	40	32	84.3	504	1	1	0	672.83	1343.65	2	1343.65	-0.0009	0	45.32	0.00031	R	THLAPYSDELR	Q
11	gi|178775	proapolipoprotein, partial [Homo sapiens]	1002	28944	72	53	40	32	84.3	546	1	1	0	689.832	1377.65	2	1377.64	0.0045	1	21.42	0.036	R	QEMSKDLEEVK	A
11	gi|178775	proapolipoprotein, partial [Homo sapiens]	1002	28944	72	53	40	32	84.3	555	1	1	0	693.864	1385.71	2	1385.71	0.0058	0	64.35	4.7e-06	K	VSFLSALEEYTK	K
11	gi|178775	proapolipoprotein, partial [Homo sapiens]	1002	28944	72	53	40	32	84.3	565	1	1	1	700.842	1399.67	2	1399.66	0.0071	0	54.28	8.1e-06	R	DYVSQFEGSALGK	Q
11	gi|178775	proapolipoprotein, partial [Homo sapiens]	1002	28944	72	53	40	32	84.3	581	1	1	0	706.339	1410.66	2	1410.66	0.0031	1	56.24	0.00012	K	KWQEEMELYR	Q
11	gi|178775	proapolipoprotein, partial [Homo sapiens]	1002	28944	72	53	40	32	84.3	602	1	1	0	712.364	1422.71	2	1422.71	-0.0009	1	43.64	0.002	K	VQPYLDDFQKK	W
11	gi|178775	proapolipoprotein, partial [Homo sapiens]	1002	28944	72	53	40	32	84.3	606	1	1	0	715.365	1428.72	2	1428.71	0.0026	0	56.23	1.8e-05	K	VSFLSALEEYTK	K
11	gi|178775	proapolipoprotein, partial [Homo sapiens]	1002	28944	72	53	40	32	84.3	630	1	1	0	727.841	1453.67	2	1453.67	0.0021	1	34.68	0.0067	K	KWQEEMELYR	Q
11	gi|178775	proapolipoprotein, partial [Homo sapiens]	1002	28944	72	53	40	32	84.3	631	1	1	0	727.842	1453.67	2	1453.67	0.0027	1	43.6	0.0005	K	KWQEEMELYR	Q
11	gi|178775	proapolipoprotein, partial [Homo sapiens]	1002	28944	72	53	40	32	84.3	651	1	1	0	734.401	1466.79	2	1466.78	0.0041	1	17.14	0.94	K	VEPLRAELQEGAR	Q
11	gi|178775	proapolipoprotein, partial [Homo sapiens]	1002	28944	72	53	40	32	84.3	686	1	1	0	747.885	1493.75	2	1493.75	0.0032	1	26.26	0.0072	K	AKVQPYLDDFQK	K
11	gi|178775	proapolipoprotein, partial [Homo sapiens]	1002	28944	72	53	40	32	84.3	689	1	1	0	749.346	1496.68	2	1496.67	0.0065	1	58.4	1.5e-05	K	KWQEEMELYR	Q
11	gi|178775	proapolipoprotein, partial [Homo sapiens]	1002	28944	72	53	40	32	84.3	703	1	1	1	753.424	1504.83	2	1504.85	-0.0169	1	42.31	0.11	R	VKDLATVYVDVLK	D
11	gi|178775	proapolipoprotein, partial [Homo sapiens]	1002	28944	72	53	40	32	84.3	747	1	1	0	769.388	1536.76	2	1536.76	0.0032	1	41.64	0.00087	K	AKVQPYLDDFQK	K
11	gi|178775	proapolipoprotein, partial [Homo sapiens]	1002	28944	72	53	40	32	84.3	763	1	1	1	774.936	1547.86	2	1547.86	0.0007	1	53.94	0.00056	R	VKDLATVYVDVLK	D
11	gi|178775	proapolipoprotein, partial [Homo sapiens]	1002	28944	72	53	40	32	84.3	777	1	1	0	779.413	1556.81	2	1556.81	0.0021	1	55.66	0.0067	K	VSFLSALEEYTKK	L
11	gi|178775	proapolipoprotein, partial [Homo sapiens]	1002	28944	72	53	40	32	84.3	840	1	1	0	800.914	1599.81	2	1599.81	-0.0012	1	21.15	0.01	K	VSFLSALEEYTKK	L
11	gi|178775	proapolipoprotein, partial [Homo sapiens]	1002	28944	72	53	40	32	84.3	865	1	1	0	806.898	1611.78	2	1611.78	0.0032	0	73.95	6.5e-07	K	LLDNWDSVTSTFSK	L
11	gi|178775	proapolipoprotein, partial [Homo sapiens]	1002	28944	72	53	40	32	84.3	922	1	1	0	828.4	1654.79	2	1654.78	0.002	0	45.91	0.0002	K	LLDNWDSVTSTFSK	L
11	gi|178775	proapolipoprotein, partial [Homo sapiens]	1002	28944	72	53	40	32	84.3	974	1	1	1	847.442	1692.87	2	1692.87	0.0014	1	38.48	0.13	K	DLATVYVDVLKDSGR	D
11	gi|178775	proapolipoprotein, partial [Homo sapiens]	1002	28944	72	53	40	32	84.3	1032	1	1	1	868.947	1735.88	2	1735.87	0.005	1	7.96	0.49	K	DLATVYVDVLKDSGR	D
11	gi|178775	proapolipoprotein, partial [Homo sapiens]	1002	28944	72	53	40	32	84.3	1311	1	1	0	966.971	1931.93	2	1931.93	0.001	0	54.94	2.2e-05	R	EQLGPVTQEFWDNLEK	E
11	gi|178775	proapolipoprotein, partial [Homo sapiens]	1002	28944	72	53	40	32	84.3	1336	1	1	0	651.331	1950.97	3	1950.98	-0.0124	1	40.38	0.00081	K	LHELQEKLSPLGEEMR	D
11	gi|178775	proapolipoprotein, partial [Homo sapiens]	1002	28944	72	53	40	32	84.3	1337	1	1	0	976.495	1950.97	2	1950.98	-0.0082	1	61.28	0.0019	K	LHELQEKLSPLGEEMR	D
11	gi|178775	proapolipoprotein, partial [Homo sapiens]	1002	28944	72	53	40	32	84.3	1352	1	1	0	984.495	1966.97	2	1966.97	0	1	37.85	0.23	K	LLDNWDSVTSTFSKLR	E
11	gi|178775	proapolipoprotein, partial [Homo sapiens]	1002	28944	72	53	40	32	84.3	1359	1	1	0	988.476	1974.94	2	1974.93	0.0041	0	26.3	0.0034	R	EQLGPVTQEFWDNLEK	E
11	gi|178775	proapolipoprotein, partial [Homo sapiens]	1002	28944	72	53	40	32	84.3	1377	1	1	0	998.002	1993.99	2	1993.99	0.0012	1	26.87	0.0068	K	LHELQEKLSPLGEEMR	D
11	gi|178775	proapolipoprotein, partial [Homo sapiens]	1002	28944	72	53	40	32	84.3	1384	1	1	1	1004.03	2006.04	2	2006.04	-0.001	2	21.85	0.012	R	VKDLATVYVDVLKDSGR	D
11	gi|178775	proapolipoprotein, partial [Homo sapiens]	1002	28944	72	53	40	32	84.3	1406	1	1	1	1020.52	2039.03	2	2039.03	0.0013	1	34.26	0.001	R	DYVSQFEGSALGKQLNLK	L
11	gi|178775	proapolipoprotein, partial [Homo sapiens]	1002	28944	72	53	40	32	84.3	1435	1	1	0	691.021	2070.04	3	2070.04	0.0033	1	43.1	0.11	R	LAEYHAKATEHLSTLSEK	A
11	gi|178775	proapolipoprotein, partial [Homo sapiens]	1002	28944	72	53	40	32	84.3	1451	1	1	1	1042.03	2082.04	2	2082.04	0.0025	1	19.9	0.094	R	DYVSQFEGSALGKQLNLK	L
11	gi|178775	proapolipoprotein, partial [Homo sapiens]	1002	28944	72	53	40	32	84.3	1572	1	1	0	734.712	2201.12	3	2201.11	0.0037	1	47.42	5.6e-05	K	LREQLGPVTQEFWDNLEK	E
11	gi|178775	proapolipoprotein, partial [Homo sapiens]	1002	28944	72	53	40	32	84.3	1609	1	1	0	1126.07	2250.12	2	2250.12	0.0054	2	35.14	0.42	K	DLEEVKAKVQPYLDDFQK	K
11	gi|178775	proapolipoprotein, partial [Homo sapiens]	1002	28944	72	53	40	32	84.3	1610	1	1	0	751.056	2250.15	3	2250.14	0.0039	2	50.76	0.018	R	QKLHELQEKLSPLGEEMR	D
11	gi|178775	proapolipoprotein, partial [Homo sapiens]	1002	28944	72	53	40	32	84.3	1613	1	1	1	1126.58	2251.15	2	2251.15	0.003	1	43.21	0.00015	K	QLNLKLLDNWDSVTSTFSK	L
11	gi|178775	proapolipoprotein, partial [Homo sapiens]	1002	28944	72	53	40	32	84.3	1614	1	1	0	751.402	2251.18	3	2251.18	0.004	1	33.67	0.0027	K	ATEHLSTLSEKAKPALEDLR	Q
11	gi|178775	proapolipoprotein, partial [Homo sapiens]	1002	28944	72	53	40	32	84.3	1653	1	1	0	765.392	2293.15	3	2293.15	0.0046	2	38.31	0.0063	R	QKLHELQEKLSPLGEEMR	D
11	gi|178775	proapolipoprotein, partial [Homo sapiens]	1002	28944	72	53	40	32	84.3	1654	1	1	0	765.737	2294.19	3	2294.19	0.0017	1	30.7	0.14	K	ATEHLSTLSEKAKPALEDLR	Q
11	gi|178775	proapolipoprotein, partial [Homo sapiens]	1002	28944	72	53	40	32	84.3	1655	1	1	0	765.738	2294.19	3	2294.19	0.0056	1	35.22	0.0014	K	ATEHLSTLSEKAKPALEDLR	Q
11	gi|178775	proapolipoprotein, partial [Homo sapiens]	1002	28944	72	53	40	32	84.3	1697	1	1	0	780.072	2337.19	3	2337.19	0.0021	1	21.59	0.019	K	ATEHLSTLSEKAKPALEDLR	Q
11	gi|178775	proapolipoprotein, partial [Homo sapiens]	1002	28944	72	53	40	32	84.3	1866	1	1	1	855.454	2563.34	3	2563.34	0.0004	2	38.36	0.00025	K	QLNLKLLDNWDSVTSTFSKLR	E
11	gi|178775	proapolipoprotein, partial [Homo sapiens]	1002	28944	72	53	40	32	84.3	1921	1	1	0	873.43	2617.27	3	2617.27	0.0022	1	69.93	5.2e-07	R	EQLGPVTQEFWDNLEKETEGLR	Q
11	gi|178775	proapolipoprotein, partial [Homo sapiens]	1002	28944	72	53	40	32	84.3	1937	1	1	0	881.14	2640.4	3	2640.41	-0.0054	1	30.71	0.0013	R	QGLLPVLESFKVSFLSALEEYTK	K
11	gi|178775	proapolipoprotein, partial [Homo sapiens]	1002	28944	72	53	40	32	84.3	1950	1	1	0	1331.14	2660.27	2	2660.27	0.0012	1	53.14	1.2e-05	R	EQLGPVTQEFWDNLEKETEGLR	Q
11	gi|178775	proapolipoprotein, partial [Homo sapiens]	1002	28944	72	53	40	32	84.3	1951	1	1	0	1331.14	2660.27	2	2660.27	0.0024	1	67.26	1.2e-06	R	EQLGPVTQEFWDNLEKETEGLR	Q
11	gi|178775	proapolipoprotein, partial [Homo sapiens]	1002	28944	72	53	40	32	84.3	1952	1	1	0	887.766	2660.28	3	2660.27	0.0035	1	41.86	0.00012	R	EQLGPVTQEFWDNLEKETEGLR	Q
11	gi|178775	proapolipoprotein, partial [Homo sapiens]	1002	28944	72	53	40	32	84.3	1953	1	1	0	887.767	2660.28	3	2660.27	0.0086	1	30.4	0.68	R	EQLGPVTQEFWDNLEKETEGLR	Q
11	gi|178775	proapolipoprotein, partial [Homo sapiens]	1002	28944	72	53	40	32	84.3	1981	1	1	0	902.101	2703.28	3	2703.28	0.0027	1	3.99	0.42	R	EQLGPVTQEFWDNLEKETEGLR	Q
11	gi|178775	proapolipoprotein, partial [Homo sapiens]	1002	28944	72	53	40	32	84.3	2036	1	1	0	938.176	2811.5	3	2811.51	-0.0011	2	14.68	0.69	R	QGLLPVLESFKVSFLSALEEYTKK	L
11	gi|178775	proapolipoprotein, partial [Homo sapiens]	1002	28944	72	53	40	32	84.3	2088	1	1	0	722.623	2886.46	4	2886.45	0.0101	2	49.94	5.3e-05	K	LREQLGPVTQEFWDNLEKETEGLR	Q
11	gi|178775	proapolipoprotein, partial [Homo sapiens]	1002	28944	72	53	40	32	84.3	2166	1	1	0	777.658	3106.6	4	3106.6	-0.0029	2	42.3	0.037	R	LAEYHAKATEHLSTLSEKAKPALEDLR	Q
11	gi|178775	proapolipoprotein, partial [Homo sapiens]	1002	28944	72	53	40	32	84.3	2178	1	1	0	788.411	3149.61	4	3149.61	0.0028	2	21.23	0.21	R	LAEYHAKATEHLSTLSEKAKPALEDLR	Q
11	gi|178775	proapolipoprotein, partial [Homo sapiens]	1002	28944	72	53	40	32	84.3	2203	1	1	0	806.142	3220.54	4	3220.53	0.0043	2	14.28	0.046	R	EQLGPVTQEFWDNLEKETEGLRQEMSK	D
11	gi|178775	proapolipoprotein, partial [Homo sapiens]	1002	28944	72	53	40	32	84.3	2204	1	1	0	1074.52	3220.54	3	3220.53	0.0045	2	12.75	0.064	R	EQLGPVTQEFWDNLEKETEGLRQEMSK	D
11	gi|178775	proapolipoprotein, partial [Homo sapiens]	1002	28944	72	53	40	32	84.3	2216	1	1	0	1088.85	3263.54	3	3263.54	0.0012	2	31.72	0.0049	R	EQLGPVTQEFWDNLEKETEGLRQEMSK	D
11	gi|178775	proapolipoprotein, partial [Homo sapiens]	1002	28944	72	53	40	32	84.3	2217	1	1	0	1088.86	3263.54	3	3263.54	0.0033	2	38.2	0.00084	R	EQLGPVTQEFWDNLEKETEGLRQEMSK	D
11	gi|178775	proapolipoprotein, partial [Homo sapiens]	1002	28944	72	53	40	32	84.3	2222	1	1	0	1103.19	3306.55	3	3306.55	0.0046	2	9.49	0.26	R	EQLGPVTQEFWDNLEKETEGLRQEMSK	D
12	gi|2914175	Chain A, Crystal Structure Of Human Apolipoprotein A-I	902	23389	63	48	34	26	88.1	89	1	0	0	470.248	938.482	2	938.482	-0.0003	0	15.88	0.33	K	LHELQEK	L
12	gi|2914175	Chain A, Crystal Structure Of Human Apolipoprotein A-I	902	23389	63	48	34	26	88.1	150	1	0	0	516.264	1030.51	2	1030.51	0.0023	0	36.83	0.0022	K	LSPLGEEMR	D
12	gi|2914175	Chain A, Crystal Structure Of Human Apolipoprotein A-I	902	23389	63	48	34	26	88.1	201	1	0	0	549.799	1097.58	2	1097.58	0.0004	0	29.5	0.015	K	AKPALEDLR	Q
12	gi|2914175	Chain A, Crystal Structure Of Human Apolipoprotein A-I	902	23389	63	48	34	26	88.1	305	1	0	0	600.822	1199.63	2	1199.63	0.0026	1	57.74	0.0047	R	LEALKENGGAR	L
12	gi|2914175	Chain A, Crystal Structure Of Human Apolipoprotein A-I	902	23389	63	48	34	26	88.1	354	1	0	0	615.859	1229.7	2	1229.7	0.0007	0	34.17	0.023	R	QGLLPVLESFK	V
12	gi|2914175	Chain A, Crystal Structure Of Human Apolipoprotein A-I	902	23389	63	48	34	26	88.1	355	1	0	0	615.859	1229.7	2	1229.7	0.0017	0	50.93	0.00024	R	QGLLPVLESFK	V
12	gi|2914175	Chain A, Crystal Structure Of Human Apolipoprotein A-I	902	23389	63	48	34	26	88.1	366	1	0	0	619.829	1237.64	2	1237.64	0.0012	1	24.03	0.057	R	QKLHELQEK	L
12	gi|2914175	Chain A, Crystal Structure Of Human Apolipoprotein A-I	902	23389	63	48	34	26	88.1	373	2	0	0	622.322	1242.63	2	1242.63	-0.0028	1	22.37	1.3	R	LEALKENGGAR	L
12	gi|2914175	Chain A, Crystal Structure Of Human Apolipoprotein A-I	902	23389	63	48	34	26	88.1	384	1	0	0	626.816	1251.62	2	1251.61	0.0031	0	22.43	0.13	K	VQPYLDDFQK	K
12	gi|2914175	Chain A, Crystal Structure Of Human Apolipoprotein A-I	902	23389	63	48	34	26	88.1	389	1	0	0	629.818	1257.62	2	1257.62	0.0014	0	35.76	0.0064	K	ATEHLSTLSEK	A
12	gi|2914175	Chain A, Crystal Structure Of Human Apolipoprotein A-I	902	23389	63	48	34	26	88.1	408	1	0	0	637.362	1272.71	2	1272.71	0.0019	0	35.8	0.0017	R	QGLLPVLESFK	V
12	gi|2914175	Chain A, Crystal Structure Of Human Apolipoprotein A-I	902	23389	63	48	34	26	88.1	429	1	0	0	642.293	1282.57	2	1282.57	0.0067	0	33.59	0.0057	K	WQEEMELYR	Q
12	gi|2914175	Chain A, Crystal Structure Of Human Apolipoprotein A-I	902	23389	63	48	34	26	88.1	452	1	0	0	651.33	1300.65	2	1300.64	0.0043	0	32.15	0.0066	R	THLAPYSDELR	Q
12	gi|2914175	Chain A, Crystal Structure Of Human Apolipoprotein A-I	902	23389	63	48	34	26	88.1	504	1	0	0	672.83	1343.65	2	1343.65	-0.0009	0	45.32	0.00031	R	THLAPYSDELR	Q
12	gi|2914175	Chain A, Crystal Structure Of Human Apolipoprotein A-I	902	23389	63	48	34	26	88.1	546	1	0	0	689.832	1377.65	2	1377.64	0.0045	1	21.42	0.036	R	QEMSKDLEEVK	A
12	gi|2914175	Chain A, Crystal Structure Of Human Apolipoprotein A-I	902	23389	63	48	34	26	88.1	555	1	0	0	693.864	1385.71	2	1385.71	0.0058	0	64.35	4.7e-06	K	VSFLSALEEYTK	K
12	gi|2914175	Chain A, Crystal Structure Of Human Apolipoprotein A-I	902	23389	63	48	34	26	88.1	581	1	0	0	706.339	1410.66	2	1410.66	0.0031	1	56.24	0.00012	K	KWQEEMELYR	Q
12	gi|2914175	Chain A, Crystal Structure Of Human Apolipoprotein A-I	902	23389	63	48	34	26	88.1	602	1	0	0	712.364	1422.71	2	1422.71	-0.0009	1	43.64	0.002	K	VQPYLDDFQKK	W
12	gi|2914175	Chain A, Crystal Structure Of Human Apolipoprotein A-I	902	23389	63	48	34	26	88.1	606	1	0	0	715.365	1428.72	2	1428.71	0.0026	0	56.23	1.8e-05	K	VSFLSALEEYTK	K
12	gi|2914175	Chain A, Crystal Structure Of Human Apolipoprotein A-I	902	23389	63	48	34	26	88.1	630	1	0	0	727.841	1453.67	2	1453.67	0.0021	1	34.68	0.0067	K	KWQEEMELYR	Q
12	gi|2914175	Chain A, Crystal Structure Of Human Apolipoprotein A-I	902	23389	63	48	34	26	88.1	631	1	0	0	727.842	1453.67	2	1453.67	0.0027	1	43.6	0.0005	K	KWQEEMELYR	Q
12	gi|2914175	Chain A, Crystal Structure Of Human Apolipoprotein A-I	902	23389	63	48	34	26	88.1	651	1	0	0	734.401	1466.79	2	1466.78	0.0041	1	17.14	0.94	K	VEPLRAELQEGAR	Q
12	gi|2914175	Chain A, Crystal Structure Of Human Apolipoprotein A-I	902	23389	63	48	34	26	88.1	686	1	0	0	747.885	1493.75	2	1493.75	0.0032	1	26.26	0.0072	K	AKVQPYLDDFQK	K
12	gi|2914175	Chain A, Crystal Structure Of Human Apolipoprotein A-I	902	23389	63	48	34	26	88.1	689	1	0	0	749.346	1496.68	2	1496.67	0.0065	1	58.4	1.5e-05	K	KWQEEMELYR	Q
12	gi|2914175	Chain A, Crystal Structure Of Human Apolipoprotein A-I	902	23389	63	48	34	26	88.1	747	1	0	0	769.388	1536.76	2	1536.76	0.0032	1	41.64	0.00087	K	AKVQPYLDDFQK	K
12	gi|2914175	Chain A, Crystal Structure Of Human Apolipoprotein A-I	902	23389	63	48	34	26	88.1	777	1	0	0	779.413	1556.81	2	1556.81	0.0021	1	55.66	0.0067	K	VSFLSALEEYTKK	L
12	gi|2914175	Chain A, Crystal Structure Of Human Apolipoprotein A-I	902	23389	63	48	34	26	88.1	840	1	0	0	800.914	1599.81	2	1599.81	-0.0012	1	21.15	0.01	K	VSFLSALEEYTKK	L
12	gi|2914175	Chain A, Crystal Structure Of Human Apolipoprotein A-I	902	23389	63	48	34	26	88.1	865	1	0	0	806.898	1611.78	2	1611.78	0.0032	0	73.95	6.5e-07	K	LLDNWDSVTSTFSK	L
12	gi|2914175	Chain A, Crystal Structure Of Human Apolipoprotein A-I	902	23389	63	48	34	26	88.1	922	1	0	0	828.4	1654.79	2	1654.78	0.002	0	45.91	0.0002	K	LLDNWDSVTSTFSK	L
12	gi|2914175	Chain A, Crystal Structure Of Human Apolipoprotein A-I	902	23389	63	48	34	26	88.1	1268	1	0	1	948.99	1895.97	2	1895.96	0.0032	1	44.6	8.1e-05	M	LKLLDNWDSVTSTFSK	L
12	gi|2914175	Chain A, Crystal Structure Of Human Apolipoprotein A-I	902	23389	63	48	34	26	88.1	1311	1	0	0	966.971	1931.93	2	1931.93	0.001	0	54.94	2.2e-05	R	EQLGPVTQEFWDNLEK	E
12	gi|2914175	Chain A, Crystal Structure Of Human Apolipoprotein A-I	902	23389	63	48	34	26	88.1	1315	1	0	1	970.492	1938.97	2	1938.97	0.0011	1	37	0.00091	M	LKLLDNWDSVTSTFSK	L
12	gi|2914175	Chain A, Crystal Structure Of Human Apolipoprotein A-I	902	23389	63	48	34	26	88.1	1336	1	0	0	651.331	1950.97	3	1950.98	-0.0124	1	40.38	0.00081	K	LHELQEKLSPLGEEMR	D
12	gi|2914175	Chain A, Crystal Structure Of Human Apolipoprotein A-I	902	23389	63	48	34	26	88.1	1337	1	0	0	976.495	1950.97	2	1950.98	-0.0082	1	61.28	0.0019	K	LHELQEKLSPLGEEMR	D
12	gi|2914175	Chain A, Crystal Structure Of Human Apolipoprotein A-I	902	23389	63	48	34	26	88.1	1352	1	0	0	984.495	1966.97	2	1966.97	0	1	37.85	0.23	K	LLDNWDSVTSTFSKLR	E
12	gi|2914175	Chain A, Crystal Structure Of Human Apolipoprotein A-I	902	23389	63	48	34	26	88.1	1359	1	0	0	988.476	1974.94	2	1974.93	0.0041	0	26.3	0.0034	R	EQLGPVTQEFWDNLEK	E
12	gi|2914175	Chain A, Crystal Structure Of Human Apolipoprotein A-I	902	23389	63	48	34	26	88.1	1377	1	0	0	998.002	1993.99	2	1993.99	0.0012	1	26.87	0.0068	K	LHELQEKLSPLGEEMR	D
12	gi|2914175	Chain A, Crystal Structure Of Human Apolipoprotein A-I	902	23389	63	48	34	26	88.1	1435	1	0	0	691.021	2070.04	3	2070.04	0.0033	1	43.1	0.11	R	LAEYHAKATEHLSTLSEK	A
12	gi|2914175	Chain A, Crystal Structure Of Human Apolipoprotein A-I	902	23389	63	48	34	26	88.1	1572	1	0	0	734.712	2201.12	3	2201.11	0.0037	1	47.42	5.6e-05	K	LREQLGPVTQEFWDNLEK	E
12	gi|2914175	Chain A, Crystal Structure Of Human Apolipoprotein A-I	902	23389	63	48	34	26	88.1	1581	1	0	1	1105.08	2208.15	2	2208.15	-0.0022	2	8.55	0.42	M	LKLLDNWDSVTSTFSKLR	E
12	gi|2914175	Chain A, Crystal Structure Of Human Apolipoprotein A-I	902	23389	63	48	34	26	88.1	1609	1	0	0	1126.07	2250.12	2	2250.12	0.0054	2	35.14	0.42	K	DLEEVKAKVQPYLDDFQK	K
12	gi|2914175	Chain A, Crystal Structure Of Human Apolipoprotein A-I	902	23389	63	48	34	26	88.1	1610	1	0	0	751.056	2250.15	3	2250.14	0.0039	2	50.76	0.018	R	QKLHELQEKLSPLGEEMR	D
12	gi|2914175	Chain A, Crystal Structure Of Human Apolipoprotein A-I	902	23389	63	48	34	26	88.1	1614	1	0	0	751.402	2251.18	3	2251.18	0.004	1	33.67	0.0027	K	ATEHLSTLSEKAKPALEDLR	Q
12	gi|2914175	Chain A, Crystal Structure Of Human Apolipoprotein A-I	902	23389	63	48	34	26	88.1	1653	1	0	0	765.392	2293.15	3	2293.15	0.0046	2	38.31	0.0063	R	QKLHELQEKLSPLGEEMR	D
12	gi|2914175	Chain A, Crystal Structure Of Human Apolipoprotein A-I	902	23389	63	48	34	26	88.1	1654	1	0	0	765.737	2294.19	3	2294.19	0.0017	1	30.7	0.14	K	ATEHLSTLSEKAKPALEDLR	Q
12	gi|2914175	Chain A, Crystal Structure Of Human Apolipoprotein A-I	902	23389	63	48	34	26	88.1	1655	1	0	0	765.738	2294.19	3	2294.19	0.0056	1	35.22	0.0014	K	ATEHLSTLSEKAKPALEDLR	Q
12	gi|2914175	Chain A, Crystal Structure Of Human Apolipoprotein A-I	902	23389	63	48	34	26	88.1	1697	1	0	0	780.072	2337.19	3	2337.19	0.0021	1	21.59	0.019	K	ATEHLSTLSEKAKPALEDLR	Q
12	gi|2914175	Chain A, Crystal Structure Of Human Apolipoprotein A-I	902	23389	63	48	34	26	88.1	1921	1	0	0	873.43	2617.27	3	2617.27	0.0022	1	69.93	5.2e-07	R	EQLGPVTQEFWDNLEKETEGLR	Q
12	gi|2914175	Chain A, Crystal Structure Of Human Apolipoprotein A-I	902	23389	63	48	34	26	88.1	1937	1	0	0	881.14	2640.4	3	2640.41	-0.0054	1	30.71	0.0013	R	QGLLPVLESFKVSFLSALEEYTK	K
12	gi|2914175	Chain A, Crystal Structure Of Human Apolipoprotein A-I	902	23389	63	48	34	26	88.1	1950	1	0	0	1331.14	2660.27	2	2660.27	0.0012	1	53.14	1.2e-05	R	EQLGPVTQEFWDNLEKETEGLR	Q
12	gi|2914175	Chain A, Crystal Structure Of Human Apolipoprotein A-I	902	23389	63	48	34	26	88.1	1951	1	0	0	1331.14	2660.27	2	2660.27	0.0024	1	67.26	1.2e-06	R	EQLGPVTQEFWDNLEKETEGLR	Q
12	gi|2914175	Chain A, Crystal Structure Of Human Apolipoprotein A-I	902	23389	63	48	34	26	88.1	1952	1	0	0	887.766	2660.28	3	2660.27	0.0035	1	41.86	0.00012	R	EQLGPVTQEFWDNLEKETEGLR	Q
12	gi|2914175	Chain A, Crystal Structure Of Human Apolipoprotein A-I	902	23389	63	48	34	26	88.1	1953	1	0	0	887.767	2660.28	3	2660.27	0.0086	1	30.4	0.68	R	EQLGPVTQEFWDNLEKETEGLR	Q
12	gi|2914175	Chain A, Crystal Structure Of Human Apolipoprotein A-I	902	23389	63	48	34	26	88.1	1981	1	0	0	902.101	2703.28	3	2703.28	0.0027	1	3.99	0.42	R	EQLGPVTQEFWDNLEKETEGLR	Q
12	gi|2914175	Chain A, Crystal Structure Of Human Apolipoprotein A-I	902	23389	63	48	34	26	88.1	2036	1	0	0	938.176	2811.5	3	2811.51	-0.0011	2	14.68	0.69	R	QGLLPVLESFKVSFLSALEEYTKK	L
12	gi|2914175	Chain A, Crystal Structure Of Human Apolipoprotein A-I	902	23389	63	48	34	26	88.1	2088	1	0	0	722.623	2886.46	4	2886.45	0.0101	2	49.94	5.3e-05	K	LREQLGPVTQEFWDNLEKETEGLR	Q
12	gi|2914175	Chain A, Crystal Structure Of Human Apolipoprotein A-I	902	23389	63	48	34	26	88.1	2166	1	0	0	777.658	3106.6	4	3106.6	-0.0029	2	42.3	0.037	R	LAEYHAKATEHLSTLSEKAKPALEDLR	Q
12	gi|2914175	Chain A, Crystal Structure Of Human Apolipoprotein A-I	902	23389	63	48	34	26	88.1	2178	1	0	0	788.411	3149.61	4	3149.61	0.0028	2	21.23	0.21	R	LAEYHAKATEHLSTLSEKAKPALEDLR	Q
12	gi|2914175	Chain A, Crystal Structure Of Human Apolipoprotein A-I	902	23389	63	48	34	26	88.1	2203	1	0	0	806.142	3220.54	4	3220.53	0.0043	2	14.28	0.046	R	EQLGPVTQEFWDNLEKETEGLRQEMSK	D
12	gi|2914175	Chain A, Crystal Structure Of Human Apolipoprotein A-I	902	23389	63	48	34	26	88.1	2204	1	0	0	1074.52	3220.54	3	3220.53	0.0045	2	12.75	0.064	R	EQLGPVTQEFWDNLEKETEGLRQEMSK	D
12	gi|2914175	Chain A, Crystal Structure Of Human Apolipoprotein A-I	902	23389	63	48	34	26	88.1	2216	1	0	0	1088.85	3263.54	3	3263.54	0.0012	2	31.72	0.0049	R	EQLGPVTQEFWDNLEKETEGLRQEMSK	D
12	gi|2914175	Chain A, Crystal Structure Of Human Apolipoprotein A-I	902	23389	63	48	34	26	88.1	2217	1	0	0	1088.86	3263.54	3	3263.54	0.0033	2	38.2	0.00084	R	EQLGPVTQEFWDNLEKETEGLRQEMSK	D
12	gi|2914175	Chain A, Crystal Structure Of Human Apolipoprotein A-I	902	23389	63	48	34	26	88.1	2222	1	0	0	1103.19	3306.55	3	3306.55	0.0046	2	9.49	0.26	R	EQLGPVTQEFWDNLEKETEGLRQEMSK	D
13	gi|119587681	apolipoprotein A-I, isoform CRA_b, partial [Homo sapiens]	786	23454	52	38	29	23	73.6	89	1	0	0	470.248	938.482	2	938.482	-0.0003	0	15.88	0.33	K	LHELQEK	L
13	gi|119587681	apolipoprotein A-I, isoform CRA_b, partial [Homo sapiens]	786	23454	52	38	29	23	73.6	150	1	0	0	516.264	1030.51	2	1030.51	0.0023	0	36.83	0.0022	K	LSPLGEEMR	D
13	gi|119587681	apolipoprotein A-I, isoform CRA_b, partial [Homo sapiens]	786	23454	52	38	29	23	73.6	362	1	0	1	618.349	1234.68	2	1234.68	0.0023	0	37.75	0.002	K	DLATVYVDVLK	D
13	gi|119587681	apolipoprotein A-I, isoform CRA_b, partial [Homo sapiens]	786	23454	52	38	29	23	73.6	366	1	0	0	619.829	1237.64	2	1237.64	0.0012	1	24.03	0.057	R	QKLHELQEK	L
13	gi|119587681	apolipoprotein A-I, isoform CRA_b, partial [Homo sapiens]	786	23454	52	38	29	23	73.6	384	1	0	0	626.816	1251.62	2	1251.61	0.0031	0	22.43	0.13	K	VQPYLDDFQK	K
13	gi|119587681	apolipoprotein A-I, isoform CRA_b, partial [Homo sapiens]	786	23454	52	38	29	23	73.6	423	1	0	1	639.852	1277.69	2	1277.69	0.0031	0	8.92	0.15	K	DLATVYVDVLK	D
13	gi|119587681	apolipoprotein A-I, isoform CRA_b, partial [Homo sapiens]	786	23454	52	38	29	23	73.6	429	1	0	0	642.293	1282.57	2	1282.57	0.0067	0	33.59	0.0057	K	WQEEMELYR	Q
13	gi|119587681	apolipoprotein A-I, isoform CRA_b, partial [Homo sapiens]	786	23454	52	38	29	23	73.6	452	1	0	0	651.33	1300.65	2	1300.64	0.0043	0	32.15	0.0066	R	THLAPYSDELR	Q
13	gi|119587681	apolipoprotein A-I, isoform CRA_b, partial [Homo sapiens]	786	23454	52	38	29	23	73.6	504	1	0	0	672.83	1343.65	2	1343.65	-0.0009	0	45.32	0.00031	R	THLAPYSDELR	Q
13	gi|119587681	apolipoprotein A-I, isoform CRA_b, partial [Homo sapiens]	786	23454	52	38	29	23	73.6	546	1	0	0	689.832	1377.65	2	1377.64	0.0045	1	21.42	0.036	R	QEMSKDLEEVK	A
13	gi|119587681	apolipoprotein A-I, isoform CRA_b, partial [Homo sapiens]	786	23454	52	38	29	23	73.6	565	1	0	1	700.842	1399.67	2	1399.66	0.0071	0	54.28	8.1e-06	R	DYVSQFEGSALGK	Q
13	gi|119587681	apolipoprotein A-I, isoform CRA_b, partial [Homo sapiens]	786	23454	52	38	29	23	73.6	581	1	0	0	706.339	1410.66	2	1410.66	0.0031	1	56.24	0.00012	K	KWQEEMELYR	Q
13	gi|119587681	apolipoprotein A-I, isoform CRA_b, partial [Homo sapiens]	786	23454	52	38	29	23	73.6	602	1	0	0	712.364	1422.71	2	1422.71	-0.0009	1	43.64	0.002	K	VQPYLDDFQKK	W
13	gi|119587681	apolipoprotein A-I, isoform CRA_b, partial [Homo sapiens]	786	23454	52	38	29	23	73.6	630	1	0	0	727.841	1453.67	2	1453.67	0.0021	1	34.68	0.0067	K	KWQEEMELYR	Q
13	gi|119587681	apolipoprotein A-I, isoform CRA_b, partial [Homo sapiens]	786	23454	52	38	29	23	73.6	631	1	0	0	727.842	1453.67	2	1453.67	0.0027	1	43.6	0.0005	K	KWQEEMELYR	Q
13	gi|119587681	apolipoprotein A-I, isoform CRA_b, partial [Homo sapiens]	786	23454	52	38	29	23	73.6	651	1	0	0	734.401	1466.79	2	1466.78	0.0041	1	17.14	0.94	K	VEPLRAELQEGAR	Q
13	gi|119587681	apolipoprotein A-I, isoform CRA_b, partial [Homo sapiens]	786	23454	52	38	29	23	73.6	686	1	0	0	747.885	1493.75	2	1493.75	0.0032	1	26.26	0.0072	K	AKVQPYLDDFQK	K
13	gi|119587681	apolipoprotein A-I, isoform CRA_b, partial [Homo sapiens]	786	23454	52	38	29	23	73.6	689	1	0	0	749.346	1496.68	2	1496.67	0.0065	1	58.4	1.5e-05	K	KWQEEMELYR	Q
13	gi|119587681	apolipoprotein A-I, isoform CRA_b, partial [Homo sapiens]	786	23454	52	38	29	23	73.6	703	1	0	1	753.424	1504.83	2	1504.85	-0.0169	1	42.31	0.11	R	VKDLATVYVDVLK	D
13	gi|119587681	apolipoprotein A-I, isoform CRA_b, partial [Homo sapiens]	786	23454	52	38	29	23	73.6	747	1	0	0	769.388	1536.76	2	1536.76	0.0032	1	41.64	0.00087	K	AKVQPYLDDFQK	K
13	gi|119587681	apolipoprotein A-I, isoform CRA_b, partial [Homo sapiens]	786	23454	52	38	29	23	73.6	763	1	0	1	774.936	1547.86	2	1547.86	0.0007	1	53.94	0.00056	R	VKDLATVYVDVLK	D
13	gi|119587681	apolipoprotein A-I, isoform CRA_b, partial [Homo sapiens]	786	23454	52	38	29	23	73.6	865	1	0	0	806.898	1611.78	2	1611.78	0.0032	0	73.95	6.5e-07	K	LLDNWDSVTSTFSK	L
13	gi|119587681	apolipoprotein A-I, isoform CRA_b, partial [Homo sapiens]	786	23454	52	38	29	23	73.6	922	1	0	0	828.4	1654.79	2	1654.78	0.002	0	45.91	0.0002	K	LLDNWDSVTSTFSK	L
13	gi|119587681	apolipoprotein A-I, isoform CRA_b, partial [Homo sapiens]	786	23454	52	38	29	23	73.6	974	1	0	1	847.442	1692.87	2	1692.87	0.0014	1	38.48	0.13	K	DLATVYVDVLKDSGR	D
13	gi|119587681	apolipoprotein A-I, isoform CRA_b, partial [Homo sapiens]	786	23454	52	38	29	23	73.6	1032	1	0	1	868.947	1735.88	2	1735.87	0.005	1	7.96	0.49	K	DLATVYVDVLKDSGR	D
13	gi|119587681	apolipoprotein A-I, isoform CRA_b, partial [Homo sapiens]	786	23454	52	38	29	23	73.6	1311	1	0	0	966.971	1931.93	2	1931.93	0.001	0	54.94	2.2e-05	R	EQLGPVTQEFWDNLEK	E
13	gi|119587681	apolipoprotein A-I, isoform CRA_b, partial [Homo sapiens]	786	23454	52	38	29	23	73.6	1336	1	0	0	651.331	1950.97	3	1950.98	-0.0124	1	40.38	0.00081	K	LHELQEKLSPLGEEMR	D
13	gi|119587681	apolipoprotein A-I, isoform CRA_b, partial [Homo sapiens]	786	23454	52	38	29	23	73.6	1337	1	0	0	976.495	1950.97	2	1950.98	-0.0082	1	61.28	0.0019	K	LHELQEKLSPLGEEMR	D
13	gi|119587681	apolipoprotein A-I, isoform CRA_b, partial [Homo sapiens]	786	23454	52	38	29	23	73.6	1352	1	0	0	984.495	1966.97	2	1966.97	0	1	37.85	0.23	K	LLDNWDSVTSTFSKLR	E
13	gi|119587681	apolipoprotein A-I, isoform CRA_b, partial [Homo sapiens]	786	23454	52	38	29	23	73.6	1359	1	0	0	988.476	1974.94	2	1974.93	0.0041	0	26.3	0.0034	R	EQLGPVTQEFWDNLEK	E
13	gi|119587681	apolipoprotein A-I, isoform CRA_b, partial [Homo sapiens]	786	23454	52	38	29	23	73.6	1377	1	0	0	998.002	1993.99	2	1993.99	0.0012	1	26.87	0.0068	K	LHELQEKLSPLGEEMR	D
13	gi|119587681	apolipoprotein A-I, isoform CRA_b, partial [Homo sapiens]	786	23454	52	38	29	23	73.6	1384	1	0	1	1004.03	2006.04	2	2006.04	-0.001	2	21.85	0.012	R	VKDLATVYVDVLKDSGR	D
13	gi|119587681	apolipoprotein A-I, isoform CRA_b, partial [Homo sapiens]	786	23454	52	38	29	23	73.6	1406	1	0	1	1020.52	2039.03	2	2039.03	0.0013	1	34.26	0.001	R	DYVSQFEGSALGKQLNLK	L
13	gi|119587681	apolipoprotein A-I, isoform CRA_b, partial [Homo sapiens]	786	23454	52	38	29	23	73.6	1451	1	0	1	1042.03	2082.04	2	2082.04	0.0025	1	19.9	0.094	R	DYVSQFEGSALGKQLNLK	L
13	gi|119587681	apolipoprotein A-I, isoform CRA_b, partial [Homo sapiens]	786	23454	52	38	29	23	73.6	1572	1	0	0	734.712	2201.12	3	2201.11	0.0037	1	47.42	5.6e-05	K	LREQLGPVTQEFWDNLEK	E
13	gi|119587681	apolipoprotein A-I, isoform CRA_b, partial [Homo sapiens]	786	23454	52	38	29	23	73.6	1609	1	0	0	1126.07	2250.12	2	2250.12	0.0054	2	35.14	0.42	K	DLEEVKAKVQPYLDDFQK	K
13	gi|119587681	apolipoprotein A-I, isoform CRA_b, partial [Homo sapiens]	786	23454	52	38	29	23	73.6	1610	1	0	0	751.056	2250.15	3	2250.14	0.0039	2	50.76	0.018	R	QKLHELQEKLSPLGEEMR	D
13	gi|119587681	apolipoprotein A-I, isoform CRA_b, partial [Homo sapiens]	786	23454	52	38	29	23	73.6	1613	1	0	1	1126.58	2251.15	2	2251.15	0.003	1	43.21	0.00015	K	QLNLKLLDNWDSVTSTFSK	L
13	gi|119587681	apolipoprotein A-I, isoform CRA_b, partial [Homo sapiens]	786	23454	52	38	29	23	73.6	1653	1	0	0	765.392	2293.15	3	2293.15	0.0046	2	38.31	0.0063	R	QKLHELQEKLSPLGEEMR	D
13	gi|119587681	apolipoprotein A-I, isoform CRA_b, partial [Homo sapiens]	786	23454	52	38	29	23	73.6	1866	1	0	1	855.454	2563.34	3	2563.34	0.0004	2	38.36	0.00025	K	QLNLKLLDNWDSVTSTFSKLR	E
13	gi|119587681	apolipoprotein A-I, isoform CRA_b, partial [Homo sapiens]	786	23454	52	38	29	23	73.6	1921	1	0	0	873.43	2617.27	3	2617.27	0.0022	1	69.93	5.2e-07	R	EQLGPVTQEFWDNLEKETEGLR	Q
13	gi|119587681	apolipoprotein A-I, isoform CRA_b, partial [Homo sapiens]	786	23454	52	38	29	23	73.6	1950	1	0	0	1331.14	2660.27	2	2660.27	0.0012	1	53.14	1.2e-05	R	EQLGPVTQEFWDNLEKETEGLR	Q
13	gi|119587681	apolipoprotein A-I, isoform CRA_b, partial [Homo sapiens]	786	23454	52	38	29	23	73.6	1951	1	0	0	1331.14	2660.27	2	2660.27	0.0024	1	67.26	1.2e-06	R	EQLGPVTQEFWDNLEKETEGLR	Q
13	gi|119587681	apolipoprotein A-I, isoform CRA_b, partial [Homo sapiens]	786	23454	52	38	29	23	73.6	1952	1	0	0	887.766	2660.28	3	2660.27	0.0035	1	41.86	0.00012	R	EQLGPVTQEFWDNLEKETEGLR	Q
13	gi|119587681	apolipoprotein A-I, isoform CRA_b, partial [Homo sapiens]	786	23454	52	38	29	23	73.6	1953	1	0	0	887.767	2660.28	3	2660.27	0.0086	1	30.4	0.68	R	EQLGPVTQEFWDNLEKETEGLR	Q
13	gi|119587681	apolipoprotein A-I, isoform CRA_b, partial [Homo sapiens]	786	23454	52	38	29	23	73.6	1981	1	0	0	902.101	2703.28	3	2703.28	0.0027	1	3.99	0.42	R	EQLGPVTQEFWDNLEKETEGLR	Q
13	gi|119587681	apolipoprotein A-I, isoform CRA_b, partial [Homo sapiens]	786	23454	52	38	29	23	73.6	2088	1	0	0	722.623	2886.46	4	2886.45	0.0101	2	49.94	5.3e-05	K	LREQLGPVTQEFWDNLEKETEGLR	Q
13	gi|119587681	apolipoprotein A-I, isoform CRA_b, partial [Homo sapiens]	786	23454	52	38	29	23	73.6	2203	1	0	0	806.142	3220.54	4	3220.53	0.0043	2	14.28	0.046	R	EQLGPVTQEFWDNLEKETEGLRQEMSK	D
13	gi|119587681	apolipoprotein A-I, isoform CRA_b, partial [Homo sapiens]	786	23454	52	38	29	23	73.6	2204	1	0	0	1074.52	3220.54	3	3220.53	0.0045	2	12.75	0.064	R	EQLGPVTQEFWDNLEKETEGLRQEMSK	D
13	gi|119587681	apolipoprotein A-I, isoform CRA_b, partial [Homo sapiens]	786	23454	52	38	29	23	73.6	2216	1	0	0	1088.85	3263.54	3	3263.54	0.0012	2	31.72	0.0049	R	EQLGPVTQEFWDNLEKETEGLRQEMSK	D
13	gi|119587681	apolipoprotein A-I, isoform CRA_b, partial [Homo sapiens]	786	23454	52	38	29	23	73.6	2217	1	0	0	1088.86	3263.54	3	3263.54	0.0033	2	38.2	0.00084	R	EQLGPVTQEFWDNLEKETEGLRQEMSK	D
13	gi|119587681	apolipoprotein A-I, isoform CRA_b, partial [Homo sapiens]	786	23454	52	38	29	23	73.6	2222	1	0	0	1103.19	3306.55	3	3306.55	0.0046	2	9.49	0.26	R	EQLGPVTQEFWDNLEKETEGLRQEMSK	D
14	gi|229479	lipoprotein Gln I	403	28329	41	29	25	19	58.8	89	1	0	0	470.248	938.482	2	938.482	-0.0003	0	15.88	0.33	K	LHELQEK	L
14	gi|229479	lipoprotein Gln I	403	28329	41	29	25	19	58.8	150	1	0	0	516.264	1030.51	2	1030.51	0.0023	0	36.83	0.0022	K	LSPLGEEMR	D
14	gi|229479	lipoprotein Gln I	403	28329	41	29	25	19	58.8	201	1	0	0	549.799	1097.58	2	1097.58	0.0004	0	29.5	0.015	K	AKPALEDLR	Q
14	gi|229479	lipoprotein Gln I	403	28329	41	29	25	19	58.8	305	2	0	1	600.822	1199.63	2	1199.63	0.0026	1	50.03	0.028	R	LEALKENGAGR	L
14	gi|229479	lipoprotein Gln I	403	28329	41	29	25	19	58.8	354	1	0	0	615.859	1229.7	2	1229.7	0.0007	0	34.17	0.023	R	QGLLPVLESFK	V
14	gi|229479	lipoprotein Gln I	403	28329	41	29	25	19	58.8	355	1	0	0	615.859	1229.7	2	1229.7	0.0017	0	50.93	0.00024	R	QGLLPVLESFK	V
14	gi|229479	lipoprotein Gln I	403	28329	41	29	25	19	58.8	362	1	0	1	618.349	1234.68	2	1234.68	0.0023	0	37.75	0.002	K	DLATVYVDVLK	D
14	gi|229479	lipoprotein Gln I	403	28329	41	29	25	19	58.8	366	1	0	0	619.829	1237.64	2	1237.64	0.0012	1	24.03	0.057	R	QKLHELQEK	L
14	gi|229479	lipoprotein Gln I	403	28329	41	29	25	19	58.8	373	1	0	1	622.322	1242.63	2	1242.63	-0.0028	1	23.69	0.99	R	LEALKENGAGR	L
14	gi|229479	lipoprotein Gln I	403	28329	41	29	25	19	58.8	384	1	0	0	626.816	1251.62	2	1251.61	0.0031	0	22.43	0.13	K	VQPYLDDFQK	K
14	gi|229479	lipoprotein Gln I	403	28329	41	29	25	19	58.8	389	1	0	0	629.818	1257.62	2	1257.62	0.0014	0	35.76	0.0064	K	ATEHLSTLSEK	A
14	gi|229479	lipoprotein Gln I	403	28329	41	29	25	19	58.8	408	1	0	0	637.362	1272.71	2	1272.71	0.0019	0	35.8	0.0017	R	QGLLPVLESFK	V
14	gi|229479	lipoprotein Gln I	403	28329	41	29	25	19	58.8	423	1	0	1	639.852	1277.69	2	1277.69	0.0031	0	8.92	0.15	K	DLATVYVDVLK	D
14	gi|229479	lipoprotein Gln I	403	28329	41	29	25	19	58.8	452	1	0	0	651.33	1300.65	2	1300.64	0.0043	0	32.15	0.0066	R	THLAPYSDELR	Q
14	gi|229479	lipoprotein Gln I	403	28329	41	29	25	19	58.8	504	1	0	0	672.83	1343.65	2	1343.65	-0.0009	0	45.32	0.00031	R	THLAPYSDELR	Q
14	gi|229479	lipoprotein Gln I	403	28329	41	29	25	19	58.8	546	1	0	0	689.832	1377.65	2	1377.64	0.0045	1	21.42	0.036	R	QEMSKDLEEVK	A
14	gi|229479	lipoprotein Gln I	403	28329	41	29	25	19	58.8	555	1	0	0	693.864	1385.71	2	1385.71	0.0058	0	64.35	4.7e-06	K	VSFLSALEEYTK	L
14	gi|229479	lipoprotein Gln I	403	28329	41	29	25	19	58.8	602	1	0	0	712.364	1422.71	2	1422.71	-0.0009	1	43.64	0.002	K	VQPYLDDFQKK	W
14	gi|229479	lipoprotein Gln I	403	28329	41	29	25	19	58.8	606	1	0	0	715.365	1428.72	2	1428.71	0.0026	0	56.23	1.8e-05	K	VSFLSALEEYTK	L
14	gi|229479	lipoprotein Gln I	403	28329	41	29	25	19	58.8	651	1	0	0	734.401	1466.79	2	1466.78	0.0041	1	17.14	0.94	K	VEPLRAELQEGAR	Q
14	gi|229479	lipoprotein Gln I	403	28329	41	29	25	19	58.8	686	1	0	0	747.885	1493.75	2	1493.75	0.0032	1	26.26	0.0072	K	AKVQPYLDDFQK	K
14	gi|229479	lipoprotein Gln I	403	28329	41	29	25	19	58.8	703	1	0	1	753.424	1504.83	2	1504.85	-0.0169	1	42.31	0.11	R	VKDLATVYVDVLK	D
14	gi|229479	lipoprotein Gln I	403	28329	41	29	25	19	58.8	747	1	0	0	769.388	1536.76	2	1536.76	0.0032	1	41.64	0.00087	K	AKVQPYLDDFQK	K
14	gi|229479	lipoprotein Gln I	403	28329	41	29	25	19	58.8	763	1	0	1	774.936	1547.86	2	1547.86	0.0007	1	53.94	0.00056	R	VKDLATVYVDVLK	D
14	gi|229479	lipoprotein Gln I	403	28329	41	29	25	19	58.8	974	1	0	1	847.442	1692.87	2	1692.87	0.0014	1	38.48	0.13	K	DLATVYVDVLKDSGR	D
14	gi|229479	lipoprotein Gln I	403	28329	41	29	25	19	58.8	1032	1	0	1	868.947	1735.88	2	1735.87	0.005	1	7.96	0.49	K	DLATVYVDVLKDSGR	D
14	gi|229479	lipoprotein Gln I	403	28329	41	29	25	19	58.8	1336	1	0	0	651.331	1950.97	3	1950.98	-0.0124	1	40.38	0.00081	K	LHELQEKLSPLGEEMR	D
14	gi|229479	lipoprotein Gln I	403	28329	41	29	25	19	58.8	1337	1	0	0	976.495	1950.97	2	1950.98	-0.0082	1	61.28	0.0019	K	LHELQEKLSPLGEEMR	D
14	gi|229479	lipoprotein Gln I	403	28329	41	29	25	19	58.8	1377	1	0	0	998.002	1993.99	2	1993.99	0.0012	1	26.87	0.0068	K	LHELQEKLSPLGEEMR	D
14	gi|229479	lipoprotein Gln I	403	28329	41	29	25	19	58.8	1384	1	0	1	1004.03	2006.04	2	2006.04	-0.001	2	21.85	0.012	R	VKDLATVYVDVLKDSGR	D
14	gi|229479	lipoprotein Gln I	403	28329	41	29	25	19	58.8	1435	1	0	0	691.021	2070.04	3	2070.04	0.0033	1	43.1	0.11	R	LAEYHAKATEHLSTLSEK	A
14	gi|229479	lipoprotein Gln I	403	28329	41	29	25	19	58.8	1609	1	0	0	1126.07	2250.12	2	2250.12	0.0054	2	35.14	0.42	K	DLEEVKAKVQPYLDDFQK	K
14	gi|229479	lipoprotein Gln I	403	28329	41	29	25	19	58.8	1610	1	0	0	751.056	2250.15	3	2250.14	0.0039	2	50.76	0.018	R	QKLHELQEKLSPLGEEMR	D
14	gi|229479	lipoprotein Gln I	403	28329	41	29	25	19	58.8	1614	1	0	0	751.402	2251.18	3	2251.18	0.004	1	33.67	0.0027	K	ATEHLSTLSEKAKPALEDLR	Q
14	gi|229479	lipoprotein Gln I	403	28329	41	29	25	19	58.8	1653	1	0	0	765.392	2293.15	3	2293.15	0.0046	2	38.31	0.0063	R	QKLHELQEKLSPLGEEMR	D
14	gi|229479	lipoprotein Gln I	403	28329	41	29	25	19	58.8	1654	1	0	0	765.737	2294.19	3	2294.19	0.0017	1	30.7	0.14	K	ATEHLSTLSEKAKPALEDLR	Q
14	gi|229479	lipoprotein Gln I	403	28329	41	29	25	19	58.8	1655	1	0	0	765.738	2294.19	3	2294.19	0.0056	1	35.22	0.0014	K	ATEHLSTLSEKAKPALEDLR	Q
14	gi|229479	lipoprotein Gln I	403	28329	41	29	25	19	58.8	1697	1	0	0	780.072	2337.19	3	2337.19	0.0021	1	21.59	0.019	K	ATEHLSTLSEKAKPALEDLR	Q
14	gi|229479	lipoprotein Gln I	403	28329	41	29	25	19	58.8	1937	1	0	0	881.14	2640.4	3	2640.41	-0.0054	1	30.71	0.0013	R	QGLLPVLESFKVSFLSALEEYTK	L
14	gi|229479	lipoprotein Gln I	403	28329	41	29	25	19	58.8	2166	1	0	0	777.658	3106.6	4	3106.6	-0.0029	2	42.3	0.037	R	LAEYHAKATEHLSTLSEKAKPALEDLR	Q
14	gi|229479	lipoprotein Gln I	403	28329	41	29	25	19	58.8	2178	1	0	0	788.411	3149.61	4	3149.61	0.0028	2	21.23	0.21	R	LAEYHAKATEHLSTLSEKAKPALEDLR	Q
15	gi|253362	apolipoprotein AI, apo AI [human, spleen, Peptide Mutant, 88 aa]	397	10155	24	15	10	8	73.9	362	1	0	1	618.349	1234.68	2	1234.68	0.0023	0	37.75	0.002	K	DLATVYVDVLK	D
15	gi|253362	apolipoprotein AI, apo AI [human, spleen, Peptide Mutant, 88 aa]	397	10155	24	15	10	8	73.9	423	1	0	1	639.852	1277.69	2	1277.69	0.0031	0	8.92	0.15	K	DLATVYVDVLK	D
15	gi|253362	apolipoprotein AI, apo AI [human, spleen, Peptide Mutant, 88 aa]	397	10155	24	15	10	8	73.9	703	1	0	1	753.424	1504.83	2	1504.85	-0.0169	1	42.31	0.11	R	VKDLATVYVDVLK	D
15	gi|253362	apolipoprotein AI, apo AI [human, spleen, Peptide Mutant, 88 aa]	397	10155	24	15	10	8	73.9	763	1	0	1	774.936	1547.86	2	1547.86	0.0007	1	53.94	0.00056	R	VKDLATVYVDVLK	D
15	gi|253362	apolipoprotein AI, apo AI [human, spleen, Peptide Mutant, 88 aa]	397	10155	24	15	10	8	73.9	865	1	0	0	806.898	1611.78	2	1611.78	0.0032	0	73.95	6.5e-07	K	LLDNWDSVTSTFSK	R
15	gi|253362	apolipoprotein AI, apo AI [human, spleen, Peptide Mutant, 88 aa]	397	10155	24	15	10	8	73.9	922	1	0	0	828.4	1654.79	2	1654.78	0.002	0	45.91	0.0002	K	LLDNWDSVTSTFSK	R
15	gi|253362	apolipoprotein AI, apo AI [human, spleen, Peptide Mutant, 88 aa]	397	10155	24	15	10	8	73.9	974	1	0	1	847.442	1692.87	2	1692.87	0.0014	1	38.48	0.13	K	DLATVYVDVLKDSGR	V
15	gi|253362	apolipoprotein AI, apo AI [human, spleen, Peptide Mutant, 88 aa]	397	10155	24	15	10	8	73.9	1032	1	0	1	868.947	1735.88	2	1735.87	0.005	1	7.96	0.49	K	DLATVYVDVLKDSGR	V
15	gi|253362	apolipoprotein AI, apo AI [human, spleen, Peptide Mutant, 88 aa]	397	10155	24	15	10	8	73.9	1311	1	0	0	966.971	1931.93	2	1931.93	0.001	0	54.94	2.2e-05	R	EQLGPVTQEFWDNLEK	E
15	gi|253362	apolipoprotein AI, apo AI [human, spleen, Peptide Mutant, 88 aa]	397	10155	24	15	10	8	73.9	1352	2	0	1	984.495	1966.97	2	1966.99	-0.0112	2	29.2	1.7	K	LLDNWDSVTSTFSKRR	E
15	gi|253362	apolipoprotein AI, apo AI [human, spleen, Peptide Mutant, 88 aa]	397	10155	24	15	10	8	73.9	1359	1	0	0	988.476	1974.94	2	1974.93	0.0041	0	26.3	0.0034	R	EQLGPVTQEFWDNLEK	E
15	gi|253362	apolipoprotein AI, apo AI [human, spleen, Peptide Mutant, 88 aa]	397	10155	24	15	10	8	73.9	1384	1	0	1	1004.03	2006.04	2	2006.04	-0.001	2	21.85	0.012	R	VKDLATVYVDVLKDSGR	V
15	gi|253362	apolipoprotein AI, apo AI [human, spleen, Peptide Mutant, 88 aa]	397	10155	24	15	10	8	73.9	1613	1	0	1	1126.58	2251.15	2	2251.15	0.003	1	43.21	0.00015	K	QLNLKLLDNWDSVTSTFSK	R
15	gi|253362	apolipoprotein AI, apo AI [human, spleen, Peptide Mutant, 88 aa]	397	10155	24	15	10	8	73.9	1921	1	0	0	873.43	2617.27	3	2617.27	0.0022	1	69.93	5.2e-07	R	EQLGPVTQEFWDNLEKETEGLR	Q
15	gi|253362	apolipoprotein AI, apo AI [human, spleen, Peptide Mutant, 88 aa]	397	10155	24	15	10	8	73.9	1950	1	0	0	1331.14	2660.27	2	2660.27	0.0012	1	53.14	1.2e-05	R	EQLGPVTQEFWDNLEKETEGLR	Q
15	gi|253362	apolipoprotein AI, apo AI [human, spleen, Peptide Mutant, 88 aa]	397	10155	24	15	10	8	73.9	1951	1	0	0	1331.14	2660.27	2	2660.27	0.0024	1	67.26	1.2e-06	R	EQLGPVTQEFWDNLEKETEGLR	Q
15	gi|253362	apolipoprotein AI, apo AI [human, spleen, Peptide Mutant, 88 aa]	397	10155	24	15	10	8	73.9	1952	1	0	0	887.766	2660.28	3	2660.27	0.0035	1	41.86	0.00012	R	EQLGPVTQEFWDNLEKETEGLR	Q
15	gi|253362	apolipoprotein AI, apo AI [human, spleen, Peptide Mutant, 88 aa]	397	10155	24	15	10	8	73.9	1953	1	0	0	887.767	2660.28	3	2660.27	0.0086	1	30.4	0.68	R	EQLGPVTQEFWDNLEKETEGLR	Q
15	gi|253362	apolipoprotein AI, apo AI [human, spleen, Peptide Mutant, 88 aa]	397	10155	24	15	10	8	73.9	1981	1	0	0	902.101	2703.28	3	2703.28	0.0027	1	3.99	0.42	R	EQLGPVTQEFWDNLEKETEGLR	Q
15	gi|253362	apolipoprotein AI, apo AI [human, spleen, Peptide Mutant, 88 aa]	397	10155	24	15	10	8	73.9	2203	1	0	0	806.142	3220.54	4	3220.53	0.0043	2	14.28	0.046	R	EQLGPVTQEFWDNLEKETEGLRQEMSK	-
15	gi|253362	apolipoprotein AI, apo AI [human, spleen, Peptide Mutant, 88 aa]	397	10155	24	15	10	8	73.9	2204	1	0	0	1074.52	3220.54	3	3220.53	0.0045	2	12.75	0.064	R	EQLGPVTQEFWDNLEKETEGLRQEMSK	-
15	gi|253362	apolipoprotein AI, apo AI [human, spleen, Peptide Mutant, 88 aa]	397	10155	24	15	10	8	73.9	2216	1	0	0	1088.85	3263.54	3	3263.54	0.0012	2	31.72	0.0049	R	EQLGPVTQEFWDNLEKETEGLRQEMSK	-
15	gi|253362	apolipoprotein AI, apo AI [human, spleen, Peptide Mutant, 88 aa]	397	10155	24	15	10	8	73.9	2217	1	0	0	1088.86	3263.54	3	3263.54	0.0033	2	38.2	0.00084	R	EQLGPVTQEFWDNLEKETEGLRQEMSK	-
15	gi|253362	apolipoprotein AI, apo AI [human, spleen, Peptide Mutant, 88 aa]	397	10155	24	15	10	8	73.9	2222	1	0	0	1103.19	3306.55	3	3306.55	0.0046	2	9.49	0.26	R	EQLGPVTQEFWDNLEKETEGLRQEMSK	-
15	gi|4960066	apolipoprotein A1 [Homo sapiens]	94	7429	7	5	5	4	73.1	150	1	0	0	516.264	1030.51	2	1030.51	0.0023	0	36.83	0.0022	-	LSPLGEEMR	D
15	gi|4960066	apolipoprotein A1 [Homo sapiens]	94	7429	7	5	5	4	73.1	305	1	0	0	600.822	1199.63	2	1199.63	0.0026	1	57.74	0.0047	R	LEALKENGGAR	L
15	gi|4960066	apolipoprotein A1 [Homo sapiens]	94	7429	7	5	5	4	73.1	373	2	0	0	622.322	1242.63	2	1242.63	-0.0028	1	22.37	1.3	R	LEALKENGGAR	L
15	gi|4960066	apolipoprotein A1 [Homo sapiens]	94	7429	7	5	5	4	73.1	389	1	0	0	629.818	1257.62	2	1257.62	0.0014	0	35.76	0.0064	K	ATEHLSTLSEK	A
15	gi|4960066	apolipoprotein A1 [Homo sapiens]	94	7429	7	5	5	4	73.1	452	1	0	0	651.33	1300.65	2	1300.64	0.0043	0	32.15	0.0066	R	THLAPYSDELR	Q
15	gi|4960066	apolipoprotein A1 [Homo sapiens]	94	7429	7	5	5	4	73.1	504	1	0	0	672.83	1343.65	2	1343.65	-0.0009	0	45.32	0.00031	R	THLAPYSDELR	Q
15	gi|4960066	apolipoprotein A1 [Homo sapiens]	94	7429	7	5	5	4	73.1	1435	1	0	0	691.021	2070.04	3	2070.04	0.0033	1	43.1	0.11	R	LAEYHAKATEHLSTLSEK	A
15	gi|19569153	apolipoprotein A-1 A175P variant [Homo sapiens]	73	5604	4	3	2	2	44	305	1	0	0	600.822	1199.63	2	1199.63	0.0026	1	57.74	0.0047	R	LEALKENGGAR	L
15	gi|19569153	apolipoprotein A-1 A175P variant [Homo sapiens]	73	5604	4	3	2	2	44	373	2	0	0	622.322	1242.63	2	1242.63	-0.0028	1	22.37	1.3	R	LEALKENGGAR	L
15	gi|19569153	apolipoprotein A-1 A175P variant [Homo sapiens]	73	5604	4	3	2	2	44	452	1	0	0	651.33	1300.65	2	1300.64	0.0043	0	32.15	0.0066	R	THLAPYSDELR	Q
15	gi|19569153	apolipoprotein A-1 A175P variant [Homo sapiens]	73	5604	4	3	2	2	44	504	1	0	0	672.83	1343.65	2	1343.65	-0.0009	0	45.32	0.00031	R	THLAPYSDELR	Q
16	gi|13787109	Chain A, A 2.1 Angstrom Structure Of An Uncleaved Alpha-1-Antitrypsin Shows Variability Of The Reactive Center And Other Loops	785	44250	76	44	37	27	72.6	52	7	1	0	426.75	851.484	2	851.486	-0.002	0	3.71	1.6	R	SASLHLPK	L
16	gi|13787109	Chain A, A 2.1 Angstrom Structure Of An Uncleaved Alpha-1-Antitrypsin Shows Variability Of The Reactive Center And Other Loops	785	44250	76	44	37	27	72.6	63	1	1	0	444.756	887.498	2	887.496	0.0019	0	20.94	0.089	K	AVLTIDEK	G
16	gi|13787109	Chain A, A 2.1 Angstrom Structure Of An Uncleaved Alpha-1-Antitrypsin Shows Variability Of The Reactive Center And Other Loops	785	44250	76	44	37	27	72.6	64	6	1	0	448.254	894.493	2	894.492	0.0006	0	5.83	2.4	R	SASLHLPK	L
16	gi|13787109	Chain A, A 2.1 Angstrom Structure Of An Uncleaved Alpha-1-Antitrypsin Shows Variability Of The Reactive Center And Other Loops	785	44250	76	44	37	27	72.6	134	1	1	0	508.311	1014.61	2	1014.61	0.0009	0	17.51	0.052	K	SVLGQLGITK	V
16	gi|13787109	Chain A, A 2.1 Angstrom Structure Of An Uncleaved Alpha-1-Antitrypsin Shows Variability Of The Reactive Center And Other Loops	785	44250	76	44	37	27	72.6	184	1	1	0	538.813	1075.61	2	1075.61	0.0007	0	18.75	0.17	K	LSSWVLLMK	Y
16	gi|13787109	Chain A, A 2.1 Angstrom Structure Of An Uncleaved Alpha-1-Antitrypsin Shows Variability Of The Reactive Center And Other Loops	785	44250	76	44	37	27	72.6	185	1	1	0	538.814	1075.61	2	1075.61	0.0031	0	28.21	0.11	K	LSSWVLLMK	Y
16	gi|13787109	Chain A, A 2.1 Angstrom Structure Of An Uncleaved Alpha-1-Antitrypsin Shows Variability Of The Reactive Center And Other Loops	785	44250	76	44	37	27	72.6	208	1	1	0	555.806	1109.6	2	1109.6	0.001	0	56.04	2.2e-05	K	LSITGTYDLK	S
16	gi|13787109	Chain A, A 2.1 Angstrom Structure Of An Uncleaved Alpha-1-Antitrypsin Shows Variability Of The Reactive Center And Other Loops	785	44250	76	44	37	27	72.6	288	1	1	0	590.305	1178.6	2	1178.59	0.0027	1	19.89	0.032	K	KQINDYVEK	G
16	gi|13787109	Chain A, A 2.1 Angstrom Structure Of An Uncleaved Alpha-1-Antitrypsin Shows Variability Of The Reactive Center And Other Loops	785	44250	76	44	37	27	72.6	315	1	1	0	602.862	1203.71	2	1203.7	0.0047	1	29.15	0.03	K	KLSSWVLLMK	Y
16	gi|13787109	Chain A, A 2.1 Angstrom Structure Of An Uncleaved Alpha-1-Antitrypsin Shows Variability Of The Reactive Center And Other Loops	785	44250	76	44	37	27	72.6	371	1	1	0	621.857	1241.7	2	1241.7	0.0015	1	42.11	0.00033	K	IVDLVKELDR	D
16	gi|13787109	Chain A, A 2.1 Angstrom Structure Of An Uncleaved Alpha-1-Antitrypsin Shows Variability Of The Reactive Center And Other Loops	785	44250	76	44	37	27	72.6	372	1	1	0	621.859	1241.7	2	1241.7	0.0057	1	42.88	0.027	K	IVDLVKELDR	D
16	gi|13787109	Chain A, A 2.1 Angstrom Structure Of An Uncleaved Alpha-1-Antitrypsin Shows Variability Of The Reactive Center And Other Loops	785	44250	76	44	37	27	72.6	376	1	1	0	624.306	1246.6	2	1246.6	0.0032	0	37.74	0.002	R	LGMFNIQHCK	K
16	gi|13787109	Chain A, A 2.1 Angstrom Structure Of An Uncleaved Alpha-1-Antitrypsin Shows Variability Of The Reactive Center And Other Loops	785	44250	76	44	37	27	72.6	377	1	1	0	624.364	1246.71	2	1246.71	0.0021	1	24.77	0.008	K	KLSSWVLLMK	Y
16	gi|13787109	Chain A, A 2.1 Angstrom Structure Of An Uncleaved Alpha-1-Antitrypsin Shows Variability Of The Reactive Center And Other Loops	785	44250	76	44	37	27	72.6	378	1	1	0	624.846	1247.68	2	1247.68	0.0015	1	41.96	0.0065	K	LVDKFLEDVK	K
16	gi|13787109	Chain A, A 2.1 Angstrom Structure Of An Uncleaved Alpha-1-Antitrypsin Shows Variability Of The Reactive Center And Other Loops	785	44250	76	44	37	27	72.6	379	2	1	0	624.846	1247.68	2	1247.68	0.0017	1	6.97	1.3	K	LVDKFLEDVK	K
16	gi|13787109	Chain A, A 2.1 Angstrom Structure Of An Uncleaved Alpha-1-Antitrypsin Shows Variability Of The Reactive Center And Other Loops	785	44250	76	44	37	27	72.6	415	1	1	0	638.347	1274.68	2	1274.68	0.0031	1	19.53	0.57	K	GKWERPFEVK	D
16	gi|13787109	Chain A, A 2.1 Angstrom Structure Of An Uncleaved Alpha-1-Antitrypsin Shows Variability Of The Reactive Center And Other Loops	785	44250	76	44	37	27	72.6	431	1	1	0	643.36	1284.7	2	1284.7	0.0013	1	29.78	0.056	K	IVDLVKELDR	D
16	gi|13787109	Chain A, A 2.1 Angstrom Structure Of An Uncleaved Alpha-1-Antitrypsin Shows Variability Of The Reactive Center And Other Loops	785	44250	76	44	37	27	72.6	439	1	1	0	645.808	1289.6	2	1289.6	-0.0002	0	61.12	2.6e-05	R	LGMFNIQHCK	K
16	gi|13787109	Chain A, A 2.1 Angstrom Structure Of An Uncleaved Alpha-1-Antitrypsin Shows Variability Of The Reactive Center And Other Loops	785	44250	76	44	37	27	72.6	441	1	1	0	646.349	1290.68	2	1290.68	0.0015	1	14.52	0.25	K	LVDKFLEDVK	K
16	gi|13787109	Chain A, A 2.1 Angstrom Structure Of An Uncleaved Alpha-1-Antitrypsin Shows Variability Of The Reactive Center And Other Loops	785	44250	76	44	37	27	72.6	471	1	1	0	659.846	1317.68	2	1317.68	-0.0049	1	26.19	0.21	K	GKWERPFEVK	D
16	gi|13787109	Chain A, A 2.1 Angstrom Structure Of An Uncleaved Alpha-1-Antitrypsin Shows Variability Of The Reactive Center And Other Loops	785	44250	76	44	37	27	72.6	528	1	1	0	681.352	1360.69	2	1360.69	0.0003	1	14.9	0.51	K	GKWERPFEVK	D
16	gi|13787109	Chain A, A 2.1 Angstrom Structure Of An Uncleaved Alpha-1-Antitrypsin Shows Variability Of The Reactive Center And Other Loops	785	44250	76	44	37	27	72.6	535	1	1	0	683.89	1365.77	2	1365.76	0.0039	1	57.65	0.0039	K	AVHKAVLTIDEK	G
16	gi|13787109	Chain A, A 2.1 Angstrom Structure Of An Uncleaved Alpha-1-Antitrypsin Shows Variability Of The Reactive Center And Other Loops	785	44250	76	44	37	27	72.6	543	1	1	0	688.894	1375.77	2	1375.77	0.0025	2	58.61	0.0028	K	LVDKFLEDVKK	L
16	gi|13787109	Chain A, A 2.1 Angstrom Structure Of An Uncleaved Alpha-1-Antitrypsin Shows Variability Of The Reactive Center And Other Loops	785	44250	76	44	37	27	72.6	577	1	1	0	705.381	1408.75	2	1408.77	-0.0198	1	49.66	6.8e-05	K	AVHKAVLTIDEK	G
16	gi|13787109	Chain A, A 2.1 Angstrom Structure Of An Uncleaved Alpha-1-Antitrypsin Shows Variability Of The Reactive Center And Other Loops	785	44250	76	44	37	27	72.6	591	1	1	0	709.856	1417.7	2	1417.7	0.0026	1	27.67	0.0073	R	LGMFNIQHCKK	L
16	gi|13787109	Chain A, A 2.1 Angstrom Structure Of An Uncleaved Alpha-1-Antitrypsin Shows Variability Of The Reactive Center And Other Loops	785	44250	76	44	37	27	72.6	594	1	1	0	710.397	1418.78	2	1418.78	0.0017	2	35.71	0.0049	K	LVDKFLEDVKK	L
16	gi|13787109	Chain A, A 2.1 Angstrom Structure Of An Uncleaved Alpha-1-Antitrypsin Shows Variability Of The Reactive Center And Other Loops	785	44250	76	44	37	27	72.6	595	1	1	0	710.397	1418.78	2	1418.78	0.0027	2	8.5	0.31	K	LVDKFLEDVKK	L
16	gi|13787109	Chain A, A 2.1 Angstrom Structure Of An Uncleaved Alpha-1-Antitrypsin Shows Variability Of The Reactive Center And Other Loops	785	44250	76	44	37	27	72.6	646	1	1	0	731.899	1461.78	2	1461.78	0.0015	2	17.65	0.12	K	LVDKFLEDVKK	L
16	gi|13787109	Chain A, A 2.1 Angstrom Structure Of An Uncleaved Alpha-1-Antitrypsin Shows Variability Of The Reactive Center And Other Loops	785	44250	76	44	37	27	72.6	728	1	0	0	761.88	1521.74	2	1521.74	0.0025	1	39.8	0.045	K	QINDYVEKGTQGK	I
16	gi|13787109	Chain A, A 2.1 Angstrom Structure Of An Uncleaved Alpha-1-Antitrypsin Shows Variability Of The Reactive Center And Other Loops	785	44250	76	44	37	27	72.6	806	1	1	0	788.924	1575.83	2	1575.83	-0.0003	0	17.79	0.067	R	DTVFALVNYIFFK	G
16	gi|13787109	Chain A, A 2.1 Angstrom Structure Of An Uncleaved Alpha-1-Antitrypsin Shows Variability Of The Reactive Center And Other Loops	785	44250	76	44	37	27	72.6	826	1	1	1	794.93	1587.85	2	1587.84	0.0013	1	48.45	0.0029	K	SPLFMGKVVNPTQK	-
16	gi|13787109	Chain A, A 2.1 Angstrom Structure Of An Uncleaved Alpha-1-Antitrypsin Shows Variability Of The Reactive Center And Other Loops	785	44250	76	44	37	27	72.6	895	1	1	1	816.43	1630.85	2	1630.85	-0.0039	1	6.48	0.63	K	SPLFMGKVVNPTQK	-
16	gi|13787109	Chain A, A 2.1 Angstrom Structure Of An Uncleaved Alpha-1-Antitrypsin Shows Variability Of The Reactive Center And Other Loops	785	44250	76	44	37	27	72.6	896	1	1	1	816.432	1630.85	2	1630.85	-0.0005	1	28.66	0.0041	K	SPLFMGKVVNPTQK	-
16	gi|13787109	Chain A, A 2.1 Angstrom Structure Of An Uncleaved Alpha-1-Antitrypsin Shows Variability Of The Reactive Center And Other Loops	785	44250	76	44	37	27	72.6	912	1	1	0	821.435	1640.86	2	1640.86	-0.001	0	59.72	6.8e-06	K	ITPNLAEFAFSLYR	Q
16	gi|13787109	Chain A, A 2.1 Angstrom Structure Of An Uncleaved Alpha-1-Antitrypsin Shows Variability Of The Reactive Center And Other Loops	785	44250	76	44	37	27	72.6	968	1	1	0	842.935	1683.86	2	1683.86	-0.0068	0	58.94	1.2e-05	K	ITPNLAEFAFSLYR	Q
16	gi|13787109	Chain A, A 2.1 Angstrom Structure Of An Uncleaved Alpha-1-Antitrypsin Shows Variability Of The Reactive Center And Other Loops	785	44250	76	44	37	27	72.6	1038	1	1	0	580.001	1736.98	3	1736.98	0.0024	2	46.92	0.023	K	LSKAVHKAVLTIDEK	G
16	gi|13787109	Chain A, A 2.1 Angstrom Structure Of An Uncleaved Alpha-1-Antitrypsin Shows Variability Of The Reactive Center And Other Loops	785	44250	76	44	37	27	72.6	1088	1	1	0	890.999	1779.98	2	1779.98	-0.0012	2	41.29	0.00022	K	LSKAVHKAVLTIDEK	G
16	gi|13787109	Chain A, A 2.1 Angstrom Structure Of An Uncleaved Alpha-1-Antitrypsin Shows Variability Of The Reactive Center And Other Loops	785	44250	76	44	37	27	72.6	1117	1	1	0	900.485	1798.95	2	1798.95	0.0011	2	13.75	0.48	K	GTQGKIVDLVKELDR	D
16	gi|13787109	Chain A, A 2.1 Angstrom Structure Of An Uncleaved Alpha-1-Antitrypsin Shows Variability Of The Reactive Center And Other Loops	785	44250	76	44	37	27	72.6	1122	1	1	0	451.745	1802.95	4	1802.95	-0.0033	0	12.86	0.07	K	LQHLENELTHDIITK	F
16	gi|13787109	Chain A, A 2.1 Angstrom Structure Of An Uncleaved Alpha-1-Antitrypsin Shows Variability Of The Reactive Center And Other Loops	785	44250	76	44	37	27	72.6	1123	1	1	0	601.992	1802.95	3	1802.95	0.0021	0	10.09	0.11	K	LQHLENELTHDIITK	F
16	gi|13787109	Chain A, A 2.1 Angstrom Structure Of An Uncleaved Alpha-1-Antitrypsin Shows Variability Of The Reactive Center And Other Loops	785	44250	76	44	37	27	72.6	1124	1	1	0	902.486	1802.96	2	1802.95	0.0044	0	17.09	0.32	K	LQHLENELTHDIITK	F
16	gi|13787109	Chain A, A 2.1 Angstrom Structure Of An Uncleaved Alpha-1-Antitrypsin Shows Variability Of The Reactive Center And Other Loops	785	44250	76	44	37	27	72.6	1158	1	1	0	917.468	1832.92	2	1832.92	0.005	0	93.93	6.9e-08	K	VFSNGADLSGVTEEAPLK	L
16	gi|13787109	Chain A, A 2.1 Angstrom Structure Of An Uncleaved Alpha-1-Antitrypsin Shows Variability Of The Reactive Center And Other Loops	785	44250	76	44	37	27	72.6	1184	1	1	1	921.484	1840.95	2	1840.95	-0.0011	0	33.45	0.0027	K	FNKPFVFLMIDQNTK	S
16	gi|13787109	Chain A, A 2.1 Angstrom Structure Of An Uncleaved Alpha-1-Antitrypsin Shows Variability Of The Reactive Center And Other Loops	785	44250	76	44	37	27	72.6	1186	1	1	0	923.988	1845.96	2	1845.96	0.0034	0	40.4	0.00022	K	LQHLENELTHDIITK	F
16	gi|13787109	Chain A, A 2.1 Angstrom Structure Of An Uncleaved Alpha-1-Antitrypsin Shows Variability Of The Reactive Center And Other Loops	785	44250	76	44	37	27	72.6	1187	1	1	0	616.328	1845.96	3	1845.96	0.0049	0	14.33	0.045	K	LQHLENELTHDIITK	F
16	gi|13787109	Chain A, A 2.1 Angstrom Structure Of An Uncleaved Alpha-1-Antitrypsin Shows Variability Of The Reactive Center And Other Loops	785	44250	76	44	37	27	72.6	1236	1	1	0	938.97	1875.93	2	1875.92	0.0038	0	76.21	1.9e-07	K	VFSNGADLSGVTEEAPLK	L
16	gi|13787109	Chain A, A 2.1 Angstrom Structure Of An Uncleaved Alpha-1-Antitrypsin Shows Variability Of The Reactive Center And Other Loops	785	44250	76	44	37	27	72.6	1256	1	1	1	942.989	1883.96	2	1883.96	0.0033	0	47.68	0.00014	K	FNKPFVFLMIDQNTK	S
16	gi|13787109	Chain A, A 2.1 Angstrom Structure Of An Uncleaved Alpha-1-Antitrypsin Shows Variability Of The Reactive Center And Other Loops	785	44250	76	44	37	27	72.6	1262	1	1	0	946.433	1890.85	2	1890.85	0.0035	0	51.85	3e-05	K	DTEEEDFHVDQVTTVK	V
16	gi|13787109	Chain A, A 2.1 Angstrom Structure Of An Uncleaved Alpha-1-Antitrypsin Shows Variability Of The Reactive Center And Other Loops	785	44250	76	44	37	27	72.6	1368	1	1	0	994.048	1986.08	2	1986.08	0.0019	1	33.59	0.008	R	SASLHLPKLSITGTYDLK	S
16	gi|13787109	Chain A, A 2.1 Angstrom Structure Of An Uncleaved Alpha-1-Antitrypsin Shows Variability Of The Reactive Center And Other Loops	785	44250	76	44	37	27	72.6	1369	1	1	0	663.035	1986.08	3	1986.08	0.0043	1	12.7	0.066	R	SASLHLPKLSITGTYDLK	S
16	gi|13787109	Chain A, A 2.1 Angstrom Structure Of An Uncleaved Alpha-1-Antitrypsin Shows Variability Of The Reactive Center And Other Loops	785	44250	76	44	37	27	72.6	1395	1	1	0	1015.55	2029.09	2	2029.08	0.0019	1	23.43	0.0093	R	SASLHLPKLSITGTYDLK	S
16	gi|13787109	Chain A, A 2.1 Angstrom Structure Of An Uncleaved Alpha-1-Antitrypsin Shows Variability Of The Reactive Center And Other Loops	785	44250	76	44	37	27	72.6	1466	1	1	0	1045.55	2089.09	2	2089.09	0	1	34.83	0.00054	K	ELDRDTVFALVNYIFFK	G
16	gi|13787109	Chain A, A 2.1 Angstrom Structure Of An Uncleaved Alpha-1-Antitrypsin Shows Variability Of The Reactive Center And Other Loops	785	44250	76	44	37	27	72.6	1467	1	1	0	697.371	2089.09	3	2089.09	0.0024	1	25.93	0.0048	K	ELDRDTVFALVNYIFFK	G
16	gi|13787109	Chain A, A 2.1 Angstrom Structure Of An Uncleaved Alpha-1-Antitrypsin Shows Variability Of The Reactive Center And Other Loops	785	44250	76	44	37	27	72.6	1512	1	1	0	1067.05	2132.09	2	2132.09	0	1	28.87	0.0052	K	ELDRDTVFALVNYIFFK	G
16	gi|13787109	Chain A, A 2.1 Angstrom Structure Of An Uncleaved Alpha-1-Antitrypsin Shows Variability Of The Reactive Center And Other Loops	785	44250	76	44	37	27	72.6	1526	1	1	0	1075.61	2149.2	2	2149.2	0.004	1	70.59	7e-05	K	LSITGTYDLKSVLGQLGITK	V
16	gi|13787109	Chain A, A 2.1 Angstrom Structure Of An Uncleaved Alpha-1-Antitrypsin Shows Variability Of The Reactive Center And Other Loops	785	44250	76	44	37	27	72.6	1527	1	1	0	717.409	2149.2	3	2149.2	0.0054	1	15.26	0.77	K	LSITGTYDLKSVLGQLGITK	V
16	gi|13787109	Chain A, A 2.1 Angstrom Structure Of An Uncleaved Alpha-1-Antitrypsin Shows Variability Of The Reactive Center And Other Loops	785	44250	76	44	37	27	72.6	1562	1	1	0	729.352	2185.04	3	2185.03	0.0029	1	47.28	0.00021	K	LYHSEAFTVNFGDTEEAKK	Q
16	gi|13787109	Chain A, A 2.1 Angstrom Structure Of An Uncleaved Alpha-1-Antitrypsin Shows Variability Of The Reactive Center And Other Loops	785	44250	76	44	37	27	72.6	1594	1	1	0	743.687	2228.04	3	2228.04	0.0015	1	38.95	0.0021	K	LYHSEAFTVNFGDTEEAKK	Q
16	gi|13787109	Chain A, A 2.1 Angstrom Structure Of An Uncleaved Alpha-1-Antitrypsin Shows Variability Of The Reactive Center And Other Loops	785	44250	76	44	37	27	72.6	1595	1	1	0	743.688	2228.04	3	2228.04	0.0051	1	10.02	0.42	K	LYHSEAFTVNFGDTEEAKK	Q
16	gi|13787109	Chain A, A 2.1 Angstrom Structure Of An Uncleaved Alpha-1-Antitrypsin Shows Variability Of The Reactive Center And Other Loops	785	44250	76	44	37	27	72.6	1626	1	1	1	1130.07	2258.13	2	2258.13	0.0008	0	25.44	0.014	K	GTEAAGAMFLEAIPMSIPPEVK	F
16	gi|13787109	Chain A, A 2.1 Angstrom Structure Of An Uncleaved Alpha-1-Antitrypsin Shows Variability Of The Reactive Center And Other Loops	785	44250	76	44	37	27	72.6	1669	1	1	1	1151.58	2301.14	2	2301.14	-0.0018	0	17.77	0.023	K	GTEAAGAMFLEAIPMSIPPEVK	F
16	gi|13787109	Chain A, A 2.1 Angstrom Structure Of An Uncleaved Alpha-1-Antitrypsin Shows Variability Of The Reactive Center And Other Loops	785	44250	76	44	37	27	72.6	1670	1	1	1	1151.58	2301.14	2	2301.14	0.0056	0	31.68	0.0023	K	GTEAAGAMFLEAIPMSIPPEVK	F
16	gi|13787109	Chain A, A 2.1 Angstrom Structure Of An Uncleaved Alpha-1-Antitrypsin Shows Variability Of The Reactive Center And Other Loops	785	44250	76	44	37	27	72.6	1671	1	1	1	768.056	2301.14	3	2301.14	0.0062	0	2.7	0.56	K	GTEAAGAMFLEAIPMSIPPEVK	F
16	gi|13787109	Chain A, A 2.1 Angstrom Structure Of An Uncleaved Alpha-1-Antitrypsin Shows Variability Of The Reactive Center And Other Loops	785	44250	76	44	37	27	72.6	1684	1	1	0	773.409	2317.21	3	2317.21	-0.0055	2	19	0.098	K	ELDRDTVFALVNYIFFKGK	W
16	gi|13787109	Chain A, A 2.1 Angstrom Structure Of An Uncleaved Alpha-1-Antitrypsin Shows Variability Of The Reactive Center And Other Loops	785	44250	76	44	37	27	72.6	1718	1	1	0	787.746	2360.22	3	2360.22	0	2	10.39	0.3	K	ELDRDTVFALVNYIFFKGK	W
16	gi|13787109	Chain A, A 2.1 Angstrom Structure Of An Uncleaved Alpha-1-Antitrypsin Shows Variability Of The Reactive Center And Other Loops	785	44250	76	44	37	27	72.6	1969	1	1	0	895.139	2682.39	3	2682.4	-0.0028	2	11.57	0.082	K	VFSNGADLSGVTEEAPLKLSKAVHK	A
16	gi|13787109	Chain A, A 2.1 Angstrom Structure Of An Uncleaved Alpha-1-Antitrypsin Shows Variability Of The Reactive Center And Other Loops	785	44250	76	44	37	27	72.6	2004	1	1	0	917.463	2749.37	3	2749.37	-0.0008	1	45.63	0.00079	K	LQHLENELTHDIITKFLENEDR	R
16	gi|13787109	Chain A, A 2.1 Angstrom Structure Of An Uncleaved Alpha-1-Antitrypsin Shows Variability Of The Reactive Center And Other Loops	785	44250	76	44	37	27	72.6	2005	1	1	0	688.35	2749.37	4	2749.37	0.0026	1	25.17	0.2	K	LQHLENELTHDIITKFLENEDR	R
16	gi|13787109	Chain A, A 2.1 Angstrom Structure Of An Uncleaved Alpha-1-Antitrypsin Shows Variability Of The Reactive Center And Other Loops	785	44250	76	44	37	27	72.6	2023	1	1	0	931.8	2792.38	3	2792.37	0.0044	1	5.4	0.31	K	LQHLENELTHDIITKFLENEDR	R
16	gi|13787109	Chain A, A 2.1 Angstrom Structure Of An Uncleaved Alpha-1-Antitrypsin Shows Variability Of The Reactive Center And Other Loops	785	44250	76	44	37	27	72.6	2024	3	1	0	934.18	2799.52	3	2799.52	-0.0035	2	5.84	1.1	K	IVDLVKELDRDTVFALVNYIFFK	G
16	gi|13787109	Chain A, A 2.1 Angstrom Structure Of An Uncleaved Alpha-1-Antitrypsin Shows Variability Of The Reactive Center And Other Loops	785	44250	76	44	37	27	72.6	2074	1	1	1	716.313	2861.22	4	2861.22	0.0012	1	14.23	0.44	-	EDPQGDAAQKTDTSHHDQDHPTFNK	I
16	gi|13787109	Chain A, A 2.1 Angstrom Structure Of An Uncleaved Alpha-1-Antitrypsin Shows Variability Of The Reactive Center And Other Loops	785	44250	76	44	37	27	72.6	2075	1	1	1	954.751	2861.23	3	2861.22	0.0065	1	9.49	0.14	-	EDPQGDAAQKTDTSHHDQDHPTFNK	I
16	gi|13787109	Chain A, A 2.1 Angstrom Structure Of An Uncleaved Alpha-1-Antitrypsin Shows Variability Of The Reactive Center And Other Loops	785	44250	76	44	37	27	72.6	2082	1	1	0	958.513	2872.52	3	2872.52	0.0002	1	63.36	2.1e-06	K	SVLGQLGITKVFSNGADLSGVTEEAPLK	L
16	gi|13787109	Chain A, A 2.1 Angstrom Structure Of An Uncleaved Alpha-1-Antitrypsin Shows Variability Of The Reactive Center And Other Loops	785	44250	76	44	37	27	72.6	2097	1	1	0	727.375	2905.47	4	2905.47	0.0039	2	13.13	0.059	K	LQHLENELTHDIITKFLENEDRR	S
16	gi|13787109	Chain A, A 2.1 Angstrom Structure Of An Uncleaved Alpha-1-Antitrypsin Shows Variability Of The Reactive Center And Other Loops	785	44250	76	44	37	27	72.6	2098	1	1	0	969.498	2905.47	3	2905.47	0.0043	2	7.48	0.2	K	LQHLENELTHDIITKFLENEDRR	S
16	gi|13787109	Chain A, A 2.1 Angstrom Structure Of An Uncleaved Alpha-1-Antitrypsin Shows Variability Of The Reactive Center And Other Loops	785	44250	76	44	37	27	72.6	2141	1	1	0	1009.57	3025.69	3	3025.68	0.0052	2	20.46	0.012	R	SASLHLPKLSITGTYDLKSVLGQLGITK	V
16	gi|11514321	Chain A, Crystal Structure Of A Serpin:protease Complex	702	37624	66	38	34	25	67.2	52	7	0	0	426.75	851.484	2	851.486	-0.002	0	3.71	1.6	R	SASLHLPK	L
16	gi|11514321	Chain A, Crystal Structure Of A Serpin:protease Complex	702	37624	66	38	34	25	67.2	63	1	0	0	444.756	887.498	2	887.496	0.0019	0	20.94	0.089	K	AVLTIDEK	G
16	gi|11514321	Chain A, Crystal Structure Of A Serpin:protease Complex	702	37624	66	38	34	25	67.2	64	6	0	0	448.254	894.493	2	894.492	0.0006	0	5.83	2.4	R	SASLHLPK	L
16	gi|11514321	Chain A, Crystal Structure Of A Serpin:protease Complex	702	37624	66	38	34	25	67.2	134	1	0	0	508.311	1014.61	2	1014.61	0.0009	0	17.51	0.052	K	SVLGQLGITK	V
16	gi|11514321	Chain A, Crystal Structure Of A Serpin:protease Complex	702	37624	66	38	34	25	67.2	184	1	0	0	538.813	1075.61	2	1075.61	0.0007	0	18.75	0.17	K	LSSWVLLMK	Y
16	gi|11514321	Chain A, Crystal Structure Of A Serpin:protease Complex	702	37624	66	38	34	25	67.2	185	1	0	0	538.814	1075.61	2	1075.61	0.0031	0	28.21	0.11	K	LSSWVLLMK	Y
16	gi|11514321	Chain A, Crystal Structure Of A Serpin:protease Complex	702	37624	66	38	34	25	67.2	208	1	0	0	555.806	1109.6	2	1109.6	0.001	0	56.04	2.2e-05	K	LSITGTYDLK	S
16	gi|11514321	Chain A, Crystal Structure Of A Serpin:protease Complex	702	37624	66	38	34	25	67.2	288	1	0	0	590.305	1178.6	2	1178.59	0.0027	1	19.89	0.032	K	KQINDYVEK	G
16	gi|11514321	Chain A, Crystal Structure Of A Serpin:protease Complex	702	37624	66	38	34	25	67.2	315	1	0	0	602.862	1203.71	2	1203.7	0.0047	1	29.15	0.03	K	KLSSWVLLMK	Y
16	gi|11514321	Chain A, Crystal Structure Of A Serpin:protease Complex	702	37624	66	38	34	25	67.2	371	1	0	0	621.857	1241.7	2	1241.7	0.0015	1	42.11	0.00033	K	IVDLVKELDR	D
16	gi|11514321	Chain A, Crystal Structure Of A Serpin:protease Complex	702	37624	66	38	34	25	67.2	372	1	0	0	621.859	1241.7	2	1241.7	0.0057	1	42.88	0.027	K	IVDLVKELDR	D
16	gi|11514321	Chain A, Crystal Structure Of A Serpin:protease Complex	702	37624	66	38	34	25	67.2	376	1	0	0	624.306	1246.6	2	1246.6	0.0032	0	37.74	0.002	R	LGMFNIQHCK	K
16	gi|11514321	Chain A, Crystal Structure Of A Serpin:protease Complex	702	37624	66	38	34	25	67.2	377	1	0	0	624.364	1246.71	2	1246.71	0.0021	1	24.77	0.008	K	KLSSWVLLMK	Y
16	gi|11514321	Chain A, Crystal Structure Of A Serpin:protease Complex	702	37624	66	38	34	25	67.2	378	1	0	0	624.846	1247.68	2	1247.68	0.0015	1	41.96	0.0065	K	LVDKFLEDVK	K
16	gi|11514321	Chain A, Crystal Structure Of A Serpin:protease Complex	702	37624	66	38	34	25	67.2	379	2	0	0	624.846	1247.68	2	1247.68	0.0017	1	6.97	1.3	K	LVDKFLEDVK	K
16	gi|11514321	Chain A, Crystal Structure Of A Serpin:protease Complex	702	37624	66	38	34	25	67.2	415	1	0	0	638.347	1274.68	2	1274.68	0.0031	1	19.53	0.57	K	GKWERPFEVK	D
16	gi|11514321	Chain A, Crystal Structure Of A Serpin:protease Complex	702	37624	66	38	34	25	67.2	431	1	0	0	643.36	1284.7	2	1284.7	0.0013	1	29.78	0.056	K	IVDLVKELDR	D
16	gi|11514321	Chain A, Crystal Structure Of A Serpin:protease Complex	702	37624	66	38	34	25	67.2	439	1	0	0	645.808	1289.6	2	1289.6	-0.0002	0	61.12	2.6e-05	R	LGMFNIQHCK	K
16	gi|11514321	Chain A, Crystal Structure Of A Serpin:protease Complex	702	37624	66	38	34	25	67.2	441	1	0	0	646.349	1290.68	2	1290.68	0.0015	1	14.52	0.25	K	LVDKFLEDVK	K
16	gi|11514321	Chain A, Crystal Structure Of A Serpin:protease Complex	702	37624	66	38	34	25	67.2	471	1	0	0	659.846	1317.68	2	1317.68	-0.0049	1	26.19	0.21	K	GKWERPFEVK	D
16	gi|11514321	Chain A, Crystal Structure Of A Serpin:protease Complex	702	37624	66	38	34	25	67.2	528	1	0	0	681.352	1360.69	2	1360.69	0.0003	1	14.9	0.51	K	GKWERPFEVK	D
16	gi|11514321	Chain A, Crystal Structure Of A Serpin:protease Complex	702	37624	66	38	34	25	67.2	535	1	0	0	683.89	1365.77	2	1365.76	0.0039	1	57.65	0.0039	K	AVHKAVLTIDEK	G
16	gi|11514321	Chain A, Crystal Structure Of A Serpin:protease Complex	702	37624	66	38	34	25	67.2	543	1	0	0	688.894	1375.77	2	1375.77	0.0025	2	58.61	0.0028	K	LVDKFLEDVKK	L
16	gi|11514321	Chain A, Crystal Structure Of A Serpin:protease Complex	702	37624	66	38	34	25	67.2	577	1	0	0	705.381	1408.75	2	1408.77	-0.0198	1	49.66	6.8e-05	K	AVHKAVLTIDEK	G
16	gi|11514321	Chain A, Crystal Structure Of A Serpin:protease Complex	702	37624	66	38	34	25	67.2	591	1	0	0	709.856	1417.7	2	1417.7	0.0026	1	27.67	0.0073	R	LGMFNIQHCKK	L
16	gi|11514321	Chain A, Crystal Structure Of A Serpin:protease Complex	702	37624	66	38	34	25	67.2	594	1	0	0	710.397	1418.78	2	1418.78	0.0017	2	35.71	0.0049	K	LVDKFLEDVKK	L
16	gi|11514321	Chain A, Crystal Structure Of A Serpin:protease Complex	702	37624	66	38	34	25	67.2	595	1	0	0	710.397	1418.78	2	1418.78	0.0027	2	8.5	0.31	K	LVDKFLEDVKK	L
16	gi|11514321	Chain A, Crystal Structure Of A Serpin:protease Complex	702	37624	66	38	34	25	67.2	646	1	0	0	731.899	1461.78	2	1461.78	0.0015	2	17.65	0.12	K	LVDKFLEDVKK	L
16	gi|11514321	Chain A, Crystal Structure Of A Serpin:protease Complex	702	37624	66	38	34	25	67.2	728	1	0	0	761.88	1521.74	2	1521.74	0.0025	1	39.8	0.045	K	QINDYVEKGTQGK	I
16	gi|11514321	Chain A, Crystal Structure Of A Serpin:protease Complex	702	37624	66	38	34	25	67.2	767	1	0	1	776.362	1550.71	2	1550.71	-0.0008	0	24.43	0.023	K	GTEAAGAMFLEAIPM	-
16	gi|11514321	Chain A, Crystal Structure Of A Serpin:protease Complex	702	37624	66	38	34	25	67.2	806	1	0	0	788.924	1575.83	2	1575.83	-0.0003	0	17.79	0.067	R	DTVFALVNYIFFK	G
16	gi|11514321	Chain A, Crystal Structure Of A Serpin:protease Complex	702	37624	66	38	34	25	67.2	912	1	0	0	821.435	1640.86	2	1640.86	-0.001	0	59.72	6.8e-06	K	ITPNLAEFAFSLYR	Q
16	gi|11514321	Chain A, Crystal Structure Of A Serpin:protease Complex	702	37624	66	38	34	25	67.2	968	1	0	0	842.935	1683.86	2	1683.86	-0.0068	0	58.94	1.2e-05	K	ITPNLAEFAFSLYR	Q
16	gi|11514321	Chain A, Crystal Structure Of A Serpin:protease Complex	702	37624	66	38	34	25	67.2	1038	1	0	0	580.001	1736.98	3	1736.98	0.0024	2	46.92	0.023	K	LSKAVHKAVLTIDEK	G
16	gi|11514321	Chain A, Crystal Structure Of A Serpin:protease Complex	702	37624	66	38	34	25	67.2	1088	1	0	0	890.999	1779.98	2	1779.98	-0.0012	2	41.29	0.00022	K	LSKAVHKAVLTIDEK	G
16	gi|11514321	Chain A, Crystal Structure Of A Serpin:protease Complex	702	37624	66	38	34	25	67.2	1117	1	0	0	900.485	1798.95	2	1798.95	0.0011	2	13.75	0.48	K	GTQGKIVDLVKELDR	D
16	gi|11514321	Chain A, Crystal Structure Of A Serpin:protease Complex	702	37624	66	38	34	25	67.2	1122	1	0	0	451.745	1802.95	4	1802.95	-0.0033	0	12.86	0.07	K	LQHLENELTHDIITK	F
16	gi|11514321	Chain A, Crystal Structure Of A Serpin:protease Complex	702	37624	66	38	34	25	67.2	1123	1	0	0	601.992	1802.95	3	1802.95	0.0021	0	10.09	0.11	K	LQHLENELTHDIITK	F
16	gi|11514321	Chain A, Crystal Structure Of A Serpin:protease Complex	702	37624	66	38	34	25	67.2	1124	1	0	0	902.486	1802.96	2	1802.95	0.0044	0	17.09	0.32	K	LQHLENELTHDIITK	F
16	gi|11514321	Chain A, Crystal Structure Of A Serpin:protease Complex	702	37624	66	38	34	25	67.2	1158	1	0	0	917.468	1832.92	2	1832.92	0.005	0	93.93	6.9e-08	K	VFSNGADLSGVTEEAPLK	L
16	gi|11514321	Chain A, Crystal Structure Of A Serpin:protease Complex	702	37624	66	38	34	25	67.2	1186	1	0	0	923.988	1845.96	2	1845.96	0.0034	0	40.4	0.00022	K	LQHLENELTHDIITK	F
16	gi|11514321	Chain A, Crystal Structure Of A Serpin:protease Complex	702	37624	66	38	34	25	67.2	1187	1	0	0	616.328	1845.96	3	1845.96	0.0049	0	14.33	0.045	K	LQHLENELTHDIITK	F
16	gi|11514321	Chain A, Crystal Structure Of A Serpin:protease Complex	702	37624	66	38	34	25	67.2	1236	1	0	0	938.97	1875.93	2	1875.92	0.0038	0	76.21	1.9e-07	K	VFSNGADLSGVTEEAPLK	L
16	gi|11514321	Chain A, Crystal Structure Of A Serpin:protease Complex	702	37624	66	38	34	25	67.2	1262	1	0	0	946.433	1890.85	2	1890.85	0.0035	0	51.85	3e-05	K	DTEEEDFHVDQVTTVK	V
16	gi|11514321	Chain A, Crystal Structure Of A Serpin:protease Complex	702	37624	66	38	34	25	67.2	1368	1	0	0	994.048	1986.08	2	1986.08	0.0019	1	33.59	0.008	R	SASLHLPKLSITGTYDLK	S
16	gi|11514321	Chain A, Crystal Structure Of A Serpin:protease Complex	702	37624	66	38	34	25	67.2	1369	1	0	0	663.035	1986.08	3	1986.08	0.0043	1	12.7	0.066	R	SASLHLPKLSITGTYDLK	S
16	gi|11514321	Chain A, Crystal Structure Of A Serpin:protease Complex	702	37624	66	38	34	25	67.2	1395	1	0	0	1015.55	2029.09	2	2029.08	0.0019	1	23.43	0.0093	R	SASLHLPKLSITGTYDLK	S
16	gi|11514321	Chain A, Crystal Structure Of A Serpin:protease Complex	702	37624	66	38	34	25	67.2	1466	1	0	0	1045.55	2089.09	2	2089.09	0	1	34.83	0.00054	K	ELDRDTVFALVNYIFFK	G
16	gi|11514321	Chain A, Crystal Structure Of A Serpin:protease Complex	702	37624	66	38	34	25	67.2	1467	1	0	0	697.371	2089.09	3	2089.09	0.0024	1	25.93	0.0048	K	ELDRDTVFALVNYIFFK	G
16	gi|11514321	Chain A, Crystal Structure Of A Serpin:protease Complex	702	37624	66	38	34	25	67.2	1512	1	0	0	1067.05	2132.09	2	2132.09	0	1	28.87	0.0052	K	ELDRDTVFALVNYIFFK	G
16	gi|11514321	Chain A, Crystal Structure Of A Serpin:protease Complex	702	37624	66	38	34	25	67.2	1526	1	0	0	1075.61	2149.2	2	2149.2	0.004	1	70.59	7e-05	K	LSITGTYDLKSVLGQLGITK	V
16	gi|11514321	Chain A, Crystal Structure Of A Serpin:protease Complex	702	37624	66	38	34	25	67.2	1527	1	0	0	717.409	2149.2	3	2149.2	0.0054	1	15.26	0.77	K	LSITGTYDLKSVLGQLGITK	V
16	gi|11514321	Chain A, Crystal Structure Of A Serpin:protease Complex	702	37624	66	38	34	25	67.2	1562	1	0	0	729.352	2185.04	3	2185.03	0.0029	1	47.28	0.00021	K	LYHSEAFTVNFGDTEEAKK	Q
16	gi|11514321	Chain A, Crystal Structure Of A Serpin:protease Complex	702	37624	66	38	34	25	67.2	1594	1	0	0	743.687	2228.04	3	2228.04	0.0015	1	38.95	0.0021	K	LYHSEAFTVNFGDTEEAKK	Q
16	gi|11514321	Chain A, Crystal Structure Of A Serpin:protease Complex	702	37624	66	38	34	25	67.2	1595	1	0	0	743.688	2228.04	3	2228.04	0.0051	1	10.02	0.42	K	LYHSEAFTVNFGDTEEAKK	Q
16	gi|11514321	Chain A, Crystal Structure Of A Serpin:protease Complex	702	37624	66	38	34	25	67.2	1684	1	0	0	773.409	2317.21	3	2317.21	-0.0055	2	19	0.098	K	ELDRDTVFALVNYIFFKGK	W
16	gi|11514321	Chain A, Crystal Structure Of A Serpin:protease Complex	702	37624	66	38	34	25	67.2	1718	1	0	0	787.746	2360.22	3	2360.22	0	2	10.39	0.3	K	ELDRDTVFALVNYIFFKGK	W
16	gi|11514321	Chain A, Crystal Structure Of A Serpin:protease Complex	702	37624	66	38	34	25	67.2	1969	1	0	0	895.139	2682.39	3	2682.4	-0.0028	2	11.57	0.082	K	VFSNGADLSGVTEEAPLKLSKAVHK	A
16	gi|11514321	Chain A, Crystal Structure Of A Serpin:protease Complex	702	37624	66	38	34	25	67.2	2004	1	0	0	917.463	2749.37	3	2749.37	-0.0008	1	45.63	0.00079	K	LQHLENELTHDIITKFLENEDR	R
16	gi|11514321	Chain A, Crystal Structure Of A Serpin:protease Complex	702	37624	66	38	34	25	67.2	2005	1	0	0	688.35	2749.37	4	2749.37	0.0026	1	25.17	0.2	K	LQHLENELTHDIITKFLENEDR	R
16	gi|11514321	Chain A, Crystal Structure Of A Serpin:protease Complex	702	37624	66	38	34	25	67.2	2023	1	0	0	931.8	2792.38	3	2792.37	0.0044	1	5.4	0.31	K	LQHLENELTHDIITKFLENEDR	R
16	gi|11514321	Chain A, Crystal Structure Of A Serpin:protease Complex	702	37624	66	38	34	25	67.2	2024	3	0	0	934.18	2799.52	3	2799.52	-0.0035	2	5.84	1.1	K	IVDLVKELDRDTVFALVNYIFFK	G
16	gi|11514321	Chain A, Crystal Structure Of A Serpin:protease Complex	702	37624	66	38	34	25	67.2	2082	1	0	0	958.513	2872.52	3	2872.52	0.0002	1	63.36	2.1e-06	K	SVLGQLGITKVFSNGADLSGVTEEAPLK	L
16	gi|11514321	Chain A, Crystal Structure Of A Serpin:protease Complex	702	37624	66	38	34	25	67.2	2097	1	0	0	727.375	2905.47	4	2905.47	0.0039	2	13.13	0.059	K	LQHLENELTHDIITKFLENEDRR	S
16	gi|11514321	Chain A, Crystal Structure Of A Serpin:protease Complex	702	37624	66	38	34	25	67.2	2098	1	0	0	969.498	2905.47	3	2905.47	0.0043	2	7.48	0.2	K	LQHLENELTHDIITKFLENEDRR	S
16	gi|11514321	Chain A, Crystal Structure Of A Serpin:protease Complex	702	37624	66	38	34	25	67.2	2141	1	0	0	1009.57	3025.69	3	3025.68	0.0052	2	20.46	0.012	R	SASLHLPKLSITGTYDLKSVLGQLGITK	V
17	gi|110350939	alpha-1 antitrypsin variant [Homo sapiens]	752	46577	73	43	35	26	58.6	52	7	0	0	426.75	851.484	2	851.486	-0.002	0	3.71	1.6	R	SASLHLPK	L
17	gi|110350939	alpha-1 antitrypsin variant [Homo sapiens]	752	46577	73	43	35	26	58.6	63	1	0	0	444.756	887.498	2	887.496	0.0019	0	20.94	0.089	K	AVLTIDEK	G
17	gi|110350939	alpha-1 antitrypsin variant [Homo sapiens]	752	46577	73	43	35	26	58.6	64	6	0	0	448.254	894.493	2	894.492	0.0006	0	5.83	2.4	R	SASLHLPK	L
17	gi|110350939	alpha-1 antitrypsin variant [Homo sapiens]	752	46577	73	43	35	26	58.6	134	1	0	0	508.311	1014.61	2	1014.61	0.0009	0	17.51	0.052	K	SVLGQLGITK	V
17	gi|110350939	alpha-1 antitrypsin variant [Homo sapiens]	752	46577	73	43	35	26	58.6	184	1	0	0	538.813	1075.61	2	1075.61	0.0007	0	18.75	0.17	K	LSSWVLLMK	Y
17	gi|110350939	alpha-1 antitrypsin variant [Homo sapiens]	752	46577	73	43	35	26	58.6	185	1	0	0	538.814	1075.61	2	1075.61	0.0031	0	28.21	0.11	K	LSSWVLLMK	Y
17	gi|110350939	alpha-1 antitrypsin variant [Homo sapiens]	752	46577	73	43	35	26	58.6	208	1	0	0	555.806	1109.6	2	1109.6	0.001	0	56.04	2.2e-05	K	LSITGTYDLK	S
17	gi|110350939	alpha-1 antitrypsin variant [Homo sapiens]	752	46577	73	43	35	26	58.6	288	1	0	0	590.305	1178.6	2	1178.59	0.0027	1	19.89	0.032	K	KQINDYVEK	G
17	gi|110350939	alpha-1 antitrypsin variant [Homo sapiens]	752	46577	73	43	35	26	58.6	315	1	0	0	602.862	1203.71	2	1203.7	0.0047	1	29.15	0.03	K	KLSSWVLLMK	Y
17	gi|110350939	alpha-1 antitrypsin variant [Homo sapiens]	752	46577	73	43	35	26	58.6	371	1	0	0	621.857	1241.7	2	1241.7	0.0015	1	42.11	0.00033	K	IVDLVKELDR	D
17	gi|110350939	alpha-1 antitrypsin variant [Homo sapiens]	752	46577	73	43	35	26	58.6	372	1	0	0	621.859	1241.7	2	1241.7	0.0057	1	42.88	0.027	K	IVDLVKELDR	D
17	gi|110350939	alpha-1 antitrypsin variant [Homo sapiens]	752	46577	73	43	35	26	58.6	376	1	0	0	624.306	1246.6	2	1246.6	0.0032	0	37.74	0.002	R	LGMFNIQHCK	K
17	gi|110350939	alpha-1 antitrypsin variant [Homo sapiens]	752	46577	73	43	35	26	58.6	377	1	0	0	624.364	1246.71	2	1246.71	0.0021	1	24.77	0.008	K	KLSSWVLLMK	Y
17	gi|110350939	alpha-1 antitrypsin variant [Homo sapiens]	752	46577	73	43	35	26	58.6	378	1	0	0	624.846	1247.68	2	1247.68	0.0015	1	41.96	0.0065	K	LVDKFLEDVK	K
17	gi|110350939	alpha-1 antitrypsin variant [Homo sapiens]	752	46577	73	43	35	26	58.6	379	2	0	0	624.846	1247.68	2	1247.68	0.0017	1	6.97	1.3	K	LVDKFLEDVK	K
17	gi|110350939	alpha-1 antitrypsin variant [Homo sapiens]	752	46577	73	43	35	26	58.6	415	1	0	0	638.347	1274.68	2	1274.68	0.0031	1	19.53	0.57	K	GKWERPFEVK	D
17	gi|110350939	alpha-1 antitrypsin variant [Homo sapiens]	752	46577	73	43	35	26	58.6	431	1	0	0	643.36	1284.7	2	1284.7	0.0013	1	29.78	0.056	K	IVDLVKELDR	D
17	gi|110350939	alpha-1 antitrypsin variant [Homo sapiens]	752	46577	73	43	35	26	58.6	439	1	0	0	645.808	1289.6	2	1289.6	-0.0002	0	61.12	2.6e-05	R	LGMFNIQHCK	K
17	gi|110350939	alpha-1 antitrypsin variant [Homo sapiens]	752	46577	73	43	35	26	58.6	441	1	0	0	646.349	1290.68	2	1290.68	0.0015	1	14.52	0.25	K	LVDKFLEDVK	K
17	gi|110350939	alpha-1 antitrypsin variant [Homo sapiens]	752	46577	73	43	35	26	58.6	471	1	0	0	659.846	1317.68	2	1317.68	-0.0049	1	26.19	0.21	K	GKWERPFEVK	D
17	gi|110350939	alpha-1 antitrypsin variant [Homo sapiens]	752	46577	73	43	35	26	58.6	528	1	0	0	681.352	1360.69	2	1360.69	0.0003	1	14.9	0.51	K	GKWERPFEVK	D
17	gi|110350939	alpha-1 antitrypsin variant [Homo sapiens]	752	46577	73	43	35	26	58.6	535	1	0	0	683.89	1365.77	2	1365.76	0.0039	1	57.65	0.0039	K	AVHKAVLTIDEK	G
17	gi|110350939	alpha-1 antitrypsin variant [Homo sapiens]	752	46577	73	43	35	26	58.6	543	1	0	0	688.894	1375.77	2	1375.77	0.0025	2	58.61	0.0028	K	LVDKFLEDVKK	L
17	gi|110350939	alpha-1 antitrypsin variant [Homo sapiens]	752	46577	73	43	35	26	58.6	577	1	0	0	705.381	1408.75	2	1408.77	-0.0198	1	49.66	6.8e-05	K	AVHKAVLTIDEK	G
17	gi|110350939	alpha-1 antitrypsin variant [Homo sapiens]	752	46577	73	43	35	26	58.6	591	1	0	0	709.856	1417.7	2	1417.7	0.0026	1	27.67	0.0073	R	LGMFNIQHCKK	L
17	gi|110350939	alpha-1 antitrypsin variant [Homo sapiens]	752	46577	73	43	35	26	58.6	594	1	0	0	710.397	1418.78	2	1418.78	0.0017	2	35.71	0.0049	K	LVDKFLEDVKK	L
17	gi|110350939	alpha-1 antitrypsin variant [Homo sapiens]	752	46577	73	43	35	26	58.6	595	1	0	0	710.397	1418.78	2	1418.78	0.0027	2	8.5	0.31	K	LVDKFLEDVKK	L
17	gi|110350939	alpha-1 antitrypsin variant [Homo sapiens]	752	46577	73	43	35	26	58.6	646	1	0	0	731.899	1461.78	2	1461.78	0.0015	2	17.65	0.12	K	LVDKFLEDVKK	L
17	gi|110350939	alpha-1 antitrypsin variant [Homo sapiens]	752	46577	73	43	35	26	58.6	728	1	0	0	761.88	1521.74	2	1521.74	0.0025	1	39.8	0.045	K	QINDYVEKGTQGK	I
17	gi|110350939	alpha-1 antitrypsin variant [Homo sapiens]	752	46577	73	43	35	26	58.6	806	1	0	0	788.924	1575.83	2	1575.83	-0.0003	0	17.79	0.067	R	DTVFALVNYIFFK	G
17	gi|110350939	alpha-1 antitrypsin variant [Homo sapiens]	752	46577	73	43	35	26	58.6	826	1	0	1	794.93	1587.85	2	1587.84	0.0013	1	48.45	0.0029	K	SPLFMGKVVNPTQK	-
17	gi|110350939	alpha-1 antitrypsin variant [Homo sapiens]	752	46577	73	43	35	26	58.6	895	1	0	1	816.43	1630.85	2	1630.85	-0.0039	1	6.48	0.63	K	SPLFMGKVVNPTQK	-
17	gi|110350939	alpha-1 antitrypsin variant [Homo sapiens]	752	46577	73	43	35	26	58.6	896	1	0	1	816.432	1630.85	2	1630.85	-0.0005	1	28.66	0.0041	K	SPLFMGKVVNPTQK	-
17	gi|110350939	alpha-1 antitrypsin variant [Homo sapiens]	752	46577	73	43	35	26	58.6	912	1	0	0	821.435	1640.86	2	1640.86	-0.001	0	59.72	6.8e-06	K	ITPNLAEFAFSLYR	Q
17	gi|110350939	alpha-1 antitrypsin variant [Homo sapiens]	752	46577	73	43	35	26	58.6	968	1	0	0	842.935	1683.86	2	1683.86	-0.0068	0	58.94	1.2e-05	K	ITPNLAEFAFSLYR	Q
17	gi|110350939	alpha-1 antitrypsin variant [Homo sapiens]	752	46577	73	43	35	26	58.6	1038	1	0	0	580.001	1736.98	3	1736.98	0.0024	2	46.92	0.023	K	LSKAVHKAVLTIDEK	G
17	gi|110350939	alpha-1 antitrypsin variant [Homo sapiens]	752	46577	73	43	35	26	58.6	1088	1	0	0	890.999	1779.98	2	1779.98	-0.0012	2	41.29	0.00022	K	LSKAVHKAVLTIDEK	G
17	gi|110350939	alpha-1 antitrypsin variant [Homo sapiens]	752	46577	73	43	35	26	58.6	1117	1	0	0	900.485	1798.95	2	1798.95	0.0011	2	13.75	0.48	K	GTQGKIVDLVKELDR	D
17	gi|110350939	alpha-1 antitrypsin variant [Homo sapiens]	752	46577	73	43	35	26	58.6	1122	1	0	0	451.745	1802.95	4	1802.95	-0.0033	0	12.86	0.07	K	LQHLENELTHDIITK	F
17	gi|110350939	alpha-1 antitrypsin variant [Homo sapiens]	752	46577	73	43	35	26	58.6	1123	1	0	0	601.992	1802.95	3	1802.95	0.0021	0	10.09	0.11	K	LQHLENELTHDIITK	F
17	gi|110350939	alpha-1 antitrypsin variant [Homo sapiens]	752	46577	73	43	35	26	58.6	1124	1	0	0	902.486	1802.96	2	1802.95	0.0044	0	17.09	0.32	K	LQHLENELTHDIITK	F
17	gi|110350939	alpha-1 antitrypsin variant [Homo sapiens]	752	46577	73	43	35	26	58.6	1158	1	0	0	917.468	1832.92	2	1832.92	0.005	0	93.93	6.9e-08	K	VFSNGADLSGVTEEAPLK	L
17	gi|110350939	alpha-1 antitrypsin variant [Homo sapiens]	752	46577	73	43	35	26	58.6	1184	1	0	1	921.484	1840.95	2	1840.95	-0.0011	0	33.45	0.0027	K	FNKPFVFLMIDQNTK	S
17	gi|110350939	alpha-1 antitrypsin variant [Homo sapiens]	752	46577	73	43	35	26	58.6	1186	1	0	0	923.988	1845.96	2	1845.96	0.0034	0	40.4	0.00022	K	LQHLENELTHDIITK	F
17	gi|110350939	alpha-1 antitrypsin variant [Homo sapiens]	752	46577	73	43	35	26	58.6	1187	1	0	0	616.328	1845.96	3	1845.96	0.0049	0	14.33	0.045	K	LQHLENELTHDIITK	F
17	gi|110350939	alpha-1 antitrypsin variant [Homo sapiens]	752	46577	73	43	35	26	58.6	1236	1	0	0	938.97	1875.93	2	1875.92	0.0038	0	76.21	1.9e-07	K	VFSNGADLSGVTEEAPLK	L
17	gi|110350939	alpha-1 antitrypsin variant [Homo sapiens]	752	46577	73	43	35	26	58.6	1256	1	0	1	942.989	1883.96	2	1883.96	0.0033	0	47.68	0.00014	K	FNKPFVFLMIDQNTK	S
17	gi|110350939	alpha-1 antitrypsin variant [Homo sapiens]	752	46577	73	43	35	26	58.6	1368	1	0	0	994.048	1986.08	2	1986.08	0.0019	1	33.59	0.008	R	SASLHLPKLSITGTYDLK	S
[truncated: 3,765 more rows]
